# Supplementary material for: Transcriptome and Metabolite Insights into Domestication Process of Cultivated Barley in China
Source: MDPI journal article supplement (doi:10.3390/plants11020209), 2022-01-14
Supplement: s1 [file s1]

# Transcriptome and Metabolite Insights into Domestication Process of Cultivated Barley in China

Yu Zhou<sup>1,2,†</sup>, Guang Lu<sup>1,†</sup>, Genlou Sun<sup>3</sup>, Daokun Sun<sup>1</sup> and Xifeng Ren<sup>1,2,\*</sup>

## Supplementary Materials and methods

### 1. Determination of Eight Grain Morphology Traits

The 29 barley accessions used in this study included nine wild accessions from the Near East Fertile Crescent (Wb-NE), ten wild accessions from Tibetan Plateau (Wb-T) and ten cultivated accessions from China (Wb-C) (Figure S1), which were provided by the United States Department of Agriculture (USDA) and the Huazhong Agricultural University barley germplasm collection (See Table S2 for details). Eight grain morphological traits (grain area, grain perimeter, grain length, grain width, length-width ratio, roundness of grain, density factor and grain diameter) were measured by using a camera-assisted phenotyping system (SC-G, Wanshen Detection Technology Co., Ltd., Hangzhou, China) (Yin et al 2015). SPSS 24.0 software was used for one way ANOVA analysis of all measured traits in the three groups.

### 2. ABBA-BABA Analysis and Treemix analysis

The VCF file containing 165,848 high-quality SNPs was used to perform ABBA-BABA analysis using the software Dsuite (0.4 version) with “Dtrios” command (Malinsky et al 2020). The ABBA-BABA statistics (D statistics) were applied to biallelic SNPs across four groups or taxa: P1, P2, P3, and O based on the rooted tree (((P1,P2),P3),O) (Malinsky et al 2020). According to the results of rooted neighbor-joining tree (Figure 1C), HS18 (a wild barley accession from the Near East Fertile Crescent) was selected as outgroup because it occupied the “O” position in the rooted tree (((P1,P2),P3),O). *H. bulbosum* was not used as an outgroup because after adding *H. bulbosum*, many SNPs were not biallelic but triallelic, which violated the requirements of ABBA-BABA test. The treemix1.13 was used to test mixture events of the three groups based on the 165,848 high quality SNPs.

### 3. PCA and Population Structure Inference based on SNPs of All Accessions

The 153 barley accessions (29 RNA-sequencing and 124 re-sequencing) were used to infer the genetic relationship of barley groups. These accessions were assigned into four groups: Wb-NE (13 accessions), Cb-NE (cultivated barley from the Near East Fertile Crescent, six accessions), Wb-T (20 accessions) and Cb-C (114 accessions representing landraces from China, specially from Tibet). The 78,861 SNPs common identified in both the VCF files of the 29 RNA-sequencing accessions and the 124 re-sequencing accessions were used to perform PCA and population structure inference. PCA and population structure inference were performed by plink (1.90b6.18 version) (Purcell et al 2007) and ADMIXTURE (1.23 version) (Alexander et al 2009), respectively. Nucleotide diversity ( $\pi$ ) of four groups was analyzed using VCFtools v0.1.16 (Danecek et al 2011).

#### 4. Selective Sweep Analysis and Identification of Selective Genes

The 114,120 high-quality SNPs randomly distributed on chromosomes were used for the selective sweep analysis for two of the three pure groups (25 accessions) by measuring  $F_{st}$  in each 15-kb genomic fragment with a step of 5 kb along all chromosomes. Genomic regions under selective sweeps were measured by the sliding windowed  $F_{st}$  using VCFtools v0.1.16 (Danecek et al 2011). The windows with the top 5%  $F_{st}$  value were considered as putative selection regions. The selective genes were considered to be in the windows with the top 5%  $F_{st}$  values (0.4314 in Wb-NE vs Wb-T and 0.7205 in Wb-T vs Cb-C), and were annotated by KEGG database.

#### 5. Extraction and Detection of Untargeted Metabolites

Untargeted metabolites were extracted from the 25 accessions, with 3 replicates per accession. Analyses were performed using an UHPLC (1290 Infinity LC, Agilent Technologies) coupled to a quadrupole time-of-flight (AB Sciex TripleTOF 6600). For HILIC separation, samples were analyzed using a 2.1 mm  $\times$  100 mm ACQUITY UPLC BEH 1.7  $\mu$ m column (waters, Ireland). In both ESI positive and negative modes, the mobile phase contained A = 25 mM ammonium acetate and 25 mM ammonium hydroxide in water, and B = acetonitrile. The gradient was 85% B for one min and was linearly reduced to 65% in 11 min, and then was reduced to 40% in 0.1 min and kept for four min, and then increased to 85% in 0.1 min, with a five min re-equilibration period employed. The ESI source conditions were set as follows: Ion Source Gas1 (Gas1) as 60, Ion Source Gas2 (Gas2) as 60, curtain gas (CUR) as 30, source temperature: 600°C, IonSpray Voltage Floating (ISVF)  $\pm$ 5500 V. In MS only acquisition, the instrument was set to acquire over the  $m/z$  range of 60-1000 Da, and the accumulation time for TOF MS scan was set at 0.20 s/spectra. In auto MS/MS acquisition, the instrument was set to acquire over the  $m/z$  range of 25-1000 Da, and the accumulation time for product ion scan was set at 0.05 s/spectra. The product ion scan was acquired using information dependent acquisition (IDA) with high sensitivity mode selected. The collision energy (CE) was fixed at 35 V with  $\pm$ 15 eV. Declustering potential (DP) was set as  $\pm$ 60V.

After detection, AB Sciex TripleTOF 6600 was used to collect the primary and secondary spectra. The raw data was converted into mzXML format by Proteowizard, and then peak alignment, retention time correction and peak area extraction were performed by XCMS program. The structure of metabolites was identified by accurate mass number matching ( $< 25$  ppm) and secondary spectrum matching. For each metabolite, the area of mass spectrum peak was calculated and corrected for preliminary quantification. After that, we searched the self-built database (with standard products) for annotating the metabolites.

Supplementary Figures and Tables

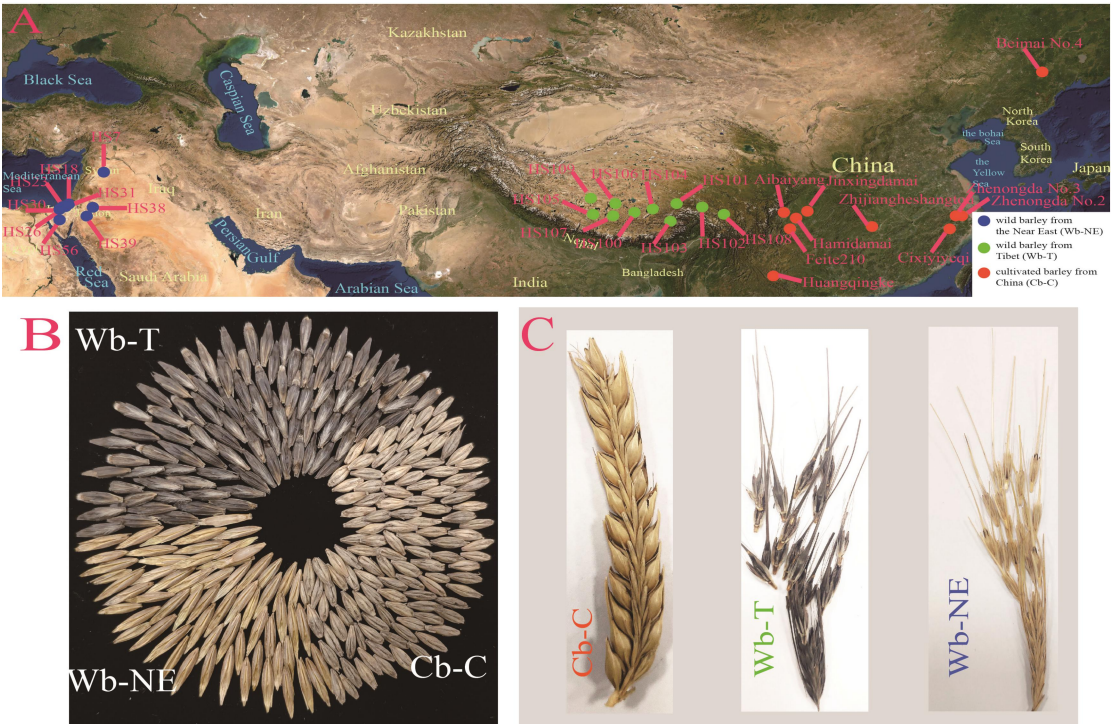

**Figure S1.** The geographic distribution of sampled three barley groups and morphology of grains and spikes. The satellite map was provided by software ShuiJingWeiTu.

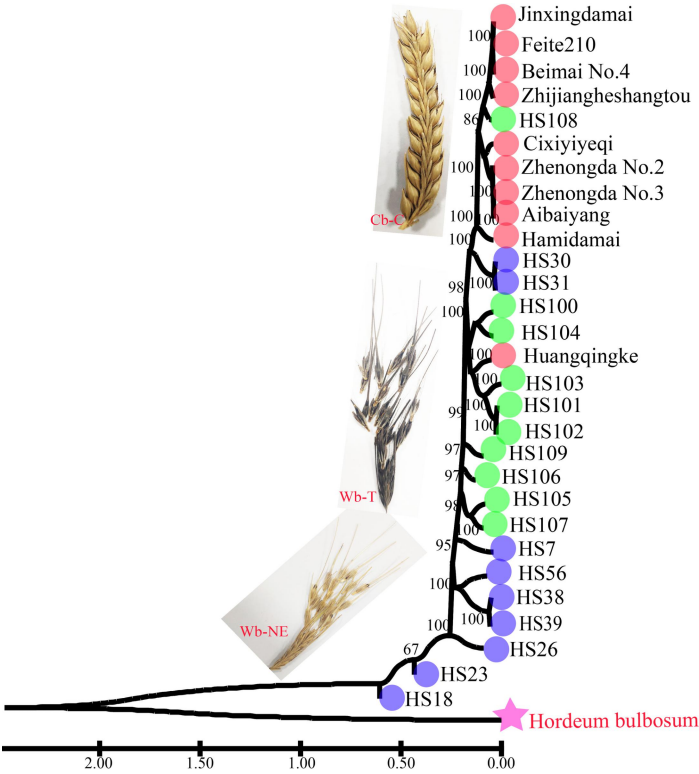

**Figure S2.** Original tree based on Tajima-Nei model. The tree was drawn to scale with branch lengths in the same units as those of the evolutionary distances used to infer the phylogenetic tree.

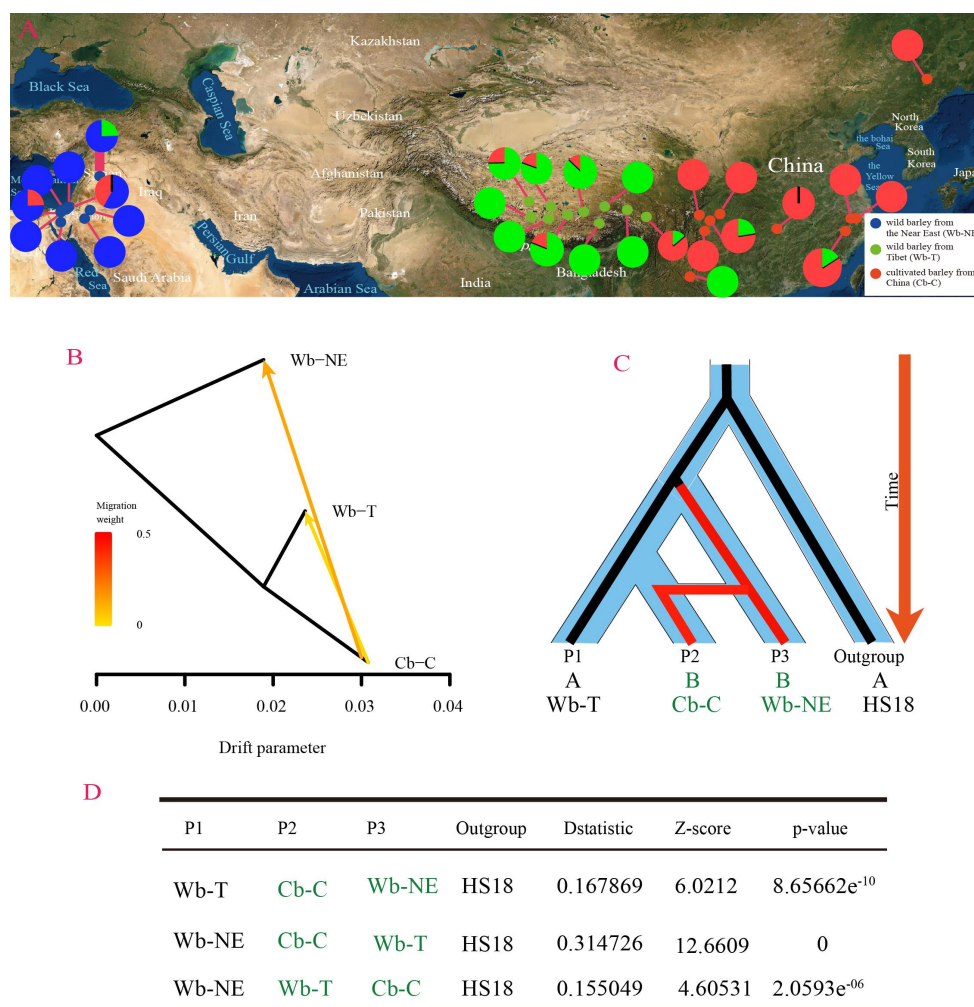

**Figure S3.** Gene flow between barley groups. Wb-NE, wild barley from the Near East Fertile Crescent. Wb-T, wild barley from Tibetan Plateau. Cb-C, cultivated barley from China. (A) Membership coefficient of each accession when  $K=3$ . The small red circles, small green circles and small blue circles denoted accessions of Cb-C, Wb-T and Wb-NE, respectively. The colors of the pie charts corresponded to the ADMIXTURE results with  $K=3$  in Figure 1B. The satellite map was provided by software ShuiJingWeiTu. (B) The maximum likelihood tree with two mixture event. (C) The optimal dtrios model based on the sets of 165,848 high-quality SNPs and HS18 as the outgroup revealed by software Dsuite (0.4 version). P1, P2 and P3 denoted the population 1, the population 2 and the population 3, respectively. (D) three trios model based on HS18 as the outgroup.

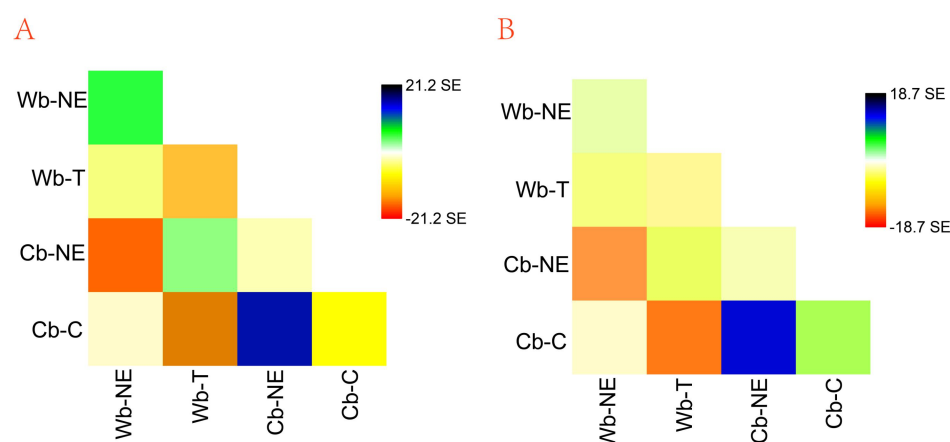

**Figure S4.** Residual likelihood plots of the maximum-likelihood trees for the four barley groups. Wb-NE, wild barley from the Near East Fertile Crescent. Wb-T, wild barley from Tibetan Plateau. Cb-C, cultivated barley from China. Cb-NE, cultivated barley from the Near East Fertile Crescent. (A) and (B) denoted residual likelihood plots when 0 and 1 migration events were allowed, respectively.

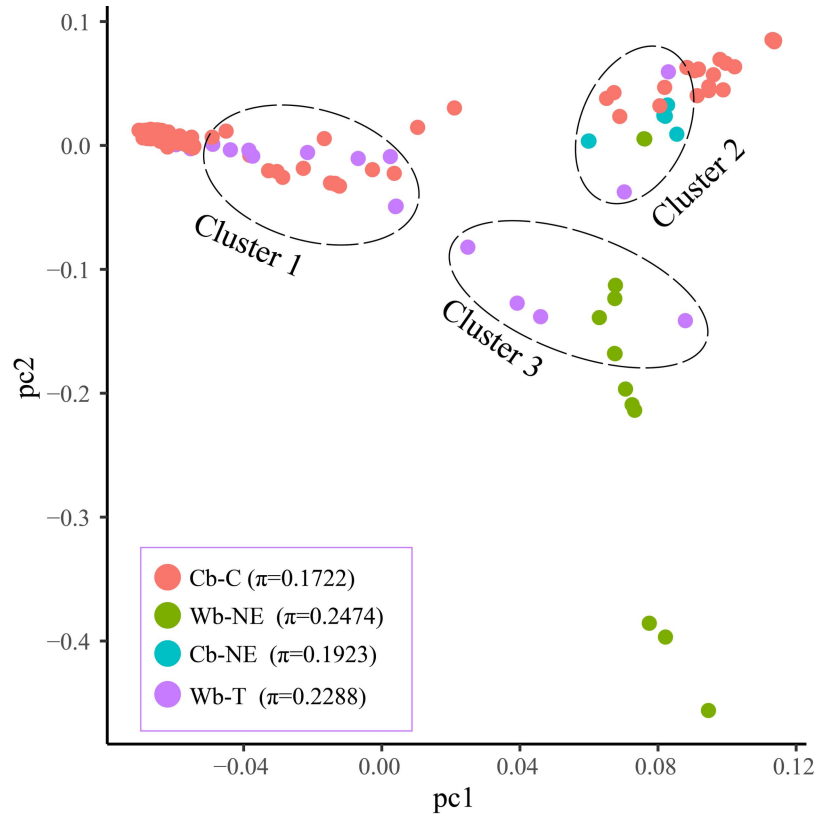

**Figure S5.** PCA scatter plot of the four barley groups. Wb-NE, wild barley from the Near East Fertile Crescent. Wb-T, wild barley from Tibetan Plateau. Cb-C, cultivated barley from China. Cb-NE, cultivated barley from the Near East Fertile Crescent. pc1, the first principal component. pc2, the second principal component. The Cluster 1, Cluster 2 and Cluster 3 showed close genetic relationship of Wb-T accessions with Cb-C, Cb-NE and Wb-NE, respectively.

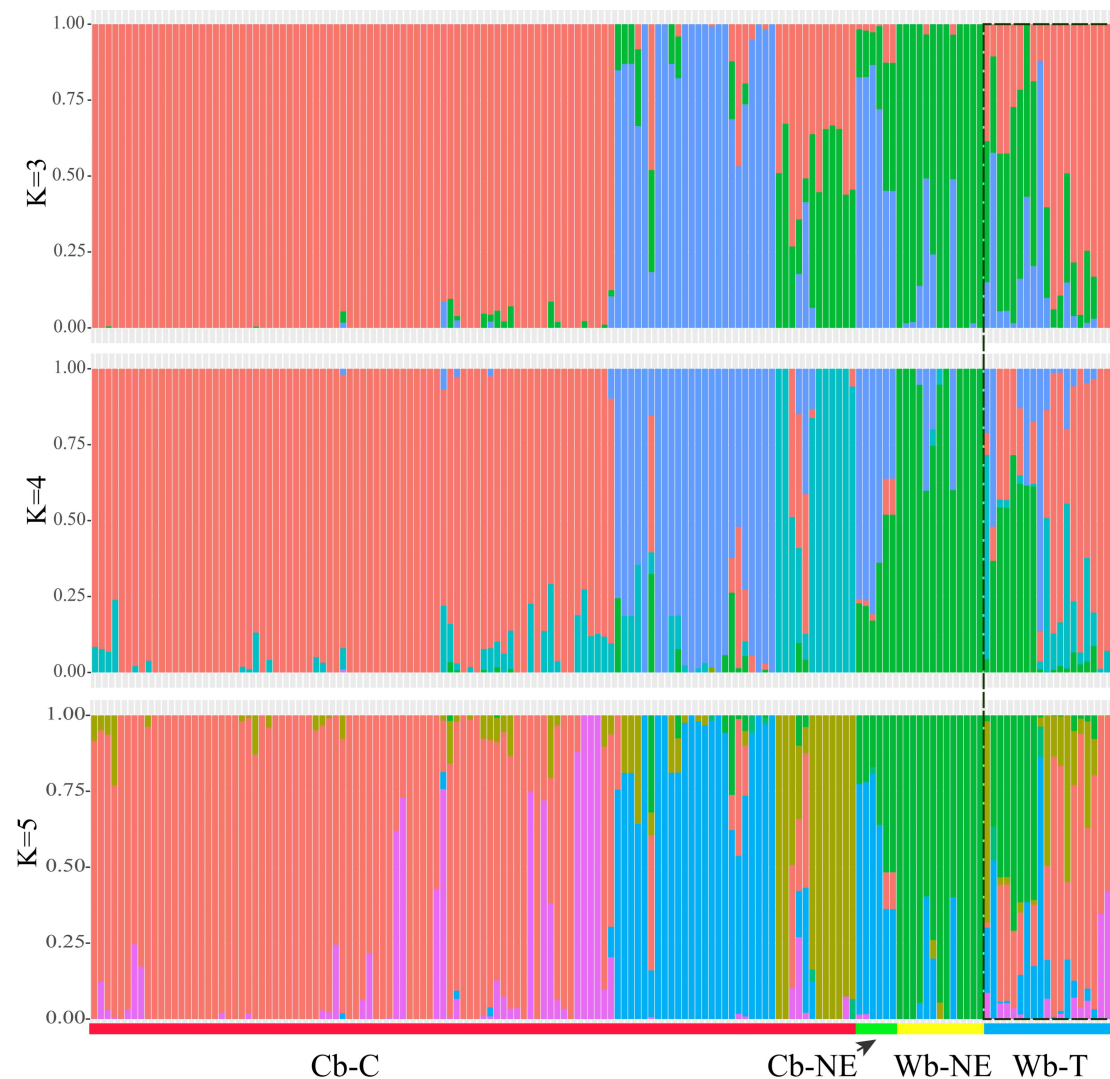

**Figure S6.** Population structure of the four barley groups. Wb-NE, wild barley from the Near East Fertile Crescent. Wb-T, wild barley from Tibetan Plateau. Cb-C, cultivated barley from China. Cb-NE, cultivated barley from the Near East Fertile Crescent.

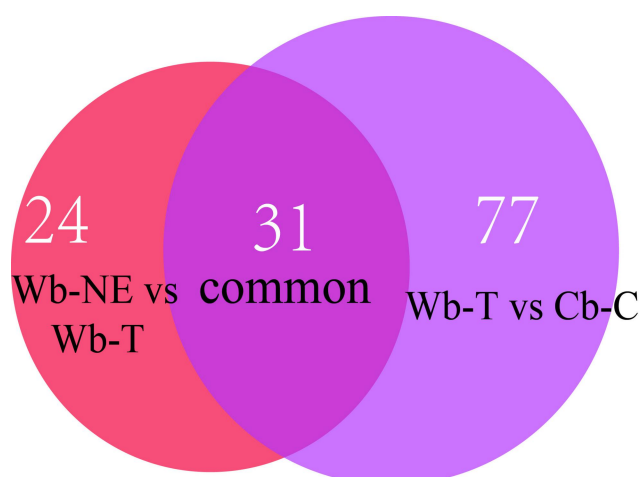

**Figure S7.** Venn diagrams of metabolites annotated by selection during two evolutionary stages.

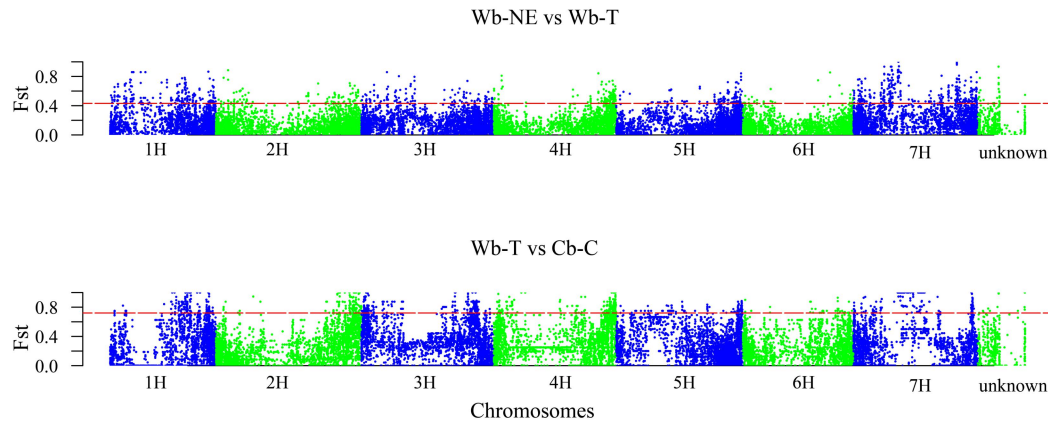

**Figure S8.** Positive selection signals in evolutionary stages from Wb-NE to Wb-T and from Wb-T to Cb-C. Wb-NE, wild barley from the Near East Fertile Crescent. Wb-T, wild barley from Tibetan Plateau. Cb-C, cultivated barley from China. Genome-wide distribution of genetic differentiation regions identified by *F<sub>st</sub>* analysis between Wb-NE and Wb-T, and between Wb-T and Cb-C, respectively. Each point indicated a weighted *F<sub>st</sub>* value with a 15-kb window. Red dotted lines indicated the thresholds of *F<sub>st</sub>* value (0.4314 in Wb-NE vs Wb-T and 0.7205 in Wb-T vs Cb-C) in the top 5% windows.

**Table S1.** Eight morphological traits of grain in three barley groups.

| Group | Grain area<br>(mm <sup>2</sup> ) | Grain perimeter<br>(mm) | Length width<br>ratio | Grain length<br>(mm) | Grain width<br>(mm) | Roundness<br>of grain | Density<br>factor<br>(mg/mm <sup>2</sup> ) | Grain<br>diameter<br>(mm) |
|-------|----------------------------------|-------------------------|-----------------------|----------------------|---------------------|-----------------------|--------------------------------------------|---------------------------|
| Wb-NE | 26.20 <sup>a</sup>               | 27.56 <sup>a</sup>      | 4.05 <sup>a</sup>     | 12.04 <sup>a</sup>   | 3.00 <sup>b</sup>   | 0.25 <sup>c</sup>     | 0.90 <sup>b</sup>                          | 5.74 <sup>a</sup>         |
| Wb-T  | 24.70 <sup>a</sup>               | 24.66 <sup>b</sup>      | 3.20 <sup>b</sup>     | 10.51 <sup>b</sup>   | 3.30 <sup>a</sup>   | 0.31 <sup>b</sup>     | 1.10 <sup>a</sup>                          | 5.57 <sup>a</sup>         |
| Cb-C  | 22.62 <sup>a</sup>               | 22.05 <sup>b</sup>      | 2.78 <sup>b</sup>     | 9.20 <sup>c</sup>    | 3.34 <sup>a</sup>   | 0.35 <sup>a</sup>     | 1.12 <sup>a</sup>                          | 5.35 <sup>a</sup>         |

Note: Wb-NE, wild barley from the Near East Fertile Crescent. Wb-T, wild barley from Tibetan Plateau. Cb-C, cultivated barley from China.

**Table S2.** Code, Taxon, Origin, Raw reads, Clean reads, Q20, Q30 and GC content of 29 barley accessions.

| Group | Accessions ID      | NCBI ID      | Code               | Taxon                     | Origin          | Raw reads  | Clean reads | Clean bases (G) | Q20(%) | Q30(%) | GC content (%) |
|-------|--------------------|--------------|--------------------|---------------------------|-----------------|------------|-------------|-----------------|--------|--------|----------------|
| Cb-C  | Aibaiyang          | SAMN20065704 | 381 (Aibaiyang)    | <i>Hordeum vulgare</i>    | Sichuan, China  | 44,167,002 | 43,963,564  | 5.99            | 97.95  | 94     | 55.14          |
|       | Cixiyiyeqi         | SAMN20065705 | 385 (Cixiyiyeqi)   | <i>Hordeum vulgare</i>    | Zhejiang, China | 43,699,046 | 43,500,878  | 7.14            | 97.99  | 94.14  | 53.94          |
|       | Beimai No.4        | SAMN20065706 | Beimai no.4        | <i>Hordeum vulgare</i>    | Jilin,China     | 43,103,444 | 42,838,678  | 5.95            | 97.68  | 93.57  | 55.56          |
|       | Huangqingke        | SAMN20065707 | Huangqingke        | <i>Hordeum vulgare</i>    | Yunnan,china    | 42937834   | 42,701,836  | 5.83            | 97.71  | 93.56  | 55.43          |
|       | Zhijiangheshangtou | SAMN20065708 | Zhijiangheshangtou | <i>Hordeum vulgare</i>    | Hunan, China    | 43,948,882 | 43,728,622  | 5.88            | 97.95  | 94.07  | 54.97          |
|       | Hamidamai          | SAMN20065709 | Hamidamai          | <i>Hordeum vulgare</i>    | Sichuan, China  | 43,537,552 | 43,343,810  | 5.96            | 98     | 94.18  | 54.93          |
|       | Jinxingdamai       | SAMN20065710 | Jinxingdamai       | <i>Hordeum vulgare</i>    | Sichuan, China  | 42,103,686 | 41,912,218  | 5.89            | 97.99  | 94.16  | 54.97          |
|       | Feite210           | SAMN20065711 | Feite210           | <i>Hordeum vulgare</i>    | Sichuan, China  | 45,487,962 | 45,251,466  | 5.67            | 97.82  | 93.71  | 54.41          |
|       | Zhenongda No.2     | SAMN20065712 | Zhenongda No.2     | <i>Hordeum vulgare</i>    | Zhejiang, China | 44,143,792 | 43,935,392  | 6.21            | 97.94  | 94.1   | 53.48          |
|       | Zhenongda No.3     | SAMN20065713 | Zhenongda No.3     | <i>Hordeum vulgare</i>    | Zhejiang, China | 52,555,774 | 52,302,084  | 5.87            | 97.92  | 94.06  | 53.81          |
| Wb-NE | HS7                | SAMN20065695 | PI236386           | <i>Hordeum spontaneum</i> | Syria           | 56,614,596 | 56,307,586  | 7.66            | 97.85  | 93.94  | 55.32          |
|       | HS18               | SAMN20065696 | PI284752           | <i>Hordeum spontaneum</i> | Israel          | 57,939,324 | 57,653,976  | 7.81            | 97.89  | 93.98  | 54.69          |
|       | HS23               | SAMN20065697 | PI296792           | <i>Hordeum spontaneum</i> | Israel          | 40,438,926 | 40,264,256  | 5.43            | 98.08  | 94.39  | 54.7           |
|       | HS26               | SAMN20065698 | PI296878           | <i>Hordeum spontaneum</i> | Israel          | 53,673,492 | 53,431,814  | 7.18            | 97.99  | 94.2   | 54.8           |
|       | HS30               | SAMN20065699 | PI356209           | <i>Hordeum spontaneum</i> | Israel          | 49,060,986 | 48,852,090  | 6.47            | 98.11  | 94.46  | 54.31          |
|       | HS31               | SAMN20065700 | PI391100           | <i>Hordeum spontaneum</i> | Israel          | 54,550,880 | 54,254,452  | 7.17            | 97.87  | 93.97  | 54.04          |
|       | HS38               | SAMN20065701 | PI420916           | <i>Hordeum spontaneum</i> | Jordan          | 42,894,626 | 42,672,602  | 5.81            | 97.88  | 93.98  | 55.02          |
|       | HS39               | SAMN20065702 | PI420917           | <i>Hordeum spontaneum</i> | Jordan          | 40,180,374 | 40,007,502  | 5.48            | 98.04  | 94.31  | 54.85          |
|       | HS56               | SAMN20065703 | PI466524           | <i>Hordeum spontaneum</i> | Israel          | 42,473,328 | 42,293,454  | 5.79            | 98.05  | 94.32  | 55.76          |
| Wb-T  | HS100              | SAMN20065685 | 01                 | <i>Hordeum spontaneum</i> | Tibet, China    | 42,180,230 | 41,971,336  | 5.66            | 97.94  | 94.13  | 54.91          |
|       | HS101              | SAMN20065686 | 03                 | <i>Hordeum spontaneum</i> | Tibet, China    | 47,238,978 | 46,998,118  | 6.35            | 97.93  | 94.1   | 55.19          |

|         |              |    |                           |              |               |               |       |       |       |       |
|---------|--------------|----|---------------------------|--------------|---------------|---------------|-------|-------|-------|-------|
| HS102   | SAMN20065687 | 04 | <i>Hordeum spontaneum</i> | Tibet, China | 54,444,286    | 54,135,064    | 7.31  | 97.73 | 93.67 | 56.25 |
| HS103   | SAMN20065688 | 13 | <i>Hordeum spontaneum</i> | Tibet, China | 50,074,954    | 49,815,964    | 6.78  | 97.91 | 94.07 | 55.17 |
| HS104   | SAMN20065689 | 18 | <i>Hordeum spontaneum</i> | Tibet, China | 57,520,602    | 57,239,464    | 7.87  | 97.91 | 94    | 54.07 |
| HS105   | SAMN20065690 | 22 | <i>Hordeum spontaneum</i> | Tibet, China | 47,252,228    | 47,025,550    | 6.32  | 98.01 | 94.29 | 55.32 |
| HS106   | SAMN20065691 | 23 | <i>Hordeum spontaneum</i> | Tibet, China | 43,197,490    | 42,989,676    | 5.87  | 97.89 | 93.9  | 54.86 |
| HS107   | SAMN20065692 | 26 | <i>Hordeum spontaneum</i> | Tibet, China | 41,936,398    | 41,676,472    | 5.64  | 97.67 | 93.53 | 54.97 |
| HS108   | SAMN20065693 | 27 | <i>Hordeum spontaneum</i> | Tibet, China | 43,112,326    | 42,918,498    | 5.82  | 97.96 | 94.13 | 56.31 |
| HS109   | SAMN20065694 | 28 | <i>Hordeum spontaneum</i> | Tibet, China | 65,689,076    | 65,320,088    | 8.79  | 97.88 | 94.01 | 55.89 |
| Sum     |              | -  | -                         |              | 1,376,158,074 | 1,369,306,510 | 185.6 | -     | -     | -     |
| Average |              | -  | -                         |              | 45,871,935.80 | 45,643,550.30 | 6.19  | -     | -     | -     |

Note: Wb-NE, wild barley from the Near East Fertile Crescent. Wb-T, wild barley from Tibetan Plateau. Cb-C, cultivated barley from China.

**Table S3.** The optimal number of population structure judged by admixture software.

| K | CV error |
|---|----------|
| 2 | 0.82365  |
| 3 | 0.83402  |
| 4 | 0.95663  |

**Table S4.** The 8,828 non redundant metabolites (See “Table S4.xls” for detail).

**Table S5.** Metabolites had annotated structure.

| Metabolite ID | Classification            | Description                        | KEGG.ID |
|---------------|---------------------------|------------------------------------|---------|
| M166T177      | Alkaloid                  | Hordeanine                         | C06199  |
| M152T230      | Alkaloid                  | N-Methyltyramine                   |         |
| M163T79       | Alkaloid                  | Nicotine                           | C00745  |
| M159T178      | Amines                    | Allantoin                          | C01551  |
| M157T181      | Amines                    | Allantoin                          | C01551  |
| M131T401      | Amines                    | Agmatine                           | C00179  |
| M177T242      | Amines                    | Serotonin                          | C00780  |
| M150T167      | Amines                    | Triethanolamine                    | C06771  |
| M102T335      | Amines                    | Betaine aldehyde                   | C00576  |
| M104T405      | Amines                    | Choline                            | C00114  |
| M100T59       | Amines                    | Cyclohexylamine                    | C00571  |
| M184T496      | Amines                    | Phosphorylcholine                  | C00588  |
| M318T162      | Amines                    | Phytosphingosine                   | C12144  |
| M242T389      | Amines                    | Phosphorylcholine                  | C00588  |
| M118T2722     | Amines                    | Betaine                            | C00719  |
| M136T299      | Amines                    | Dopamine                           | C03758  |
| M152T100      | Amines                    | Norepinephrine                     | C00547  |
| M138T234      | Amines                    | Tyramine                           | C00483  |
| M148T92       | Amino acid and derivative | O-Acetyl-L-serine                  | C00979  |
| M232T452      | Amino acid and derivative | N- (omega) -Hydroxyarginine        | C05933  |
| M143T240      | Amino acid and derivative | N6-Methyl-L-lysine                 | C02728  |
| M193T84       | Amino acid and derivative | N-Methylantranilic Acid            |         |
| M205T258      | Amino acid and derivative | L-Tryptophan                       | C00078  |
| M203T258      | Amino acid and derivative | L-Tryptophan                       | C00078  |
| M116T309      | Amino acid and derivative | D-Proline                          | C00763  |
| M134T392      | Amino acid and derivative | L-Aspartate                        | C00049  |
| M102T513      | Amino acid and derivative | 1-Aminocyclopropanecarboxylic acid | C01234  |
| M201T335      | Amino acid and derivative | 5-L-Glutamyl-L-alanine             | C03740  |
| M161T316      | Amino acid and derivative | D-Alanyl-D-alanine (D-Ala-D-Ala)   | C00993  |
| M166T366      | Amino acid and derivative | DL-Methionine sulfoxide            | C02989  |
| M308T393      | Amino acid and derivative | Glutathione                        | C00051  |
| M613T481      | Amino acid and derivative | Glutathione disulfide              | C00127  |
| M175T529      | Amino acid and derivative | L-Arginine                         | C00062  |
| M176T391      | Amino acid and derivative | L-Citrulline                       | C00327  |
| M148T386      | Amino acid and derivative | L-Glutamate                        | C00025  |
| M156T450      | Amino acid and derivative | L-Histidine                        | C00135  |
| M132T168      | Amino acid and derivative | L-Leucine                          | C00123  |
| M106T375      | Amino acid and derivative | L-Serine                           | C00065  |
| M189T544      | Amino acid and derivative | N6,N6,N6-Trimethyl-L-lysine        | C03793  |
| M203T512      | Amino acid and derivative | NG,NG-dimethyl-L-arginine (ADMA)   | C03626  |

|            |                           |                                           |        |
|------------|---------------------------|-------------------------------------------|--------|
| M132T392   | Amino acid and derivative | D-Aspartic acid                           | C00402 |
| M178T36    | Amino acid and derivative | 3,4-Dihydroxy-L-phenylalanine<br>(L-DOPA) | C00355 |
| M172T318   | Amino acid and derivative | Acetyl-DL-Leucine                         | C02710 |
| M175T346   | Amino acid and derivative | Allantoate/Allantoic acid                 | C00499 |
| M159T317   | Amino acid and derivative | D-Alanyl-D-alanine (D-Ala-D-Ala)          | C00993 |
| M275T439   | Amino acid and derivative | gamma-L-Glutamyl-L-glutamic acid          | C05282 |
| M245T365   | Amino acid and derivative | gamma-L-Glutamyl-L-valine                 | C03740 |
| M88T345    | Amino acid and derivative | L-Alanine                                 | C00041 |
| M146T385   | Amino acid and derivative | L-Glutamate                               | C00025 |
| M145T371   | Amino acid and derivative | L-Glutamine                               | C00064 |
| M130T272   | Amino acid and derivative | L-Isoleucine                              | C00407 |
| M128T307   | Amino acid and derivative | L-Pipecolic acid                          | C00408 |
| M114T310   | Amino acid and derivative | L-Proline                                 | C00148 |
| M104T375   | Amino acid and derivative | L-Serine                                  | C00065 |
| M116T299   | Amino acid and derivative | L-Valine                                  | C00183 |
| M130T363   | Amino acid and derivative | N-Acetyl-L-alanine                        |        |
| M188T371   | Amino acid and derivative | N-Acetyl-L-glutamate                      | C00624 |
| M206T307   | Amino acid and derivative | N-Acetyl-L-phenylalanine                  | C03519 |
| M133T374   | Amino acid and derivative | L-Asparagine                              | C00152 |
| M120T365   | Amino acid and derivative | L-Threonine                               | C00188 |
| M182T299   | Amino acid and derivative | L-Tyrosine                                | C00082 |
| M131T374   | Amino acid and derivative | L-Asparagine                              | C00152 |
| M118T352   | Amino acid and derivative | L-Threonine                               | C00188 |
| M217T370   | Amino acid and derivative | N-.alpha.-Acetyl-L-arginine               |        |
| M158T335   | Amino acid and derivative | Acetyl-DL-Valine                          |        |
| M215T371   | Amino acid and derivative | N-.alpha.-Acetyl-L-arginine               |        |
| M190T189   | Amino acid and derivative | N-Acetyl-DL-methionine                    |        |
| M218T446   | Amino acid and derivative | Ala-Lys                                   |        |
| M246T426   | Amino acid and derivative | Arg-Ala                                   |        |
| M219T262   | Amino acid and derivative | Ser-Ile                                   |        |
| M219T399   | Amino acid and derivative | Ala-Glu                                   |        |
| M203T258_2 | Amino acid and derivative | Ala-Leu                                   |        |
| M237T197   | Amino acid and derivative | Ala-Phe                                   |        |
| M189T279   | Amino acid and derivative | Ala-Val                                   |        |
| M304T443   | Amino acid and derivative | Arg-Glu                                   |        |
| M274T384   | Amino acid and derivative | Arg-Val                                   |        |
| M280T332   | Amino acid and derivative | Asn-Phe                                   |        |
| M269T292   | Amino acid and derivative | His-Ile                                   |        |
| M203T227   | Amino acid and derivative | Ile-Ala                                   |        |
| M288T337   | Amino acid and derivative | Ile-Arg                                   |        |
| M246T300   | Amino acid and derivative | Ile-Asn                                   |        |

|          |                           |            |  |
|----------|---------------------------|------------|--|
| M245T178 | Amino acid and derivative | Ile-Ile    |  |
| M279T169 | Amino acid and derivative | Ile-Phe    |  |
| M229T241 | Amino acid and derivative | Ile-Pro    |  |
| M260T281 | Amino acid and derivative | Ile-Ser    |  |
| M233T222 | Amino acid and derivative | Ile-Thr    |  |
| M318T176 | Amino acid and derivative | Ile-Trp    |  |
| M260T361 | Amino acid and derivative | Leu-Lys    |  |
| M262T448 | Amino acid and derivative | Lys-Asp    |  |
| M557T304 | Amino acid and derivative | Lys-Leu    |  |
| M234T444 | Amino acid and derivative | Lys-Ser    |  |
| M248T444 | Amino acid and derivative | Lys-Thr    |  |
| M246T403 | Amino acid and derivative | Lys-Val    |  |
| M322T313 | Amino acid and derivative | Phe-Arg    |  |
| M281T332 | Amino acid and derivative | Phe-Asp    |  |
| M294T254 | Amino acid and derivative | Phe-Gln    |  |
| M253T238 | Amino acid and derivative | Phe-Ser    |  |
| M265T176 | Amino acid and derivative | Phe-Val    |  |
| M287T137 | Amino acid and derivative | Prilocaine |  |
| M187T335 | Amino acid and derivative | Pro-Ala    |  |
| M272T415 | Amino acid and derivative | Pro-Arg    |  |
| M245T407 | Amino acid and derivative | Pro-Glu    |  |
| M177T321 | Amino acid and derivative | Ser-Ala    |  |
| M303T445 | Amino acid and derivative | Ser-Arg    |  |
| M235T418 | Amino acid and derivative | Ser-Glu    |  |
| M207T326 | Amino acid and derivative | Ser-Thr    |  |
| M269T285 | Amino acid and derivative | Ser-Tyr    |  |
| M205T286 | Amino acid and derivative | Ser-Val    |  |
| M191T306 | Amino acid and derivative | Thr-Ala    |  |
| M249T389 | Amino acid and derivative | Thr-Glu    |  |
| M233T241 | Amino acid and derivative | Thr-Leu    |  |
| M248T427 | Amino acid and derivative | Thr-Lys    |  |
| M267T220 | Amino acid and derivative | Thr-Phe    |  |
| M221T310 | Amino acid and derivative | Thr-Thr    |  |
| M386T155 | Amino acid and derivative | Tyr-Gln    |  |
| M295T196 | Amino acid and derivative | Tyr-Ile    |  |
| M330T255 | Amino acid and derivative | Tyr-Met    |  |
| M283T95  | Amino acid and derivative | Tyr-Thr    |  |
| M281T209 | Amino acid and derivative | Tyr-Val    |  |
| M189T255 | Amino acid and derivative | Val-Ala    |  |
| M274T363 | Amino acid and derivative | Val-Arg    |  |
| M232T318 | Amino acid and derivative | Val-Asn    |  |
| M246T274 | Amino acid and derivative | Val-Gln    |  |

|          |                           |                                |               |
|----------|---------------------------|--------------------------------|---------------|
| M247T366 | Amino acid and derivative | Val-Glu                        |               |
| M231T192 | Amino acid and derivative | Val-Ile                        |               |
| M219T368 | Amino acid and derivative | Val-Thr                        |               |
| M298T499 | Amino acid and derivative | Val-Tyr                        |               |
| M217T206 | Amino acid and derivative | Val-Val                        |               |
| M317T32  | Amino acid and derivative | Zearalenone                    | C09981        |
| M93T210  | Amino acid and derivative | Phenol                         | C00146/C15584 |
| M403T52  | Amino acid and derivative | (-) -Usnic acid                |               |
| M219T19  | Amino acid and derivative | BHT                            |               |
| M160T77  | Carboxylic Acids          | Indole-3-carboxylic acid       | C19837        |
| M133T517 | Carboxylic Acids          | L-Malic acid                   | C00149        |
| M147T539 | Carboxylic Acids          | D-Pipecolinic acid             |               |
| M187T303 | Carboxylic Acids          | alpha-N-Acetyl-L-glutamine     |               |
| M103T258 | Carboxylic Acids          | Malonic acid                   | C00383        |
| M121T173 | Carboxylic Acids          | Urocanic acid                  | C00785        |
| M135T319 | Carboxylic Acids          | L-Threonate                    | C01620        |
| M191T327 | Carboxylic Acids          | Quinate                        | C00296        |
| M173T344 | Carboxylic Acids          | Shikimate                      | C00493        |
| M104T374 | Carboxylic Acids          | 4-Aminobutyric acid            | C00334        |
| M149T292 | Carboxylic Acids          | Dihydroxyfumarate              | C00975        |
| M173T262 | Carboxylic Acids          | L-Norleucine                   | C01933        |
| M147T418 | Carboxylic Acids          | L-Pyroglutamic acid            | C01879        |
| M89T301  | Carboxylic Acids          | DL-lactate                     | C00256/C00186 |
| M141T381 | Carboxylic Acids          | 2-Oxoadipic acid               | C00322        |
| M173T413 | Carboxylic Acids          | cis-Aconitate                  | C00417        |
| M191T499 | Carboxylic Acids          | Isocitrate                     | C00311        |
| M128T289 | Carboxylic Acids          | L-Pyroglutamic acid            | C01879        |
| M137T386 | Carboxylic Acids          | Maleic acid                    | C01384        |
| M117T180 | Carboxylic Acids          | Methylmalonic acid             | C02170        |
| M117T369 | Carboxylic Acids          | Succinate                      | C00042        |
| M118T88  | Carboxylic Acids          | 2-Methyl-3-hydroxybutyric acid |               |
| M175T311 | Carboxylic Acids          | 2-Isopropylmalic acid          | C02504        |
| M235T103 | Carboxylic Acids          | 3-Hydroxyisovaleric acid       |               |
| M187T328 | Carboxylic Acids          | Azelaic acid                   | C08261        |
| M147T335 | Carboxylic Acids          | Citramalic acid                | C00815        |
| M129T442 | Carboxylic Acids          | Mesaconic acid                 | C01732        |
| M295T103 | Carboxylic Acids          | Mevalonic acid                 | C00418        |
| M136T286 | Carboxylic Acids          | Anthranilic acid (Vitamin L1)  | C00108        |
| M162T398 | Carboxylic Acids          | DL-2-Aminoadipic acid          | C00956        |
| M160T397 | Carboxylic Acids          | DL-2-Aminoadipic acid          | C00956        |
| M149T31  | Carboxylic Acids          | 1,2-Benzenedicarboxylic acid   |               |
| M101T371 | Carboxylic Acids          | DL-2,4-Diaminobutyric acid     |               |

|          |                  |                                                        |        |
|----------|------------------|--------------------------------------------------------|--------|
| M176T269 | Carboxylic Acids | N-Carboxyethyl-.gamma.-aminobutyric acid               |        |
| M171T268 | Carboxylic Acids | 3-Dehydroshikimic acid                                 |        |
| M114T374 | Carboxylic Acids | Maleamic acid                                          |        |
| M383T327 | Carboxylic Acids | Quinic acid                                            |        |
| M298T284 | Glycosides       | 8-hydroxy Guanosine                                    |        |
| M282T294 | Glycosides       | 1-Methyladenosine                                      | C02494 |
| M298T319 | Glycosides       | 1-methylguanosine                                      |        |
| M364T428 | Glycosides       | 3'-O-methylguanosine                                   |        |
| M346T312 | Glycosides       | 3',5'-Cyclic guanosine monophosphate                   | C00942 |
| M268T167 | Glycosides       | Adenosine                                              | C00212 |
| M244T238 | Glycosides       | Cytidine                                               | C00475 |
| M306T311 | Glycosides       | Cytidine 5'-monophosphate (CMP)                        | C00055 |
| M284T260 | Glycosides       | Guanosine                                              | C00387 |
| M282T129 | Glycosides       | N6-methyladenosine                                     |        |
| M298T98  | Glycosides       | S-Methyl-5'-thioadenosine                              | C00170 |
| M245T157 | Glycosides       | Uridine                                                | C00299 |
| M344T313 | Glycosides       | 3',5'-Cyclic guanosine monophosphate                   | C00942 |
| M282T260 | Glycosides       | Guanosine                                              | C00387 |
| M267T213 | Glycosides       | Inosine                                                | C00294 |
| M257T140 | Glycosides       | Ribothymidine                                          |        |
| M303T158 | Glycosides       | Uridine                                                | C00299 |
| M323T402 | Glycosides       | Uridine 5'-monophosphate (UMP)                         | C00105 |
| M362T427 | Glycosides       | Guanosine 5'-monophosphate (GMP)                       | C00144 |
| M549T388 | Glycosides       | Gemcitabine                                            |        |
| M336T68  | Glycosides       | Isopentenyladenosine                                   |        |
| M454T201 | Lipids           | 1-Palmitoyl-2-hydroxy-sn-glycero-3-phosphoethanolamine |        |
| M330T39  | Lipids           | Eicosapentaenoic Acid ethyl ester                      |        |
| M748T78  | Lipids           | 1-Palmitoyl-2-oleoyl-phosphatidylglycerol              |        |
| M355T113 | Lipids           | 5-Oxo-ETE                                              |        |
| M452T201 | Lipids           | 1-Palmitoyl-2-hydroxy-sn-glycero-3-phosphoethanolamine |        |
| M357T261 | Lipids           | 5 (S) -HpETE                                           |        |
| M339T31  | Lipids           | Norethindrone Acetate                                  |        |
| M275T56  | Lipids           | Stearidonic Acid                                       |        |
| M263T342 | Lipids           | Linoleic acid                                          | C01595 |
| M255T45  | Lipids           | Palmitic acid                                          | C00249 |
| M283T44  | Lipids           | Stearic acid                                           | C01530 |
| M311T43  | Lipids           | Arachidic acid                                         | C06425 |
| M339T402 | Lipids           | Behenic acid                                           | C08281 |
| M253T37  | Lipids           | cis-9-Palmitoleic acid                                 | C08362 |
| M269T442 | Lipids           | Heptadecanoic acid                                     |        |

|           |                              |                                                                          |        |
|-----------|------------------------------|--------------------------------------------------------------------------|--------|
| M227T46   | Lipids                       | Myristic acid                                                            | C06424 |
| M281T101  | Lipids                       | Oleic acid                                                               | C00712 |
| M313T158  | Lipids                       | 1-Palmitoylglycerol                                                      |        |
| M343T34   | Lipids                       | 20-Hydroxyarachidonic acid                                               |        |
| M338T2    | Lipids                       | Erucamide                                                                |        |
| M337T244  | Lipids                       | MG (18:2 (9Z,12Z) /0:0/0:0) [rac]                                        |        |
| M277T45   | Lipids                       | all cis- (6,9,12) -Linolenic acid                                        | C06426 |
| M787T147  | Lipids                       | 1,2-dioleoyl-sn-glycero-3-phosphatidylcholine                            |        |
| M819T136  | Lipids                       | 2-Oleoyl-1-palmitoyl-sn-glycero-3-phosphocholine (PC (16:0/18:1 (9Z) ) ) |        |
| M152T2602 | Nucleic acids and derivative | 2-Hydroxyadenine                                                         |        |
| M112T237  | Nucleic acids and derivative | Cytosine                                                                 | C00380 |
| M137T213  | Nucleic acids and derivative | Hypoxanthine                                                             | C00262 |
| M113T158  | Nucleic acids and derivative | Uracil                                                                   | C00106 |
| M127T372  | Nucleic acids and derivative | Dihydrothymine                                                           | C00906 |
| M113T374  | Nucleic acids and derivative | Dihydrouracil                                                            | C00429 |
| M111T159  | Nucleic acids and derivative | Uracil                                                                   | C00106 |
| M282T92   | Nucleic acids and derivative | 2'-O-methyladenosine                                                     | C04779 |
| M348T398  | Nucleic acids and derivative | 3'-O-methyladenosine                                                     |        |
| M330T253  | Nucleic acids and derivative | Adenosine 2',3'-cyclic monophosphate                                     | C02353 |
| M611T311  | Nucleic acids and derivative | Cytidine 2',3'-cyclic phosphate                                          | C02354 |
| M328T256  | Nucleic acids and derivative | Adenosine 3',5'-cyclic phosphate (cAMP)                                  | C00575 |
| M304T312  | Nucleic acids and derivative | Cytidine 2',3'-cyclic phosphate                                          | C02354 |
| M323T423  | Nucleic acids and derivative | 5'-CMP                                                                   |        |
| M258T404  | Nucleic acids and derivative | D-Glucosamine 1-phosphate (Glucosamine-1P)                               | C06156 |
| M136T99   | Nucleic acids and derivative | Adenine                                                                  | C00147 |
| M324T424  | Nucleic acids and derivative | 3'-O-methyleytidine                                                      |        |
| M277T363  | Other                        | 2-C-Methyl-D-erythritol 2,4-cyclodiphosphate                             |        |
| M145T364  | Other                        | Pyruvaldehyde                                                            | C00546 |
| M133T181  | Other                        | Ribitol                                                                  | C00474 |
| M233T33   | Other                        | Confertifoline                                                           |        |
| M72T446   | Other                        | Pyrrolidine                                                              |        |
| M325T415  | Other                        | 3.alpha.-Mannobiose                                                      |        |
| M391T247  | Other                        | RU-0211                                                                  |        |
| M213T1041 | Other                        | m-Chlorohippuric acid                                                    |        |
| M173T72   | Other                        | Lawsone                                                                  |        |
| M241T59   | Other                        | Lumichrome                                                               | C01727 |
| M327T212  | Other                        | Coumestrol                                                               |        |
| M146T267  | Other                        | Oxyquinoline                                                             |        |

|           |                      |                                                  |                          |
|-----------|----------------------|--------------------------------------------------|--------------------------|
| M867T79   | Other                | Dioscin                                          |                          |
| M329T100  | Other                | Acetylvalerenolic acid                           |                          |
| M128T386  | Other                | Ammelide                                         |                          |
| M129T259  | Other                | Cyanuric acid                                    |                          |
| M301T23   | Other                | Diosmetin                                        |                          |
| M147T299  | Phenylpropanoids     | 4-Hydroxycinnamic acid                           | C00811                   |
| M565T212  | Phenylpropanoids     | Apiin                                            | C04858                   |
| M163T54   | Phenylpropanoids     | 4-Hydroxycinnamic acid                           | C00811                   |
| M563T213  | Phenylpropanoids     | APIIN                                            | C04858                   |
| M166T256  | Phenylpropanoids     | L-Phenylalanine                                  | C00079                   |
| M164T256  | Phenylpropanoids     | L-Phenylalanine                                  | C00079                   |
| M173T181  | Plant hormone        | 3-Methylindole                                   | C08313                   |
| M118T165  | Plant hormone        | Indole                                           | C00463                   |
| M173T182  | Plant hormone        | 1-Methyltryptamine                               | C06213                   |
| M188T258  | Plant hormone        | DL-Indole-3-lactic acid                          |                          |
| M87T374   | Plant hormone        | 4-Hydroxybutanoic acid lactone                   |                          |
| M323T295  | Plant hormone        | Beta-d-lactose                                   |                          |
| M147T76   | Plant hormone        | D-Arabinono-1,4-lactone                          |                          |
| M220T117  | Plant hormone        | trans-Zeatin                                     | C00371                   |
| M170T258  | Plant hormone        | Indoleacrylic acid                               |                          |
| M89T260   | Sugar and derivative | Dihydroxyacetone                                 | C00184                   |
| M147T180  | Sugar and derivative | Hydroxyacetone                                   | C05235                   |
| M359T2592 | Sugar and derivative | D-Fructose                                       | C00095/C05003/<br>C10906 |
| M191T109  | Sugar and derivative | D-Galactarate                                    | C00879                   |
| M255T261  | Sugar and derivative | D-gluconate                                      | C00257                   |
| M105T293  | Sugar and derivative | Glyceric acid                                    | C00258                   |
| M195T373  | Sugar and derivative | Galactonic acid                                  | C00880                   |
| M177T181  | Sugar and derivative | D-Glucono-1,5-lactone                            | C00198                   |
| M237T356  | Sugar and derivative | 2-Dehydro-3-deoxy-D-gluconate                    | C00204                   |
| M757T39   | Sugar and derivative | PC (16:0/16:0)                                   | C00157                   |
| M173T334  | Sugar and derivative | Glycerol 3-phosphate                             | C00093                   |
| M258T389  | Sugar and derivative | Glycerophosphocholine                            | C00670                   |
| M153T261  | Sugar and derivative | Glycerol 3-phosphate                             | C00093                   |
| M216T394  | Sugar and derivative | sn-Glycerol 3-phosphoethanolamine                | C01233                   |
| M759T391  | Sugar and derivative | Thioetheramide-PC                                |                          |
| M522T189  | Sugar and derivative | 1-Oleoyl-sn-glycero-3-phosphocholine             |                          |
| M496T196  | Sugar and derivative | 1-Palmitoyl-sn-glycero-3-phosphocholine          |                          |
| M524T192  | Sugar and derivative | 1-Stearoyl-2-hydroxy-sn-glycero-3-phosphocholine |                          |
| M435T243  | Sugar and derivative | 1-Oleoyl-L-.alpha.-lysophosphatidic acid         |                          |
| M409T251  | Sugar and derivative | 1-Palmitoyl Lysophosphatidic Acid                |                          |
| M343T406  | Sugar and derivative | Maltitol                                         |                          |

|            |                      |                                   |        |
|------------|----------------------|-----------------------------------|--------|
| M259T448   | Sugar and derivative | alpha-D-Galactose 1-phosphate     | C00446 |
| M259T470   | Sugar and derivative | alpha-D-Glucose 1-phosphate       | C00103 |
| M297T469_2 | Sugar and derivative | Beta-D-Fructose 6-phosphate       | C05345 |
| M177T105   | Sugar and derivative | L-Gulonic gamma-lactone           | C01040 |
| M327T250   | Sugar and derivative | D-Quinovose                       | C02522 |
| M149T290   | Sugar and derivative | L-Ribulose                        |        |
| M383T258   | Sugar and derivative | N-Acetyl-D-lactosamine            |        |
| M261T464   | Sugar and derivative | alpha-D-Glucose 1-phosphate       | C00103 |
| M343T445   | Sugar and derivative | D-Lactose                         | C00243 |
| M505T445   | Sugar and derivative | Raffinose                         | C00492 |
| M667T485   | Sugar and derivative | Stachyose                         | C01613 |
| M360T437   | Sugar and derivative | Sucrose                           | C00089 |
| M179T260   | Sugar and derivative | Alpha-D-Glucose                   | C00267 |
| M193T311   | Sugar and derivative | 2'-Deoxy-D-ribose                 | C01801 |
| M341T463   | Sugar and derivative | Cellobiose                        | C00185 |
| M341T414   | Sugar and derivative | D-Lactose                         | C00243 |
| M239T301   | Sugar and derivative | D-Mannose                         | C00159 |
| M223T255   | Sugar and derivative | L-Fucose                          | C01019 |
| M503T425   | Sugar and derivative | Melezitose                        | C08243 |
| M151T228   | Sugar and derivative | Xylitol                           | C00379 |
| M198T259   | Sugar and derivative | D-Mannose                         | C00159 |
| M243T387   | Sugar and derivative | D-Mannose-6-phosphate             | C00275 |
| M360T389   | Sugar and derivative | Isomaltose                        | C00252 |
| M522T425   | Sugar and derivative | Maltotriose                       | C01835 |
| M401T389   | Sugar and derivative | Galactinol                        | C01235 |
| M300T432   | Sugar and derivative | N-Acetylglucosamine 1-phosphate   | C04256 |
| M503T445   | Sugar and derivative | Raffinose                         | C00492 |
| M665T485   | Sugar and derivative | Stachyose                         | C01613 |
| M341T363   | Sugar and derivative | Sucrose                           | C00089 |
| M341T389   | Sugar and derivative | Trehalose                         | C01083 |
| M579T206   | Sugar and derivative | Apigenin 7-O-neohesperidoside     |        |
| M149T151   | Sugar and derivative | D-Lyxose                          | C00476 |
| M193T182   | Sugar and derivative | Perseitol                         |        |
| M124T206   | Vitamins             | Nicotinate                        | C00253 |
| M123T59    | Vitamins             | Nicotinamide                      | C00153 |
| M168T91    | Vitamins             | Pyridoxal (Vitamin B6)            | C00250 |
| M265T369   | Vitamins             | Thiamine                          | C00378 |
| M122T207   | Vitamins             | Nicotinate                        | C00253 |
| M375T210   | Vitamins             | Riboflavin                        | C00255 |
| M786T382   | Vitamins             | Flavin adenine dinucleotide (FAD) | C00016 |
| M220T258   | Vitamins             | Pantothenate                      | C00864 |
| M218T2612  | Vitamins             | Pantothenate                      | C00864 |

|          |          |                 |        |
|----------|----------|-----------------|--------|
| M170T101 | Vitamins | Pyridoxine      | C00314 |
| M175T54  | Vitamins | L-Ascorbic acid | C00072 |

**Table S6.** Divergent metabolites between Wb-NE and Wb-T.

| Metabolism | Qst         |             |               |
|------------|-------------|-------------|---------------|
|            | 0.05%       | 99.50%      | Estimated Qst |
| M454T201   | 0.865288982 | 0.994603238 | 0.923953506   |
| M633T37    | 0.8456384   | 0.993599597 | 0.910601158   |
| M379T204   | 0.832029728 | 0.99286139  | 0.900926142   |
| M251T186   | 0.831107127 | 0.992809975 | 0.900256821   |
| M465T154   | 0.829386106 | 0.992713585 | 0.899003573   |
| M483T154   | 0.826444959 | 0.992547261 | 0.896845244   |
| M307T203   | 0.82639634  | 0.992544626 | 0.896811671   |
| M481T40    | 0.822179295 | 0.992303019 | 0.893688241   |
| M480T196   | 0.81740926  | 0.99202494  | 0.89010893    |
| M398T203   | 0.812771262 | 0.991749545 | 0.886580567   |
| M363T203   | 0.807569424 | 0.991434595 | 0.882565208   |
| M447T154   | 0.807561003 | 0.991434078 | 0.882558632   |
| M365T285   | 0.807541656 | 0.991432893 | 0.882543559   |
| M481T153   | 0.80652227  | 0.99137038  | 0.881749019   |
| M554T196   | 0.806514185 | 0.991369902 | 0.881743023   |
| M522T189   | 0.799950499 | 0.990961248 | 0.876569674   |
| M553T93    | 0.793830584 | 0.990570205 | 0.871651732   |
| M496T196   | 0.791507767 | 0.990419162 | 0.869760539   |
| M483T37    | 0.791007832 | 0.990386462 | 0.869351728   |
| M311T154   | 0.783926746 | 0.989915612 | 0.863488457   |
| M337T244   | 0.78353318  | 0.989889201 | 0.863161631   |
| M251T55    | 0.782139015 | 0.989794685 | 0.861990674   |
| M275T55    | 0.778151028 | 0.989521152 | 0.858611941   |
| M452T201   | 0.776944268 | 0.989437441 | 0.857580893   |
| M353T371   | 0.775276191 | 0.989320996 | 0.856148963   |
| M221T111   | 0.774711444 | 0.989281395 | 0.855662663   |
| M471T124   | 0.773572519 | 0.989201181 | 0.854678365   |
| M328T33    | 0.772026336 | 0.989091656 | 0.853336533   |
| M774T70    | 0.770144396 | 0.988957325 | 0.85169398    |
| M381T263   | 0.768205668 | 0.988817752 | 0.849991042   |
| M478T200   | 0.767992992 | 0.988802326 | 0.849802897   |
| M876T97    | 0.766210992 | 0.988672872 | 0.848227333   |
| M366T240   | 0.765696739 | 0.988635308 | 0.847770699   |
| M275T33    | 0.764616373 | 0.988556104 | 0.846808778   |
| M711T26_2  | 0.764402816 | 0.9885404   | 0.846618207   |

|            |             |             |             |
|------------|-------------|-------------|-------------|
| M507T156   | 0.76270959  | 0.988415357 | 0.845102398 |
| M390T91    | 0.762139423 | 0.988373031 | 0.844589994 |
| M417T248   | 0.760612734 | 0.988259151 | 0.843213017 |
| M652T235   | 0.760303918 | 0.988236015 | 0.842933562 |
| M731T348   | 0.75954553  | 0.988179067 | 0.842246156 |
| M631T36    | 0.757837259 | 0.988050047 | 0.84069104  |
| M618T155   | 0.757733807 | 0.988042199 | 0.840596548 |
| M520T193   | 0.757162667 | 0.987998814 | 0.840074385 |
| M433T246   | 0.75558686  | 0.987859458 | 0.838325236 |
| M823T214   | 0.753276065 | 0.987700459 | 0.836493067 |
| M215T371   | 0.751386283 | 0.987553394 | 0.834733882 |
| M576T92    | 0.750722379 | 0.987501081 | 0.834107782 |
| M321T98    | 0.748074409 | 0.987292429 | 0.831622028 |
| M799T199   | 0.747598314 | 0.987254575 | 0.831171702 |
| M532T109   | 0.745491904 | 0.987086023 | 0.829169628 |
| M269T81    | 0.745096395 | 0.987054193 | 0.828792168 |
| M339T27    | 0.744472982 | 0.987003883 | 0.828195894 |
| M465T37    | 0.743834842 | 0.986952187 | 0.827583539 |
| M753T175   | 0.740803619 | 0.986703536 | 0.824641658 |
| M240T63    | 0.736203354 | 0.98632161  | 0.820154608 |
| M293T117   | 0.733110157 | 0.986059036 | 0.817082009 |
| M407T34    | 0.731817333 | 0.985947659 | 0.815780896 |
| M339T31    | 0.731647232 | 0.985931832 | 0.81559205  |
| M476T199   | 0.730440371 | 0.985795459 | 0.813885931 |
| M466T169_2 | 0.730027521 | 0.98579318  | 0.813983308 |
| M312T28_2  | 0.725389173 | 0.985385117 | 0.809251304 |
| M284T44    | 0.725161727 | 0.985364814 | 0.809016484 |
| M261T225   | 0.724946056 | 0.985345607 | 0.808794653 |
| M539T153   | 0.724742933 | 0.985327463 | 0.808585026 |
| M313T469   | 0.722477385 | 0.985123786 | 0.806235836 |
| M411T35    | 0.720510925 | 0.984944986 | 0.80417939  |
| M397T77    | 0.720443665 | 0.984938797 | 0.804108155 |
| M897T93    | 0.718995411 | 0.984805889 | 0.802583337 |
| M435T243   | 0.718735644 | 0.984781934 | 0.802308791 |
| M311T28    | 0.718425759 | 0.984753313 | 0.801980909 |
| M245T217   | 0.718150539 | 0.984727843 | 0.801689211 |
| M666T23    | 0.717192723 | 0.984638933 | 0.800671898 |
| M696T212   | 0.716789924 | 0.984601399 | 0.800242815 |
| M512T132   | 0.716565028 | 0.984580421 | 0.800003144 |
| M282T198   | 0.713813808 | 0.98432153  | 0.797050959 |
| M228T301   | 0.712974571 | 0.984241754 | 0.796143455 |
| M818T202   | 0.712205654 | 0.984168358 | 0.795309526 |
| M285T32    | 0.711752582 | 0.984124959 | 0.794816837 |

|            |             |             |             |
|------------|-------------|-------------|-------------|
| M678T161   | 0.711244819 | 0.984076161 | 0.794263133 |
| M180T83    | 0.709522211 | 0.983909683 | 0.792377437 |
| M483T416   | 0.708344188 | 0.98379487  | 0.791079498 |
| M450T26_1  | 0.708171719 | 0.983778004 | 0.790889042 |
| M475T181   | 0.706640135 | 0.983627434 | 0.789190582 |
| M431T123   | 0.706139872 | 0.983577966 | 0.788633373 |
| M200T61    | 0.705025991 | 0.983467289 | 0.787388076 |
| M297T28    | 0.704343242 | 0.983399126 | 0.786622206 |
| M422T304   | 0.704099821 | 0.983374751 | 0.786348493 |
| M821T39    | 0.703259464 | 0.983290338 | 0.785401328 |
| M390T44    | 0.701417789 | 0.983103883 | 0.783313234 |
| M417T34    | 0.700786943 | 0.983039532 | 0.782593792 |
| M837T211   | 0.699396731 | 0.982896921 | 0.781001936 |
| M291T541   | 0.698688682 | 0.982823825 | 0.780187244 |
| M229T198   | 0.696933008 | 0.98264123  | 0.778155774 |
| M957T34    | 0.696528858 | 0.982598925 | 0.77768586  |
| M164T114   | 0.696502846 | 0.982596164 | 0.777655082 |
| M445T373   | 0.69626256  | 0.982570973 | 0.777375467 |
| M505T28    | 0.69625555  | 0.982570252 | 0.777367504 |
| M333T246   | 0.695418343 | 0.982482136 | 0.776390014 |
| M223T59    | 0.695363406 | 0.982476341 | 0.776325777 |
| M217T370   | 0.695363307 | 0.982476324 | 0.776325562 |
| M253T64    | 0.695299536 | 0.982469579 | 0.776250748 |
| M829T78    | 0.694803892 | 0.982417182 | 0.775670236 |
| M515T92    | 0.69475722  | 0.982412235 | 0.775615436 |
| M545T116   | 0.69469785  | 0.982405939 | 0.77554568  |
| M315T181_2 | 0.694621452 | 0.98239784  | 0.775455997 |
| M322T131   | 0.69365321  | 0.982294611 | 0.774312859 |
| M497T212   | 0.693589697 | 0.9822881   | 0.774241755 |
| M315T35_1  | 0.693507218 | 0.982279299 | 0.774144463 |
| M302T193   | 0.692780511 | 0.982201536 | 0.773285234 |
| M803T55    | 0.692761086 | 0.982199459 | 0.773262324 |
| M342T163   | 0.691088365 | 0.982019124 | 0.771273413 |
| M497T91    | 0.691060391 | 0.982016091 | 0.771240004 |
| M291T273   | 0.690938528 | 0.982002404 | 0.771087689 |
| M366T34_1  | 0.689603757 | 0.981857466 | 0.769494659 |
| M597T34    | 0.688886438 | 0.981778839 | 0.768631018 |
| M795T199   | 0.688790173 | 0.981768264 | 0.768514944 |
| M225T321   | 0.688096883 | 0.981691871 | 0.767676805 |
| M702T34    | 0.687286361 | 0.981602103 | 0.766692962 |
| M629T37_2  | 0.686735946 | 0.981540936 | 0.766023466 |
| M735T214   | 0.686693895 | 0.981536229 | 0.765971891 |
| M253T52    | 0.686041625 | 0.981463423 | 0.76517571  |

|            |             |             |             |
|------------|-------------|-------------|-------------|
| M431T250   | 0.685294875 | 0.981379669 | 0.764260715 |
| M668T22    | 0.68430651  | 0.981268167 | 0.763044096 |
| M879T80    | 0.683387123 | 0.981163861 | 0.761907858 |
| M409T33    | 0.682107778 | 0.981017609 | 0.760317197 |
| M509T157   | 0.682107706 | 0.981017562 | 0.760316572 |
| M180T110   | 0.682085304 | 0.98101505  | 0.760289472 |
| M646T82    | 0.681123197 | 0.980904251 | 0.759086585 |
| M205T59    | 0.680823099 | 0.980869546 | 0.758710192 |
| M269T56    | 0.680628805 | 0.98084704  | 0.758466187 |
| M275T219   | 0.68029782  | 0.980808635 | 0.758049993 |
| M794T71    | 0.679404876 | 0.980704597 | 0.756923604 |
| M220T26    | 0.679324182 | 0.980695159 | 0.756821479 |
| M581T36    | 0.679307393 | 0.980692744 | 0.756793901 |
| M187T328   | 0.67903194  | 0.980660876 | 0.756450437 |
| M1023T172  | 0.678361442 | 0.980582236 | 0.755600849 |
| M462T243   | 0.677609056 | 0.980305424 | 0.752019393 |
| M860T49    | 0.677495225 | 0.980480008 | 0.754497421 |
| M267T259   | 0.677343534 | 0.980462022 | 0.754303371 |
| M675T214_2 | 0.676573942 | 0.980370305 | 0.753313989 |
| M294T294   | 0.676349607 | 0.980343877 | 0.753030376 |
| M1025T78   | 0.675545639 | 0.980247709 | 0.751995598 |
| M604T209   | 0.675476703 | 0.980239435 | 0.751906628 |
| M276T319   | 0.675189749 | 0.980204961 | 0.75153604  |
| M417T28    | 0.673179282 | 0.979961541 | 0.748924228 |
| M476T317   | 0.672175893 | 0.979838776 | 0.747610185 |
| M981T81    | 0.672160848 | 0.979836928 | 0.747590425 |
| M516T187   | 0.672003471 | 0.979817594 | 0.747383673 |
| M535T165   | 0.671672468 | 0.979776851 | 0.746948148 |
| M282T107   | 0.671297525 | 0.979730597 | 0.746454026 |
| M433T34_2  | 0.67083297  | 0.97967311  | 0.745840297 |
| M329T318   | 0.669463754 | 0.979502571 | 0.744022368 |
| M687T34    | 0.669458997 | 0.979501975 | 0.744016015 |
| M353T38    | 0.667795596 | 0.97929253  | 0.741788897 |
| M247T269   | 0.667600495 | 0.979267793 | 0.74152625  |
| M515T213   | 0.66747616  | 0.979252018 | 0.74135881  |
| M199T260   | 0.666939079 | 0.9791837   | 0.740634067 |
| M395T208   | 0.666601547 | 0.979140621 | 0.740177367 |
| M289T234   | 0.665914475 | 0.979052604 | 0.739245066 |
| M399T259   | 0.665258854 | 0.978968021 | 0.738349589 |
| M303T51    | 0.664726427 | 0.978899389 | 0.737624783 |
| M398T77    | 0.66435553  | 0.978851278 | 0.737116642 |
| M273T262   | 0.664113835 | 0.978819854 | 0.736784916 |
| M408T76    | 0.663899243 | 0.978791906 | 0.736489997 |

|           |             |             |             |
|-----------|-------------|-------------|-------------|
| M532T92   | 0.663085744 | 0.978685527 | 0.735368332 |
| M847T101  | 0.662990728 | 0.978673083 | 0.735237288 |
| M915T126  | 0.662620777 | 0.978624477 | 0.734725424 |
| M538T108  | 0.662565632 | 0.978617219 | 0.734649019 |
| M277T108  | 0.661880692 | 0.978526817 | 0.733697914 |
| M474T375  | 0.661624051 | 0.978492825 | 0.733340575 |
| M952T33   | 0.661539668 | 0.978481405 | 0.733219873 |
| M199T91   | 0.660294903 | 0.978315661 | 0.731480472 |
| M773T200  | 0.660070647 | 0.978285652 | 0.731165992 |
| M296T53   | 0.659333846 | 0.978186523 | 0.730127502 |
| M689T191  | 0.659275368 | 0.978178611 | 0.73004461  |
| M270T32   | 0.659207999 | 0.978169535 | 0.729949664 |
| M242T106  | 0.658999499 | 0.978141355 | 0.729654749 |
| M237T59_2 | 0.657306445 | 0.977910826 | 0.727246072 |
| M339T337  | 0.657055839 | 0.977876442 | 0.726887414 |
| M173T423  | 0.657009571 | 0.977870089 | 0.726821159 |
| M323T40   | 0.656884064 | 0.977852836 | 0.726641261 |
| M407T246  | 0.656727919 | 0.977831349 | 0.72641727  |
| M195T59   | 0.656633879 | 0.977818393 | 0.726282233 |
| M375T28   | 0.65654424  | 0.977806042 | 0.72615354  |
| M253T129  | 0.655598264 | 0.977675119 | 0.724790487 |
| M308T88   | 0.655440603 | 0.977653202 | 0.724562513 |
| M347T61   | 0.654446979 | 0.977514416 | 0.723120333 |
| M543T109  | 0.654273305 | 0.977488933 | 0.722852597 |
| M537T93   | 0.653863474 | 0.977432442 | 0.722269786 |
| M375T155  | 0.653496069 | 0.977379585 | 0.721718829 |
| M153T371  | 0.652987275 | 0.977308575 | 0.72098609  |
| M343T301  | 0.651974473 | 0.977164301 | 0.719493369 |
| M222T204  | 0.651795279 | 0.977138649 | 0.719228243 |
| M845T80   | 0.651428939 | 0.977086056 | 0.718684825 |
| M497T188  | 0.650705414 | 0.976981673 | 0.7176072   |
| M361T141  | 0.650637759 | 0.976972037 | 0.717508235 |
| M435T116  | 0.650386727 | 0.976935619 | 0.717132542 |
| M185T386  | 0.650330528 | 0.976927544 | 0.717049501 |
| M348T230  | 0.650288541 | 0.976921454 | 0.716986725 |
| M1128T144 | 0.650256005 | 0.976916736 | 0.716938112 |
| M507T160  | 0.649954609 | 0.976872947 | 0.716486926 |
| M381T205  | 0.649483894 | 0.976804348 | 0.715780624 |
| M118T27   | 0.649425456 | 0.976795812 | 0.71569278  |
| M469T202  | 0.648836818 | 0.9767096   | 0.714806046 |
| M62T13    | 0.648337984 | 0.976636203 | 0.714051843 |
| M847T131  | 0.648228566 | 0.976620062 | 0.713886097 |
| M273T242  | 0.647679622 | 0.976538858 | 0.713052608 |

|             |             |             |             |
|-------------|-------------|-------------|-------------|
| M433T250    | 0.647130038 | 0.976457168 | 0.712214933 |
| M974T34     | 0.646826286 | 0.976411868 | 0.711750812 |
| M731T26     | 0.646157616 | 0.976311707 | 0.710725448 |
| M226T114    | 0.646026502 | 0.976291998 | 0.710523821 |
| M409T251    | 0.645860938 | 0.976267075 | 0.710268908 |
| M391T35     | 0.645256004 | 0.976175731 | 0.709335389 |
| M553T230    | 0.644884626 | 0.976119412 | 0.708760319 |
| M368T44     | 0.644182742 | 0.976012466 | 0.707669345 |
| M1029T400_2 | 0.643907704 | 0.975970379 | 0.707240391 |
| M310T249    | 0.643888686 | 0.975967465 | 0.707210697 |
| M801T596    | 0.643669981 | 0.975933821 | 0.706867684 |
| M557T304    | 0.64364859  | 0.975930635 | 0.706835506 |
| M1001T80    | 0.64361571  | 0.975925584 | 0.706784065 |
| M235T263_2  | 0.643502141 | 0.975908127 | 0.706606285 |
| M309T58     | 0.643411851 | 0.975894241 | 0.706464918 |
| M1162T423_1 | 0.643355252 | 0.97588553  | 0.706376242 |
| M251T585    | 0.643335846 | 0.975882515 | 0.706345485 |
| M485T242    | 0.643294345 | 0.97587615  | 0.706280768 |
| M357T35     | 0.643200435 | 0.975861667 | 0.706133343 |
| M853T87     | 0.643163057 | 0.975855912 | 0.706074802 |
| M551T314    | 0.642996524 | 0.97583021  | 0.705813298 |
| M237T44     | 0.64285588  | 0.975808473 | 0.7055922   |
| M452T123    | 0.642697877 | 0.975784018 | 0.70534353  |
| M402T230    | 0.642484764 | 0.975750959 | 0.705007404 |
| M408T33     | 0.642456066 | 0.975746502 | 0.704962112 |
| M281T254    | 0.641789268 | 0.975642726 | 0.703908177 |
| M505T203    | 0.641762066 | 0.975638479 | 0.703865065 |
| M163T111    | 0.64138706  | 0.975579801 | 0.703269668 |
| M98T106     | 0.64123772  | 0.975556392 | 0.703032285 |
| M284T114    | 0.640842676 | 0.975494178 | 0.702401366 |
| M297T35     | 0.640835749 | 0.975493192 | 0.702391652 |
| M447T99     | 0.640786381 | 0.975485416 | 0.702312869 |
| M112T329    | 0.640551661 | 0.975448394 | 0.701937866 |
| M496T107    | 0.64037038  | 0.975419745 | 0.701647767 |
| M647T36     | 0.640282345 | 0.975405813 | 0.701506731 |
| M179T59     | 0.640056589 | 0.97537004  | 0.701144702 |
| M598T346    | 0.639922985 | 0.975348554 | 0.70092658  |
| M142T242    | 0.639906865 | 0.975346271 | 0.700904234 |
| M323T199    | 0.639729729 | 0.975318107 | 0.700619381 |
| M464T308    | 0.639367939 | 0.975260442 | 0.700036454 |
| M373T395    | 0.6393266   | 0.975253849 | 0.699969852 |
| M97T111     | 0.638736433 | 0.975159337 | 0.699015368 |
| M588T114    | 0.63869417  | 0.975152549 | 0.698946852 |

|            |             |             |             |
|------------|-------------|-------------|-------------|
| M215T259   | 0.638529154 | 0.975126022 | 0.698679175 |
| M465T289   | 0.638504738 | 0.97512209  | 0.698639493 |
| M922T422_1 | 0.638380603 | 0.975102091 | 0.698437713 |
| M593T392   | 0.638226517 | 0.975077256 | 0.698187263 |
| M460T317   | 0.638153716 | 0.975065488 | 0.698068562 |
| M381T53    | 0.638090121 | 0.975055233 | 0.697965217 |
| M722T26    | 0.637969019 | 0.975035659 | 0.697767899 |
| M339T138   | 0.637451213 | 0.974951686 | 0.696921888 |
| M678T500   | 0.637260487 | 0.974920657 | 0.696609497 |
| M697T199   | 0.636843063 | 0.974852566 | 0.695924406 |
| M476T119   | 0.636587191 | 0.974810685 | 0.695503256 |
| M459T26    | 0.636487458 | 0.974794247 | 0.695337801 |
| M157T93    | 0.636486512 | 0.974794177 | 0.695337319 |
| M321T294   | 0.636338307 | 0.974769841 | 0.69509272  |
| M262T112   | 0.63596514  | 0.974708437 | 0.69447593  |
| M294T105   | 0.635963083 | 0.974708098 | 0.694472526 |
| M634T346   | 0.635835486 | 0.974687049 | 0.694261176 |
| M362T104   | 0.635811581 | 0.974683103 | 0.694221573 |
| M397T223   | 0.635565084 | 0.974642157 | 0.693810106 |
| M466T124   | 0.635494447 | 0.974630644 | 0.693695062 |
| M437T299   | 0.635288957 | 0.974596593 | 0.69335354  |
| M945T465_1 | 0.635101443 | 0.974565417 | 0.693040851 |
| M799T53    | 0.635007088 | 0.974549676 | 0.692882931 |
| M374T115   | 0.63478355  | 0.974512518 | 0.69251076  |
| M221T61    | 0.634654409 | 0.974490967 | 0.692294857 |
| M618T34    | 0.634579816 | 0.974478507 | 0.692170049 |
| M1008T80   | 0.634326419 | 0.974436112 | 0.691745546 |
| M743T342   | 0.633977522 | 0.974377567 | 0.691159659 |
| M587T32    | 0.63385187  | 0.974356433 | 0.690948257 |
| M304T108   | 0.633815433 | 0.974350299 | 0.6908869   |
| M295T176   | 0.63381317  | 0.97434986  | 0.690882362 |
| M434T84    | 0.633696443 | 0.974330244 | 0.690686322 |
| M150T225   | 0.633468475 | 0.974291785 | 0.69030189  |
| M293T274   | 0.633435377 | 0.974286189 | 0.690245951 |
| M409T34_1  | 0.633428565 | 0.974285005 | 0.690234029 |
| M174T264   | 0.632783076 | 0.974175599 | 0.689141413 |
| M150T119   | 0.632090753 | 0.974057326 | 0.687961373 |
| M449T358   | 0.632067968 | 0.97405352  | 0.687923729 |
| M455T443   | 0.631939246 | 0.974033879 | 0.687734119 |
| M451T115   | 0.631784431 | 0.974004875 | 0.687438919 |
| M1003T80   | 0.631710082 | 0.973992095 | 0.687311607 |
| M390T56    | 0.631694515 | 0.973989418 | 0.68728494  |
| M707T241   | 0.631329018 | 0.97392642  | 0.686657562 |

|           |             |             |             |
|-----------|-------------|-------------|-------------|
| M188T97   | 0.631260086 | 0.973914536 | 0.686539325 |
| M323T84_1 | 0.631096769 | 0.973886307 | 0.686258436 |
| M273T33   | 0.631090522 | 0.973885216 | 0.686247554 |
| M381T23   | 0.63103837  | 0.973876174 | 0.686157552 |
| M284T83   | 0.630958572 | 0.973862379 | 0.686020387 |
| M279T506  | 0.63079141  | 0.97383339  | 0.685732078 |
| M255T262  | 0.630400901 | 0.973765469 | 0.685056917 |
| M321T103  | 0.630117699 | 0.973716049 | 0.684566005 |
| M392T44   | 0.630004557 | 0.973696262 | 0.684369509 |
| M410T274  | 0.62994184  | 0.973685284 | 0.684260522 |
| M697T212  | 0.629936345 | 0.973684319 | 0.684250938 |
| M372T336  | 0.629488337 | 0.973605689 | 0.683470661 |
| M921T52   | 0.629288578 | 0.973570496 | 0.683121607 |
| M549T91   | 0.628763008 | 0.973477429 | 0.682198894 |
| M912T34_2 | 0.628622866 | 0.973452738 | 0.681954789 |
| M206T375  | 0.628550449 | 0.97343985  | 0.681827107 |
| M540T114  | 0.628487247 | 0.973428646 | 0.68171625  |
| M633T247  | 0.628397775 | 0.973412731 | 0.681558701 |
| M603T26   | 0.628115657 | 0.973362453 | 0.681061167 |
| M131T257  | 0.627988499 | 0.973339738 | 0.68083647  |
| M541T35   | 0.627891631 | 0.973322415 | 0.680665154 |
| M220T56   | 0.627700759 | 0.973288234 | 0.680327211 |
| M440T114  | 0.627604664 | 0.973270996 | 0.680156837 |
| M459T24   | 0.627469673 | 0.973246754 | 0.679917279 |
| M100T57   | 0.627388499 | 0.973232159 | 0.679773085 |
| M310T431  | 0.627259809 | 0.973208983 | 0.679544128 |
| M841T56   | 0.627177302 | 0.973194126 | 0.679397429 |
| M662T174  | 0.62697101  | 0.97315689  | 0.679029792 |
| M209T333  | 0.626800066 | 0.973124549 | 0.678707087 |
| M603T201  | 0.626571343 | 0.973084491 | 0.678315346 |
| M724T36   | 0.62631535  | 0.973037999 | 0.677856963 |
| M542T111  | 0.626225465 | 0.973021633 | 0.677695633 |
| M423T232  | 0.626223469 | 0.973021262 | 0.677691947 |
| M963T39   | 0.62593712  | 0.97296838  | 0.67716929  |
| M395T222  | 0.625659496 | 0.972918215 | 0.676676812 |
| M133T324  | 0.625635984 | 0.972913905 | 0.676634381 |
| M467T169  | 0.625269433 | 0.972846533 | 0.67597123  |
| M569T101  | 0.625004636 | 0.972797452 | 0.67548783  |
| M364T110  | 0.624932838 | 0.972784492 | 0.675361129 |
| M279T84   | 0.624830704 | 0.972765583 | 0.675175166 |
| M375T98   | 0.624339875 | 0.972674566 | 0.674280945 |
| M707T118  | 0.624128201 | 0.972635111 | 0.673893474 |
| M1004T170 | 0.624051709 | 0.972620879 | 0.673753852 |

|           |             |             |             |
|-----------|-------------|-------------|-------------|
| M318T81   | 0.624020829 | 0.972615115 | 0.673697283 |
| M816T32   | 0.623686246 | 0.972552526 | 0.673083164 |
| M348T116  | 0.622958771 | 0.972415646 | 0.671741589 |
| M293T301  | 0.622790329 | 0.972383812 | 0.671429903 |
| M163T55   | 0.622597325 | 0.972347237 | 0.67107187  |
| M553T33   | 0.622417436 | 0.972313072 | 0.670737564 |
| M396T101  | 0.622369814 | 0.972304005 | 0.670648824 |
| M496T319  | 0.62232194  | 0.972294907 | 0.670559848 |
| M301T114  | 0.622189423 | 0.972269662 | 0.670312931 |
| M258T107  | 0.622132827 | 0.972258844 | 0.670207082 |
| M109T111  | 0.621896381 | 0.972213714 | 0.669765975 |
| M550T36_2 | 0.621843446 | 0.972203588 | 0.669667005 |
| M639T32   | 0.621693691 | 0.972174902 | 0.66938672  |
| M192T505  | 0.621276298 | 0.972094683 | 0.668603315 |
| M207T304  | 0.621143355 | 0.972069037 | 0.668352976 |
| M244T114  | 0.621134514 | 0.972067346 | 0.668336513 |
| M227T318  | 0.621077378 | 0.97205636  | 0.668229406 |
| M336T170  | 0.620998388 | 0.972041057 | 0.668079992 |
| M161T82   | 0.620922453 | 0.972026373 | 0.667936744 |
| M449T26   | 0.620908623 | 0.972023586 | 0.667909292 |
| M195T266  | 0.62066206  | 0.971975919 | 0.667444699 |
| M183T85   | 0.620352081 | 0.97191388  | 0.666835847 |
| M482T243  | 0.620239755 | 0.971893763 | 0.666644039 |
| M188T83   | 0.620216691 | 0.971889225 | 0.666599735 |
| M251T139  | 0.619805403 | 0.971808777 | 0.665816374 |
| M615T92   | 0.619724102 | 0.971792848 | 0.665661395 |
| M242T59   | 0.619590717 | 0.971766685 | 0.665406906 |
| M223T87   | 0.61945685  | 0.97174035  | 0.665150722 |
| M595T148  | 0.619311748 | 0.971711752 | 0.664872596 |
| M705T181  | 0.61919891  | 0.971689489 | 0.664656151 |
| M867T102  | 0.619121276 | 0.97167353  | 0.664499578 |
| M446T243  | 0.618889245 | 0.971628215 | 0.664060667 |
| M142T113  | 0.618854956 | 0.971621416 | 0.663994605 |
| M163T34_2 | 0.61881405  | 0.971613291 | 0.663915654 |
| M471T34_2 | 0.618757396 | 0.971601909 | 0.663804785 |
| M306T83_1 | 0.618738617 | 0.971598325 | 0.663770312 |
| M255T271  | 0.618662812 | 0.971583261 | 0.663624004 |
| M285T219  | 0.618461434 | 0.971543174 | 0.663234781 |
| M359T114  | 0.618212594 | 0.971493516 | 0.662752883 |
| M699T214  | 0.617952292 | 0.971440872 | 0.662241036 |
| M321T320  | 0.617332781 | 0.971316617 | 0.661037921 |
| M306T114  | 0.617322756 | 0.971314654 | 0.661019062 |
| M185T37   | 0.617308829 | 0.971311755 | 0.660990785 |

|            |             |             |             |
|------------|-------------|-------------|-------------|
| M259T104   | 0.617275725 | 0.971305119 | 0.660926662 |
| M841T127   | 0.617269494 | 0.971303886 | 0.660914779 |
| M373T336_1 | 0.617218678 | 0.971293603 | 0.660815201 |
| M205T39    | 0.617099526 | 0.97126947  | 0.66058155  |
| M145T112   | 0.617000576 | 0.9712494   | 0.660387278 |
| M731T34    | 0.616935815 | 0.971236232 | 0.660259781 |
| M576T40    | 0.616543364 | 0.971156337 | 0.659486942 |
| M274T169   | 0.616089974 | 0.971063528 | 0.658589911 |
| M219T263   | 0.616089169 | 0.971063359 | 0.658588268 |
| M223T39    | 0.616083414 | 0.971062181 | 0.658576891 |
| M437T33    | 0.616065241 | 0.971058446 | 0.658540799 |
| M927T422_1 | 0.615859548 | 0.971016145 | 0.658132239 |
| M349T216   | 0.615362173 | 0.9709134   | 0.65714056  |
| M1052T173  | 0.615296653 | 0.970899818 | 0.657009552 |
| M970T24    | 0.615151344 | 0.970869648 | 0.656718591 |
| M557T169   | 0.614814991 | 0.970799594 | 0.656043292 |
| M87T116    | 0.614771821 | 0.97079058  | 0.655956441 |
| M917T173   | 0.614755185 | 0.970787094 | 0.655922825 |
| M595T217   | 0.614069373 | 0.97064319  | 0.654537283 |
| M452T115   | 0.613950177 | 0.970618048 | 0.654295401 |
| M557T114   | 0.613844232 | 0.97059564  | 0.654079819 |
| M260T105   | 0.613783151 | 0.970582739 | 0.653955795 |
| M141T116   | 0.61363129  | 0.970548862 | 0.653626274 |
| M656T348   | 0.613443617 | 0.970510522 | 0.653261136 |
| M114T168   | 0.613430556 | 0.970507954 | 0.65323692  |
| M224T62    | 0.613398662 | 0.970501063 | 0.653170457 |
| M418T246   | 0.612910584 | 0.970396721 | 0.652167957 |
| M153T27    | 0.612805029 | 0.970374395 | 0.651954328 |
| M341T34    | 0.612587765 | 0.970325497 | 0.65148018  |
| M222T60    | 0.612550671 | 0.970319761 | 0.651430132 |
| M451T34    | 0.612513275 | 0.970311477 | 0.651350152 |
| M263T115   | 0.612485155 | 0.970305659 | 0.651294877 |
| M293T119   | 0.612459027 | 0.970299502 | 0.651234659 |
| M645T34    | 0.612423015 | 0.97029227  | 0.651166467 |
| M372T105   | 0.612139936 | 0.970231135 | 0.650580368 |
| M694T213   | 0.612049435 | 0.970210579 | 0.65038127  |
| M563T185   | 0.611946234 | 0.970189163 | 0.650178188 |
| M991T170   | 0.611943612 | 0.970188593 | 0.65017272  |
| M293T168   | 0.611918963 | 0.970183243 | 0.650121471 |
| M283T44    | 0.611876819 | 0.970174092 | 0.650033803 |
| M379T25    | 0.611850476 | 0.970168373 | 0.649979032 |
| M275T581   | 0.611795495 | 0.970156424 | 0.64986458  |
| M756T348   | 0.611704499 | 0.970136627 | 0.649674978 |

|            |             |             |             |
|------------|-------------|-------------|-------------|
| M497T40    | 0.611661434 | 0.970127245 | 0.649585153 |
| M263T34_2  | 0.61157446  | 0.970108282 | 0.649403587 |
| M732T35    | 0.611482748 | 0.970088278 | 0.649212133 |
| M370T231   | 0.611418202 | 0.970074172 | 0.649077119 |
| M711T214   | 0.611360968 | 0.970061654 | 0.64895732  |
| M1046T58   | 0.611311253 | 0.970050781 | 0.648853292 |
| M258T168   | 0.611162756 | 0.97001817  | 0.648541164 |
| M382T53    | 0.611043937 | 0.969992154 | 0.648292509 |
| M581T254   | 0.611028483 | 0.969988761 | 0.648260066 |
| M636T174   | 0.610928891 | 0.969966853 | 0.648050584 |
| M378T24    | 0.610914664 | 0.969963685 | 0.648020221 |
| M313T33    | 0.610891901 | 0.969958708 | 0.647972716 |
| M379T453   | 0.610746286 | 0.969926614 | 0.647665956 |
| M555T107   | 0.610639845 | 0.96990311  | 0.64744135  |
| M535T66    | 0.61054494  | 0.969882116 | 0.64724076  |
| M130T50    | 0.610490359 | 0.96986882  | 0.647111131 |
| M183T279   | 0.61044389  | 0.969859726 | 0.647026871 |
| M296T83    | 0.610397899 | 0.969849549 | 0.646929717 |
| M146T676   | 0.610378484 | 0.969845243 | 0.646888592 |
| M1036T185  | 0.610326569 | 0.969833718 | 0.646778526 |
| M717T151   | 0.610241632 | 0.969814856 | 0.646598436 |
| M259T106   | 0.610219454 | 0.969809924 | 0.64655135  |
| M904T127   | 0.61012462  | 0.969788821 | 0.646349904 |
| M353T115   | 0.609858566 | 0.969729482 | 0.645783693 |
| M206T183   | 0.609848513 | 0.969727224 | 0.645762129 |
| M313T28_1  | 0.609753785 | 0.969705318 | 0.645551626 |
| M298T273   | 0.609504343 | 0.969650112 | 0.645026832 |
| M980T168_1 | 0.609495024 | 0.96964802  | 0.645006861 |
| M563T317   | 0.609431373 | 0.969633661 | 0.644869879 |
| M736T26_2  | 0.609429792 | 0.969633356 | 0.644867086 |
| M781T345   | 0.608991732 | 0.969534525 | 0.643925533 |
| M321T363   | 0.608973481 | 0.969530389 | 0.643886134 |
| M277T353   | 0.608696212 | 0.969467491 | 0.643287381 |
| M449T60    | 0.608624325 | 0.969451139 | 0.643131775 |
| M901T127   | 0.608571178 | 0.969438792 | 0.643013765 |
| M1016T168  | 0.607922891 | 0.969290667 | 0.641605899 |
| M422T242   | 0.607820724 | 0.96926714  | 0.641382353 |
| M279T113   | 0.607639649 | 0.969225388 | 0.640985814 |
| M255T24    | 0.607493841 | 0.969191632 | 0.64066522  |
| M401T33    | 0.607391425 | 0.969167946 | 0.640440473 |
| M1051T157  | 0.607213798 | 0.969126705 | 0.640049112 |
| M282T143   | 0.607202869 | 0.969124163 | 0.640024985 |
| M441T281   | 0.607179804 | 0.969118787 | 0.639973952 |

|             |             |             |             |
|-------------|-------------|-------------|-------------|
| M77T230     | 0.607175866 | 0.969117882 | 0.639965396 |
| M320T83     | 0.607027351 | 0.969083296 | 0.639637321 |
| M179T169    | 0.606738272 | 0.969015743 | 0.638996818 |
| M298T24     | 0.60639357  | 0.968934795 | 0.638229815 |
| M429T55     | 0.606331508 | 0.968920144 | 0.638090982 |
| M663T220    | 0.606238733 | 0.968897838 | 0.637878871 |
| M396T581    | 0.606218119 | 0.968893176 | 0.637835159 |
| M119T114    | 0.606171832 | 0.968882495 | 0.637734549 |
| M393T251    | 0.606142765 | 0.968875624 | 0.637669495 |
| M1158T422_1 | 0.606042788 | 0.968851254 | 0.637437331 |
| M197T26_2   | 0.606002068 | 0.968842327 | 0.637354323 |
| M313T314    | 0.605915945 | 0.968820282 | 0.637142342 |
| M365T34     | 0.605830958 | 0.968801732 | 0.636970179 |
| M269T39     | 0.605762504 | 0.96878546  | 0.63681624  |
| M138T25     | 0.605752742 | 0.968783137 | 0.636794267 |
| M318T108    | 0.605646344 | 0.968757816 | 0.636554793 |
| M346T250    | 0.60556226  | 0.968737575 | 0.63636298  |
| M264T388    | 0.605531035 | 0.96873031  | 0.636294675 |
| M486T37     | 0.605516508 | 0.968726842 | 0.636261889 |
| M675T144    | 0.605292171 | 0.968673182 | 0.635754654 |
| M657T32     | 0.605212701 | 0.968653873 | 0.635571678 |
| M298T167    | 0.605194931 | 0.96864986  | 0.635534274 |
| M402T346    | 0.605115317 | 0.968630742 | 0.635353644 |
| M391T247    | 0.6050085   | 0.968605047 | 0.635110939 |
| M276T168    | 0.604991824 | 0.968601035 | 0.635073053 |
| M455T318    | 0.604892875 | 0.96857719  | 0.634847867 |
| M334T169    | 0.60480715  | 0.968556465 | 0.634652114 |
| M269T124    | 0.604542561 | 0.968492457 | 0.634048053 |
| M239T122    | 0.604517102 | 0.968486269 | 0.633989632 |
| M665T220    | 0.60449682  | 0.968480558 | 0.633934146 |
| M1036T172   | 0.604457643 | 0.968471846 | 0.633853582 |
| M181T112    | 0.604268839 | 0.968425908 | 0.633420268 |
| M171T77     | 0.604175199 | 0.968403038 | 0.633204551 |
| M498T127    | 0.604159669 | 0.968399284 | 0.633169233 |
| M158T26     | 0.604147189 | 0.968396246 | 0.633140599 |
| M441T242    | 0.604134874 | 0.968393235 | 0.633112205 |
| M314T243    | 0.603841749 | 0.968321477 | 0.632435885 |
| M737T70     | 0.603745501 | 0.96829784  | 0.632213193 |
| M210T334    | 0.603719013 | 0.968291326 | 0.63215183  |
| M293T82     | 0.603617043 | 0.968266231 | 0.631915472 |
| M357T151    | 0.603591925 | 0.968260043 | 0.631857183 |
| M1021T185   | 0.603400557 | 0.968211991 | 0.631403128 |
| M442T168    | 0.60335702  | 0.968202039 | 0.63131108  |

|           |             |             |             |
|-----------|-------------|-------------|-------------|
| M179T114  | 0.60325616  | 0.968177064 | 0.631076022 |
| M394T316  | 0.602911542 | 0.968091401 | 0.630270153 |
| M583T299  | 0.60289286  | 0.968086749 | 0.630226412 |
| M209T316  | 0.602846602 | 0.968075206 | 0.630117869 |
| M538T33   | 0.602795901 | 0.968062541 | 0.629998774 |
| M310T169  | 0.602783741 | 0.968059512 | 0.629970314 |
| M140T90   | 0.602782958 | 0.968059308 | 0.629968381 |
| M152T230  | 0.6027031   | 0.968039348 | 0.629780758 |
| M250T225  | 0.602616012 | 0.968017509 | 0.629575421 |
| M496T214  | 0.602565624 | 0.968004234 | 0.629449383 |
| M494T169  | 0.602301722 | 0.967938514 | 0.628833191 |
| M654T33   | 0.602260992 | 0.967928303 | 0.628737386 |
| M521T115  | 0.602239553 | 0.967922908 | 0.628686752 |
| M345T180  | 0.601860655 | 0.967827013 | 0.627786526 |
| M297T25   | 0.601663581 | 0.967776877 | 0.627316143 |
| M82T26    | 0.601623738 | 0.967766722 | 0.627220892 |
| M605T32   | 0.601446484 | 0.96772148  | 0.626796686 |
| M641T57   | 0.601399805 | 0.967709538 | 0.626684735 |
| M690T111  | 0.601222458 | 0.967664071 | 0.626258582 |
| M310T65   | 0.601002641 | 0.967606423 | 0.625716351 |
| M521T83   | 0.600835626 | 0.967564385 | 0.62532477  |
| M346T222  | 0.600573853 | 0.967496529 | 0.624689552 |
| M283T24   | 0.600557175 | 0.967492192 | 0.624648964 |
| M435T98   | 0.600471809 | 0.967469981 | 0.624441118 |
| M333T35   | 0.60043087  | 0.967459324 | 0.624341414 |
| M303T83   | 0.600168383 | 0.967390778 | 0.623700281 |
| M401T231  | 0.600115606 | 0.967376949 | 0.623570971 |
| M239T257  | 0.600098159 | 0.96737238  | 0.623528261 |
| M645T81   | 0.60007422  | 0.967366051 | 0.62346899  |
| M343T34   | 0.600065369 | 0.967362916 | 0.623438121 |
| M146T267  | 0.600052088 | 0.967360298 | 0.623415305 |
| M486T106  | 0.59992101  | 0.967325869 | 0.623093481 |
| M161T109  | 0.599837596 | 0.967303911 | 0.62288828  |
| M992T170  | 0.599533706 | 0.967223609 | 0.622138092 |
| M194T150  | 0.599459961 | 0.967204012 | 0.621955011 |
| M505T159  | 0.599318275 | 0.967166397 | 0.621603887 |
| M401T47_1 | 0.599182122 | 0.967130183 | 0.621265991 |
| M605T26   | 0.598999022 | 0.967081158 | 0.620808394 |
| M683T203  | 0.598939633 | 0.967065254 | 0.620660042 |
| M600T346  | 0.598857929 | 0.967043451 | 0.620456905 |
| M424T242  | 0.598633102 | 0.96698298  | 0.6198931   |
| M790T52   | 0.598575035 | 0.966967219 | 0.619746009 |
| M407T190  | 0.598525846 | 0.96695404  | 0.619623375 |

|           |             |             |             |
|-----------|-------------|-------------|-------------|
| M436T320  | 0.598483549 | 0.966942608 | 0.619516837 |
| M626T166  | 0.598308956 | 0.966895334 | 0.619076407 |
| M148T370  | 0.598308259 | 0.966776155 | 0.6177434   |
| M683T200  | 0.598249211 | 0.966879113 | 0.618925315 |
| M525T51   | 0.598219115 | 0.966870443 | 0.618843638 |
| M303T114  | 0.598164388 | 0.966856064 | 0.61871067  |
| M390T36   | 0.598066121 | 0.966829303 | 0.618461488 |
| M117T242  | 0.598017754 | 0.966816032 | 0.618337784 |
| M393T350  | 0.59799414  | 0.966807992 | 0.618259955 |
| M480T322  | 0.597909909 | 0.966786352 | 0.61806109  |
| M353T213  | 0.597713792 | 0.966732929 | 0.61756453  |
| M320T114  | 0.597703619 | 0.96673014  | 0.617538596 |
| M616T34   | 0.597693196 | 0.966727262 | 0.617511791 |
| M575T26   | 0.597639081 | 0.966691969 | 0.617145497 |
| M203T35_1 | 0.597569675 | 0.966693322 | 0.617196119 |
| M117T114  | 0.597523109 | 0.966680497 | 0.617076835 |
| M795T393  | 0.597353693 | 0.966632898 | 0.616632701 |
| M415T34_2 | 0.597343914 | 0.966630283 | 0.61660857  |
| M447T323  | 0.597322686 | 0.966625152 | 0.616562224 |
| M326T249  | 0.597315789 | 0.966623251 | 0.616544566 |
| M198T151  | 0.59730617  | 0.966620591 | 0.616519845 |
| M223T101  | 0.597273893 | 0.966611574 | 0.616435881 |
| M442T35   | 0.597172212 | 0.966583465 | 0.616174781 |
| M440T169  | 0.597150495 | 0.966577429 | 0.616118667 |
| M205T401  | 0.597093233 | 0.96656153  | 0.615970949 |
| M629T37_1 | 0.596983079 | 0.966530877 | 0.615686166 |
| M423T212  | 0.596747591 | 0.966464773 | 0.61507161  |
| M849T33_1 | 0.596592503 | 0.966421622 | 0.614671632 |
| M801T130  | 0.596380172 | 0.966361807 | 0.614116462 |
| M982T171  | 0.596321847 | 0.966345391 | 0.613964245 |
| M178T286  | 0.596240536 | 0.966321338 | 0.613739186 |
| M677T214  | 0.596194363 | 0.966308627 | 0.613621948 |
| M1020T24  | 0.596124632 | 0.96628957  | 0.613446504 |
| M831T88   | 0.596064197 | 0.966271994 | 0.613282753 |
| M517T105  | 0.596009519 | 0.966256886 | 0.613143465 |
| M514T467  | 0.595747226 | 0.966182063 | 0.612449904 |
| M524T192  | 0.595671168 | 0.966160334 | 0.61224864  |
| M380T26   | 0.595582188 | 0.966134751 | 0.612011513 |
| M547T35   | 0.595446128 | 0.966095682 | 0.611649718 |
| M147T181  | 0.595433308 | 0.966091954 | 0.611615139 |
| M317T301  | 0.595292107 | 0.966051293 | 0.611238755 |
| M960T42   | 0.595234486 | 0.966027548 | 0.611006241 |
| M409T17   | 0.59515969  | 0.966010659 | 0.610858457 |

|             |             |             |             |
|-------------|-------------|-------------|-------------|
| M370T319    | 0.595106751 | 0.965997694 | 0.610742728 |
| M330T332    | 0.595099434 | 0.965995525 | 0.610722567 |
| M343T183    | 0.595044385 | 0.96597959  | 0.610575186 |
| M1157T423_2 | 0.595013555 | 0.965970143 | 0.610486908 |
| M215T289    | 0.594976612 | 0.965959904 | 0.610393059 |
| M1160T59    | 0.594928401 | 0.965945876 | 0.61026329  |
| M359T278    | 0.594545331 | 0.965833816 | 0.609226956 |
| M144T317_2  | 0.594392011 | 0.965788795 | 0.608811003 |
| M532T179    | 0.594178666 | 0.965724682 | 0.60821675  |
| M587T414    | 0.594051992 | 0.96568824  | 0.607882162 |
| M380T77     | 0.594035871 | 0.965683452 | 0.607837956 |
| M325T61     | 0.593827924 | 0.965621518 | 0.60726615  |
| M1077T71    | 0.593766464 | 0.965603003 | 0.607094995 |
| M543T60     | 0.593682195 | 0.965577924 | 0.606863804 |
| M114T318    | 0.593651409 | 0.965568752 | 0.606779263 |
| M420T274    | 0.593619705 | 0.965559243 | 0.606691517 |
| M460T85     | 0.593614043 | 0.96555755  | 0.606675906 |
| M193T34_2   | 0.593532435 | 0.965533048 | 0.606449874 |
| M177T33     | 0.593462655 | 0.965512022 | 0.606255888 |
| M279T262    | 0.593456484 | 0.965509996 | 0.60623689  |
| M296T114    | 0.593451485 | 0.965508649 | 0.606224744 |
| M189T59     | 0.593443363 | 0.965506254 | 0.606202745 |
| M207T59     | 0.593392734 | 0.96549081  | 0.606059984 |
| M922T422_2  | 0.593312805 | 0.965466195 | 0.605832158 |
| M421T212    | 0.593284937 | 0.965458456 | 0.605761992 |
| M789T100    | 0.593088431 | 0.965398922 | 0.605213217 |
| M353T92     | 0.593045447 | 0.965385838 | 0.6050926   |
| M728T26_1   | 0.592908938 | 0.965344295 | 0.604709865 |
| M291T68     | 0.592870016 | 0.965332417 | 0.604600444 |
| M330T255    | 0.592732563 | 0.965290387 | 0.604213321 |
| M679T213    | 0.592580399 | 0.96524369  | 0.603783332 |
| M586T203    | 0.592552015 | 0.9652338   | 0.603690292 |
| M222T286    | 0.592466079 | 0.965206941 | 0.603442384 |
| M321T215    | 0.592445623 | 0.96520123  | 0.60339085  |
| M680T213    | 0.592229066 | 0.965135171 | 0.602784525 |
| M1050T352   | 0.592127958 | 0.965103824 | 0.602496244 |
| M572T319    | 0.592034662 | 0.965074783 | 0.60222914  |
| M527T349    | 0.591935718 | 0.965043923 | 0.601945376 |
| M117T413    | 0.591791075 | 0.964998646 | 0.601529116 |
| M127T113    | 0.591721768 | 0.964976902 | 0.601329272 |
| M819T136    | 0.591717698 | 0.964975537 | 0.601316576 |
| M462T255    | 0.591661497 | 0.964957956 | 0.601155149 |
| M772T216    | 0.591637983 | 0.964949776 | 0.601078671 |

|             |             |             |             |
|-------------|-------------|-------------|-------------|
| M137T328    | 0.59157394  | 0.96492912  | 0.600888054 |
| M439T408    | 0.591568415 | 0.964928644 | 0.600885813 |
| M293T328    | 0.591491376 | 0.96490426  | 0.600661669 |
| M266T145    | 0.591470209 | 0.964897599 | 0.600600529 |
| M404T246    | 0.591175892 | 0.964804246 | 0.599743287 |
| M463T211    | 0.591146038 | 0.964794741 | 0.599656046 |
| M922T422_4  | 0.59102059  | 0.964754634 | 0.599287833 |
| M513T26_2   | 0.590998606 | 0.964747618 | 0.599223448 |
| M404T114_1  | 0.59099449  | 0.964745994 | 0.599208029 |
| M923T422_2  | 0.590993034 | 0.964745867 | 0.599207431 |
| M224T671    | 0.590991294 | 0.964745316 | 0.599202381 |
| M689T103    | 0.590962877 | 0.964736213 | 0.599118836 |
| M315T119    | 0.59092035  | 0.96472259  | 0.598993835 |
| M1156T425   | 0.590835181 | 0.964695248 | 0.598742971 |
| M432T79     | 0.590797929 | 0.964683273 | 0.59863311  |
| M659T212    | 0.590738385 | 0.96466409  | 0.598457112 |
| M169T35_2   | 0.59058424  | 0.964614336 | 0.598000819 |
| M267T286    | 0.590502532 | 0.964587875 | 0.597758212 |
| M1009T79    | 0.590332216 | 0.964532525 | 0.597250808 |
| M531T230    | 0.590232476 | 0.964499991 | 0.596952651 |
| M477T268    | 0.590170606 | 0.964479769 | 0.596767363 |
| M289T399    | 0.590043885 | 0.964438121 | 0.596385615 |
| M385T215_2  | 0.589895275 | 0.96438935  | 0.595939121 |
| M193T314    | 0.589860751 | 0.964377962 | 0.595834843 |
| M537T32     | 0.589577789 | 0.964283734 | 0.594971442 |
| M137T213    | 0.589417192 | 0.964230696 | 0.594486934 |
| M550T92     | 0.589358918 | 0.964211046 | 0.594306907 |
| M519T110    | 0.589340036 | 0.96420489  | 0.594250842 |
| M458T26_1   | 0.589198902 | 0.964157536 | 0.593817736 |
| M373T432    | 0.58919458  | 0.964156085 | 0.593804469 |
| M675T214_1  | 0.589160436 | 0.964144599 | 0.593699429 |
| M513T92     | 0.589110972 | 0.96412791  | 0.593546777 |
| M208T108    | 0.589081549 | 0.964118001 | 0.593456199 |
| M1153T422_1 | 0.58904839  | 0.964106581 | 0.593351417 |
| M255T210    | 0.58902791  | 0.964099891 | 0.593290618 |
| M557T337    | 0.588982814 | 0.964084659 | 0.593151394 |
| M225T75     | 0.588975659 | 0.964082245 | 0.593129341 |
| M347T48     | 0.588762661 | 0.964009951 | 0.592468628 |
| M293T113    | 0.588760673 | 0.96400925  | 0.592462176 |
| M609T351    | 0.588756235 | 0.96400776  | 0.592448599 |
| M516T346    | 0.588642321 | 0.963968908 | 0.59209365  |
| M519T38     | 0.588514793 | 0.963925249 | 0.591694856 |
| M558T348    | 0.58841421  | 0.963890703 | 0.5913794   |

|            |             |             |             |
|------------|-------------|-------------|-------------|
| M351T358   | 0.588231687 | 0.963827737 | 0.590804521 |
| M407T62    | 0.588211207 | 0.96382064  | 0.590739729 |
| M231T323   | 0.588181899 | 0.963810496 | 0.590647154 |
| M167T59    | 0.588159564 | 0.963802738 | 0.590576312 |
| M638T313   | 0.588155321 | 0.963801212 | 0.590562302 |
| M459T203   | 0.5879864   | 0.963741325 | 0.59001401  |
| M158T179   | 0.587844938 | 0.963693162 | 0.589576573 |
| M358T38    | 0.587807086 | 0.96353278  | 0.587887279 |
| M263T231   | 0.587804042 | 0.963678837 | 0.589445912 |
| M415T104   | 0.58775828  | 0.963662787 | 0.589299531 |
| M85T111    | 0.587741194 | 0.963656647 | 0.589243318 |
| M1049T82   | 0.587695205 | 0.963640624 | 0.589097415 |
| M689T242   | 0.587690014 | 0.963638803 | 0.589080819 |
| M261T135   | 0.587672922 | 0.963632791 | 0.589025997 |
| M923T422_1 | 0.587655783 | 0.963626747 | 0.588970868 |
| M360T259_1 | 0.587614585 | 0.963612239 | 0.588838611 |
| M134T250   | 0.587430444 | 0.963546839 | 0.58824198  |
| M260T246   | 0.587428105 | 0.963546303 | 0.588237551 |
| M131T113   | 0.587328635 | 0.963508252 | 0.587886626 |
| M204T113   | 0.587293016 | 0.963498293 | 0.587800045 |
| M1008T180  | 0.587188823 | 0.963461113 | 0.587461279 |
| M215T328   | 0.587135264 | 0.963439199 | 0.587257458 |
| M243T325   | 0.587012136 | 0.963411814 | 0.587012136 |
| M228T168   | 0.586658261 | 0.963392622 | 0.586658261 |
| M260T82    | 0.586468535 | 0.963352122 | 0.586468535 |
| M848T131   | 0.586453471 | 0.96335046  | 0.586453471 |
| M423T123   | 0.58642738  | 0.963347713 | 0.58642738  |
| M174T225   | 0.586328398 | 0.963336717 | 0.586328398 |
| M680T175   | 0.586111556 | 0.963312896 | 0.586111556 |
| M761T99    | 0.586052981 | 0.963306571 | 0.586052981 |
| M142T23    | 0.586044255 | 0.963305505 | 0.586044255 |
| M362T36    | 0.584249549 | 0.963108244 | 0.584249549 |
| M964T31_2  | 0.584160628 | 0.963098785 | 0.584160628 |
| M460T316   | 0.58361971  | 0.96303897  | 0.58361971  |
| M347T59    | 0.583363826 | 0.963010822 | 0.583363826 |
| M447T210   | 0.583245179 | 0.962997766 | 0.583245179 |
| M917T175   | 0.582629702 | 0.962930065 | 0.582629702 |
| M468T169   | 0.582301427 | 0.962893903 | 0.582301427 |
| M553T81    | 0.581668442 | 0.962824211 | 0.581668442 |
| M181T53_2  | 0.581005857 | 0.962751238 | 0.581005857 |
| M323T423   | 0.580894848 | 0.96273925  | 0.580894848 |
| M523T50    | 0.580617892 | 0.962708496 | 0.580617892 |
| M191T585   | 0.580508754 | 0.962696484 | 0.580508754 |

|            |             |             |             |
|------------|-------------|-------------|-------------|
| M381T257   | 0.580428329 | 0.962687612 | 0.580428329 |
| M772T54    | 0.580071248 | 0.962648261 | 0.580071248 |
| M488T28    | 0.580009677 | 0.962641476 | 0.580009677 |
| M1060T178  | 0.579781394 | 0.962616315 | 0.579781394 |
| M1035T185  | 0.579719458 | 0.962609489 | 0.579719458 |
| M857T70    | 0.579653831 | 0.962602253 | 0.579653831 |
| M264T311   | 0.579619506 | 0.962598481 | 0.579619506 |
| M942T448_1 | 0.579304985 | 0.962563987 | 0.579304985 |
| M555T351   | 0.579161669 | 0.962548    | 0.579161669 |
| M1078T34   | 0.579149514 | 0.962546655 | 0.579149514 |
| M166T319   | 0.579115944 | 0.962542955 | 0.579115944 |
| M758T200_1 | 0.578922593 | 0.962521633 | 0.578922593 |
| M136T286   | 0.578781034 | 0.962506023 | 0.578781034 |
| M209T53    | 0.578656613 | 0.962492309 | 0.578656613 |
| M407T176   | 0.578337093 | 0.962457072 | 0.578337093 |
| M206T285   | 0.578128228 | 0.962434027 | 0.578128228 |
| M357T412   | 0.578102432 | 0.962431175 | 0.578102432 |
| M282T26_2  | 0.577924719 | 0.96241157  | 0.577924719 |
| M641T32    | 0.577843374 | 0.962402597 | 0.577843374 |
| M431T137   | 0.577485944 | 0.962363159 | 0.577485944 |
| M430T345   | 0.577036817 | 0.962313593 | 0.577036817 |
| M1000T35   | 0.577036805 | 0.962313592 | 0.577036805 |
| M327T392   | 0.576748703 | 0.962281805 | 0.576748703 |
| M833T89    | 0.576735523 | 0.962280337 | 0.576735523 |
| M240T233   | 0.576370114 | 0.962239998 | 0.576370114 |
| M577T310   | 0.57607331  | 0.962207224 | 0.57607331  |
| M354T430   | 0.575837072 | 0.962181138 | 0.575837072 |
| M227T34    | 0.575699658 | 0.962165988 | 0.575699658 |
| M698T210   | 0.575670301 | 0.962162721 | 0.575670301 |
| M255T45    | 0.575375812 | 0.962130195 | 0.575375812 |
| M432T204   | 0.574950836 | 0.962083653 | 0.574950836 |
| M111T318   | 0.57462939  | 0.962047733 | 0.57462939  |
| M757T112   | 0.573695429 | 0.961944515 | 0.573695429 |
| M1140T37   | 0.573656813 | 0.961940434 | 0.573656813 |
| M221T235   | 0.572873763 | 0.961853673 | 0.572873763 |
| M468T345   | 0.572840269 | 0.961849981 | 0.572840269 |
| M386T39    | 0.572817814 | 0.961847712 | 0.572817814 |
| M922T422_3 | 0.572513501 | 0.961813845 | 0.572513501 |
| M743T364   | 0.572427797 | 0.961804387 | 0.572427797 |
| M964T167   | 0.572009945 | 0.961758138 | 0.572009945 |
| M769T169   | 0.571878143 | 0.961743555 | 0.571878143 |
| M243T56    | 0.571653036 | 0.961718665 | 0.571653036 |
| M121T231   | 0.571623659 | 0.961715403 | 0.571623659 |

|            |             |             |             |
|------------|-------------|-------------|-------------|
| M404T205   | 0.571521871 | 0.961704141 | 0.571521871 |
| M1009T178  | 0.571344351 | 0.961684499 | 0.571344351 |
| M666T32    | 0.570935291 | 0.961639608 | 0.570935291 |
| M472T103   | 0.570468053 | 0.961587521 | 0.570468053 |
| M390T346   | 0.570297973 | 0.961568694 | 0.570297973 |
| M315T454   | 0.570146004 | 0.961551871 | 0.570146004 |
| M1147T39   | 0.570119203 | 0.961548936 | 0.570119203 |
| M465T210   | 0.56987441  | 0.961521803 | 0.56987441  |
| M449T344   | 0.569707706 | 0.961503347 | 0.569707706 |
| M520T153   | 0.569594113 | 0.961490781 | 0.569594113 |
| M362T222   | 0.56957978  | 0.961489371 | 0.56957978  |
| M315T229   | 0.569231522 | 0.961450617 | 0.569231522 |
| M930T78    | 0.569129284 | 0.961439295 | 0.569129284 |
| M307T53    | 0.568748742 | 0.961397148 | 0.568748742 |
| M384T271   | 0.5687103   | 0.961393029 | 0.5687103   |
| M434T115   | 0.56865475  | 0.961386737 | 0.56865475  |
| M793T89    | 0.568431059 | 0.96136212  | 0.568431059 |
| M565T317   | 0.568217849 | 0.961338339 | 0.568217849 |
| M233T264   | 0.568102237 | 0.961325531 | 0.568102237 |
| M166T376   | 0.567969445 | 0.961310827 | 0.567969445 |
| M696T283   | 0.567852201 | 0.96129785  | 0.567852201 |
| M193T267   | 0.567582299 | 0.961267921 | 0.567582299 |
| M159T35    | 0.567448882 | 0.961253137 | 0.567448882 |
| M327T49    | 0.566993439 | 0.961202669 | 0.566993439 |
| M207T33    | 0.566681155 | 0.961168048 | 0.566681155 |
| M221T231   | 0.566498393 | 0.961147806 | 0.566498393 |
| M578T134   | 0.56638028  | 0.9611347   | 0.56638028  |
| M503T225   | 0.566332749 | 0.961129427 | 0.566332749 |
| M831T540   | 0.566243468 | 0.961119528 | 0.566243468 |
| M521T215   | 0.566093507 | 0.961103356 | 0.566093507 |
| M693T32_3  | 0.5656431   | 0.961052961 | 0.5656431   |
| M703T56_1  | 0.565539277 | 0.96104145  | 0.565539277 |
| M927T423   | 0.565525789 | 0.961039953 | 0.565525789 |
| M520T169_2 | 0.565291141 | 0.961013932 | 0.565291141 |
| M619T214   | 0.565094985 | 0.960992177 | 0.565094985 |
| M206T157   | 0.564642011 | 0.960941935 | 0.564642011 |
| M379T309   | 0.564306624 | 0.96090473  | 0.564306624 |
| M924T34    | 0.564204206 | 0.960893368 | 0.564204206 |
| M268T25    | 0.56419189  | 0.960892026 | 0.56419189  |
| M418T232   | 0.563827381 | 0.960851561 | 0.563827381 |
| M1039T49   | 0.563362561 | 0.960799991 | 0.563362561 |
| M309T393   | 0.563288949 | 0.960791814 | 0.563288949 |
| M201T234   | 0.563075318 | 0.960768106 | 0.563075318 |

|             |             |             |             |
|-------------|-------------|-------------|-------------|
| M883T182    | 0.563006851 | 0.960760568 | 0.563006851 |
| M433T34     | 0.562920886 | 0.960750971 | 0.562920886 |
| M446T290    | 0.562822208 | 0.960740054 | 0.562822208 |
| M599T168    | 0.56194684  | 0.960642885 | 0.56194684  |
| M93T231     | 0.561881425 | 0.960635583 | 0.561881425 |
| M693T247    | 0.561436184 | 0.960586166 | 0.561436184 |
| M233T53     | 0.561322757 | 0.96057357  | 0.561322757 |
| M1029T401   | 0.561284879 | 0.960569377 | 0.561284879 |
| M114T310    | 0.560783678 | 0.96051369  | 0.560783678 |
| M429T214    | 0.560510114 | 0.960483307 | 0.560510114 |
| M473T236    | 0.5602238   | 0.960451507 | 0.5602238   |
| M578T36     | 0.560176568 | 0.96044626  | 0.560176568 |
| M783T89     | 0.559740149 | 0.960397805 | 0.559740149 |
| M720T26_1   | 0.559730579 | 0.96039672  | 0.559730579 |
| M340T498    | 0.559472166 | 0.960367999 | 0.559472166 |
| M581T115    | 0.559369091 | 0.960356562 | 0.559369091 |
| M694T190    | 0.559038498 | 0.960319905 | 0.559038498 |
| M257T64     | 0.558987904 | 0.96031421  | 0.558987904 |
| M86T46      | 0.558889117 | 0.960303234 | 0.558889117 |
| M438T109    | 0.558825399 | 0.960296152 | 0.558825399 |
| M343T200    | 0.558683944 | 0.960280432 | 0.558683944 |
| M376T76     | 0.558382021 | 0.960246895 | 0.558382021 |
| M1153T422_4 | 0.558344265 | 0.960242715 | 0.558344265 |
| M744T81     | 0.558161124 | 0.960222396 | 0.558161124 |
| M449T173    | 0.558073758 | 0.960212627 | 0.558073758 |
| M220T32     | 0.55805992  | 0.960211087 | 0.55805992  |
| M204T90     | 0.557971174 | 0.960201225 | 0.557971174 |
| M576T230    | 0.557790287 | 0.960181152 | 0.557790287 |
| M901T54     | 0.557754526 | 0.960177148 | 0.557754526 |
| M506T345    | 0.557514412 | 0.960150458 | 0.557514412 |
| M322T423    | 0.557232599 | 0.960119133 | 0.557232599 |
| M1051T185   | 0.557168651 | 0.960112026 | 0.557168651 |
| M749T112    | 0.557058464 | 0.960099866 | 0.557058464 |
| M143T153    | 0.556887858 | 0.960080809 | 0.556887858 |
| M579T595    | 0.556868867 | 0.9600787   | 0.556868867 |
| M226T76     | 0.55678205  | 0.960069048 | 0.55678205  |
| M1116T54    | 0.556671695 | 0.960056799 | 0.556671695 |
| M589T170    | 0.556630399 | 0.960052259 | 0.556630399 |
| M221T87     | 0.556566301 | 0.960045062 | 0.556566301 |
| M159T110    | 0.556268743 | 0.960011985 | 0.556268743 |
| M203T405    | 0.55603769  | 0.95998629  | 0.55603769  |
| M314T454_1  | 0.556026869 | 0.959985086 | 0.556026869 |
| M156T168    | 0.555904099 | 0.959971437 | 0.555904099 |

|            |             |             |             |
|------------|-------------|-------------|-------------|
| M667T200   | 0.55518599  | 0.959891616 | 0.55518599  |
| M499T35    | 0.554999587 | 0.959870875 | 0.554999587 |
| M439T271   | 0.554885958 | 0.959858279 | 0.554885958 |
| M121T45    | 0.554827782 | 0.959851744 | 0.554827782 |
| M496T174   | 0.554687693 | 0.959836165 | 0.554687693 |
| M511T351   | 0.553700287 | 0.959726334 | 0.553700287 |
| M305T60    | 0.553693186 | 0.959725546 | 0.553693186 |
| M314T454_2 | 0.553243258 | 0.959675492 | 0.553243258 |
| M619T66    | 0.552885706 | 0.959635846 | 0.552885706 |
| M303T180   | 0.55272544  | 0.959617886 | 0.55272544  |
| M252T27_2  | 0.552707299 | 0.959616128 | 0.552707299 |
| M295T345   | 0.552672843 | 0.959612032 | 0.552672843 |
| M324T128   | 0.552604761 | 0.959604661 | 0.552604761 |
| M547T120   | 0.5524556   | 0.959587858 | 0.5524556   |
| M948T39    | 0.552195448 | 0.959559072 | 0.552195448 |
| M944T228   | 0.552048945 | 0.95954261  | 0.552048945 |
| M896T57    | 0.551903321 | 0.95952641  | 0.551903321 |
| M140T55    | 0.551506772 | 0.959482481 | 0.551506772 |
| M607T33    | 0.551450841 | 0.959476054 | 0.551450841 |
| M580T348   | 0.551350524 | 0.959464888 | 0.551350524 |
| M128T59    | 0.551302843 | 0.959459584 | 0.551302843 |
| M436T104   | 0.550974662 | 0.959423062 | 0.550974662 |
| M761T89    | 0.550951305 | 0.95942048  | 0.550951305 |
| M424T33    | 0.550417132 | 0.959361011 | 0.550417132 |
| M341T200_1 | 0.550254601 | 0.959342917 | 0.550254601 |
| M213T104_2 | 0.549970225 | 0.959311267 | 0.549970225 |
| M520T317   | 0.549821253 | 0.959294685 | 0.549821253 |
| M743T81    | 0.549504916 | 0.959259473 | 0.549504916 |
| M328T315   | 0.54948076  | 0.959256787 | 0.54948076  |
| M239T40    | 0.549229674 | 0.959228848 | 0.549229674 |
| M407T183   | 0.549138918 | 0.959218733 | 0.549138918 |
| M673T34_2  | 0.548979042 | 0.959200939 | 0.548979042 |
| M773T155   | 0.548929338 | 0.959195401 | 0.548929338 |
| M723T36    | 0.548620528 | 0.959161027 | 0.548620528 |
| M207T32_1  | 0.548585353 | 0.959157108 | 0.548585353 |
| M526T36    | 0.54850082  | 0.959147696 | 0.54850082  |
| M217T278   | 0.548183318 | 0.959112466 | 0.548183318 |
| M441T28_1  | 0.547965156 | 0.95908806  | 0.547965156 |
| M677T201   | 0.547762553 | 0.959065505 | 0.547762553 |
| M387T32    | 0.547361259 | 0.959020826 | 0.547361259 |
| M237T24    | 0.547297353 | 0.959013712 | 0.547297353 |
| M247T34    | 0.547165582 | 0.95899911  | 0.547165582 |
| M585T169   | 0.546163529 | 0.958887477 | 0.546163529 |

|             |             |             |             |
|-------------|-------------|-------------|-------------|
| M1132T55    | 0.546016753 | 0.958871354 | 0.546016753 |
| M699T33_2   | 0.545551055 | 0.958819268 | 0.545551055 |
| M363T390    | 0.545521677 | 0.958815991 | 0.545521677 |
| M410T209    | 0.545497692 | 0.958813319 | 0.545497692 |
| M289T59     | 0.545206006 | 0.958780841 | 0.545206006 |
| M483T26     | 0.545162236 | 0.958775967 | 0.545162236 |
| M451T175    | 0.544838451 | 0.95873991  | 0.544838451 |
| M579T37     | 0.544227466 | 0.958671869 | 0.544227466 |
| M986T167    | 0.543984878 | 0.958644859 | 0.543984878 |
| M1138T59    | 0.543657569 | 0.958608402 | 0.543657569 |
| M284T34_2   | 0.543538141 | 0.958595101 | 0.543538141 |
| M235T64     | 0.54350844  | 0.958591798 | 0.54350844  |
| M465T263    | 0.543481007 | 0.958588739 | 0.543481007 |
| M147T299    | 0.543360772 | 0.958576599 | 0.543360772 |
| M1191T422_1 | 0.543267908 | 0.958565005 | 0.543267908 |
| M885T53     | 0.543209573 | 0.958558605 | 0.543209573 |
| M72T233     | 0.543194053 | 0.958577499 | 0.543194053 |
| M349T292    | 0.54315028  | 0.95855191  | 0.54315028  |
| M585T112    | 0.543132872 | 0.958549969 | 0.543132872 |
| M362T347    | 0.543089275 | 0.958545113 | 0.543089275 |
| M310T311    | 0.542263804 | 0.958453183 | 0.542263804 |
| M109T57     | 0.541800889 | 0.958401628 | 0.541800889 |
| M559T336    | 0.541481239 | 0.9583661   | 0.541481239 |
| M728T36     | 0.541299452 | 0.958345782 | 0.541299452 |
| M854T352    | 0.541100708 | 0.958323666 | 0.541100708 |
| M896T145    | 0.541025097 | 0.958315263 | 0.541025097 |
| M255T288    | 0.540864482 | 0.958297406 | 0.540864482 |
| M369T203    | 0.540544227 | 0.958262122 | 0.540544227 |
| M373T35     | 0.540347533 | 0.958239772 | 0.540347533 |
| M662T200    | 0.540303082 | 0.95823482  | 0.540303082 |
| M751T292    | 0.540044563 | 0.958206058 | 0.540044563 |
| M611T413    | 0.539882674 | 0.958188157 | 0.539882674 |
| M313T158    | 0.539561838 | 0.95815231  | 0.539561838 |
| M489T26     | 0.539468522 | 0.958141881 | 0.539468522 |
| M672T213    | 0.539422763 | 0.958136782 | 0.539422763 |
| M595T463    | 0.539149575 | 0.958106365 | 0.539149575 |
| M289T34     | 0.539112482 | 0.958102228 | 0.539112482 |
| M202T278    | 0.538890523 | 0.958077516 | 0.538890523 |
| M439T122    | 0.537886788 | 0.957965742 | 0.537886788 |
| M336T214    | 0.537830339 | 0.957959453 | 0.537830339 |
| M570T313    | 0.537719419 | 0.957947111 | 0.537719419 |
| M993T169    | 0.537633893 | 0.957937584 | 0.537633893 |
| M326T40     | 0.536420879 | 0.957802509 | 0.536420879 |

|            |             |             |             |
|------------|-------------|-------------|-------------|
| M927T422_5 | 0.536192937 | 0.957777129 | 0.536192937 |
| M833T37    | 0.535919687 | 0.957746705 | 0.535919687 |
| M695T247   | 0.535571064 | 0.957707892 | 0.535571064 |
| M457T69    | 0.535570126 | 0.957707788 | 0.535570126 |
| M473T26    | 0.53480335  | 0.957622446 | 0.53480335  |
| M425T541   | 0.534766607 | 0.957618351 | 0.534766607 |
| M427T300   | 0.534494947 | 0.957588091 | 0.534494947 |
| M119T169   | 0.534349294 | 0.957571879 | 0.534349294 |
| M740T171   | 0.534159289 | 0.957550805 | 0.534159289 |
| M807T138   | 0.533843378 | 0.957515562 | 0.533843378 |
| M177T242   | 0.533658687 | 0.957495004 | 0.533658687 |
| M519T169_1 | 0.533555342 | 0.95748351  | 0.533555342 |
| M149T257   | 0.533478699 | 0.957474979 | 0.533478699 |
| M1084T80   | 0.533354581 | 0.957461157 | 0.533354581 |
| M903T210   | 0.533131574 | 0.957436382 | 0.533131574 |
| M635T414   | 0.533128185 | 0.957435961 | 0.533128185 |
| M528T34    | 0.532843628 | 0.957404991 | 0.532843628 |
| M465T213   | 0.532782465 | 0.957397483 | 0.532782465 |
| M595T292   | 0.532624734 | 0.957379929 | 0.532624734 |
| M754T348   | 0.532542024 | 0.957370724 | 0.532542024 |
| M188T285   | 0.532391992 | 0.957354029 | 0.532391992 |
| M231T81    | 0.53235674  | 0.957350164 | 0.53235674  |
| M552T152   | 0.531763568 | 0.957284097 | 0.531763568 |
| M301T42    | 0.531750282 | 0.957282637 | 0.531750282 |
| M395T35    | 0.53171655  | 0.957278875 | 0.53171655  |
| M164T513   | 0.5312894   | 0.957231642 | 0.5312894   |
| M230T162   | 0.531267985 | 0.95722896  | 0.531267985 |
| M233T314   | 0.531095882 | 0.957209806 | 0.531095882 |
| M368T221   | 0.530140523 | 0.957103524 | 0.530140523 |
| M149T49    | 0.529578861 | 0.957041051 | 0.529578861 |
| M172T53    | 0.529519634 | 0.957034464 | 0.529519634 |
| M237T356   | 0.529439939 | 0.9570256   | 0.529439939 |
| M699T204   | 0.529431718 | 0.957024715 | 0.529431718 |
| M360T116_1 | 0.529348903 | 0.957015476 | 0.529348903 |
| M875T39    | 0.529283093 | 0.957008237 | 0.529283093 |
| M145T169   | 0.529169979 | 0.956995579 | 0.529169979 |
| M460T26    | 0.528902935 | 0.956966172 | 0.528902935 |
| M215T31    | 0.528831127 | 0.956957893 | 0.528831127 |
| M294T269   | 0.52880561  | 0.956955068 | 0.52880561  |
| M665T38    | 0.528802405 | 0.956954839 | 0.528802405 |
| M968T78    | 0.52818293  | 0.956885958 | 0.52818293  |
| M791T200   | 0.528112152 | 0.956877945 | 0.528112152 |
| M668T36    | 0.528050484 | 0.956871208 | 0.528050484 |

|            |             |             |             |
|------------|-------------|-------------|-------------|
| M91T231    | 0.527874515 | 0.956851526 | 0.527874515 |
| M166T177   | 0.527781133 | 0.956841144 | 0.527781133 |
| M149T114   | 0.527667647 | 0.956828529 | 0.527667647 |
| M1111T172  | 0.52731609  | 0.956789497 | 0.52731609  |
| M193T354   | 0.527115767 | 0.956767465 | 0.527115767 |
| M677T31    | 0.526900277 | 0.956743576 | 0.526900277 |
| M985T179   | 0.526770477 | 0.956728801 | 0.526770477 |
| M428T346   | 0.526685149 | 0.95671932  | 0.526685149 |
| M86T497    | 0.526643078 | 0.95671464  | 0.526643078 |
| M455T33    | 0.526471632 | 0.956695584 | 0.526471632 |
| M437T85    | 0.526392325 | 0.956687258 | 0.526392325 |
| M117T304   | 0.526375119 | 0.956684859 | 0.526375119 |
| M322T103   | 0.526321414 | 0.956679074 | 0.526321414 |
| M852T349   | 0.526293254 | 0.956675761 | 0.526293254 |
| M298T499   | 0.526114656 | 0.956655914 | 0.526114656 |
| M264T150   | 0.526080732 | 0.956652148 | 0.526080732 |
| M549T595   | 0.525949987 | 0.95663762  | 0.525949987 |
| M439T393   | 0.525555729 | 0.956593809 | 0.525555729 |
| M680T499   | 0.525360839 | 0.956572157 | 0.525360839 |
| M314T220   | 0.525284056 | 0.956563764 | 0.525284056 |
| M659T169_2 | 0.525227747 | 0.956557371 | 0.525227747 |
| M737T44    | 0.52490782  | 0.956521848 | 0.52490782  |
| M847T85    | 0.524294009 | 0.956453655 | 0.524294009 |
| M932T353   | 0.524281489 | 0.956452262 | 0.524281489 |
| M441T169   | 0.524084744 | 0.956430412 | 0.524084744 |
| M835T168   | 0.523970338 | 0.95641771  | 0.523970338 |
| M534T176   | 0.523832181 | 0.956402776 | 0.523832181 |
| M396T106   | 0.523825243 | 0.956401597 | 0.523825243 |
| M225T109   | 0.523644604 | 0.956381554 | 0.523644604 |
| M237T64    | 0.52363961  | 0.956380985 | 0.52363961  |
| M332T258   | 0.523474827 | 0.956362686 | 0.523474827 |
| M173T299   | 0.523133206 | 0.956324757 | 0.523133206 |
| M229T118   | 0.522934656 | 0.956302723 | 0.522934656 |
| M209T106   | 0.522851076 | 0.956293457 | 0.522851076 |
| M273T55    | 0.522421085 | 0.956245705 | 0.522421085 |
| M425T35    | 0.522406872 | 0.956244132 | 0.522406872 |
| M930T423_4 | 0.522061241 | 0.956205778 | 0.522061241 |
| M784T89    | 0.522039188 | 0.956203328 | 0.522039188 |
| M230T306   | 0.522017391 | 0.956200906 | 0.522017391 |
| M421T111   | 0.521981869 | 0.956196968 | 0.521981869 |
| M451T298   | 0.521621032 | 0.956156929 | 0.521621032 |
| M1096T110  | 0.521589605 | 0.956153443 | 0.521589605 |
| M531T32    | 0.521451905 | 0.956138165 | 0.521451905 |

|            |             |             |             |
|------------|-------------|-------------|-------------|
| M750T169   | 0.521448803 | 0.956137817 | 0.521448803 |
| M350T83    | 0.521216421 | 0.956112039 | 0.521216421 |
| M813T129   | 0.52121248  | 0.956111616 | 0.52121248  |
| M387T258   | 0.521198081 | 0.956110003 | 0.521198081 |
| M615T35    | 0.521014308 | 0.956089638 | 0.521014308 |
| M316T240   | 0.520996078 | 0.956087594 | 0.520996078 |
| M791T70    | 0.520679477 | 0.956052502 | 0.520679477 |
| M734T69    | 0.520665982 | 0.956051395 | 0.520665982 |
| M275T246   | 0.520606155 | 0.95604437  | 0.520606155 |
| M201T255   | 0.520490984 | 0.956031573 | 0.520490984 |
| M379T292   | 0.520331849 | 0.956013925 | 0.520331849 |
| M402T103   | 0.520129147 | 0.955991445 | 0.520129147 |
| M1133T54   | 0.519887859 | 0.955964692 | 0.519887859 |
| M330T39    | 0.51971316  | 0.955945358 | 0.51971316  |
| M569T201   | 0.519707601 | 0.955945168 | 0.519707601 |
| M874T349   | 0.519597958 | 0.955932551 | 0.519597958 |
| M283T292   | 0.519496694 | 0.955921325 | 0.519496694 |
| M536T100   | 0.519483137 | 0.9559198   | 0.519483137 |
| M185T151   | 0.519423233 | 0.95591318  | 0.519423233 |
| M931T422_4 | 0.519062392 | 0.95587349  | 0.519062392 |
| M275T56    | 0.518923352 | 0.955857805 | 0.518923352 |
| M874T39    | 0.518877363 | 0.955852681 | 0.518877363 |
| M221T109   | 0.518531    | 0.955814298 | 0.518531    |
| M160T242   | 0.518517351 | 0.955812782 | 0.518517351 |
| M1002T167  | 0.518342148 | 0.955793369 | 0.518342148 |
| M890T39    | 0.518046899 | 0.955760732 | 0.518046899 |
| M803T169   | 0.517963736 | 0.955751449 | 0.517963736 |
| M255T242   | 0.517922234 | 0.955746847 | 0.517922234 |
| M299T41    | 0.517648113 | 0.955716489 | 0.517648113 |
| M418T110   | 0.517111018 | 0.955657003 | 0.517111018 |
| M873T129   | 0.516440647 | 0.955582785 | 0.516440647 |
| M520T205   | 0.515934244 | 0.955526757 | 0.515934244 |
| M337T380   | 0.515878259 | 0.955520539 | 0.515878259 |
| M710T36    | 0.515869482 | 0.955519573 | 0.515869482 |
| M679T256   | 0.515823865 | 0.95551452  | 0.515823865 |
| M489T160   | 0.515811219 | 0.955513123 | 0.515811219 |
| M649T320   | 0.515658799 | 0.955496255 | 0.515658799 |
| M119T462   | 0.515455124 | 0.955473724 | 0.515455124 |
| M654T260   | 0.515369027 | 0.955464197 | 0.515369027 |
| M379T37    | 0.515140958 | 0.955438962 | 0.515140958 |
| M984T176   | 0.515124511 | 0.955437143 | 0.515124511 |
| M261T92    | 0.514850871 | 0.955406878 | 0.514850871 |
| M305T83    | 0.514840292 | 0.955405763 | 0.514840292 |

|            |             |             |             |
|------------|-------------|-------------|-------------|
| M457T204   | 0.514827026 | 0.955404398 | 0.514827026 |
| M537T33    | 0.514738344 | 0.955394429 | 0.514738344 |
| M306T36    | 0.5146176   | 0.95538108  | 0.5146176   |
| M425T581   | 0.513949158 | 0.955307169 | 0.513949158 |
| M851T78    | 0.513446476 | 0.95525161  | 0.513446476 |
| M797T198   | 0.512892212 | 0.955190363 | 0.512892212 |
| M480T274   | 0.512880654 | 0.955189088 | 0.512880654 |
| M225T26    | 0.512765876 | 0.955176415 | 0.512765876 |
| M866T35    | 0.512590669 | 0.955157226 | 0.512590669 |
| M609T50    | 0.512467097 | 0.955143404 | 0.512467097 |
| M392T345   | 0.512409105 | 0.955137014 | 0.512409105 |
| M685T346   | 0.512272427 | 0.955121904 | 0.512272427 |
| M715T211   | 0.512200275 | 0.955113936 | 0.512200275 |
| M462T315   | 0.511815787 | 0.955071484 | 0.511815787 |
| M1041T82   | 0.511495899 | 0.955036179 | 0.511495899 |
| M360T344   | 0.511439721 | 0.955029978 | 0.511439721 |
| M374T255   | 0.51128209  | 0.955012588 | 0.51128209  |
| M186T26    | 0.51121857  | 0.955005561 | 0.51121857  |
| M467T138_2 | 0.511171277 | 0.955000342 | 0.511171277 |
| M397T56    | 0.510934749 | 0.95497522  | 0.510934749 |
| M373T42    | 0.510572158 | 0.954934235 | 0.510572158 |
| M391T255   | 0.510420737 | 0.954917554 | 0.510420737 |
| M686T34    | 0.510355155 | 0.9549103   | 0.510355155 |
| M675T66    | 0.510345271 | 0.954909215 | 0.510345271 |
| M738T52    | 0.510092531 | 0.954881336 | 0.510092531 |
| M220T117   | 0.510084873 | 0.954880522 | 0.510084873 |
| M766T81_2  | 0.51004136  | 0.954875693 | 0.51004136  |
| M730T56    | 0.509907796 | 0.954860961 | 0.509907796 |
| M229T41    | 0.50966163  | 0.954833829 | 0.50966163  |
| M917T55    | 0.509470283 | 0.954812714 | 0.509470283 |
| M978T31    | 0.509466767 | 0.954812343 | 0.509466767 |
| M605T168   | 0.509303493 | 0.954794342 | 0.509303493 |
| M495T53    | 0.50923888  | 0.954787222 | 0.50923888  |
| M286T248   | 0.509090815 | 0.954770909 | 0.509090815 |
| M218T34    | 0.50885081  | 0.954744612 | 0.50885081  |
| M320T346   | 0.508806912 | 0.954739615 | 0.508806912 |
| M779T53    | 0.5087992   | 0.954738839 | 0.5087992   |
| M458T242   | 0.508792579 | 0.954738038 | 0.508792579 |
| M502T36    | 0.508596915 | 0.954716482 | 0.508596915 |
| M247T263   | 0.508374407 | 0.954691972 | 0.508374407 |
| M267T220   | 0.508356832 | 0.954690032 | 0.508356832 |
| M331T305   | 0.508262531 | 0.95467965  | 0.508262531 |
| M114T181   | 0.508148032 | 0.954667211 | 0.508148032 |

|            |             |             |             |
|------------|-------------|-------------|-------------|
| M283T539   | 0.508018509 | 0.954652774 | 0.508018509 |
| M142T299   | 0.507867425 | 0.954636139 | 0.507867425 |
| M515T151   | 0.507810965 | 0.954629921 | 0.507810965 |
| M517T326   | 0.507599445 | 0.954606632 | 0.507599445 |
| M342T333   | 0.50748973  | 0.954594558 | 0.50748973  |
| M322T256   | 0.507233432 | 0.954566346 | 0.507233432 |
| M593T292   | 0.507123871 | 0.954554723 | 0.507123871 |
| M930T423_1 | 0.50704525  | 0.954545649 | 0.50704525  |
| M346T424   | 0.506959943 | 0.954536445 | 0.506959943 |
| M365T230   | 0.506724943 | 0.954510393 | 0.506724943 |
| M979T168_2 | 0.506623371 | 0.95449922  | 0.506623371 |
| M309T169   | 0.506538077 | 0.954489839 | 0.506538077 |
| M681T33    | 0.506378505 | 0.954472613 | 0.506378505 |
| M292T540_1 | 0.506084009 | 0.954439902 | 0.506084009 |
| M282T92    | 0.505967608 | 0.954427124 | 0.505967608 |
| M105T37    | 0.505585569 | 0.954385104 | 0.505585569 |
| M854T348   | 0.50526185  | 0.954349825 | 0.50526185  |
| M312T34    | 0.505255236 | 0.954348805 | 0.505255236 |
| M273T221   | 0.504884206 | 0.954308036 | 0.504884206 |
| M116T309   | 0.504750479 | 0.954293346 | 0.504750479 |
| M670T199   | 0.504206995 | 0.954233661 | 0.504206995 |
| M336T35_2  | 0.504090454 | 0.954220866 | 0.504090454 |
| M460T348   | 0.504035025 | 0.954215298 | 0.504035025 |
| M771T154   | 0.503991576 | 0.954210014 | 0.503991576 |
| M919T55    | 0.503759281 | 0.954184518 | 0.503759281 |
| M374T310   | 0.503188322 | 0.954121895 | 0.503188322 |
| M588T155   | 0.502708463 | 0.954069242 | 0.502708463 |
| M407T150   | 0.502512743 | 0.954047855 | 0.502512743 |
| M192T678   | 0.501889569 | 0.953979484 | 0.501889569 |
| M339T294   | 0.501832693 | 0.953973249 | 0.501832693 |
| M144T352   | 0.501791668 | 0.953968759 | 0.501791668 |
| M945T465_2 | 0.50172559  | 0.953961515 | 0.50172559  |
| M325T186   | 0.501691081 | 0.953957738 | 0.501691081 |
| M243T297   | 0.501421438 | 0.953928202 | 0.501421438 |
| M938T32    | 0.500758665 | 0.953855635 | 0.500758665 |
| M877T127   | 0.500578233 | 0.953835885 | 0.500578233 |
| M314T467   | 0.500568106 | 0.953834779 | 0.500568106 |
| M263T27    | 0.500457309 | 0.953822657 | 0.500457309 |
| M461T343   | 0.500148411 | 0.95378949  | 0.500148411 |
| M367T370   | 0.500042636 | 0.95377729  | 0.500042636 |
| M372T304   | 0.499929518 | 0.953764918 | 0.499929518 |
| M401T247   | 0.499573645 | 0.953726177 | 0.499573645 |
| M500T212   | 0.499491931 | 0.953717068 | 0.499491931 |

|             |             |             |             |
|-------------|-------------|-------------|-------------|
| M754T52     | 0.499126937 | 0.953677175 | 0.499126937 |
| M321T162    | 0.498755845 | 0.953637284 | 0.498755845 |
| M373T335    | 0.498680968 | 0.953628477 | 0.498680968 |
| M1162T423_4 | 0.498552718 | 0.953614453 | 0.498552718 |
| M343T94     | 0.498243292 | 0.953580902 | 0.498243292 |
| M155T352    | 0.498086605 | 0.953563544 | 0.498086605 |
| M205T35     | 0.497345425 | 0.953482666 | 0.497345425 |
| M317T308    | 0.497282114 | 0.953476016 | 0.497282114 |
| M475T117    | 0.496913038 | 0.953435509 | 0.496913038 |
| M180T36     | 0.496800884 | 0.953423743 | 0.496800884 |
| M225T325    | 0.49675205  | 0.953417958 | 0.49675205  |
| M906T38     | 0.496441236 | 0.95338408  | 0.496441236 |
| M294T367    | 0.49633778  | 0.953372834 | 0.49633778  |
| M553T186    | 0.496239953 | 0.953362147 | 0.496239953 |
| M74T366     | 0.495977561 | 0.953333894 | 0.495977561 |
| M470T122    | 0.495551131 | 0.953287127 | 0.495551131 |
| M361T35     | 0.494957053 | 0.953222469 | 0.494957053 |
| M703T210    | 0.494934898 | 0.953220057 | 0.494934898 |
| M321T183    | 0.494369728 | 0.953158589 | 0.494369728 |
| M249T79     | 0.494285399 | 0.953149424 | 0.494285399 |
| M536T35     | 0.494271008 | 0.95314786  | 0.494271008 |
| M279T93     | 0.494258469 | 0.953146494 | 0.494258469 |
| M271T34     | 0.494117088 | 0.953131507 | 0.494117088 |
| M97T181     | 0.493998463 | 0.953118236 | 0.493998463 |
| M70T45      | 0.493870054 | 0.953104282 | 0.493870054 |
| M855T57     | 0.49349693  | 0.953063744 | 0.49349693  |
| M701T212    | 0.49311673  | 0.953022842 | 0.49311673  |
| M315T164    | 0.492731754 | 0.952981805 | 0.492731754 |
| M656T293    | 0.492670984 | 0.952974077 | 0.492670984 |
| M449T123    | 0.492658176 | 0.952972688 | 0.492658176 |
| M1006T177   | 0.492330006 | 0.952937086 | 0.492330006 |
| M332T351    | 0.492319966 | 0.952936    | 0.492319966 |
| M926T422_1  | 0.492054035 | 0.952907161 | 0.492054035 |
| M936T108    | 0.491810555 | 0.952881111 | 0.491810555 |
| M687T353    | 0.491732477 | 0.952872303 | 0.491732477 |
| M295T143    | 0.491601155 | 0.952858117 | 0.491601155 |
| M261T64     | 0.49154981  | 0.952852743 | 0.49154981  |
| M191T370    | 0.49148801  | 0.952845809 | 0.49148801  |
| M150T34     | 0.491469481 | 0.952843802 | 0.491469481 |
| M379T53     | 0.491361957 | 0.952832174 | 0.491361957 |
| M340T35     | 0.491254037 | 0.952820462 | 0.491254037 |
| M284T25     | 0.49111462  | 0.952805364 | 0.49111462  |
| M505T36_2   | 0.490777047 | 0.952768831 | 0.490777047 |

|           |             |             |             |
|-----------|-------------|-------------|-------------|
| M360T415  | 0.490734017 | 0.952764205 | 0.490734017 |
| M565T127  | 0.490372117 | 0.952724997 | 0.490372117 |
| M767T58   | 0.490351625 | 0.952722773 | 0.490351625 |
| M290T121  | 0.489964915 | 0.952680945 | 0.489964915 |
| M345T83   | 0.489928522 | 0.95267701  | 0.489928522 |
| M254T334  | 0.48981443  | 0.952664674 | 0.48981443  |
| M374T211  | 0.489724711 | 0.952654974 | 0.489724711 |
| M372T484  | 0.489672406 | 0.952649321 | 0.489672406 |
| M94T94    | 0.489592174 | 0.952640654 | 0.489592174 |
| M438T169  | 0.489194328 | 0.952597657 | 0.489194328 |
| M1062T59  | 0.48918749  | 0.952597049 | 0.48918749  |
| M531T202  | 0.489126734 | 0.952590359 | 0.489126734 |
| M160T397  | 0.488883238 | 0.952564059 | 0.488883238 |
| M521T155  | 0.48874643  | 0.952549632 | 0.48874643  |
| M872T39   | 0.488746133 | 0.952549257 | 0.488746133 |
| M655T212  | 0.488500552 | 0.952522745 | 0.488500552 |
| M192T366  | 0.488132837 | 0.952483071 | 0.488132837 |
| M341T49   | 0.488128154 | 0.952482962 | 0.488128154 |
| M435T34   | 0.488117305 | 0.952481402 | 0.488117305 |
| M757T91   | 0.487998218 | 0.952468555 | 0.487998218 |
| M829T106  | 0.48778636  | 0.952445671 | 0.48778636  |
| M462T39   | 0.487785317 | 0.952445598 | 0.487785317 |
| M204T258  | 0.487742737 | 0.952442195 | 0.487742737 |
| M209T177  | 0.487601304 | 0.952425757 | 0.487601304 |
| M431T33   | 0.487372252 | 0.952401069 | 0.487372252 |
| M735T36   | 0.487269258 | 0.952389973 | 0.487269258 |
| M491T273  | 0.487230207 | 0.952385881 | 0.487230207 |
| M264T346  | 0.487023515 | 0.952363498 | 0.487023515 |
| M159T150  | 0.486914961 | 0.952351808 | 0.486914961 |
| M281T27   | 0.486610498 | 0.95231903  | 0.486610498 |
| M206T185  | 0.486379836 | 0.952294206 | 0.486379836 |
| M403T33   | 0.485850999 | 0.95223732  | 0.485850999 |
| M518T154  | 0.485604919 | 0.952210869 | 0.485604919 |
| M239T191  | 0.485348873 | 0.952183352 | 0.485348873 |
| M96T272   | 0.485103291 | 0.952156978 | 0.485103291 |
| M841T38   | 0.485062722 | 0.952152616 | 0.485062722 |
| M359T234  | 0.484725144 | 0.952116391 | 0.484725144 |
| M879T174  | 0.484665257 | 0.952109945 | 0.484665257 |
| M364T404  | 0.483871472 | 0.952024795 | 0.483871472 |
| M1095T37  | 0.483793432 | 0.952016437 | 0.483793432 |
| M259T620  | 0.483743824 | 0.952011116 | 0.483743824 |
| M725T403  | 0.483601513 | 0.951995916 | 0.483601513 |
| M1034T174 | 0.483581449 | 0.951993714 | 0.483581449 |

|            |             |             |             |
|------------|-------------|-------------|-------------|
| M311T351   | 0.483410826 | 0.951975429 | 0.483410826 |
| M195T354   | 0.48302909  | 0.951934509 | 0.48302909  |
| M687T101   | 0.482873574 | 0.951917906 | 0.482873574 |
| M365T116   | 0.482630402 | 0.951891886 | 0.482630402 |
| M801T115   | 0.482625487 | 0.951891358 | 0.482625487 |
| M1067T187  | 0.482527668 | 0.951880896 | 0.482527668 |
| M481T169   | 0.4825169   | 0.951879742 | 0.4825169   |
| M591T161   | 0.482332745 | 0.951860045 | 0.482332745 |
| M264T167   | 0.482329718 | 0.95185975  | 0.482329718 |
| M869T52    | 0.482206429 | 0.951846538 | 0.482206429 |
| M408T380   | 0.4820947   | 0.951834594 | 0.4820947   |
| M115T73    | 0.48200653  | 0.951825187 | 0.48200653  |
| M295T18    | 0.481775935 | 0.951801083 | 0.481775935 |
| M1020T147  | 0.481424942 | 0.951763038 | 0.481424942 |
| M545T97    | 0.48120595  | 0.95178658  | 0.48120595  |
| M495T168   | 0.481131432 | 0.951731705 | 0.481131432 |
| M183T370   | 0.480498414 | 0.951664179 | 0.480498414 |
| M589T351   | 0.480419056 | 0.951655718 | 0.480419056 |
| M192T19    | 0.480201317 | 0.95163251  | 0.480201317 |
| M933T42    | 0.480155671 | 0.951627647 | 0.480155671 |
| M669T34    | 0.480143805 | 0.951626383 | 0.480143805 |
| M1097T34_1 | 0.480026791 | 0.951613915 | 0.480026791 |
| M912T351   | 0.479939828 | 0.951605426 | 0.479939828 |
| M528T105   | 0.479922119 | 0.951602773 | 0.479922119 |
| M353T130   | 0.47990708  | 0.951601166 | 0.47990708  |
| M705T264   | 0.479771991 | 0.951586778 | 0.479771991 |
| M849T52    | 0.479339653 | 0.95154076  | 0.479339653 |
| M927T422_2 | 0.479170437 | 0.951522757 | 0.479170437 |
| M487T121   | 0.479115891 | 0.951517315 | 0.479115891 |
| M559T32    | 0.479042985 | 0.951509202 | 0.479042985 |
| M787T131   | 0.478473856 | 0.951448706 | 0.478473856 |
| M256T80    | 0.478138586 | 0.951413097 | 0.478138586 |
| M1000T180  | 0.478122334 | 0.951411382 | 0.478122334 |
| M293T177   | 0.477777813 | 0.951374805 | 0.477777813 |
| M743T38    | 0.477053399 | 0.951297992 | 0.477053399 |
| M481T211   | 0.477048435 | 0.951297463 | 0.477048435 |
| M923T52    | 0.476974888 | 0.951289676 | 0.476974888 |
| M617T293   | 0.476889989 | 0.951280682 | 0.476889989 |
| M771T89_2  | 0.476652622 | 0.951255542 | 0.476652622 |
| M507T210   | 0.476527318 | 0.951242272 | 0.476527318 |
| M603T32    | 0.476249946 | 0.951213266 | 0.476249946 |
| M312T146   | 0.476242468 | 0.951212126 | 0.476242468 |
| M268T383   | 0.475542623 | 0.951138182 | 0.475542623 |

|            |             |             |             |
|------------|-------------|-------------|-------------|
| M300T479   | 0.475523977 | 0.951136159 | 0.475523977 |
| M1016T184  | 0.475369556 | 0.951119845 | 0.475369556 |
| M360T200_1 | 0.475101493 | 0.951091537 | 0.475101493 |
| M179T260   | 0.475088778 | 0.951090195 | 0.475088778 |
| M783T162   | 0.474728625 | 0.951052185 | 0.474728625 |
| M467T35_1  | 0.47468612  | 0.9510477   | 0.47468612  |
| M805T353   | 0.474631531 | 0.951041944 | 0.474631531 |
| M621T71    | 0.474400303 | 0.951017616 | 0.474400303 |
| M563T413   | 0.474395873 | 0.95101711  | 0.474395873 |
| M268T580   | 0.474231824 | 0.950999804 | 0.474231824 |
| M262T51    | 0.47414536  | 0.950990687 | 0.47414536  |
| M578T41    | 0.473818641 | 0.950956275 | 0.473818641 |
| M585T203   | 0.473732491 | 0.950947197 | 0.473732491 |
| M376T73    | 0.473546432 | 0.950927735 | 0.473546432 |
| M418T85    | 0.473254141 | 0.950896861 | 0.473254141 |
| M296T254   | 0.472978265 | 0.950867848 | 0.472978265 |
| M519T123   | 0.472973527 | 0.950867349 | 0.472973527 |
| M267T33    | 0.472715486 | 0.950840232 | 0.472715486 |
| M358T404   | 0.472601637 | 0.950828273 | 0.472601637 |
| M185T26    | 0.472574113 | 0.950825379 | 0.472574113 |
| M947T166   | 0.472497501 | 0.950817335 | 0.472497501 |
| M584T35    | 0.472443034 | 0.950811859 | 0.472443034 |
| M420T234   | 0.471856544 | 0.950750061 | 0.471856544 |
| M355T449   | 0.471833496 | 0.950747643 | 0.471833496 |
| M357T354   | 0.471554465 | 0.950718389 | 0.471554465 |
| M605T200   | 0.471442258 | 0.950706729 | 0.471442258 |
| M347T422   | 0.471319885 | 0.950693806 | 0.471319885 |
| M70T309    | 0.471096602 | 0.95067042  | 0.471096602 |
| M194T33    | 0.471028553 | 0.950663298 | 0.471028553 |
| M1157T422  | 0.470073963 | 0.950563459 | 0.470073963 |
| M193T181   | 0.469945593 | 0.950550046 | 0.469945593 |
| M297T36    | 0.469906155 | 0.950545929 | 0.469906155 |
| M398T56    | 0.469339388 | 0.950486865 | 0.469339388 |
| M293T540_2 | 0.469237551 | 0.950476147 | 0.469237551 |
| M484T262   | 0.468930203 | 0.950444106 | 0.468930203 |
| M787T53    | 0.468906448 | 0.950441929 | 0.468906448 |
| M245T394   | 0.468834046 | 0.950434129 | 0.468834046 |
| M529T114   | 0.467999332 | 0.950347202 | 0.467999332 |
| M366T384_1 | 0.467943188 | 0.950341366 | 0.467943188 |
| M139T78    | 0.467748585 | 0.950321142 | 0.467748585 |
| M198T66    | 0.467745227 | 0.950320786 | 0.467745227 |
| M298T319   | 0.467586953 | 0.950304342 | 0.467586953 |
| M309T292   | 0.467484281 | 0.950293675 | 0.467484281 |

|             |             |             |             |
|-------------|-------------|-------------|-------------|
| M484T82     | 0.467385286 | 0.950283393 | 0.467385286 |
| M324T424    | 0.467279329 | 0.950272461 | 0.467279329 |
| M203T258_1  | 0.466961318 | 0.950239402 | 0.466961318 |
| M187T280    | 0.466672293 | 0.950209415 | 0.466672293 |
| M517T204    | 0.46630861  | 0.950171732 | 0.46630861  |
| M429T33     | 0.466120025 | 0.950152267 | 0.466120025 |
| M140T181    | 0.466024615 | 0.950142321 | 0.466024615 |
| M118T247    | 0.465953365 | 0.95013495  | 0.465953365 |
| M372T395    | 0.465481055 | 0.950086102 | 0.465481055 |
| M302T190    | 0.465056637 | 0.950042248 | 0.465056637 |
| M272T108    | 0.46435032  | 0.949969381 | 0.46435032  |
| M657T27     | 0.463770042 | 0.949909608 | 0.463770042 |
| M347T403    | 0.46359936  | 0.949892046 | 0.46359936  |
| M399T243    | 0.463435707 | 0.949875524 | 0.463435707 |
| M189T85     | 0.463381493 | 0.949870473 | 0.463381493 |
| M890T53     | 0.463326436 | 0.949863981 | 0.463326436 |
| M612T450    | 0.462982547 | 0.949828585 | 0.462982547 |
| M1182T465_2 | 0.462971235 | 0.949827479 | 0.462971235 |
| M391T345    | 0.462842003 | 0.949814206 | 0.462842003 |
| M77T35      | 0.462559595 | 0.949785221 | 0.462559595 |
| M909T35     | 0.46215301  | 0.949743528 | 0.46215301  |
| M612T36     | 0.462013847 | 0.949729267 | 0.462013847 |
| M381T84     | 0.461642838 | 0.949729996 | 0.461642838 |
| M233T55     | 0.461558623 | 0.949682654 | 0.461558623 |
| M189T307    | 0.461531126 | 0.949679838 | 0.461531126 |
| M814T347    | 0.461373043 | 0.949663665 | 0.461373043 |
| M408T194    | 0.460921554 | 0.949617518 | 0.460921554 |
| M215T120    | 0.460839493 | 0.949609136 | 0.460839493 |
| M276T56     | 0.460747585 | 0.949600126 | 0.460747585 |
| M772T67     | 0.460114864 | 0.94953521  | 0.460114864 |
| M98T675     | 0.460068179 | 0.949530455 | 0.460068179 |
| M323T32     | 0.460033171 | 0.949526879 | 0.460033171 |
| M883T52     | 0.459998735 | 0.949523371 | 0.459998735 |
| M425T221    | 0.459968326 | 0.949520274 | 0.459968326 |
| M614T347    | 0.459932171 | 0.949516587 | 0.459932171 |
| M504T37     | 0.459603753 | 0.949483147 | 0.459603753 |
| M619T353    | 0.459344051 | 0.949456723 | 0.459344051 |
| M875T169_2  | 0.459280911 | 0.949450327 | 0.459280911 |
| M391T103    | 0.459028692 | 0.94942487  | 0.459028692 |
| M375T36     | 0.458714375 | 0.949392749 | 0.458714375 |
| M619T34     | 0.458633537 | 0.949384672 | 0.458633537 |
| M491T26     | 0.458262838 | 0.949346936 | 0.458262838 |
| M180T56     | 0.45826075  | 0.949346722 | 0.45826075  |

|             |             |             |             |
|-------------|-------------|-------------|-------------|
| M486T44     | 0.457969784 | 0.949317231 | 0.457969784 |
| M430T79     | 0.457806307 | 0.949300678 | 0.457806307 |
| M589T168_2  | 0.457781828 | 0.9492982   | 0.457781828 |
| M857T124_1  | 0.457153615 | 0.949234668 | 0.457153615 |
| M947T27     | 0.456547132 | 0.949173546 | 0.456547132 |
| M500T346    | 0.456537304 | 0.949172428 | 0.456537304 |
| M173T505    | 0.455959173 | 0.949114165 | 0.455959173 |
| M807T49     | 0.455678431 | 0.949085914 | 0.455678431 |
| M368T87_1   | 0.455650828 | 0.949083134 | 0.455650828 |
| M237T27     | 0.45553664  | 0.949071649 | 0.45553664  |
| M451T146    | 0.455494126 | 0.949067373 | 0.455494126 |
| M314T333    | 0.455088139 | 0.949026618 | 0.455088139 |
| M305T181    | 0.454998076 | 0.949017537 | 0.454998076 |
| M147T59     | 0.454920268 | 0.949009726 | 0.454920268 |
| M708T413    | 0.454801068 | 0.948997962 | 0.454801068 |
| M317T355    | 0.454690063 | 0.948986632 | 0.454690063 |
| M300T432    | 0.453969133 | 0.948914412 | 0.453969133 |
| M103T231    | 0.453802011 | 0.94889769  | 0.453802011 |
| M84T319     | 0.453781607 | 0.948895683 | 0.453781607 |
| M321T58     | 0.453745214 | 0.948892019 | 0.453745214 |
| M478T199    | 0.453709271 | 0.948888448 | 0.453709271 |
| M372T579    | 0.453402126 | 0.948857725 | 0.453402126 |
| M726T52     | 0.452998208 | 0.948817412 | 0.452998208 |
| M387T37     | 0.452944281 | 0.948812032 | 0.452944281 |
| M554T152    | 0.452170083 | 0.94873495  | 0.452170083 |
| M1158T422_4 | 0.452000313 | 0.94871817  | 0.452000313 |
| M786T63     | 0.451939769 | 0.948712026 | 0.451939769 |
| M122T369    | 0.451905244 | 0.948708588 | 0.451905244 |
| M1052T186   | 0.451829379 | 0.94870105  | 0.451829379 |
| M449T105    | 0.451565179 | 0.948674816 | 0.451565179 |
| M803T168    | 0.451429778 | 0.948661373 | 0.451429778 |
| M760T97     | 0.451393023 | 0.948657731 | 0.451393023 |
| M484T482    | 0.451337157 | 0.948652908 | 0.451337157 |
| M363T215    | 0.451323554 | 0.948650836 | 0.451323554 |
| M282T44     | 0.45132004  | 0.948650487 | 0.45132004  |
| M825T52     | 0.45131974  | 0.948650458 | 0.45131974  |
| M301T34     | 0.451309131 | 0.948649408 | 0.451309131 |
| M215T381    | 0.451258488 | 0.948644381 | 0.451258488 |
| M301T104    | 0.451196789 | 0.948638336 | 0.451196789 |
| M891T52     | 0.451074774 | 0.948626169 | 0.451074774 |
| M393T344    | 0.451037265 | 0.948622455 | 0.451037265 |
| M825T103    | 0.450772769 | 0.948596255 | 0.450772769 |
| M238T59     | 0.450655653 | 0.948584668 | 0.450655653 |

|            |             |             |             |
|------------|-------------|-------------|-------------|
| M273T19    | 0.450424875 | 0.948561839 | 0.450424875 |
| M571T34    | 0.450362693 | 0.948555687 | 0.450362693 |
| M827T68    | 0.450362337 | 0.948555656 | 0.450362337 |
| M855T352   | 0.450288418 | 0.948548346 | 0.450288418 |
| M263T581   | 0.450085417 | 0.948528293 | 0.450085417 |
| M824T68    | 0.449702401 | 0.948490492 | 0.449702401 |
| M769T107   | 0.449458763 | 0.948466615 | 0.449458763 |
| M1113T171  | 0.449105819 | 0.948431716 | 0.449105819 |
| M191T306   | 0.449104333 | 0.948431567 | 0.449104333 |
| M233T241   | 0.449081202 | 0.948429311 | 0.449081202 |
| M182T43    | 0.448932892 | 0.948414699 | 0.448932892 |
| M397T292   | 0.448793617 | 0.948401096 | 0.448793617 |
| M485T34    | 0.448586066 | 0.948380608 | 0.448586066 |
| M611T51    | 0.448556512 | 0.948377715 | 0.448556512 |
| M399T113   | 0.448401785 | 0.948362511 | 0.448401785 |
| M277T584   | 0.448267974 | 0.948349405 | 0.448267974 |
| M305T266   | 0.448194438 | 0.948342171 | 0.448194438 |
| M701T200   | 0.448044213 | 0.948327433 | 0.448044213 |
| M625T33    | 0.447816779 | 0.948305148 | 0.447816779 |
| M365T363   | 0.447693226 | 0.948293045 | 0.447693226 |
| M127T320_1 | 0.447520616 | 0.948276153 | 0.447520616 |
| M1026T48   | 0.447431689 | 0.948267451 | 0.447431689 |
| M399T53    | 0.446944125 | 0.948219807 | 0.446944125 |
| M170T55    | 0.446664068 | 0.948193061 | 0.446664068 |
| M939T352   | 0.44623591  | 0.948150749 | 0.44623591  |
| M129T48    | 0.446230563 | 0.948150265 | 0.446230563 |
| M393T162   | 0.445836289 | 0.948111875 | 0.445836289 |
| M645T200   | 0.445695749 | 0.948098212 | 0.445695749 |
| M873T39    | 0.445486251 | 0.948077866 | 0.445486251 |
| M681T210   | 0.445161061 | 0.948046311 | 0.445161061 |
| M409T26_1  | 0.444996069 | 0.948030323 | 0.444996069 |
| M363T218   | 0.444624814 | 0.947994368 | 0.444624814 |
| M887T127   | 0.444590817 | 0.947991079 | 0.444590817 |
| M159T178   | 0.444408277 | 0.94797344  | 0.444408277 |
| M161T59    | 0.444179211 | 0.947951293 | 0.444179211 |
| M198T26_3  | 0.444048826 | 0.9479387   | 0.444048826 |
| M527T49    | 0.444003603 | 0.947934342 | 0.444003603 |
| M1012T33   | 0.443800682 | 0.947914761 | 0.443800682 |
| M132T242_1 | 0.443603083 | 0.947895717 | 0.443603083 |
| M491T33_2  | 0.443537614 | 0.947889407 | 0.443537614 |
| M509T311   | 0.44343784  | 0.947879801 | 0.44343784  |
| M246T128   | 0.443296386 | 0.947866176 | 0.443296386 |
| M249T38    | 0.44329498  | 0.947866042 | 0.44329498  |

|             |             |             |             |
|-------------|-------------|-------------|-------------|
| M504T262    | 0.443208414 | 0.947857725 | 0.443208414 |
| M1153T422_2 | 0.443063143 | 0.947843773 | 0.443063143 |
| M196T56     | 0.442653176 | 0.947804358 | 0.442653176 |
| M308T214    | 0.442498361 | 0.947789501 | 0.442498361 |
| M202T234    | 0.442293829 | 0.947769895 | 0.442293829 |
| M437T58     | 0.442158159 | 0.947756905 | 0.442158159 |
| M246T403    | 0.442146932 | 0.947755818 | 0.442146932 |
| M147T180    | 0.442093226 | 0.947750675 | 0.442093226 |
| M261T338    | 0.441988099 | 0.947740913 | 0.441988099 |
| M191T34_1   | 0.441909936 | 0.947733132 | 0.441909936 |
| M681T256    | 0.441817406 | 0.947724282 | 0.441817406 |
| M374T107    | 0.441368386 | 0.947681377 | 0.441368386 |
| M225T47     | 0.44133014  | 0.947677727 | 0.44133014  |
| M1181T465_1 | 0.441120041 | 0.94765768  | 0.441120041 |
| M657T33     | 0.441073868 | 0.947653576 | 0.441073868 |
| M359T200    | 0.440797672 | 0.947626961 | 0.440797672 |
| M826T193    | 0.440708782 | 0.947618205 | 0.440708782 |
| M498T33     | 0.440349636 | 0.94758435  | 0.440349636 |
| M889T39     | 0.439876913 | 0.947539463 | 0.439876913 |
| M782T169_2  | 0.439665957 | 0.947519494 | 0.439665957 |
| M1037T186   | 0.439378861 | 0.947492279 | 0.439378861 |
| M372T272_2  | 0.439222421 | 0.947477487 | 0.439222421 |
| M452T255    | 0.439138017 | 0.947469502 | 0.439138017 |
| M187T401    | 0.43911568  | 0.947467386 | 0.43911568  |
| M993T353    | 0.43895703  | 0.947452398 | 0.43895703  |
| M799T109    | 0.43892856  | 0.947449712 | 0.43892856  |
| M462T348    | 0.438858315 | 0.947443089 | 0.438858315 |
| M369T36_2   | 0.438672411 | 0.947425532 | 0.438672411 |
| M703T103    | 0.438527166 | 0.947411842 | 0.438527166 |
| M196T143    | 0.438478975 | 0.947407297 | 0.438478975 |
| M357T483    | 0.438373799 | 0.947397389 | 0.438373799 |
| M973T34     | 0.438104102 | 0.947372073 | 0.438104102 |
| M357T512    | 0.438091798 | 0.947370843 | 0.438091798 |
| M125T244    | 0.437970499 | 0.947359445 | 0.437970499 |
| M443T123    | 0.437947379 | 0.947357359 | 0.437947379 |
| M396T40     | 0.437751396 | 0.947338847 | 0.437751396 |
| M191T258    | 0.437704482 | 0.947334437 | 0.437704482 |
| M337T292    | 0.437462466 | 0.947311781 | 0.437462466 |
| M774T349    | 0.43732463  | 0.947299932 | 0.43732463  |
| M369T98     | 0.43701724  | 0.947270011 | 0.43701724  |
| M131T305    | 0.436929939 | 0.94726184  | 0.436929939 |
| M249T227    | 0.436778201 | 0.947247648 | 0.436778201 |
| M1091T36    | 0.436600564 | 0.947231057 | 0.436600564 |

|             |             |             |             |
|-------------|-------------|-------------|-------------|
| M406T153    | 0.436374688 | 0.947209961 | 0.436374688 |
| M157T181    | 0.436244021 | 0.947199012 | 0.436244021 |
| M849T129    | 0.436193525 | 0.947193062 | 0.436193525 |
| M534T168_2  | 0.43501689  | 0.947083729 | 0.43501689  |
| M473T378    | 0.434966798 | 0.947079074 | 0.434966798 |
| M983T172    | 0.434856985 | 0.94706889  | 0.434856985 |
| M397T433    | 0.434537303 | 0.947039283 | 0.434537303 |
| M975T164    | 0.434432107 | 0.947029575 | 0.434432107 |
| M748T167    | 0.433721616 | 0.946964021 | 0.433721616 |
| M623T32     | 0.433649225 | 0.946957351 | 0.433649225 |
| M833T47     | 0.433594779 | 0.946952335 | 0.433594779 |
| M323T348    | 0.433565488 | 0.946949642 | 0.433565488 |
| M1082T51    | 0.433163685 | 0.946912709 | 0.433163685 |
| M793T242    | 0.433035668 | 0.946900958 | 0.433035668 |
| M262T285    | 0.432961247 | 0.94689413  | 0.432961247 |
| M359T152    | 0.432796571 | 0.946879243 | 0.432796571 |
| M201T446    | 0.432701895 | 0.94687092  | 0.432701895 |
| M680T33     | 0.432335113 | 0.946836815 | 0.432335113 |
| M159T107    | 0.432180479 | 0.946822665 | 0.432180479 |
| M707T202    | 0.431939168 | 0.946800671 | 0.431939168 |
| M797T111    | 0.431611405 | 0.946770764 | 0.431611405 |
| M865T80     | 0.431304268 | 0.946742815 | 0.431304268 |
| M104T437    | 0.430829928 | 0.946699743 | 0.430829928 |
| M183T105    | 0.430743056 | 0.946691869 | 0.430743056 |
| M715T214    | 0.430570163 | 0.946676211 | 0.430570163 |
| M465T36     | 0.43044129  | 0.946664567 | 0.43044129  |
| M328T168    | 0.430429293 | 0.946663488 | 0.430429293 |
| M150T59     | 0.430349146 | 0.946656216 | 0.430349146 |
| M382T114    | 0.42972668  | 0.946600016 | 0.42972668  |
| M239T382    | 0.429485406 | 0.94657828  | 0.429485406 |
| M249T27     | 0.429350828 | 0.94656619  | 0.429350828 |
| M309T336    | 0.429236262 | 0.946555874 | 0.429236262 |
| M923T228    | 0.428931749 | 0.946528572 | 0.428931749 |
| M1192T422_3 | 0.428829157 | 0.946519326 | 0.428829157 |
| M768T87     | 0.428696083 | 0.946507688 | 0.428696083 |
| M375T34     | 0.428682159 | 0.946506152 | 0.428682159 |
| M558T38     | 0.428680252 | 0.946505981 | 0.428680252 |
| M1162T423_2 | 0.428499284 | 0.946489839 | 0.428499284 |
| M97T320     | 0.428401019 | 0.946481068 | 0.428401019 |
| M451T32     | 0.428361739 | 0.94647747  | 0.428361739 |
| M117T205_1  | 0.428354964 | 0.946477074 | 0.428354964 |
| M960T115    | 0.428173642 | 0.946460696 | 0.428173642 |
| M150T167    | 0.428116254 | 0.946455535 | 0.428116254 |

|             |             |             |             |
|-------------|-------------|-------------|-------------|
| M453T121    | 0.428099702 | 0.94645413  | 0.428099702 |
| M423T99     | 0.427679097 | 0.94641655  | 0.427679097 |
| M328T26     | 0.427565332 | 0.946406424 | 0.427565332 |
| M175T207    | 0.427393558 | 0.946391182 | 0.427393558 |
| M782T79     | 0.427318923 | 0.946384506 | 0.427318923 |
| M168T385    | 0.427034088 | 0.946359222 | 0.427034088 |
| M1048T201   | 0.426955788 | 0.946352271 | 0.426955788 |
| M459T202    | 0.426745492 | 0.94633363  | 0.426745492 |
| M229T309    | 0.426469972 | 0.946309249 | 0.426469972 |
| M473T34     | 0.426310927 | 0.946295192 | 0.426310927 |
| M701T178    | 0.426184934 | 0.946284069 | 0.426184934 |
| M675T292    | 0.426154181 | 0.946281359 | 0.426154181 |
| M523T18     | 0.425791141 | 0.946249407 | 0.425791141 |
| M401T122    | 0.425581795 | 0.946230936 | 0.425581795 |
| M194T366    | 0.425463732 | 0.946220555 | 0.425463732 |
| M677T200    | 0.425444452 | 0.94621886  | 0.425444452 |
| M339T328    | 0.425243161 | 0.946201189 | 0.425243161 |
| M529T304    | 0.424913471 | 0.946172284 | 0.424913471 |
| M219T19     | 0.424773801 | 0.946160067 | 0.424773801 |
| M373T304_1  | 0.424679865 | 0.946151864 | 0.424679865 |
| M1158T422_2 | 0.424596858 | 0.94614459  | 0.424596858 |
| M329T143    | 0.424228076 | 0.946112396 | 0.424228076 |
| M277T396    | 0.424130301 | 0.946103878 | 0.424130301 |
| M132T168    | 0.424076915 | 0.946099225 | 0.424076915 |
| M681T294    | 0.424012657 | 0.94609363  | 0.424012657 |
| M189T37     | 0.423785285 | 0.946073846 | 0.423785285 |
| M597T33     | 0.423542225 | 0.946052764 | 0.423542225 |
| M980T168_2  | 0.42331815  | 0.946033297 | 0.42331815  |
| M188T272_1  | 0.422937551 | 0.946000355 | 0.422937551 |
| M305T290    | 0.422464018 | 0.945959489 | 0.422464018 |
| M831T156    | 0.422309494 | 0.945946192 | 0.422309494 |
| M827T106    | 0.422268803 | 0.945942667 | 0.422268803 |
| M890T72     | 0.421942646 | 0.945914622 | 0.421942646 |
| M958T24     | 0.421883368 | 0.945909537 | 0.421883368 |
| M774T51     | 0.421860328 | 0.945907562 | 0.421860328 |
| M1192T422_1 | 0.421303337 | 0.945859845 | 0.421303337 |
| M626T129    | 0.42117434  | 0.945848839 | 0.42117434  |
| M1063T37    | 0.421162352 | 0.945848308 | 0.421162352 |
| M121T35     | 0.420752245 | 0.945812816 | 0.420752245 |
| M964T352    | 0.42035838  | 0.945779311 | 0.42035838  |
| M503T102    | 0.420337485 | 0.945777548 | 0.420337485 |
| M587T57     | 0.419943481 | 0.945744133 | 0.419943481 |
| M257T38     | 0.4197934   | 0.945731431 | 0.4197934   |

|            |             |             |             |
|------------|-------------|-------------|-------------|
| M597T148   | 0.419558206 | 0.945711547 | 0.419558206 |
| M115T242   | 0.419554581 | 0.945711238 | 0.419554581 |
| M378T109   | 0.419386467 | 0.945697297 | 0.419386467 |
| M930T423_2 | 0.419244505 | 0.945685085 | 0.419244505 |
| M201T257   | 0.418951689 | 0.945660435 | 0.418951689 |
| M237T220   | 0.418625955 | 0.945633081 | 0.418625955 |
| M257T26    | 0.418612635 | 0.945631978 | 0.418612635 |
| M519T383   | 0.418561673 | 0.945627691 | 0.418561673 |
| M642T169   | 0.41850257  | 0.945622863 | 0.41850257  |
| M364T224   | 0.417813921 | 0.945565171 | 0.417813921 |
| M496T35    | 0.417774338 | 0.945561868 | 0.417774338 |
| M354T169   | 0.417577632 | 0.94554549  | 0.417577632 |
| M307T59    | 0.417142927 | 0.945509364 | 0.417142927 |
| M777T94_1  | 0.417069372 | 0.945503266 | 0.417069372 |
| M728T26_2  | 0.41704435  | 0.945501193 | 0.41704435  |
| M271T26    | 0.416580174 | 0.945462795 | 0.416580174 |
| M334T344   | 0.416550097 | 0.945461355 | 0.416550097 |
| M351T173   | 0.416528617 | 0.945458536 | 0.416528617 |
| M678T31    | 0.41644859  | 0.945451942 | 0.41644859  |
| M461T211   | 0.416395378 | 0.945447537 | 0.416395378 |
| M693T190   | 0.416393148 | 0.945447353 | 0.416393148 |
| M660T169   | 0.416378828 | 0.945446169 | 0.416378828 |
| M613T35    | 0.416295218 | 0.945439333 | 0.416295218 |
| M631T207   | 0.416147796 | 0.945427139 | 0.416147796 |
| M62T109    | 0.415894948 | 0.945406397 | 0.415894948 |
| M279T373   | 0.415732294 | 0.945393871 | 0.415732294 |
| M213T178   | 0.415557508 | 0.945433012 | 0.415557508 |
| M438T102   | 0.415541894 | 0.94537744  | 0.415541894 |
| M869T125   | 0.415483196 | 0.945372572 | 0.415483196 |
| M301T312   | 0.415231169 | 0.945352264 | 0.415231169 |
| M803T51    | 0.415057723 | 0.945337795 | 0.415057723 |
| M269T47    | 0.415046977 | 0.945336918 | 0.415046977 |
| M741T101   | 0.414901623 | 0.945325067 | 0.414901623 |
| M251T71    | 0.414489438 | 0.94529153  | 0.414489438 |
| M325T246   | 0.414440809 | 0.945287577 | 0.414440809 |
| M861T129   | 0.414350748 | 0.945280273 | 0.414350748 |
| M325T174   | 0.413677586 | 0.945225811 | 0.413677586 |
| M383T34    | 0.413431751 | 0.945205991 | 0.413431751 |
| M140T119   | 0.413381179 | 0.945201921 | 0.413381179 |
| M687T352   | 0.413214201 | 0.945188498 | 0.413214201 |
| M653T33_1  | 0.412277421 | 0.945113505 | 0.412277421 |
| M960T158   | 0.41211656  | 0.945100689 | 0.41211656  |
| M751T202   | 0.412104958 | 0.945099824 | 0.412104958 |

|            |             |             |             |
|------------|-------------|-------------|-------------|
| M589T32    | 0.411742838 | 0.945070985 | 0.411742838 |
| M335T33    | 0.411640568 | 0.945062946 | 0.411640568 |
| M785T131   | 0.411444647 | 0.945047359 | 0.411444647 |
| M899T129   | 0.411358264 | 0.945041432 | 0.411358264 |
| M673T34_1  | 0.4112797   | 0.945034312 | 0.4112797   |
| M195T84    | 0.411171826 | 0.945027404 | 0.411171826 |
| M603T83    | 0.411169027 | 0.945025569 | 0.411169027 |
| M376T338   | 0.411114846 | 0.945021487 | 0.411114846 |
| M788T51    | 0.411034804 | 0.945014975 | 0.411034804 |
| M325T378   | 0.41089529  | 0.94500398  | 0.41089529  |
| M274T304   | 0.410807785 | 0.944997099 | 0.410807785 |
| M1009T171  | 0.410672545 | 0.944986455 | 0.410672545 |
| M487T345   | 0.410599292 | 0.94498071  | 0.410599292 |
| M164T26    | 0.410166916 | 0.944946808 | 0.410166916 |
| M137T33    | 0.410161699 | 0.944946481 | 0.410161699 |
| M899T26    | 0.410118419 | 0.94494301  | 0.410118419 |
| M399T301   | 0.410089473 | 0.944940748 | 0.410089473 |
| M327T698   | 0.409960646 | 0.944930681 | 0.409960646 |
| M669T421   | 0.409855259 | 0.944922504 | 0.409855259 |
| M614T36    | 0.409799053 | 0.944918058 | 0.409799053 |
| M136T26_2  | 0.409674276 | 0.94490857  | 0.409674276 |
| M615T235   | 0.40941407  | 0.944888122 | 0.40941407  |
| M236T187   | 0.409307394 | 0.944879888 | 0.409307394 |
| M813T28    | 0.409200751 | 0.944871556 | 0.409200751 |
| M175T571   | 0.409158028 | 0.94486824  | 0.409158028 |
| M773T109   | 0.408802468 | 0.944840783 | 0.408802468 |
| M156T43    | 0.408416303 | 0.944810949 | 0.408416303 |
| M427T221   | 0.408297923 | 0.944801844 | 0.408297923 |
| M199T26_1  | 0.408198783 | 0.944794334 | 0.408198783 |
| M169T34    | 0.407987092 | 0.944779081 | 0.407987092 |
| M190T327   | 0.407746586 | 0.944759584 | 0.407746586 |
| M864T189   | 0.407585168 | 0.944747245 | 0.407585168 |
| M551T91    | 0.40758281  | 0.944747403 | 0.40758281  |
| M292T483_2 | 0.407548818 | 0.944744523 | 0.407548818 |
| M137T320   | 0.407139173 | 0.944713265 | 0.407139173 |
| M411T37    | 0.406744793 | 0.944683343 | 0.406744793 |
| M216T26_1  | 0.406424886 | 0.944659162 | 0.406424886 |
| M967T259   | 0.40637965  | 0.944655772 | 0.40637965  |
| M685T199   | 0.406363754 | 0.944654549 | 0.406363754 |
| M1044T51   | 0.406134649 | 0.944637446 | 0.406134649 |
| M189T33    | 0.405784514 | 0.944610997 | 0.405784514 |
| M815T53    | 0.405587044 | 0.944596239 | 0.405587044 |
| M281T101   | 0.405399258 | 0.944582178 | 0.405399258 |

|            |             |             |             |
|------------|-------------|-------------|-------------|
| M120T365   | 0.405278541 | 0.944573254 | 0.405278541 |
| M346T145   | 0.404822241 | 0.944539236 | 0.404822241 |
| M321T73    | 0.404583072 | 0.944521479 | 0.404583072 |
| M182T112   | 0.404489168 | 0.944514952 | 0.404489168 |
| M335T52    | 0.404464133 | 0.944512674 | 0.404464133 |
| M639T36    | 0.404338145 | 0.944503501 | 0.404338145 |
| M554T168   | 0.404285311 | 0.944500008 | 0.404285311 |
| M195T181_2 | 0.404276902 | 0.944498869 | 0.404276902 |
| M157T257   | 0.403800648 | 0.944463788 | 0.403800648 |
| M276T133   | 0.403762317 | 0.944460975 | 0.403762317 |
| M419T83    | 0.403748965 | 0.944459995 | 0.403748965 |
| M572T278   | 0.403736159 | 0.944459055 | 0.403736159 |
| M677T284   | 0.40372228  | 0.944458046 | 0.40372228  |
| M390T260   | 0.403513984 | 0.944442778 | 0.403513984 |
| M787T122   | 0.403036933 | 0.944407953 | 0.403036933 |
| M308T120   | 0.402834287 | 0.944393219 | 0.402834287 |
| M593T291   | 0.402627948 | 0.944378249 | 0.402627948 |
| M1010T79   | 0.402063259 | 0.944337894 | 0.402063259 |
| M112T424   | 0.402052419 | 0.944336677 | 0.402052419 |
| M534T36_1  | 0.401630653 | 0.944306382 | 0.401630653 |
| M145T258   | 0.401622295 | 0.944305783 | 0.401622295 |
| M828T107   | 0.401611583 | 0.944305017 | 0.401611583 |
| M757T81    | 0.401536198 | 0.94430048  | 0.401536198 |
| M409T352   | 0.40148338  | 0.944295835 | 0.40148338  |
| M895T173   | 0.401466246 | 0.944294614 | 0.401466246 |
| M405T26    | 0.400979047 | 0.944259876 | 0.400979047 |
| M241T96    | 0.400772745 | 0.944245221 | 0.400772745 |
| M519T138   | 0.400513113 | 0.944227012 | 0.400513113 |
| M716T34    | 0.399929229 | 0.944185698 | 0.399929229 |
| M497T107   | 0.399918726 | 0.944184999 | 0.399918726 |
| M783T27    | 0.399228897 | 0.944136724 | 0.399228897 |
| M449T135   | 0.3989622   | 0.944118192 | 0.3989622   |
| M935T32    | 0.398726059 | 0.944101826 | 0.398726059 |
| M265T676   | 0.398703151 | 0.944100244 | 0.398703151 |
| M307T338   | 0.398573555 | 0.944091306 | 0.398573555 |
| M393T258   | 0.398435645 | 0.944081775 | 0.398435645 |
| M142T53    | 0.398252044 | 0.944069145 | 0.398252044 |
| M661T294   | 0.398054072 | 0.944055538 | 0.398054072 |
| M205T300   | 0.3980399   | 0.944054568 | 0.3980399   |
| M289T467   | 0.398000577 | 0.944052458 | 0.398000577 |
| M127T27    | 0.39761935  | 0.944025807 | 0.39761935  |
| M118T370   | 0.39745451  | 0.944014613 | 0.39745451  |
| M981T159   | 0.397341963 | 0.944007005 | 0.397341963 |

|            |             |             |             |
|------------|-------------|-------------|-------------|
| M160T262   | 0.397039438 | 0.943986403 | 0.397039438 |
| M75T105    | 0.396993516 | 0.943983327 | 0.396993516 |
| M527T110   | 0.396983175 | 0.943982595 | 0.396983175 |
| M1066T57   | 0.396802348 | 0.943970378 | 0.396802348 |
| M99T255    | 0.396425474 | 0.943945063 | 0.396425474 |
| M663T306   | 0.396314    | 0.943937536 | 0.396314    |
| M446T414   | 0.396158862 | 0.943927146 | 0.396158862 |
| M261T18    | 0.396001409 | 0.943916623 | 0.396001409 |
| M880T55    | 0.395961725 | 0.943913981 | 0.395961725 |
| M685T34_1  | 0.395927575 | 0.943911699 | 0.395927575 |
| M265T220   | 0.39588644  | 0.943908956 | 0.39588644  |
| M251T409   | 0.395541367 | 0.943886013 | 0.395541367 |
| M757T349   | 0.395376886 | 0.943875116 | 0.395376886 |
| M367T217_2 | 0.395206603 | 0.943863865 | 0.395206603 |
| M1031T127  | 0.394865596 | 0.943841407 | 0.394865596 |
| M700T33    | 0.394746825 | 0.943833608 | 0.394746825 |
| M365T238   | 0.394604261 | 0.943824266 | 0.394604261 |
| M258T64    | 0.394126554 | 0.943793101 | 0.394126554 |
| M408T26    | 0.394054072 | 0.943788432 | 0.394054072 |
| M339T282   | 0.393873294 | 0.943776669 | 0.393873294 |
| M343T59    | 0.393536011 | 0.943754874 | 0.393536011 |
| M979T185   | 0.393424089 | 0.943747664 | 0.393424089 |
| M701T248   | 0.393357512 | 0.943743393 | 0.393357512 |
| M355T203   | 0.392550158 | 0.94369207  | 0.392550158 |
| M363T376   | 0.392293658 | 0.943675539 | 0.392293658 |
| M974T42    | 0.392151403 | 0.943666818 | 0.392151403 |
| M261T101   | 0.39212663  | 0.943665068 | 0.39212663  |
| M449T32    | 0.391975609 | 0.943655473 | 0.391975609 |
| M201T278   | 0.391733483 | 0.943640274 | 0.391733483 |
| M115T72    | 0.391658641 | 0.943691625 | 0.391658641 |
| M855T38    | 0.391617071 | 0.943632969 | 0.391617071 |
| M659T169_1 | 0.391539697 | 0.943628124 | 0.391539697 |
| M704T57    | 0.390993399 | 0.943594115 | 0.390993399 |
| M524T34    | 0.390893126 | 0.943587905 | 0.390893126 |
| M739T208   | 0.390873147 | 0.943586669 | 0.390873147 |
| M528T313   | 0.390780291 | 0.943637952 | 0.390780291 |
| M917T292_2 | 0.390777772 | 0.943580773 | 0.390777772 |
| M700T60    | 0.390753461 | 0.943580289 | 0.390753461 |
| M456T83    | 0.39069993  | 0.943576005 | 0.39069993  |
| M490T115   | 0.390344879 | 0.94355416  | 0.390344879 |
| M101T109   | 0.390308132 | 0.943551876 | 0.390308132 |
| M578T348   | 0.390258303 | 0.94354882  | 0.390258303 |
| M638T272   | 0.39025667  | 0.943548882 | 0.39025667  |

|            |             |             |             |
|------------|-------------|-------------|-------------|
| M331T381   | 0.390243831 | 0.943547948 | 0.390243831 |
| M455T54    | 0.3900418   | 0.943535591 | 0.3900418   |
| M723T352   | 0.389688775 | 0.943514244 | 0.389688775 |
| M595T36    | 0.389629549 | 0.943510512 | 0.389629549 |
| M734T202   | 0.389392941 | 0.943497073 | 0.389392941 |
| M364T383   | 0.389373595 | 0.943495032 | 0.389373595 |
| M365T409   | 0.389341257 | 0.943493086 | 0.389341257 |
| M337T242   | 0.389135648 | 0.943480857 | 0.389135648 |
| M252T375   | 0.389036646 | 0.943474753 | 0.389036646 |
| M607T418_2 | 0.389010807 | 0.943473215 | 0.389010807 |
| M1078T33   | 0.388830316 | 0.943462417 | 0.388830316 |
| M322T346   | 0.38875177  | 0.943457702 | 0.38875177  |
| M715T352   | 0.388496529 | 0.943442496 | 0.388496529 |
| M317T35_2  | 0.388342904 | 0.943433375 | 0.388342904 |
| M127T320_2 | 0.38828172  | 0.943430838 | 0.38828172  |
| M185T67    | 0.388222051 | 0.943426216 | 0.388222051 |
| M120T332   | 0.388034946 | 0.943415251 | 0.388034946 |
| M655T194   | 0.387881202 | 0.943406112 | 0.387881202 |
| M1198T352  | 0.387763193 | 0.943399231 | 0.387763193 |
| M610T463   | 0.387763034 | 0.943399169 | 0.387763034 |
| M289T106   | 0.387599236 | 0.943390115 | 0.387599236 |
| M324T118   | 0.387355803 | 0.943375355 | 0.387355803 |
| M394T115   | 0.387262652 | 0.943369941 | 0.387262652 |
| M946T465_1 | 0.387237033 | 0.943369152 | 0.387237033 |
| M360T102   | 0.387234666 | 0.943368312 | 0.387234666 |
| M989T33    | 0.387017247 | 0.943356402 | 0.387017247 |
| M672T57    | 0.386677395 | 0.943336081 | 0.386677395 |
| M162T46    | 0.386653988 | 0.943334733 | 0.386653988 |
| M663T120   | 0.386559315 | 0.943329307 | 0.386559315 |
| M369T141   | 0.386415625 | 0.943321052 | 0.386415625 |
| M311T194   | 0.38630822  | 0.943314929 | 0.38630822  |
| M933T117   | 0.386187721 | 0.94330803  | 0.386187721 |
| M307T214   | 0.385988338 | 0.943296686 | 0.385988338 |
| M210T35    | 0.38591769  | 0.943292796 | 0.38591769  |
| M1051T168  | 0.385848755 | 0.943288839 | 0.385848755 |
| M107T94    | 0.385833564 | 0.94328795  | 0.385833564 |
| M453T122   | 0.385766192 | 0.943284093 | 0.385766192 |
| M241T66    | 0.385684797 | 0.943279493 | 0.385684797 |
| M239T173   | 0.385076313 | 0.943245337 | 0.385076313 |
| M1100T352  | 0.385029388 | 0.943242718 | 0.385029388 |
| M420T111   | 0.385021606 | 0.943242284 | 0.385021606 |
| M588T168   | 0.384846163 | 0.943232583 | 0.384846163 |
| M774T171   | 0.384802118 | 0.943230153 | 0.384802118 |

|            |             |             |             |
|------------|-------------|-------------|-------------|
| M972T58    | 0.384199819 | 0.943196847 | 0.384199819 |
| M268T35    | 0.383937516 | 0.943182596 | 0.383937516 |
| M415T272   | 0.383920389 | 0.94318178  | 0.383920389 |
| M262T497   | 0.383865441 | 0.94317857  | 0.383865441 |
| M691T126   | 0.383713414 | 0.943171471 | 0.383713414 |
| M362T85    | 0.383554149 | 0.943161699 | 0.383554149 |
| M294T255   | 0.383474296 | 0.943157353 | 0.383474296 |
| M1006T178  | 0.383473217 | 0.943157294 | 0.383473217 |
| M391T55    | 0.383139199 | 0.943139312 | 0.383139199 |
| M305T38    | 0.382819277 | 0.943122746 | 0.382819277 |
| M221T300   | 0.382768626 | 0.943119526 | 0.382768626 |
| M449T35    | 0.382630908 | 0.943112192 | 0.382630908 |
| M200T257   | 0.382627916 | 0.943112032 | 0.382627916 |
| M302T310   | 0.382474143 | 0.943103891 | 0.382474143 |
| M479T342   | 0.382184195 | 0.9430886   | 0.382184195 |
| M247T26_1  | 0.381609625 | 0.943058596 | 0.381609625 |
| M135T34_2  | 0.38156384  | 0.943056221 | 0.38156384  |
| M300T49    | 0.381402    | 0.943048895 | 0.381402    |
| M486T94    | 0.381123804 | 0.943033522 | 0.381123804 |
| M554T479_2 | 0.380998142 | 0.943027145 | 0.380998142 |
| M277T54    | 0.380951783 | 0.943024718 | 0.380951783 |
| M285T155   | 0.380878705 | 0.943020976 | 0.380878705 |
| M746T39    | 0.380718151 | 0.943012797 | 0.380718151 |
| M165T373   | 0.380689601 | 0.943011347 | 0.380689601 |
| M1142T181  | 0.380527602 | 0.943004349 | 0.380527602 |
| M719T54    | 0.380427521 | 0.942998069 | 0.380427521 |
| M680T242   | 0.380312477 | 0.942992268 | 0.380312477 |
| M1007T32   | 0.380237892 | 0.942988511 | 0.380237892 |
| M253T141_2 | 0.38013203  | 0.942983215 | 0.38013203  |
| M244T301   | 0.380017647 | 0.942977486 | 0.380017647 |
| M395T584   | 0.379834676 | 0.942968335 | 0.379834676 |
| M459T122   | 0.379811621 | 0.942967205 | 0.379811621 |
| M339T194   | 0.379725961 | 0.94296293  | 0.379725961 |
| M171T422   | 0.379657675 | 0.94295954  | 0.379657675 |
| M608T418   | 0.379618398 | 0.942957684 | 0.379618398 |
| M499T416   | 0.379583968 | 0.942955891 | 0.379583968 |
| M329T125   | 0.379538051 | 0.942953618 | 0.379538051 |
| M118T205   | 0.379520468 | 0.94295275  | 0.379520468 |
| M418T122   | 0.379355527 | 0.942944635 | 0.379355527 |
| M218T335   | 0.379314083 | 0.942942575 | 0.379314083 |
| M392T105   | 0.37863472  | 0.942909446 | 0.37863472  |
| M109T157   | 0.378547365 | 0.942905234 | 0.378547365 |
| M605T451   | 0.378221373 | 0.942889567 | 0.378221373 |

|           |             |             |             |
|-----------|-------------|-------------|-------------|
| M775T156  | 0.378067934 | 0.942882242 | 0.378067934 |
| M588T38   | 0.378060301 | 0.942881888 | 0.378060301 |
| M171T88   | 0.377552974 | 0.942857882 | 0.377552974 |
| M301T23   | 0.377524342 | 0.942856523 | 0.377524342 |
| M1189T291 | 0.377504998 | 0.942855612 | 0.377504998 |
| M573T91   | 0.377434539 | 0.942852308 | 0.377434539 |
| M651T95   | 0.377197991 | 0.942841293 | 0.377197991 |
| M731T135  | 0.376925833 | 0.942829769 | 0.376925833 |
| M294T43   | 0.376873113 | 0.942826205 | 0.376873113 |

Table S7. Divergent metabolites between Wb-T and Cb-C.

| Metabolism  | Qst         |             |               |
|-------------|-------------|-------------|---------------|
|             | 0.05%       | 99.50%      | Estimated Qst |
| M319T152    | 0.925642051 | 0.996932855 | 0.9562893     |
| M821T39     | 0.910700465 | 0.996157335 | 0.94524905    |
| M164T32     | 0.90859961  | 0.996042522 | 0.943614047   |
| M427T300    | 0.904957113 | 0.99583972  | 0.940725147   |
| M536T225    | 0.898485317 | 0.995467208 | 0.93541618    |
| M339T31     | 0.896952612 | 0.995376562 | 0.934123632   |
| M268T580    | 0.896337978 | 0.995339955 | 0.933601622   |
| M241T210    | 0.895289016 | 0.995277117 | 0.932705464   |
| M339T27     | 0.893371974 | 0.995161054 | 0.931049774   |
| M397T223    | 0.893324154 | 0.995158143 | 0.931008257   |
| M494T169    | 0.892625409 | 0.995115398 | 0.930398196   |
| M97T320     | 0.890292855 | 0.9949713   | 0.928341807   |
| M534T227    | 0.888816423 | 0.994878801 | 0.927021229   |
| M77T35      | 0.886209957 | 0.994713023 | 0.924653536   |
| M478T175    | 0.883640692 | 0.994546402 | 0.922272506   |
| M398T88     | 0.883160331 | 0.994514882 | 0.921821927   |
| M395T222    | 0.882768493 | 0.994489091 | 0.921453216   |
| M1176T261_2 | 0.882603549 | 0.994478211 | 0.921297678   |
| M130T173    | 0.88137293  | 0.994396575 | 0.920130284   |
| M312T28_2   | 0.881317601 | 0.994392886 | 0.920077523   |
| M422T304    | 0.879477486 | 0.994269287 | 0.918309364   |
| M298T499    | 0.878919307 | 0.99423142  | 0.917767407   |
| M336T301    | 0.87880411  | 0.994223603 | 0.91765562    |
| M311T28     | 0.878631516 | 0.994211854 | 0.917487465   |
| M826T193    | 0.878433142 | 0.994198265 | 0.917292676   |
| M454T204    | 0.876366599 | 0.994056137 | 0.91525806    |
| M310T431    | 0.876155226 | 0.994041502 | 0.915048639   |
| M743T81     | 0.876041489 | 0.994033549 | 0.914934543   |

|             |             |             |             |
|-------------|-------------|-------------|-------------|
| M706T38     | 0.875660232 | 0.994006968 | 0.914553735 |
| M672T404    | 0.875445884 | 0.993992008 | 0.914339489 |
| M438T429    | 0.875128509 | 0.993969786 | 0.914021128 |
| M196T272_2  | 0.873318751 | 0.993841954 | 0.912189142 |
| M407T32     | 0.872132153 | 0.99375705  | 0.910971675 |
| M297T28     | 0.868334981 | 0.993479477 | 0.906988153 |
| M185T37     | 0.867733595 | 0.99343465  | 0.906344276 |
| M667T485    | 0.867133185 | 0.993389656 | 0.905697853 |
| M677T31     | 0.866862151 | 0.993369261 | 0.90540476  |
| M451T428    | 0.866659166 | 0.993353945 | 0.905184617 |
| M768T138    | 0.865092308 | 0.993234848 | 0.903472439 |
| M125T99     | 0.864979125 | 0.993226154 | 0.903347303 |
| M395T584    | 0.864416523 | 0.993182941 | 0.902725815 |
| M355T203    | 0.863221538 | 0.993090347 | 0.901393401 |
| M364T404    | 0.862710868 | 0.993050444 | 0.900818924 |
| M391T330    | 0.862395174 | 0.993025699 | 0.90046269  |
| M207T32_1   | 0.86189177  | 0.992986065 | 0.899891902 |
| M511T351    | 0.860009643 | 0.992836149 | 0.897731561 |
| M321T291    | 0.85974471  | 0.99281482  | 0.897424018 |
| M473T236    | 0.85967883  | 0.992809511 | 0.89734747  |
| M255T208    | 0.858780055 | 0.992736654 | 0.896296474 |
| M906T228    | 0.85839967  | 0.992705498 | 0.895846352 |
| M417T180    | 0.858324939 | 0.992699435 | 0.895759049 |
| M831T540    | 0.857542677 | 0.99263526  | 0.8948329   |
| M281T28_1   | 0.857396149 | 0.99262327  | 0.894660185 |
| M1168T354_2 | 0.856897584 | 0.992582015 | 0.894064439 |
| M1002T32    | 0.856790869 | 0.992573141 | 0.893936199 |
| M359T278    | 0.85677497  | 0.992571837 | 0.893917439 |
| M549T82     | 0.85569148  | 0.992481324 | 0.892609646 |
| M417T28     | 0.855364669 | 0.992453824 | 0.892212156 |
| M185T386    | 0.854923254 | 0.992416502 | 0.891672443 |
| M150T239    | 0.853991524 | 0.99233722  | 0.890525753 |
| M274T453    | 0.853011977 | 0.992252974 | 0.889306356 |
| M619T108    | 0.852993689 | 0.992251399 | 0.88928359  |
| M737T70     | 0.852980417 | 0.992250251 | 0.889266969 |
| M420T264    | 0.852425003 | 0.992202069 | 0.888569209 |
| M284T44     | 0.852386026 | 0.992198679 | 0.888520113 |
| M322T131    | 0.851407286 | 0.992112992 | 0.887278447 |
| M431T123    | 0.851112387 | 0.992086991 | 0.886901499 |
| M970T80     | 0.850866268 | 0.992065254 | 0.886586425 |
| M514T221    | 0.850625163 | 0.992043878 | 0.886276429 |
| M487T345    | 0.85003763  | 0.991991538 | 0.885517162 |

|            |             |             |             |
|------------|-------------|-------------|-------------|
| M399T259   | 0.849851066 | 0.991974828 | 0.885274617 |
| M612T36    | 0.849307911 | 0.991926039 | 0.884566529 |
| M85T32     | 0.849249    | 0.99192071  | 0.884489079 |
| M761T81    | 0.849063358 | 0.991903966 | 0.884246048 |
| M118T272_2 | 0.848996377 | 0.991897909 | 0.884158093 |
| M296T79    | 0.848502813 | 0.991853087 | 0.88350691  |
| M313T41    | 0.848446687 | 0.991847969 | 0.883432521 |
| M944T228   | 0.848077043 | 0.991814296 | 0.882943466 |
| M351T358   | 0.847976489 | 0.991805095 | 0.882809748 |
| M588T155   | 0.847927205 | 0.99180058  | 0.882744139 |
| M234T444   | 0.847805188 | 0.991789395 | 0.882581564 |
| M465T263   | 0.847175427 | 0.991731402 | 0.881738394 |
| M1012T353  | 0.846898232 | 0.991705736 | 0.881365084 |
| M237T206   | 0.846813565 | 0.991697882 | 0.881250834 |
| M263T263   | 0.846744427 | 0.991691461 | 0.881157416 |
| M220T32    | 0.846552256 | 0.991673584 | 0.880897309 |
| M801T596   | 0.846323776 | 0.991652275 | 0.880587219 |
| M371T272   | 0.845638826 | 0.99158804  | 0.879652086 |
| M265T79    | 0.845440292 | 0.991569318 | 0.87937942  |
| M495T207   | 0.845272518 | 0.991553461 | 0.87914845  |
| M373T260   | 0.845251346 | 0.991551458 | 0.879119278 |
| M395T260   | 0.845037123 | 0.991531156 | 0.878823476 |
| M254T272   | 0.844836858 | 0.99151213  | 0.878546245 |
| M358T436   | 0.844781806 | 0.991506891 | 0.878469881 |
| M570T298   | 0.844366178 | 0.991467225 | 0.877891699 |
| M439T429   | 0.844167802 | 0.991447938 | 0.877609366 |
| M396T581   | 0.844011566 | 0.991433217 | 0.87739579  |
| M83T33     | 0.843687242 | 0.991401805 | 0.876936918 |
| M435T352   | 0.843635887 | 0.991397014 | 0.87686768  |
| M696T212   | 0.843059338 | 0.991341125 | 0.876052066 |
| M535T165   | 0.842693021 | 0.991305395 | 0.875530395 |
| M115T72    | 0.842429708 | 0.991279603 | 0.875153677 |
| M549T269   | 0.842418298 | 0.991278488 | 0.8751374   |
| M951T228   | 0.842095036 | 0.991246687 | 0.874672758 |
| M848T260   | 0.841822648 | 0.991219759 | 0.874279082 |
| M680T499   | 0.841790145 | 0.991216597 | 0.874233064 |
| M437T428   | 0.841644143 | 0.991202136 | 0.874021676 |
| M214T385   | 0.841556853 | 0.991193477 | 0.873895082 |
| M807T156   | 0.841311382 | 0.991169024 | 0.873537328 |
| M347T422   | 0.841159067 | 0.991153893 | 0.873316231 |
| M376T166   | 0.84099312  | 0.991137316 | 0.873073758 |
| M187T335   | 0.840772538 | 0.991115222 | 0.872750492 |

|            |             |             |             |
|------------|-------------|-------------|-------------|
| M705T181   | 0.840603321 | 0.991098231 | 0.87250186  |
| M295T353   | 0.839987558 | 0.991036054 | 0.871591556 |
| M344T212   | 0.83981584  | 0.991018634 | 0.871336448 |
| M314T454_2 | 0.839451157 | 0.990981477 | 0.870792056 |
| M126T224   | 0.83930031  | 0.990966046 | 0.870565891 |
| M534T366   | 0.839258801 | 0.990961429 | 0.870496826 |
| M286T390   | 0.839235487 | 0.990959414 | 0.870468711 |
| M570T313   | 0.83911585  | 0.990947145 | 0.870288859 |
| M462T429   | 0.839064269 | 0.990941758 | 0.870209535 |
| M375T28    | 0.838904734 | 0.990925449 | 0.869970784 |
| M138T402   | 0.838853898 | 0.990920214 | 0.869894011 |
| M555T321   | 0.838371635 | 0.990870367 | 0.869162853 |
| M285T155   | 0.838255516 | 0.990858313 | 0.86898598  |
| M855T429   | 0.838059885 | 0.99083796  | 0.868687278 |
| M1192T45   | 0.837920958 | 0.990823471 | 0.868474588 |
| M179T260   | 0.837831227 | 0.9908141   | 0.868337029 |
| M310T311   | 0.837767181 | 0.990807404 | 0.868238706 |
| M1057T354  | 0.837404679 | 0.990769376 | 0.86768022  |
| M478T428   | 0.837377969 | 0.990766569 | 0.867638988 |
| M470T122   | 0.837293573 | 0.990757629 | 0.86750745  |
| M197T260   | 0.836991985 | 0.990725824 | 0.867040241 |
| M698T271   | 0.836978584 | 0.990724411 | 0.867019481 |
| M971T34    | 0.836784255 | 0.990703793 | 0.866716332 |
| M315T454   | 0.836678537 | 0.990692585 | 0.866551653 |
| M1050T352  | 0.836587813 | 0.990682944 | 0.866409918 |
| M439T33    | 0.83658398  | 0.990682381 | 0.866401069 |
| M1142T37   | 0.83653458  | 0.990677277 | 0.866326592 |
| M903T353   | 0.836393763 | 0.990662257 | 0.866105699 |
| M298T273   | 0.836214141 | 0.990643053 | 0.865823203 |
| M918T32    | 0.836210659 | 0.990642505 | 0.865814473 |
| M220T151   | 0.836194197 | 0.990640918 | 0.865791785 |
| M989T33    | 0.836134676 | 0.990634514 | 0.865697464 |
| M228T168   | 0.836076075 | 0.990628256 | 0.865605476 |
| M678T31    | 0.835911963 | 0.990610607 | 0.865345679 |
| M257T140   | 0.835774246 | 0.990595807 | 0.865127923 |
| M314T454_1 | 0.835762879 | 0.990594576 | 0.865109776 |
| M168T385   | 0.835090556 | 0.990521744 | 0.864037201 |
| M307T155   | 0.83477294  | 0.99048691  | 0.863523253 |
| M305T115   | 0.834747818 | 0.990484307 | 0.863485446 |
| M395T366   | 0.834437447 | 0.99045026  | 0.862983516 |
| M667T353   | 0.834354242 | 0.990441096 | 0.862848334 |
| M654T260   | 0.834288981 | 0.990433908 | 0.862742344 |

|            |             |             |             |
|------------|-------------|-------------|-------------|
| M283T44    | 0.833409989 | 0.990336298 | 0.86130167  |
| M549T595   | 0.833392834 | 0.990333924 | 0.861264927 |
| M1084T352  | 0.833310893 | 0.99032521  | 0.861137906 |
| M407T190   | 0.83306447  | 0.990297554 | 0.860729327 |
| M173T299   | 0.83283759  | 0.990271991 | 0.860351536 |
| M356T432   | 0.832723215 | 0.990259057 | 0.860160282 |
| M611T353   | 0.832707455 | 0.990257306 | 0.860134517 |
| M298T304   | 0.832315648 | 0.990212828 | 0.859476685 |
| M373T220   | 0.83230229  | 0.990211256 | 0.859453238 |
| M275T304   | 0.832065166 | 0.990184251 | 0.859053856 |
| M802T265   | 0.832025516 | 0.990179707 | 0.858986574 |
| M144T352   | 0.83197914  | 0.990173869 | 0.858898244 |
| M263T581   | 0.831976087 | 0.99017406  | 0.858903043 |
| M687T352   | 0.831892282 | 0.990164457 | 0.858760903 |
| M415T428   | 0.831678181 | 0.990139293 | 0.858386269 |
| M147T216   | 0.831657173 | 0.990137447 | 0.858361006 |
| M571T81    | 0.83152717  | 0.990122441 | 0.85813867  |
| M183T279   | 0.831409161 | 0.990108836 | 0.857937239 |
| M745T82    | 0.831387927 | 0.990105974 | 0.857893356 |
| M245T217   | 0.831360783 | 0.990103241 | 0.857854338 |
| M831T428   | 0.831288789 | 0.990094311 | 0.857719873 |
| M851T189   | 0.831100682 | 0.990073082 | 0.857407446 |
| M1085T37   | 0.830525276 | 0.99000588  | 0.85641094  |
| M158T258   | 0.83051108  | 0.990004213 | 0.856386208 |
| M1198T352  | 0.830486522 | 0.990001331 | 0.856343453 |
| M572T278   | 0.830026601 | 0.989947084 | 0.855538287 |
| M497T428   | 0.829842939 | 0.989923256 | 0.8551771   |
| M463T179   | 0.829792139 | 0.989918993 | 0.855120128 |
| M275T439   | 0.829468094 | 0.989880623 | 0.854550999 |
| M1023T172  | 0.829278187 | 0.989857872 | 0.854212819 |
| M113T276   | 0.82913678  | 0.989840882 | 0.853960196 |
| M629T28    | 0.82894265  | 0.989817481 | 0.853612138 |
| M459T202   | 0.828870282 | 0.989808736 | 0.853482036 |
| M845T352   | 0.82867261  | 0.989784794 | 0.853125761 |
| M454T201   | 0.828630046 | 0.98977799  | 0.8530187   |
| M675T214_2 | 0.828191809 | 0.989726181 | 0.852253004 |
| M735T214   | 0.828077027 | 0.989712111 | 0.85204339  |
| M209T333   | 0.827823688 | 0.989680951 | 0.851579007 |
| M547T428   | 0.827405067 | 0.989629119 | 0.850806019 |
| M269T104   | 0.827292273 | 0.989615092 | 0.850596757 |
| M759T39_1  | 0.827141025 | 0.989596146 | 0.850313724 |
| M200T158   | 0.827047246 | 0.989584498 | 0.850140119 |

|             |             |             |             |
|-------------|-------------|-------------|-------------|
| M182T43     | 0.826851764 | 0.989559958 | 0.849773585 |
| M420T211    | 0.826781508 | 0.989551111 | 0.849641395 |
| M190T35     | 0.826743194 | 0.989546329 | 0.849570106 |
| M255T429    | 0.82664434  | 0.989533861 | 0.849383799 |
| M1139T354_2 | 0.82663498  | 0.989532674 | 0.849366052 |
| M271T34     | 0.826528192 | 0.989519199 | 0.849164732 |
| M78T207     | 0.826455693 | 0.989510027 | 0.84902766  |
| M113T158    | 0.826405697 | 0.989503697 | 0.848933051 |
| M980T32     | 0.826332017 | 0.989494346 | 0.848793244 |
| M1071T354   | 0.826219959 | 0.989480104 | 0.848580279 |
| M534T354    | 0.826080692 | 0.989461828 | 0.848305095 |
| M781T39     | 0.82594534  | 0.989445061 | 0.848056074 |
| M1126T36    | 0.825816178 | 0.989428524 | 0.847808627 |
| M475T428    | 0.825522012 | 0.989390677 | 0.847242024 |
| M652T235    | 0.825457181 | 0.989382306 | 0.847116647 |
| M355T260    | 0.825395606 | 0.989374344 | 0.846997383 |
| M507T290    | 0.825336412 | 0.989366679 | 0.846882555 |
| M430T272_1  | 0.825197529 | 0.989348664 | 0.846612609 |
| M103T256    | 0.82515396  | 0.989343001 | 0.846527749 |
| M586T272    | 0.825105204 | 0.989336657 | 0.846432653 |
| M290T440    | 0.824941166 | 0.989315269 | 0.846112003 |
| M143T351    | 0.82492043  | 0.989312542 | 0.846071053 |
| M235T272    | 0.824862822 | 0.989305026 | 0.845958399 |
| M118T302    | 0.82481011  | 0.989298126 | 0.845854906 |
| M196T272_1  | 0.824566532 | 0.989266142 | 0.845375053 |
| M484T262    | 0.824452597 | 0.989251119 | 0.845149557 |
| M291T366    | 0.824359551 | 0.98923883  | 0.844965081 |
| M514T130    | 0.824304243 | 0.989231512 | 0.844855204 |
| M269T39     | 0.824146198 | 0.989210553 | 0.844540423 |
| M946T465_1  | 0.824116979 | 0.989206668 | 0.84448207  |
| M698T210    | 0.82409571  | 0.98920384  | 0.844439575 |
| M676T465_3  | 0.824063373 | 0.98919954  | 0.84437498  |
| M1138T354_2 | 0.824056984 | 0.989198687 | 0.844362169 |
| M131T341    | 0.8239351   | 0.989182441 | 0.844118048 |
| M1059T354_2 | 0.823850889 | 0.989171194 | 0.843949007 |
| M221T278    | 0.823467012 | 0.989119644 | 0.843173755 |
| M1108T339_4 | 0.823450302 | 0.98911734  | 0.84313892  |
| M152T260_1  | 0.823415884 | 0.989112746 | 0.843069975 |
| M474T375    | 0.82331745  | 0.989099435 | 0.84286964  |
| M352T272    | 0.823294705 | 0.989096365 | 0.84282345  |
| M295T176    | 0.823280546 | 0.989094447 | 0.842794578 |
| M255T352    | 0.822944769 | 0.989048806 | 0.842107333 |

|             |             |             |             |
|-------------|-------------|-------------|-------------|
| M199T260    | 0.822843984 | 0.989034358 | 0.841887383 |
| M972T34     | 0.822768467 | 0.989024704 | 0.841744175 |
| M283T539    | 0.822722555 | 0.989018405 | 0.841649235 |
| M166T256    | 0.822410922 | 0.988975521 | 0.841002646 |
| M757T39     | 0.822300961 | 0.988960312 | 0.840773192 |
| M469T272    | 0.822279398 | 0.988957321 | 0.840728056 |
| M289T431    | 0.822240081 | 0.988951873 | 0.840645862 |
| M739T352    | 0.822091425 | 0.98893122  | 0.840334132 |
| M571T193    | 0.822061236 | 0.988927017 | 0.840270674 |
| M163T55     | 0.82189724  | 0.988904053 | 0.839923636 |
| M1007T32    | 0.821648118 | 0.988870544 | 0.839422058 |
| M801T266    | 0.821615813 | 0.988864655 | 0.839328629 |
| M210T35     | 0.821570883 | 0.988858326 | 0.839232964 |
| M496T174    | 0.821549091 | 0.988855254 | 0.839186519 |
| M524T192    | 0.821536121 | 0.988853425 | 0.839158874 |
| M1112T36    | 0.821480778 | 0.988845614 | 0.839040787 |
| M183T85     | 0.821265009 | 0.988815038 | 0.838578252 |
| M1016T168   | 0.821101321 | 0.988790149 | 0.838196382 |
| M751T352    | 0.821057652 | 0.988785516 | 0.838131453 |
| M618T204    | 0.82098187  | 0.988774727 | 0.837968237 |
| M728T195    | 0.820980442 | 0.988774524 | 0.837965165 |
| M342T37     | 0.820908384 | 0.988764212 | 0.83780901  |
| M1118T354_2 | 0.820886668 | 0.988760903 | 0.837758251 |
| M401T211    | 0.820811715 | 0.988750352 | 0.837599103 |
| M911T354    | 0.820704494 | 0.988734864 | 0.837364221 |
| M369T221    | 0.820702718 | 0.988734677 | 0.837361615 |
| M854T352    | 0.820564567 | 0.988714759 | 0.837059763 |
| M294T244    | 0.82055233  | 0.988712995 | 0.837033025 |
| M142T242    | 0.820414441 | 0.988693034 | 0.8367304   |
| M251T169    | 0.820412727 | 0.988692785 | 0.836726616 |
| M262T427    | 0.820281983 | 0.988673794 | 0.836438589 |
| M120T256    | 0.820274374 | 0.988672683 | 0.836421707 |
| M1061T352   | 0.820271703 | 0.988672286 | 0.836415669 |
| M974T34     | 0.820201452 | 0.988662065 | 0.836260642 |
| M118T272_1  | 0.819886234 | 0.988615906 | 0.835559889 |
| M661T36     | 0.819865376 | 0.988612852 | 0.83551354  |
| M293T321    | 0.819864167 | 0.988612675 | 0.83551085  |
| M830T479    | 0.819767466 | 0.988598413 | 0.835294139 |
| M174T335    | 0.819753743 | 0.988596382 | 0.835263261 |
| M823T214    | 0.819726993 | 0.988592462 | 0.83520379  |
| M372T503    | 0.819595629 | 0.988573037 | 0.834908584 |
| M669T198    | 0.819494366 | 0.988558019 | 0.834680267 |

|             |             |             |             |
|-------------|-------------|-------------|-------------|
| M804T100    | 0.819434295 | 0.988549089 | 0.834544482 |
| M945T465_2  | 0.819418627 | 0.988559444 | 0.834742346 |
| M515T213    | 0.819405049 | 0.988544738 | 0.834478307 |
| M848T352    | 0.81931052  | 0.988530644 | 0.834263911 |
| M224T671    | 0.819300223 | 0.988529107 | 0.834240542 |
| M563T213    | 0.819288055 | 0.988527264 | 0.834212402 |
| M282T129    | 0.819207991 | 0.988515323 | 0.834030811 |
| M293T540_2  | 0.819183125 | 0.98851107  | 0.833964405 |
| M282T260    | 0.819075342 | 0.98849512  | 0.833722304 |
| M1104T37    | 0.819023862 | 0.988487696 | 0.833610266 |
| M434T429    | 0.818737296 | 0.988444376 | 0.832950223 |
| M111T159    | 0.818694797 | 0.988437953 | 0.832852401 |
| M291T335_1  | 0.818667667 | 0.988433851 | 0.83278993  |
| M140T381    | 0.818586243 | 0.988421381 | 0.832599545 |
| M275T399    | 0.818583695 | 0.988421084 | 0.832595301 |
| M1067T36    | 0.818463347 | 0.988402729 | 0.832315388 |
| M1188T172   | 0.818290148 | 0.988376201 | 0.831910618 |
| M452T201    | 0.818188675 | 0.988360605 | 0.831672576 |
| M550T153    | 0.81813069  | 0.988351661 | 0.831535989 |
| M1099T37    | 0.818065901 | 0.988341671 | 0.831383473 |
| M143T153    | 0.818004638 | 0.988332197 | 0.831238755 |
| M248T427    | 0.81792667  | 0.988320116 | 0.831054181 |
| M605T203    | 0.817910251 | 0.988317569 | 0.831015271 |
| M325T209    | 0.81789941  | 0.988315299 | 0.830978765 |
| M949T464    | 0.817781657 | 0.988297561 | 0.830709436 |
| M263T366    | 0.817769256 | 0.988295608 | 0.83067951  |
| M928T209    | 0.81765425  | 0.988277687 | 0.830405586 |
| M170T157    | 0.817578443 | 0.988265799 | 0.830223686 |
| M1090T354_2 | 0.817373829 | 0.988233661 | 0.829731959 |
| M369T203    | 0.81727819  | 0.988217943 | 0.829489399 |
| M888T352    | 0.817133735 | 0.988195672 | 0.829150189 |
| M1176T261_1 | 0.817123465 | 0.98819404  | 0.829125177 |
| M392T185    | 0.816978458 | 0.988169682 | 0.828747977 |
| M630T436    | 0.816894215 | 0.98815719  | 0.828559421 |
| M536T100    | 0.816829599 | 0.988147148 | 0.82840637  |
| M141T334    | 0.816775315 | 0.988138438 | 0.828272765 |
| M176T272    | 0.816724945 | 0.988130347 | 0.828148643 |
| M831T250    | 0.816706714 | 0.98812739  | 0.828103184 |
| M981T159    | 0.816622681 | 0.988113876 | 0.827895871 |
| M973T34     | 0.816592805 | 0.988109061 | 0.827821995 |
| M744T81     | 0.816551584 | 0.988102395 | 0.827719653 |
| M830T196    | 0.816367055 | 0.988072477 | 0.827260177 |

|             |             |             |             |
|-------------|-------------|-------------|-------------|
| M309T255    | 0.816243647 | 0.988052369 | 0.826951205 |
| M192T385    | 0.816214893 | 0.988047641 | 0.826878439 |
| M417T429    | 0.815908607 | 0.987997376 | 0.826105451 |
| M471T34_2   | 0.815886048 | 0.987993648 | 0.826048063 |
| M731T354    | 0.815840836 | 0.987986164 | 0.825932835 |
| M396T366    | 0.815819097 | 0.987982582 | 0.825877749 |
| M551T314    | 0.815798744 | 0.987979177 | 0.825825214 |
| M242T238    | 0.815724096 | 0.987966829 | 0.825635186 |
| M554T196    | 0.81568413  | 0.987960079 | 0.825530892 |
| M206T157    | 0.81562998  | 0.987951186 | 0.825394265 |
| M115T242    | 0.81544637  | 0.987920608 | 0.824923326 |
| M589T345    | 0.815421054 | 0.987916265 | 0.824856076 |
| M258T452    | 0.815416046 | 0.987915426 | 0.824843137 |
| M123T299    | 0.814908725 | 0.987829399 | 0.823514867 |
| M945T465_1  | 0.814802921 | 0.987811494 | 0.823238732 |
| M567T260    | 0.814795047 | 0.987810137 | 0.823217738 |
| M193T354    | 0.814727007 | 0.987798475 | 0.823037494 |
| M243T159    | 0.814564585 | 0.987770471 | 0.822604302 |
| M832T333    | 0.814366217 | 0.987735815 | 0.822067143 |
| M742T149    | 0.814275931 | 0.987720058 | 0.821823052 |
| M837T211    | 0.814101002 | 0.98768969  | 0.821353238 |
| M291T303_1  | 0.814073221 | 0.987684843 | 0.821278213 |
| M964T352    | 0.814058551 | 0.987701556 | 0.82159303  |
| M291T256    | 0.813930686 | 0.987659709 | 0.820888423 |
| M1105T37    | 0.813909222 | 0.987655837 | 0.820828126 |
| M100T705    | 0.813823103 | 0.987640638 | 0.820592453 |
| M475T181    | 0.813632245 | 0.987606642 | 0.820064623 |
| M173T423    | 0.813589864 | 0.987599058 | 0.819946791 |
| M1122T354   | 0.813563749 | 0.987594378 | 0.819874074 |
| M386T155    | 0.813479703 | 0.987579285 | 0.819639514 |
| M662T200    | 0.813372326 | 0.987559929 | 0.819338536 |
| M261T123    | 0.813341949 | 0.987554438 | 0.819253131 |
| M786T147    | 0.813341143 | 0.987554277 | 0.819250594 |
| M1138T352_2 | 0.813277531 | 0.98754262  | 0.81906884  |
| M680T200    | 0.813180569 | 0.987525158 | 0.818797504 |
| M831T479_1  | 0.813057682 | 0.987502707 | 0.818447843 |
| M677T201    | 0.812990687 | 0.987490465 | 0.818257216 |
| M843T272    | 0.812812334 | 0.987457647 | 0.8177457   |
| M375T279    | 0.812753028 | 0.987446686 | 0.817574776 |
| M312T134    | 0.812648247 | 0.987427007 | 0.81726708  |
| M284T260    | 0.812507069 | 0.987400919 | 0.816860491 |
| M466T169_2  | 0.812473113 | 0.987394562 | 0.816761192 |

|             |             |             |             |
|-------------|-------------|-------------|-------------|
| M150T294    | 0.812465969 | 0.987393225 | 0.816740329 |
| M696T283    | 0.8124524   | 0.987390678 | 0.816700521 |
| M67T32      | 0.812401753 | 0.987381177 | 0.816552106 |
| M305T272    | 0.812361592 | 0.987373623 | 0.816434045 |
| M401T231    | 0.812354347 | 0.987372263 | 0.816412817 |
| M542T152    | 0.812339103 | 0.987368194 | 0.816345896 |
| M1107T339_3 | 0.812318577 | 0.987365526 | 0.816307526 |
| M945T464    | 0.8121083   | 0.987325698 | 0.815684601 |
| M285T381    | 0.812088661 | 0.98732196  | 0.815626116 |
| M110T260    | 0.812047918 | 0.987314196 | 0.815504591 |
| M342T333    | 0.812014754 | 0.987307864 | 0.815405458 |
| M1160T352   | 0.81190865  | 0.987287546 | 0.815087292 |
| M374T211    | 0.811867713 | 0.987279687 | 0.814964184 |
| M863T429    | 0.811819605 | 0.987270427 | 0.814819072 |
| M221T33     | 0.811786381 | 0.987264019 | 0.814718638 |
| M395T263    | 0.811785617 | 0.987263873 | 0.814716346 |
| M703T272    | 0.811764666 | 0.987259826 | 0.814652904 |
| M496T196    | 0.811695496 | 0.98724631  | 0.814440622 |
| M927T199    | 0.811477209 | 0.987203945 | 0.813776239 |
| M256T80     | 0.811475414 | 0.987203581 | 0.8137705   |
| M1159T352_1 | 0.811449136 | 0.987198413 | 0.813689297 |
| M491T272    | 0.811404643 | 0.987189713 | 0.813552722 |
| M220T26     | 0.811333839 | 0.987175801 | 0.813334203 |
| M446T171    | 0.811237451 | 0.98715677  | 0.813035097 |
| M851T78     | 0.811139409 | 0.987137327 | 0.812729359 |
| M840T272_1  | 0.810922104 | 0.987093905 | 0.812045923 |
| M203T381    | 0.810811541 | 0.987071635 | 0.811695085 |
| M333T421    | 0.810802119 | 0.987069733 | 0.811665123 |
| M1044T352   | 0.81067428  | 0.987043825 | 0.811256663 |
| M849T352    | 0.810620402 | 0.987032835 | 0.811083259 |
| M1070T354_1 | 0.810594516 | 0.987027378 | 0.810996688 |
| M393T270    | 0.810557496 | 0.987020008 | 0.810880896 |
| M262T157    | 0.810420843 | 0.986991965 | 0.810438136 |
| M687T353    | 0.810391951 | 0.987004905 | 0.810691868 |
| M427T221    | 0.810302205 | 0.98698336  | 0.810302205 |
| M457T204    | 0.810065204 | 0.986968363 | 0.810065204 |
| M1115T37    | 0.809806359 | 0.98695199  | 0.809806359 |
| M1001T352   | 0.809798776 | 0.986951511 | 0.809798776 |
| M357T175    | 0.809756795 | 0.986948857 | 0.809756795 |
| M205T35     | 0.809667881 | 0.986943235 | 0.809667881 |
| M757T351    | 0.809651689 | 0.986942232 | 0.809651689 |
| M987T352    | 0.809519407 | 0.986933848 | 0.809519407 |

|            |             |             |             |
|------------|-------------|-------------|-------------|
| M816T32    | 0.808832508 | 0.986890464 | 0.808832508 |
| M193T311   | 0.808794098 | 0.986888041 | 0.808794098 |
| M739T78    | 0.808745977 | 0.986885065 | 0.808745977 |
| M291T352   | 0.808672861 | 0.986880388 | 0.808672861 |
| M461T429   | 0.808547655 | 0.986872489 | 0.808547655 |
| M263T27    | 0.808488393 | 0.986868751 | 0.808488393 |
| M473T228_2 | 0.808044562 | 0.986840767 | 0.808044562 |
| M461T211   | 0.80668563  | 0.98675523  | 0.80668563  |
| M372T272_1 | 0.806606443 | 0.986750258 | 0.806606443 |
| M182T299   | 0.806260936 | 0.986728545 | 0.806260936 |
| M496T33    | 0.806233246 | 0.986722839 | 0.806233246 |
| M539T153   | 0.805821247 | 0.98670094  | 0.805821247 |
| M871T429   | 0.805568411 | 0.986685082 | 0.805568411 |
| M620T209   | 0.805567362 | 0.986685011 | 0.805567362 |
| M279T262   | 0.805412571 | 0.986675338 | 0.805412571 |
| M955T32    | 0.805408762 | 0.986675078 | 0.805408762 |
| M299T41    | 0.805300088 | 0.986668251 | 0.805300088 |
| M147T299   | 0.804969159 | 0.986647536 | 0.804969159 |
| M732T35    | 0.804933823 | 0.986645299 | 0.804933823 |
| M357T423   | 0.804706149 | 0.98663104  | 0.804706149 |
| M158T179   | 0.804437002 | 0.986614252 | 0.804437002 |
| M601T170   | 0.804045217 | 0.986589682 | 0.804045217 |
| M487T169   | 0.803495539 | 0.986555328 | 0.803495539 |
| M386T393   | 0.803403611 | 0.986549587 | 0.803403611 |
| M444T170   | 0.803394717 | 0.986549031 | 0.803394717 |
| M455T429   | 0.803092246 | 0.986530295 | 0.803092246 |
| M371T345   | 0.802938922 | 0.98652058  | 0.802938922 |
| M503T171   | 0.802751112 | 0.986508864 | 0.802751112 |
| M759T118   | 0.80259177  | 0.986498928 | 0.80259177  |
| M780T114   | 0.802371652 | 0.986485208 | 0.802371652 |
| M278T256   | 0.802060141 | 0.9864658   | 0.802060141 |
| M769T169   | 0.801948739 | 0.986458865 | 0.801948739 |
| M1192T153  | 0.801701308 | 0.986443461 | 0.801701308 |
| M771T47    | 0.801655052 | 0.986440589 | 0.801655052 |
| M910T354   | 0.801466405 | 0.986428845 | 0.801466405 |
| M489T272_1 | 0.801314656 | 0.986419408 | 0.801314656 |
| M551T267   | 0.801033551 | 0.986401933 | 0.801033551 |
| M772T216   | 0.80089871  | 0.986393559 | 0.80089871  |
| M1055T354  | 0.800673083 | 0.986379581 | 0.800673083 |
| M171T87    | 0.800578049 | 0.986373638 | 0.800578049 |
| M650T32    | 0.800507281 | 0.986369293 | 0.800507281 |
| M445T325   | 0.800487379 | 0.98636801  | 0.800487379 |

|             |             |             |             |
|-------------|-------------|-------------|-------------|
| M1192T171   | 0.80025743  | 0.986353741 | 0.80025743  |
| M412T41     | 0.799929665 | 0.986333411 | 0.799929665 |
| M295T334    | 0.799929074 | 0.986333418 | 0.799929074 |
| M663T354    | 0.799869995 | 0.986329711 | 0.799869995 |
| M387T204    | 0.799749878 | 0.986322266 | 0.799749878 |
| M149T257    | 0.799717575 | 0.986320264 | 0.799717575 |
| M365T116    | 0.79968038  | 0.986317958 | 0.79968038  |
| M757T160    | 0.799361838 | 0.986298226 | 0.799361838 |
| M545T18     | 0.799334014 | 0.986296503 | 0.799334014 |
| M390T260    | 0.799249318 | 0.986291259 | 0.799249318 |
| M413T358    | 0.799078851 | 0.98628071  | 0.799078851 |
| M263T428    | 0.799073267 | 0.986280426 | 0.799073267 |
| M694T213    | 0.798979305 | 0.986274685 | 0.798979305 |
| M483T154    | 0.798937774 | 0.986271978 | 0.798937774 |
| M548T272    | 0.798533705 | 0.986246989 | 0.798533705 |
| M109T238    | 0.798505205 | 0.986245227 | 0.798505205 |
| M459T260    | 0.798479749 | 0.98624366  | 0.798479749 |
| M180T56     | 0.798454488 | 0.986242099 | 0.798454488 |
| M183T90     | 0.798160259 | 0.986223914 | 0.798160259 |
| M207T199    | 0.797772799 | 0.986199993 | 0.797772799 |
| M293T328    | 0.797591161 | 0.986188787 | 0.797591161 |
| M239T187    | 0.797382454 | 0.986175914 | 0.797382454 |
| M993T79     | 0.797367885 | 0.986175016 | 0.797367885 |
| M342T58     | 0.79707213  | 0.986156786 | 0.79707213  |
| M803T169    | 0.796803402 | 0.986140235 | 0.796803402 |
| M472T228    | 0.796535502 | 0.986123787 | 0.796535502 |
| M1107T339_1 | 0.79633221  | 0.986111234 | 0.79633221  |
| M423T32_2   | 0.796294321 | 0.986108902 | 0.796294321 |
| M271T212    | 0.796159903 | 0.986100636 | 0.796159903 |
| M933T57     | 0.796146714 | 0.986099825 | 0.796146714 |
| M1095T37    | 0.795966617 | 0.986088752 | 0.795966617 |
| M281T300    | 0.795935493 | 0.986086843 | 0.795935493 |
| M723T207    | 0.795878855 | 0.986083358 | 0.795878855 |
| M243T284    | 0.79577921  | 0.986077236 | 0.79577921  |
| M613T206    | 0.795549437 | 0.986063123 | 0.795549437 |
| M194T366    | 0.795146676 | 0.986038402 | 0.795146676 |
| M199T180    | 0.794991078 | 0.986028857 | 0.794991078 |
| M992T353    | 0.794959764 | 0.986026943 | 0.794959764 |
| M1036T172   | 0.794833255 | 0.98601918  | 0.794833255 |
| M588T202    | 0.794590378 | 0.986004314 | 0.794590378 |
| M303T158    | 0.794338042 | 0.985988838 | 0.794338042 |
| M188T272_1  | 0.794295623 | 0.985986249 | 0.794295623 |

|            |             |             |             |
|------------|-------------|-------------|-------------|
| M279T159   | 0.794260928 | 0.985984116 | 0.794260928 |
| M445T373   | 0.794106382 | 0.985974695 | 0.794106382 |
| M554T479_1 | 0.794008932 | 0.985968691 | 0.794008932 |
| M551T305   | 0.793486564 | 0.98593675  | 0.793486564 |
| M668T271   | 0.793374647 | 0.985929909 | 0.793374647 |
| M217T577   | 0.793037721 | 0.985909339 | 0.793037721 |
| M850T429   | 0.793033874 | 0.985909095 | 0.793033874 |
| M191T585   | 0.792848793 | 0.985898275 | 0.792848793 |
| M374T272   | 0.792515899 | 0.98587749  | 0.792515899 |
| M191T34_1  | 0.792240654 | 0.985860713 | 0.792240654 |
| M520T169_2 | 0.792167053 | 0.985856229 | 0.792167053 |
| M827T68    | 0.792083645 | 0.985851154 | 0.792083645 |
| M565T260   | 0.791822165 | 0.985835232 | 0.791822165 |
| M795T54    | 0.791621163 | 0.985822989 | 0.791621163 |
| M314T33    | 0.791514445 | 0.985816561 | 0.791514445 |
| M801T330   | 0.791307718 | 0.985803924 | 0.791307718 |
| M104T437   | 0.791158006 | 0.985794826 | 0.791158006 |
| M273T197   | 0.791118809 | 0.985792443 | 0.791118809 |
| M277T303_1 | 0.791095884 | 0.985791047 | 0.791095884 |
| M157T352_2 | 0.790875628 | 0.985777668 | 0.790875628 |
| M255T442   | 0.790791656 | 0.985772566 | 0.790791656 |
| M611T171   | 0.790721655 | 0.985768515 | 0.790721655 |
| M410T209   | 0.790576204 | 0.985759486 | 0.790576204 |
| M557T428   | 0.790230601 | 0.985738794 | 0.790230601 |
| M823T102   | 0.789941073 | 0.985720966 | 0.789941073 |
| M313T28_1  | 0.789902863 | 0.985718652 | 0.789902863 |
| M753T175   | 0.789781561 | 0.985711436 | 0.789781561 |
| M169T35_2  | 0.789482792 | 0.985693214 | 0.789482792 |
| M664T272_1 | 0.789270305 | 0.98568035  | 0.789270305 |
| M117T242   | 0.789229629 | 0.985677889 | 0.789229629 |
| M888T112   | 0.789181626 | 0.98567498  | 0.789181626 |
| M485T373   | 0.789032911 | 0.985665994 | 0.789032911 |
| M273T262   | 0.789005257 | 0.985664324 | 0.789005257 |
| M252T27_2  | 0.788885848 | 0.985657101 | 0.788885848 |
| M86T262    | 0.788729379 | 0.985647645 | 0.788729379 |
| M1004T170  | 0.788664511 | 0.985643726 | 0.788664511 |
| M313T378   | 0.788640854 | 0.985642297 | 0.788640854 |
| M739T81    | 0.78860097  | 0.98563989  | 0.78860097  |
| M366T260   | 0.788551436 | 0.985636896 | 0.788551436 |
| M865T175   | 0.788356441 | 0.985625123 | 0.788356441 |
| M409T352   | 0.788253452 | 0.985618906 | 0.788253452 |
| M1094T35   | 0.788159889 | 0.985613261 | 0.788159889 |

|             |             |             |             |
|-------------|-------------|-------------|-------------|
| M741T38     | 0.787981524 | 0.985602502 | 0.787981524 |
| M338T354    | 0.787902868 | 0.985597759 | 0.787902868 |
| M471T36     | 0.787859791 | 0.985595162 | 0.787859791 |
| M481T329    | 0.787776882 | 0.985590163 | 0.787776882 |
| M1188T354_2 | 0.787747585 | 0.985588397 | 0.787747585 |
| M554T479_2  | 0.787019201 | 0.985544538 | 0.787019201 |
| M946T352    | 0.787013813 | 0.985544212 | 0.787013813 |
| M849T158    | 0.786958062 | 0.98554086  | 0.786958062 |
| M785T352_1  | 0.786743842 | 0.985527982 | 0.786743842 |
| M112T237    | 0.786675248 | 0.985524236 | 0.786675248 |
| M197T298    | 0.786649151 | 0.985522283 | 0.786649151 |
| M1024T353   | 0.786387098 | 0.98550658  | 0.786387098 |
| M136T299    | 0.786360716 | 0.985504954 | 0.786360716 |
| M1018T33    | 0.786257651 | 0.985498769 | 0.786257651 |
| M1138T354_1 | 0.785858358 | 0.985474802 | 0.785858358 |
| M291T541    | 0.785844252 | 0.98547403  | 0.785844252 |
| M152T260_2  | 0.785614673 | 0.985460191 | 0.785614673 |
| M268T262    | 0.785566336 | 0.985457293 | 0.785566336 |
| M276T263_2  | 0.785547843 | 0.985456188 | 0.785547843 |
| M566T248    | 0.78541615  | 0.985448303 | 0.78541615  |
| M884T352    | 0.785206003 | 0.985435712 | 0.785206003 |
| M195T298    | 0.784985632 | 0.985422513 | 0.784985632 |
| M335T253    | 0.784829855 | 0.985413193 | 0.784829855 |
| M608T171    | 0.784825341 | 0.985412924 | 0.784825341 |
| M508T242    | 0.784789643 | 0.985410787 | 0.784789643 |
| M136T158    | 0.784763684 | 0.985409235 | 0.784763684 |
| M269T47     | 0.784709417 | 0.985405994 | 0.784709417 |
| M213T104_1  | 0.784670403 | 0.985403656 | 0.784670403 |
| M319T333    | 0.784543871 | 0.985396091 | 0.784543871 |
| M267T250    | 0.784443652 | 0.985390101 | 0.784443652 |
| M680T242    | 0.783905741 | 0.985357979 | 0.783905741 |
| M234T272    | 0.783894633 | 0.985357315 | 0.783894633 |
| M605T272    | 0.783779412 | 0.98535044  | 0.783779412 |
| M221T111    | 0.783713974 | 0.985346545 | 0.783713974 |
| M763T197    | 0.78361536  | 0.98534066  | 0.78361536  |
| M638T272    | 0.783581716 | 0.985338648 | 0.783581716 |
| M277T263    | 0.783565995 | 0.985337763 | 0.783565995 |
| M834T353    | 0.783561439 | 0.985337439 | 0.783561439 |
| M114T366    | 0.783495214 | 0.985333492 | 0.783495214 |
| M546T130    | 0.783363837 | 0.985325663 | 0.783363837 |
| M1067T35    | 0.783355271 | 0.985325153 | 0.783355271 |
| M627T354    | 0.783129191 | 0.985311683 | 0.783129191 |

|            |             |             |             |
|------------|-------------|-------------|-------------|
| M957T34    | 0.78295026  | 0.98530103  | 0.78295026  |
| M624T451   | 0.782803413 | 0.985292292 | 0.782803413 |
| M557T304   | 0.782702792 | 0.985286305 | 0.782702792 |
| M1069T36   | 0.782543418 | 0.985276827 | 0.782543418 |
| M862T354   | 0.782327228 | 0.985263976 | 0.782327228 |
| M758T39_1  | 0.782178994 | 0.985255169 | 0.782178994 |
| M488T272   | 0.782062086 | 0.985248226 | 0.782062086 |
| M527T272   | 0.781773013 | 0.985231067 | 0.781773013 |
| M255T210   | 0.781653457 | 0.985224032 | 0.781653457 |
| M1187T352  | 0.781513558 | 0.985215912 | 0.781513558 |
| M737T112   | 0.781453398 | 0.985212111 | 0.781453398 |
| M827T157   | 0.781133496 | 0.985193195 | 0.781133496 |
| M239T257   | 0.781038481 | 0.985187528 | 0.781038481 |
| M577T291   | 0.780871162 | 0.985177629 | 0.780871162 |
| M193T267   | 0.78063293  | 0.985163527 | 0.78063293  |
| M282T294   | 0.780509696 | 0.985156243 | 0.780509696 |
| M481T40    | 0.780451897 | 0.985152822 | 0.780451897 |
| M258T63    | 0.7803013   | 0.985143945 | 0.7803013   |
| M206T183   | 0.780082187 | 0.985130983 | 0.780082187 |
| M647T352   | 0.78003299  | 0.985128072 | 0.78003299  |
| M736T26_1  | 0.780025422 | 0.985127658 | 0.780025422 |
| M625T33    | 0.779926511 | 0.985121787 | 0.779926511 |
| M394T183   | 0.779924822 | 0.985121814 | 0.779924822 |
| M161T370   | 0.779779095 | 0.985113085 | 0.779779095 |
| M256T253   | 0.779729612 | 0.985110165 | 0.779729612 |
| M337T105   | 0.779595497 | 0.98510226  | 0.779595497 |
| M699T202   | 0.779577417 | 0.985101188 | 0.779577417 |
| M292T540_1 | 0.779318458 | 0.985085947 | 0.779318458 |
| M1111T352  | 0.779148905 | 0.985075931 | 0.779148905 |
| M589T201   | 0.779037061 | 0.985069434 | 0.779037061 |
| M529T354   | 0.778805626 | 0.985055722 | 0.778805626 |
| M549T352   | 0.778546394 | 0.985040472 | 0.778546394 |
| M736T151   | 0.778169233 | 0.985018307 | 0.778169233 |
| M409T270   | 0.778000004 | 0.98500837  | 0.778000004 |
| M1034T174  | 0.777927549 | 0.985004192 | 0.777927549 |
| M146T267   | 0.777676991 | 0.984989414 | 0.777676991 |
| M551T364   | 0.777617928 | 0.984985951 | 0.777617928 |
| M883T352_1 | 0.777513131 | 0.984979819 | 0.777513131 |
| M711T214   | 0.777479454 | 0.98497783  | 0.777479454 |
| M757T149   | 0.777344456 | 0.984969919 | 0.777344456 |
| M843T352   | 0.777317558 | 0.98496839  | 0.777317558 |
| M1019T39   | 0.777194583 | 0.984961138 | 0.777194583 |

|             |             |             |             |
|-------------|-------------|-------------|-------------|
| M785T272    | 0.777057689 | 0.984953124 | 0.777057689 |
| M303T218    | 0.776698936 | 0.984932168 | 0.776698936 |
| M991T170    | 0.776613961 | 0.984927575 | 0.776613961 |
| M465T154    | 0.77660607  | 0.984926698 | 0.77660607  |
| M653T129    | 0.77640818  | 0.98491513  | 0.77640818  |
| M1177T352   | 0.776330634 | 0.984910598 | 0.776330634 |
| M244T238    | 0.776117132 | 0.98489813  | 0.776117132 |
| M520T193    | 0.776033243 | 0.984893232 | 0.776033243 |
| M750T352    | 0.775943258 | 0.984888167 | 0.775943258 |
| M307T116    | 0.775733439 | 0.98487574  | 0.775733439 |
| M720T26_2   | 0.77539009  | 0.984855724 | 0.77539009  |
| M276T303    | 0.775285874 | 0.984849654 | 0.775285874 |
| M241T285    | 0.775270605 | 0.984848766 | 0.775270605 |
| M546T39     | 0.775211534 | 0.984845324 | 0.775211534 |
| M664T272_2  | 0.775126528 | 0.984840377 | 0.775126528 |
| M619T347    | 0.775077029 | 0.984837494 | 0.775077029 |
| M119T157    | 0.774954117 | 0.98483034  | 0.774954117 |
| M146T385    | 0.77489685  | 0.984827009 | 0.77489685  |
| M507T210    | 0.774819053 | 0.984822548 | 0.774819053 |
| M559T181    | 0.77447466  | 0.984802463 | 0.77447466  |
| M1089T352_1 | 0.774440898 | 0.984800504 | 0.774440898 |
| M722T272    | 0.774392523 | 0.984797694 | 0.774392523 |
| M276T452    | 0.774313004 | 0.984802706 | 0.774313004 |
| M307T203    | 0.77429777  | 0.984792189 | 0.77429777  |
| M314T467    | 0.774293844 | 0.984791959 | 0.774293844 |
| M62T13      | 0.77410163  | 0.984780802 | 0.77410163  |
| M1164T46    | 0.773417936 | 0.984741164 | 0.773417936 |
| M779T40     | 0.773189152 | 0.984727919 | 0.773189152 |
| M946T465_2  | 0.77260961  | 0.984694391 | 0.77260961  |
| M547T272_1  | 0.772553867 | 0.984691299 | 0.772553867 |
| M292T335_1  | 0.77253039  | 0.984689832 | 0.77253039  |
| M625T354    | 0.771853084 | 0.984650755 | 0.771853084 |
| M723T45     | 0.771576374 | 0.984634814 | 0.771576374 |
| M823T354    | 0.771538991 | 0.984632661 | 0.771538991 |
| M305T181    | 0.771489379 | 0.984629805 | 0.771489379 |
| M205T300    | 0.771480664 | 0.9846293   | 0.771480664 |
| M1128T352   | 0.771361728 | 0.984622459 | 0.771361728 |
| M275T581    | 0.771312033 | 0.984619599 | 0.771312033 |
| M265T294    | 0.77102532  | 0.984603113 | 0.77102532  |
| M248T444    | 0.770962995 | 0.984599527 | 0.770962995 |
| M201T190    | 0.770821658 | 0.984591406 | 0.770821658 |
| M333T35     | 0.770384159 | 0.984566289 | 0.770384159 |

|            |             |             |             |
|------------|-------------|-------------|-------------|
| M999T37    | 0.770321184 | 0.984562678 | 0.770321184 |
| M788T465_1 | 0.770267322 | 0.984559597 | 0.770267322 |
| M155T561   | 0.770253703 | 0.98455885  | 0.770253703 |
| M971T354_1 | 0.77020066  | 0.984555766 | 0.77020066  |
| M745T352   | 0.76993707  | 0.98454066  | 0.76993707  |
| M532T41    | 0.769803383 | 0.984533006 | 0.769803383 |
| M335T423   | 0.769530687 | 0.9845174   | 0.769530687 |
| M173T100   | 0.769487149 | 0.984514907 | 0.769487149 |
| M656T171   | 0.769331162 | 0.984505985 | 0.769331162 |
| M581T266   | 0.769266841 | 0.984502308 | 0.769266841 |
| M781T116   | 0.769231738 | 0.984500302 | 0.769231738 |
| M530T32    | 0.769198592 | 0.984498409 | 0.769198592 |
| M577T310   | 0.769143495 | 0.984495453 | 0.769143495 |
| M718T38    | 0.76907277  | 0.984491233 | 0.76907277  |
| M606T272_1 | 0.768708933 | 0.984470447 | 0.768708933 |
| M603T170   | 0.768488129 | 0.984457852 | 0.768488129 |
| M720T33    | 0.768357123 | 0.984450385 | 0.768357123 |
| M700T60    | 0.768173569 | 0.984439927 | 0.768173569 |
| M357T544   | 0.768016176 | 0.984431042 | 0.768016176 |
| M887T355   | 0.767600229 | 0.984407304 | 0.767600229 |
| M499T170   | 0.767395645 | 0.984395922 | 0.767395645 |
| M864T67    | 0.767220673 | 0.984385743 | 0.767220673 |
| M923T228   | 0.76711324  | 0.984379642 | 0.76711324  |
| M487T238   | 0.767080989 | 0.984377815 | 0.767080989 |
| M269T56    | 0.76698173  | 0.98437218  | 0.76698173  |
| M609T171   | 0.766947003 | 0.984370225 | 0.766947003 |
| M333T354   | 0.766401174 | 0.984339276 | 0.766401174 |
| M284T34_2  | 0.766348241 | 0.98433628  | 0.766348241 |
| M730T354   | 0.766252207 | 0.984330844 | 0.766252207 |
| M334T28    | 0.765984528 | 0.984315704 | 0.765984528 |
| M550T171   | 0.765772501 | 0.98430372  | 0.765772501 |
| M368T195   | 0.765562631 | 0.984291867 | 0.765562631 |
| M625T128   | 0.765532986 | 0.984290191 | 0.765532986 |
| M1149T39   | 0.765357574 | 0.984280294 | 0.765357574 |
| M1066T37   | 0.765342907 | 0.984279467 | 0.765342907 |
| M507T352   | 0.764962399 | 0.984258013 | 0.764962399 |
| M1117T354  | 0.764653337 | 0.98424061  | 0.764653337 |
| M244T254   | 0.764603537 | 0.984237809 | 0.764603537 |
| M277T320   | 0.764579275 | 0.984236538 | 0.764579275 |
| M613T235   | 0.764545591 | 0.984234547 | 0.764545591 |
| M864T340   | 0.764389844 | 0.984225841 | 0.764389844 |
| M480T196   | 0.764346632 | 0.984223364 | 0.764346632 |

|             |             |             |             |
|-------------|-------------|-------------|-------------|
| M712T190    | 0.764073999 | 0.984208044 | 0.764073999 |
| M556T171    | 0.764050916 | 0.984206742 | 0.764050916 |
| M431T354    | 0.764037367 | 0.98420598  | 0.764037367 |
| M1168T354_1 | 0.76376591  | 0.98419075  | 0.76376591  |
| M947T37     | 0.763590774 | 0.984180919 | 0.763590774 |
| M581T364    | 0.763572337 | 0.984179886 | 0.763572337 |
| M205T327    | 0.763569258 | 0.984179713 | 0.763569258 |
| M573T39     | 0.763432459 | 0.984172044 | 0.763432459 |
| M268T303    | 0.763201646 | 0.984159116 | 0.763201646 |
| M177T242    | 0.763156252 | 0.984156573 | 0.763156252 |
| M395T335    | 0.763075142 | 0.984152034 | 0.763075142 |
| M551T401    | 0.762991681 | 0.984147363 | 0.762991681 |
| M506T298    | 0.762903824 | 0.984142447 | 0.762903824 |
| M358T483_1  | 0.762821699 | 0.984137855 | 0.762821699 |
| M202T272_1  | 0.762525422 | 0.984121295 | 0.762525422 |
| M762T490    | 0.762216333 | 0.984104038 | 0.762216333 |
| M593T463    | 0.761879501 | 0.984085348 | 0.761879501 |
| M507T156    | 0.76178588  | 0.984080087 | 0.76178588  |
| M353T213    | 0.761736491 | 0.984077288 | 0.761736491 |
| M1197T354   | 0.761594852 | 0.984069419 | 0.761594852 |
| M451T45     | 0.761526217 | 0.984065578 | 0.761526217 |
| M567T247    | 0.761161006 | 0.984045264 | 0.761161006 |
| M781T148    | 0.761055815 | 0.98403971  | 0.761055815 |
| M156T343    | 0.760948883 | 0.984033478 | 0.760948883 |
| M593T208    | 0.760876464 | 0.984029455 | 0.760876464 |
| M325T378    | 0.760835399 | 0.984027177 | 0.760835399 |
| M1163T354   | 0.760819999 | 0.984026346 | 0.760819999 |
| M945T465_3  | 0.760744919 | 0.984022195 | 0.760744919 |
| M952T33     | 0.760525366 | 0.984009972 | 0.760525366 |
| M436T328    | 0.760123229 | 0.983987755 | 0.760123229 |
| M485T27     | 0.759966201 | 0.983978994 | 0.759966201 |
| M322T256    | 0.759933683 | 0.983977404 | 0.759933683 |
| M930T176    | 0.759833925 | 0.983971675 | 0.759833925 |
| M478T200    | 0.75972355  | 0.983965639 | 0.75972355  |
| M391T43     | 0.759664208 | 0.983962293 | 0.759664208 |
| M730T56     | 0.759662434 | 0.983962194 | 0.759662434 |
| M349T38     | 0.759554084 | 0.983956205 | 0.759554084 |
| M624T272    | 0.759407737 | 0.983948119 | 0.759407737 |
| M128T386    | 0.759350567 | 0.983944963 | 0.759350567 |
| M1090T352_1 | 0.75909281  | 0.983930768 | 0.75909281  |
| M364T383    | 0.758983871 | 0.98392473  | 0.758983871 |
| M235T354    | 0.758814927 | 0.983915424 | 0.758814927 |

|            |             |             |             |
|------------|-------------|-------------|-------------|
| M204T253   | 0.758780513 | 0.983913587 | 0.758780513 |
| M981T354   | 0.758718997 | 0.983910132 | 0.758718997 |
| M291T335_2 | 0.75865115  | 0.983906395 | 0.75865115  |
| M764T198   | 0.758649985 | 0.983906394 | 0.758649985 |
| M153T238   | 0.758591436 | 0.983903106 | 0.758591436 |
| M1137T354  | 0.758462591 | 0.98389639  | 0.758462591 |
| M725T272   | 0.758376158 | 0.983891264 | 0.758376158 |
| M254T48    | 0.758346622 | 0.983889634 | 0.758346622 |
| M725T354   | 0.758124146 | 0.983877402 | 0.758124146 |
| M567T248   | 0.757726355 | 0.983855556 | 0.757726355 |
| M1169T354  | 0.757483543 | 0.983842245 | 0.757483543 |
| M154T42    | 0.757290417 | 0.983832083 | 0.757290417 |
| M342T236   | 0.756964878 | 0.98381383  | 0.756964878 |
| M960T272   | 0.756191061 | 0.983771552 | 0.756191061 |
| M395T351   | 0.756029416 | 0.983762738 | 0.756029416 |
| M549T91    | 0.756019182 | 0.983762179 | 0.756019182 |
| M277T435   | 0.755753432 | 0.983747698 | 0.755753432 |
| M1198T154  | 0.755468444 | 0.983732188 | 0.755468444 |
| M181T402   | 0.755330269 | 0.983724674 | 0.755330269 |
| M220T56    | 0.755258157 | 0.983720854 | 0.755258157 |
| M1137T352  | 0.755203829 | 0.983717806 | 0.755203829 |
| M208T256   | 0.754942769 | 0.983703623 | 0.754942769 |
| M948T37_2  | 0.75483789  | 0.983697931 | 0.75483789  |
| M393T46    | 0.754783116 | 0.983694968 | 0.754783116 |
| M463T269   | 0.754738971 | 0.983692565 | 0.754738971 |
| M471T124   | 0.754119361 | 0.983659006 | 0.754119361 |
| M364T60    | 0.753944842 | 0.98364956  | 0.753944842 |
| M379T292   | 0.753881329 | 0.983646126 | 0.753881329 |
| M609T352   | 0.753815042 | 0.983642603 | 0.753815042 |
| M145T381_1 | 0.753634443 | 0.983632834 | 0.753634443 |
| M275T453   | 0.753618467 | 0.983632534 | 0.753618467 |
| M465T36    | 0.753545562 | 0.983627991 | 0.753545562 |
| M393T350   | 0.75348435  | 0.983624686 | 0.75348435  |
| M375T253   | 0.753442093 | 0.983622411 | 0.753442093 |
| M455T54    | 0.75338037  | 0.983619078 | 0.75338037  |
| M769T243   | 0.752974628 | 0.983597216 | 0.752974628 |
| M263T335   | 0.752818044 | 0.983588778 | 0.752818044 |
| M195T266   | 0.752738457 | 0.983584497 | 0.752738457 |
| M121T36    | 0.752732126 | 0.983584154 | 0.752732126 |
| M1091T354  | 0.752123192 | 0.983551436 | 0.752123192 |
| M250T408   | 0.751772113 | 0.98353261  | 0.751772113 |
| M805T156   | 0.751409652 | 0.983513203 | 0.751409652 |

|             |             |             |             |
|-------------|-------------|-------------|-------------|
| M697T18     | 0.751398427 | 0.983512609 | 0.751398427 |
| M477T54     | 0.751307482 | 0.983507737 | 0.751307482 |
| M185T151    | 0.750626318 | 0.983471575 | 0.750626318 |
| M497T40     | 0.750457674 | 0.983462383 | 0.750457674 |
| M507T272    | 0.749838113 | 0.983429461 | 0.749838113 |
| M757T349    | 0.749779044 | 0.983426265 | 0.749779044 |
| M451T352    | 0.749497495 | 0.983431674 | 0.749497495 |
| M171T36     | 0.749307593 | 0.983401246 | 0.749307593 |
| M329T34     | 0.74925484  | 0.98339844  | 0.74925484  |
| M233T408    | 0.749109559 | 0.983390738 | 0.749109559 |
| M273T242    | 0.749085756 | 0.983389481 | 0.749085756 |
| M328T33     | 0.749072049 | 0.983388753 | 0.749072049 |
| M555T479_1  | 0.749054553 | 0.983387824 | 0.749054553 |
| M482T157    | 0.74888092  | 0.983378629 | 0.74888092  |
| M1129T36    | 0.748859824 | 0.983377514 | 0.748859824 |
| M985T35     | 0.74882046  | 0.983375432 | 0.74882046  |
| M433T136    | 0.74867186  | 0.983367732 | 0.74867186  |
| M660T170    | 0.748640392 | 0.983365906 | 0.748640392 |
| M364T134    | 0.748630859 | 0.983365429 | 0.748630859 |
| M341T49     | 0.748571456 | 0.983362462 | 0.748571456 |
| M275T38     | 0.748546315 | 0.983360934 | 0.748546315 |
| M532T109    | 0.748525861 | 0.98335999  | 0.748525861 |
| M964T228    | 0.748414623 | 0.983353976 | 0.748414623 |
| M539T32     | 0.747913061 | 0.983327512 | 0.747913061 |
| M291T143    | 0.747789745 | 0.983321018 | 0.747789745 |
| M367T50     | 0.747615247 | 0.983311827 | 0.747615247 |
| M791T353    | 0.74758914  | 0.983310454 | 0.74758914  |
| M1159T352_2 | 0.747488854 | 0.983305432 | 0.747488854 |
| M302T193    | 0.74747484  | 0.983304441 | 0.74747484  |
| M615T463    | 0.747331443 | 0.983296897 | 0.747331443 |
| M1187T353   | 0.747053997 | 0.98328278  | 0.747053997 |
| M276T335    | 0.747033585 | 0.983281274 | 0.747033585 |
| M976T155    | 0.746830435 | 0.983270595 | 0.746830435 |
| M653T213    | 0.746706555 | 0.983264096 | 0.746706555 |
| M207T38     | 0.746491171 | 0.983252811 | 0.746491171 |
| M379T204    | 0.746315816 | 0.983243636 | 0.746315816 |
| M451T256    | 0.74626547  | 0.983240997 | 0.74626547  |
| M413T297    | 0.746051628 | 0.98322982  | 0.746051628 |
| M726T197    | 0.7460119   | 0.983227739 | 0.7460119   |
| M300T321    | 0.745687507 | 0.983210921 | 0.745687507 |
| M532T92     | 0.745558775 | 0.983204403 | 0.745558775 |
| M282T92     | 0.745193719 | 0.983185158 | 0.745193719 |

|             |             |             |             |
|-------------|-------------|-------------|-------------|
| M981T353    | 0.744952906 | 0.983172538 | 0.744952906 |
| M275T334    | 0.744598807 | 0.983154134 | 0.744598807 |
| M633T354    | 0.74438431  | 0.983143006 | 0.74438431  |
| M658T171    | 0.744274514 | 0.983137553 | 0.744274514 |
| M794T352    | 0.74418914  | 0.983132886 | 0.74418914  |
| M278T142    | 0.744162501 | 0.983131515 | 0.744162501 |
| M512T36     | 0.744036003 | 0.983125237 | 0.744036003 |
| M488T28     | 0.743908653 | 0.983118366 | 0.743908653 |
| M148T386    | 0.74389896  | 0.983117862 | 0.74389896  |
| M967T354    | 0.743542926 | 0.983099452 | 0.743542926 |
| M828T198    | 0.743248074 | 0.983084232 | 0.743248074 |
| M210T334    | 0.743238838 | 0.983083763 | 0.743238838 |
| M244T213    | 0.742967448 | 0.983069766 | 0.742967448 |
| M315T35_1   | 0.742919587 | 0.983067296 | 0.742919587 |
| M746T39     | 0.742630726 | 0.983052633 | 0.742630726 |
| M608T272    | 0.742583785 | 0.983050015 | 0.742583785 |
| M339T337    | 0.742529516 | 0.983047223 | 0.742529516 |
| M646T79     | 0.742473069 | 0.983044291 | 0.742473069 |
| M366T383    | 0.742218072 | 0.983031224 | 0.742218072 |
| M625T32     | 0.742019449 | 0.983021031 | 0.742019449 |
| M335T268    | 0.741840806 | 0.983011877 | 0.741840806 |
| M277T335_1  | 0.741799102 | 0.983009737 | 0.741799102 |
| M269T213    | 0.7417807   | 0.983008808 | 0.7417807   |
| M787T465    | 0.741534487 | 0.982996201 | 0.741534487 |
| M485T264    | 0.741450191 | 0.982991877 | 0.741450191 |
| M360T259_1  | 0.741438809 | 0.982991475 | 0.741438809 |
| M415T36     | 0.741118475 | 0.982974925 | 0.741118475 |
| M641T57     | 0.741032989 | 0.982970564 | 0.741032989 |
| M1188T354_1 | 0.740918627 | 0.982964726 | 0.740918627 |
| M265T299    | 0.740848175 | 0.982961132 | 0.740848175 |
| M319T353    | 0.740791153 | 0.982958482 | 0.740791153 |
| M359T34     | 0.740708084 | 0.982954054 | 0.740708084 |
| M247T262    | 0.740622726 | 0.982949643 | 0.740622726 |
| M697T212    | 0.740561045 | 0.9829465   | 0.740561045 |
| M941T352    | 0.74033468  | 0.982934981 | 0.74033468  |
| M437T299    | 0.740244035 | 0.982930371 | 0.740244035 |
| M402T211    | 0.739930515 | 0.982914443 | 0.739930515 |
| M709T354    | 0.73990104  | 0.982912949 | 0.73990104  |
| M263T34_1   | 0.739835823 | 0.982909638 | 0.739835823 |
| M853T38     | 0.739781099 | 0.98290686  | 0.739781099 |
| M113T27_2   | 0.739738484 | 0.982904702 | 0.739738484 |
| M766T196    | 0.739691142 | 0.9829023   | 0.739691142 |

|             |             |             |             |
|-------------|-------------|-------------|-------------|
| M609T405    | 0.738899502 | 0.98286224  | 0.738899502 |
| M565T353    | 0.738850756 | 0.98285978  | 0.738850756 |
| M141T34     | 0.738820193 | 0.982858287 | 0.738820193 |
| M576T34     | 0.738816178 | 0.982858036 | 0.738816178 |
| M711T170    | 0.738799426 | 0.982857188 | 0.738799426 |
| M423T212    | 0.738524878 | 0.98284334  | 0.738524878 |
| M572T193    | 0.738338708 | 0.982833961 | 0.738338708 |
| M835T71     | 0.738338342 | 0.982833942 | 0.738338342 |
| M337T244    | 0.738144601 | 0.982824192 | 0.738144601 |
| M1175T261_2 | 0.738055795 | 0.982819725 | 0.738055795 |
| M583T299    | 0.737944268 | 0.982814335 | 0.737944268 |
| M967T228    | 0.737851129 | 0.98280944  | 0.737851129 |
| M757T118    | 0.737828275 | 0.982808292 | 0.737828275 |
| M981T81     | 0.737678465 | 0.982800769 | 0.737678465 |
| M239T254    | 0.73747258  | 0.982790443 | 0.73747258  |
| M547T168    | 0.737412964 | 0.982787453 | 0.737412964 |
| M209T225    | 0.737262872 | 0.982779937 | 0.737262872 |
| M395T303    | 0.737123811 | 0.982772986 | 0.737123811 |
| M417T32     | 0.736866064 | 0.982760085 | 0.736866064 |
| M715T112    | 0.736674502 | 0.982750517 | 0.736674502 |
| M456T352    | 0.73652498  | 0.982743104 | 0.73652498  |
| M428T513    | 0.736343245 | 0.982734449 | 0.736343245 |
| M421T311    | 0.735990492 | 0.982716434 | 0.735990492 |
| M361T280    | 0.735329673 | 0.982683665 | 0.735329673 |
| M585T352    | 0.735191633 | 0.982676774 | 0.735191633 |
| M1034T34    | 0.735152585 | 0.982674842 | 0.735152585 |
| M939T352    | 0.735037592 | 0.982669171 | 0.735037592 |
| M258T376    | 0.734990692 | 0.982666829 | 0.734990692 |
| M160T242    | 0.734850706 | 0.982659903 | 0.734850706 |
| M531T320    | 0.734812851 | 0.982658032 | 0.734812851 |
| M227T212    | 0.73464213  | 0.982649598 | 0.73464213  |
| M353T352    | 0.734587944 | 0.982646931 | 0.734587944 |
| M425T581    | 0.734319981 | 0.982633702 | 0.734319981 |
| M307T33     | 0.734269167 | 0.982631269 | 0.734269167 |
| M680T175    | 0.734183098 | 0.982626956 | 0.734183098 |
| M421T263    | 0.73410861  | 0.982623288 | 0.73410861  |
| M337T35_1   | 0.734049317 | 0.9826332   | 0.734049317 |
| M118T257    | 0.733818707 | 0.982609024 | 0.733818707 |
| M305T50     | 0.733757739 | 0.982606026 | 0.733757739 |
| M183T357    | 0.733733236 | 0.982604824 | 0.733733236 |
| M1083T36    | 0.733587402 | 0.982597666 | 0.733587402 |
| M1189T291   | 0.733545467 | 0.982595602 | 0.733545467 |

|            |             |             |             |
|------------|-------------|-------------|-------------|
| M430T272_2 | 0.733324023 | 0.98258477  | 0.733324023 |
| M1019T354  | 0.733248739 | 0.982581046 | 0.733248739 |
| M569T122   | 0.732991896 | 0.982568467 | 0.732991896 |
| M317T373   | 0.732979765 | 0.982568133 | 0.732979765 |
| M551T342   | 0.732921121 | 0.982565004 | 0.732921121 |
| M271T33    | 0.73283406  | 0.982560745 | 0.73283406  |
| M223T59    | 0.732619162 | 0.982550244 | 0.732619162 |
| M1000T35   | 0.732544474 | 0.982546597 | 0.732544474 |
| M613T47    | 0.732036187 | 0.98252182  | 0.732036187 |
| M432T204   | 0.731926405 | 0.982516552 | 0.731926405 |
| M213T35    | 0.731596518 | 0.982500443 | 0.731596518 |
| M713T213   | 0.731491963 | 0.982495368 | 0.731491963 |
| M251T585   | 0.73147001  | 0.982494301 | 0.73147001  |
| M147T256   | 0.731386922 | 0.982490481 | 0.731386922 |
| M558T38    | 0.731237973 | 0.982483135 | 0.731237973 |
| M227T297   | 0.731198459 | 0.982481138 | 0.731198459 |
| M498T127   | 0.731176207 | 0.982480058 | 0.731176207 |
| M554T168   | 0.731016405 | 0.982472324 | 0.731016405 |
| M571T34    | 0.730863043 | 0.982464902 | 0.730863043 |
| M365T238   | 0.730830554 | 0.982463332 | 0.730830554 |
| M573T429   | 0.730662969 | 0.982455233 | 0.730662969 |
| M461T45    | 0.730379775 | 0.982440649 | 0.730379775 |
| M1025T354  | 0.730266243 | 0.98243631  | 0.730266243 |
| M206T67    | 0.73014389  | 0.982430201 | 0.73014389  |
| M261T92    | 0.729677334 | 0.982407767 | 0.729677334 |
| M981T352   | 0.729613714 | 0.982404713 | 0.729613714 |
| M389T220   | 0.729336213 | 0.982391399 | 0.729336213 |
| M595T292   | 0.729335064 | 0.982391345 | 0.729335064 |
| M232T452   | 0.729260301 | 0.982387762 | 0.729260301 |
| M205T401   | 0.729023471 | 0.982376425 | 0.729023471 |
| M166T319   | 0.728812115 | 0.982366324 | 0.728812115 |
| M283T41    | 0.728747482 | 0.982363232 | 0.728747482 |
| M358T68    | 0.728681168 | 0.982360156 | 0.728681168 |
| M950T465   | 0.728503177 | 0.982351678 | 0.728503177 |
| M597T148   | 0.728472077 | 0.982350091 | 0.728472077 |
| M152T158   | 0.728040556 | 0.982329542 | 0.728040556 |
| M704T57    | 0.72773796  | 0.982315163 | 0.72773796  |
| M140T352   | 0.727654995 | 0.982348472 | 0.727654995 |
| M539T320   | 0.727544123 | 0.982305977 | 0.727544123 |
| M153T158   | 0.72736603  | 0.982297529 | 0.72736603  |
| M425T221   | 0.727320169 | 0.982295357 | 0.727320169 |
| M837T70    | 0.727246271 | 0.982291859 | 0.727246271 |

|             |             |             |             |
|-------------|-------------|-------------|-------------|
| M138T286    | 0.727154764 | 0.982287529 | 0.727154764 |
| M315T347    | 0.727118435 | 0.98228581  | 0.727118435 |
| M411T344    | 0.727054315 | 0.982282778 | 0.727054315 |
| M242T284    | 0.726935661 | 0.98227724  | 0.726935661 |
| M97T348     | 0.726814528 | 0.982271452 | 0.726814528 |
| M271T155    | 0.726708457 | 0.982266447 | 0.726708457 |
| M547T259    | 0.726612691 | 0.982261931 | 0.726612691 |
| M363T203    | 0.726480772 | 0.982255726 | 0.726480772 |
| M245T278    | 0.726284901 | 0.982246492 | 0.726284901 |
| M105T37     | 0.726024846 | 0.982234267 | 0.726024846 |
| M478T199    | 0.725958084 | 0.982231171 | 0.725958084 |
| M853T141    | 0.725897988 | 0.982228327 | 0.725897988 |
| M433T246    | 0.725825376 | 0.982224902 | 0.725825376 |
| M662T170    | 0.725735665 | 0.982220695 | 0.725735665 |
| M242T59     | 0.72555958  | 0.982212443 | 0.72555958  |
| M134T157_2  | 0.725544559 | 0.982211799 | 0.725544559 |
| M343T94     | 0.725499444 | 0.982209632 | 0.725499444 |
| M303T374    | 0.725497522 | 0.982209538 | 0.725497522 |
| M265T26     | 0.725250661 | 0.982198009 | 0.725250661 |
| M451T175    | 0.725173004 | 0.982194362 | 0.725173004 |
| M742T256    | 0.724966364 | 0.98218471  | 0.724966364 |
| M1198T171   | 0.724897655 | 0.982181504 | 0.724897655 |
| M255T253    | 0.724775362 | 0.982175809 | 0.724775362 |
| M1110T352_2 | 0.724624023 | 0.982168756 | 0.724624023 |
| M166T193    | 0.724561895 | 0.982165867 | 0.724561895 |
| M153T380    | 0.724404575 | 0.982158544 | 0.724404575 |
| M1061T354_2 | 0.723992467 | 0.982139954 | 0.723992467 |
| M163T429    | 0.723479698 | 0.982115669 | 0.723479698 |
| M770T354    | 0.723327722 | 0.982108648 | 0.723327722 |
| M1110T353   | 0.723017151 | 0.982094329 | 0.723017151 |
| M743T38     | 0.722976556 | 0.982092451 | 0.722976556 |
| M277T396    | 0.722780141 | 0.982083408 | 0.722780141 |
| M638T344    | 0.722518541 | 0.982071383 | 0.722518541 |
| M243T345_1  | 0.722405355 | 0.982066194 | 0.722405355 |
| M415T272    | 0.72239415  | 0.982065672 | 0.72239415  |
| M1167T354_1 | 0.722253266 | 0.98205921  | 0.722253266 |
| M247T231    | 0.721942715 | 0.982044988 | 0.721942715 |
| M1079T354   | 0.7218992   | 0.982042996 | 0.7218992   |
| M977T352    | 0.721862107 | 0.982041299 | 0.721862107 |
| M921T354    | 0.72178378  | 0.982037953 | 0.72178378  |
| M701T178    | 0.721402539 | 0.982020315 | 0.721402539 |
| M185T192    | 0.720925212 | 0.981998662 | 0.720925212 |

|             |             |             |             |
|-------------|-------------|-------------|-------------|
| M337T351    | 0.720801986 | 0.981992991 | 0.720801986 |
| M904T210    | 0.720779723 | 0.981992222 | 0.720779723 |
| M186T253    | 0.720662685 | 0.981986662 | 0.720662685 |
| M381T127    | 0.720624539 | 0.981984939 | 0.720624539 |
| M207T326    | 0.720605167 | 0.981984206 | 0.720605167 |
| M446T290    | 0.720549356 | 0.981981531 | 0.720549356 |
| M159T35     | 0.720043506 | 0.981958635 | 0.720043506 |
| M275T322    | 0.719781877 | 0.981946838 | 0.719781877 |
| M980T352    | 0.719612828 | 0.981939218 | 0.719612828 |
| M655T212    | 0.719483668 | 0.981933403 | 0.719483668 |
| M287T135    | 0.719457814 | 0.981932242 | 0.719457814 |
| M1181T465_2 | 0.719450418 | 0.981931908 | 0.719450418 |
| M889T173    | 0.719422364 | 0.981930648 | 0.719422364 |
| M935T32     | 0.719411092 | 0.981930151 | 0.719411092 |
| M133T195    | 0.719261011 | 0.981923394 | 0.719261011 |
| M578T41     | 0.71875919  | 0.98190089  | 0.71875919  |
| M391T53     | 0.718723362 | 0.981899285 | 0.718723362 |
| M131T257    | 0.718455813 | 0.981887325 | 0.718455813 |
| M297T333    | 0.718400129 | 0.981884849 | 0.718400129 |
| M217T462    | 0.718191669 | 0.981875534 | 0.718191669 |
| M874T39     | 0.718031024 | 0.981868376 | 0.718031024 |
| M522T189    | 0.717992231 | 0.981867121 | 0.717992231 |
| M254T46     | 0.717915728 | 0.981863243 | 0.717915728 |
| M933T97     | 0.717797649 | 0.98185799  | 0.717797649 |
| M319T41     | 0.717673265 | 0.981852463 | 0.717673265 |
| M271T165    | 0.717498757 | 0.981844719 | 0.717498757 |
| M293T198    | 0.717486746 | 0.981844183 | 0.717486746 |
| M229T118    | 0.717389326 | 0.981839862 | 0.717389326 |
| M295T333    | 0.717319144 | 0.981836751 | 0.717319144 |
| M315T157    | 0.717282518 | 0.981835131 | 0.717282518 |
| M497T170    | 0.717265993 | 0.981834656 | 0.717265993 |
| M356T163    | 0.71709989  | 0.981827045 | 0.71709989  |
| M432T99     | 0.717098701 | 0.981826992 | 0.717098701 |
| M723T272_1  | 0.716905269 | 0.981818442 | 0.716905269 |
| M575T356    | 0.716882422 | 0.981817692 | 0.716882422 |
| M806T198    | 0.71679195  | 0.981813433 | 0.71679195  |
| M844T67     | 0.716489692 | 0.981800109 | 0.716489692 |
| M1012T33    | 0.71637848  | 0.981795216 | 0.71637848  |
| M664T171    | 0.716156627 | 0.981785459 | 0.716156627 |
| M633T37     | 0.716104072 | 0.981783148 | 0.716104072 |
| M755T148    | 0.716051058 | 0.981780835 | 0.716051058 |
| M401T341    | 0.715411218 | 0.981753147 | 0.715411218 |

|            |             |             |             |
|------------|-------------|-------------|-------------|
| M223T39    | 0.71531178  | 0.981748492 | 0.71531178  |
| M669T421   | 0.715272673 | 0.981746766 | 0.715272673 |
| M135T229   | 0.715180361 | 0.981742731 | 0.715180361 |
| M284T367   | 0.715111143 | 0.981739702 | 0.715111143 |
| M339T40_2  | 0.714872753 | 0.981729318 | 0.714872753 |
| M379T356   | 0.714469742 | 0.981711806 | 0.714469742 |
| M982T32    | 0.714442315 | 0.981710618 | 0.714442315 |
| M831T33    | 0.714153516 | 0.981698111 | 0.714153516 |
| M509T237   | 0.713993935 | 0.9816912   | 0.713993935 |
| M84T199    | 0.71390391  | 0.981687311 | 0.71390391  |
| M135T260   | 0.713862998 | 0.981685544 | 0.713862998 |
| M551T91    | 0.713599125 | 0.981674161 | 0.713599125 |
| M353T253   | 0.713511642 | 0.981670398 | 0.713511642 |
| M195T59    | 0.71334633  | 0.981663335 | 0.71334633  |
| M315T408   | 0.713312093 | 0.981661806 | 0.713312093 |
| M697T113   | 0.713290577 | 0.981660879 | 0.713290577 |
| M603T32    | 0.71327025  | 0.981660007 | 0.71327025  |
| M837T352   | 0.713127781 | 0.981653888 | 0.713127781 |
| M302T238   | 0.713114464 | 0.981653317 | 0.713114464 |
| M107T157   | 0.713099775 | 0.981652687 | 0.713099775 |
| M959T354   | 0.712872651 | 0.981642941 | 0.712872651 |
| M70T95     | 0.712843772 | 0.981641702 | 0.712843772 |
| M217T334   | 0.712749595 | 0.98163767  | 0.712749595 |
| M1157T354  | 0.712737309 | 0.981637145 | 0.712737309 |
| M271T55    | 0.712417678 | 0.981623483 | 0.712417678 |
| M72T233    | 0.712116514 | 0.981610631 | 0.712116514 |
| M234T182   | 0.712072639 | 0.981608766 | 0.712072639 |
| M205T59    | 0.711972024 | 0.981604481 | 0.711972024 |
| M651T406   | 0.711904602 | 0.981602088 | 0.711904602 |
| M1110T354  | 0.71186619  | 0.981599978 | 0.71186619  |
| M170T258   | 0.711746267 | 0.981594882 | 0.711746267 |
| M132T242_1 | 0.711719374 | 0.98159374  | 0.711719374 |
| M933T42    | 0.711574083 | 0.981587575 | 0.711574083 |
| M654T169   | 0.711545324 | 0.981586358 | 0.711545324 |
| M627T162   | 0.711243461 | 0.981573569 | 0.711243461 |
| M208T157   | 0.711115834 | 0.981568171 | 0.711115834 |
| M597T190   | 0.710940062 | 0.98156075  | 0.710940062 |
| M1158T352  | 0.710930439 | 0.981560344 | 0.710930439 |
| M325T390   | 0.710785297 | 0.981554222 | 0.710785297 |
| M655T379   | 0.710508677 | 0.981542577 | 0.710508677 |
| M298T319   | 0.71044363  | 0.981539843 | 0.71044363  |
| M206T231   | 0.710425587 | 0.981539084 | 0.710425587 |

|            |             |             |             |
|------------|-------------|-------------|-------------|
| M581T342   | 0.710202807 | 0.981529733 | 0.710202807 |
| M971T354_2 | 0.710197501 | 0.981529508 | 0.710197501 |
| M960T42    | 0.709822798 | 0.981513814 | 0.709822798 |
| M125T35    | 0.709360189 | 0.981494507 | 0.709360189 |
| M685T32    | 0.709310043 | 0.981492428 | 0.709310043 |
| M549T428   | 0.709226126 | 0.981488924 | 0.709226126 |
| M157T93    | 0.709208994 | 0.981488212 | 0.709208994 |
| M1119T352  | 0.709189384 | 0.981487509 | 0.709189384 |
| M147T180   | 0.709185826 | 0.981487338 | 0.709185826 |
| M193T34_2  | 0.708995321 | 0.98147933  | 0.708995321 |
| M521T272   | 0.708958224 | 0.981477788 | 0.708958224 |
| M291T273   | 0.708749364 | 0.981469146 | 0.708749364 |
| M315T373   | 0.708079686 | 0.981441453 | 0.708079686 |
| M243T345_2 | 0.707977604 | 0.981437399 | 0.707977604 |
| M666T23    | 0.707920107 | 0.981434879 | 0.707920107 |
| M399T50    | 0.707905779 | 0.981434369 | 0.707905779 |
| M421T335   | 0.707859403 | 0.98143235  | 0.707859403 |
| M417T248   | 0.707843179 | 0.981431992 | 0.707843179 |
| M725T403   | 0.707385126 | 0.981412913 | 0.707385126 |
| M185T303   | 0.707251535 | 0.981407442 | 0.707251535 |
| M688T193   | 0.707166919 | 0.981403981 | 0.707166919 |
| M481T153   | 0.706773363 | 0.981387918 | 0.706773363 |
| M807T138   | 0.706746648 | 0.981386829 | 0.706746648 |
| M331T305   | 0.70651758  | 0.981377508 | 0.70651758  |
| M1186T353  | 0.706272612 | 0.981367559 | 0.706272612 |
| M639T36    | 0.706268424 | 0.98136743  | 0.706268424 |
| M281T356   | 0.705748841 | 0.981346735 | 0.705748841 |
| M815T33    | 0.705681097 | 0.981343862 | 0.705681097 |
| M791T465   | 0.705563568 | 0.981338883 | 0.705563568 |
| M771T89_1  | 0.705432366 | 0.981333604 | 0.705432366 |
| M505T79    | 0.705346478 | 0.981330142 | 0.705346478 |
| M387T32    | 0.705267403 | 0.981326971 | 0.705267403 |
| M429T45    | 0.70522054  | 0.9813253   | 0.70522054  |
| M497T212   | 0.704754061 | 0.981306372 | 0.704754061 |
| M783T114   | 0.704413307 | 0.981292756 | 0.704413307 |
| M136T156   | 0.70433601  | 0.98128967  | 0.70433601  |
| M582T298   | 0.704293959 | 0.981288225 | 0.704293959 |
| M251T186   | 0.704277781 | 0.981287349 | 0.704277781 |
| M164T256   | 0.704164791 | 0.98128285  | 0.704164791 |
| M705T264   | 0.70414928  | 0.981282704 | 0.70414928  |
| M632T354   | 0.704000992 | 0.981276334 | 0.704000992 |
| M257T277   | 0.703887375 | 0.98127182  | 0.703887375 |

|             |             |             |             |
|-------------|-------------|-------------|-------------|
| M518T154    | 0.703881758 | 0.981271669 | 0.703881758 |
| M707T413    | 0.703837483 | 0.981270009 | 0.703837483 |
| M286T299_1  | 0.703806757 | 0.981268622 | 0.703806757 |
| M1196T32    | 0.703720384 | 0.981265195 | 0.703720384 |
| M437T58     | 0.703689637 | 0.981263977 | 0.703689637 |
| M259T647    | 0.703687921 | 0.981264254 | 0.703687921 |
| M513T428    | 0.703230456 | 0.981245835 | 0.703230456 |
| M150T34     | 0.703117755 | 0.981241469 | 0.703117755 |
| M639T380    | 0.702647764 | 0.981222889 | 0.702647764 |
| M855T85     | 0.702562662 | 0.981219549 | 0.702562662 |
| M343T91     | 0.702507299 | 0.981217378 | 0.702507299 |
| M461T380    | 0.70250053  | 0.981217114 | 0.70250053  |
| M285T130    | 0.702397964 | 0.981213097 | 0.702397964 |
| M374T306    | 0.702241514 | 0.981206976 | 0.702241514 |
| M527T428    | 0.70217973  | 0.981204566 | 0.70217973  |
| M619T114    | 0.702086726 | 0.981200929 | 0.702086726 |
| M1188T352   | 0.701819617 | 0.981190524 | 0.701819617 |
| M1039T352_1 | 0.701705404 | 0.981186069 | 0.701705404 |
| M339T328    | 0.701672134 | 0.981184776 | 0.701672134 |
| M754T52     | 0.701478884 | 0.98117727  | 0.701478884 |
| M855T352    | 0.701269995 | 0.981169242 | 0.701269995 |
| M547T272_2  | 0.701101665 | 0.981162659 | 0.701101665 |
| M546T206    | 0.70106118  | 0.981161101 | 0.70106118  |
| M1114T171   | 0.701001186 | 0.981158774 | 0.701001186 |
| M1143T36    | 0.700868916 | 0.981153667 | 0.700868916 |
| M492T144    | 0.700805728 | 0.981151232 | 0.700805728 |
| M485T380    | 0.700701925 | 0.981147232 | 0.700701925 |
| M283T292    | 0.700622284 | 0.981144165 | 0.700622284 |
| M158T26     | 0.700446361 | 0.981137402 | 0.700446361 |
| M260T246    | 0.70026897  | 0.981130983 | 0.70026897  |
| M1088T353   | 0.700249087 | 0.98112984  | 0.700249087 |
| M344T197    | 0.699976946 | 0.98111941  | 0.699976946 |
| M511T157_1  | 0.699926218 | 0.98111747  | 0.699926218 |
| M231T260    | 0.699849082 | 0.981114522 | 0.699849082 |
| M412T491    | 0.699779166 | 0.981111865 | 0.699779166 |
| M605T451    | 0.699771354 | 0.981111556 | 0.699771354 |
| M223T222    | 0.699770951 | 0.981111664 | 0.699770951 |
| M336T352    | 0.699761062 | 0.981111166 | 0.699761062 |
| M119T299    | 0.699610984 | 0.981105918 | 0.699610984 |
| M162T398    | 0.699504193 | 0.981101376 | 0.699504193 |
| M195T465    | 0.699483574 | 0.98110077  | 0.699483574 |
| M425T204    | 0.699420539 | 0.981098193 | 0.699420539 |

|             |             |             |             |
|-------------|-------------|-------------|-------------|
| M601T40     | 0.699369021 | 0.981096571 | 0.699369021 |
| M227T381    | 0.699223082 | 0.981090698 | 0.699223082 |
| M189T33     | 0.69900703  | 0.981082501 | 0.69900703  |
| M488T169    | 0.698875952 | 0.981077557 | 0.698875952 |
| M281T243    | 0.698787105 | 0.981074182 | 0.698787105 |
| M559T32     | 0.698550968 | 0.981065272 | 0.698550968 |
| M660T169    | 0.698227306 | 0.981053093 | 0.698227306 |
| M762T148    | 0.698142398 | 0.981049906 | 0.698142398 |
| M207T261    | 0.698060777 | 0.981046848 | 0.698060777 |
| M398T203    | 0.698048193 | 0.98104637  | 0.698048193 |
| M992T352_2  | 0.697995627 | 0.98104441  | 0.697995627 |
| M633T247    | 0.697418451 | 0.981022846 | 0.697418451 |
| M1032T352_2 | 0.697381277 | 0.98102146  | 0.697381277 |
| M447T154    | 0.697365256 | 0.981020856 | 0.697365256 |
| M811T130    | 0.697305851 | 0.981018645 | 0.697305851 |
| M421T303    | 0.697092204 | 0.98101086  | 0.697092204 |
| M140T90     | 0.696994037 | 0.981007064 | 0.696994037 |
| M739T150    | 0.696990227 | 0.981006921 | 0.696990227 |
| M933T161    | 0.696912269 | 0.981004032 | 0.696912269 |
| M956T25     | 0.696460153 | 0.980987322 | 0.696460153 |
| M1107T36    | 0.696403413 | 0.980985231 | 0.696403413 |
| M672T213    | 0.696316643 | 0.980982035 | 0.696316643 |
| M151T228    | 0.696215072 | 0.980978298 | 0.696215072 |
| M896T145    | 0.696117933 | 0.980974737 | 0.696117933 |
| M1085T352   | 0.696070815 | 0.980972996 | 0.696070815 |
| M847T131    | 0.696020434 | 0.980971147 | 0.696020434 |
| M336T262    | 0.695881947 | 0.98096607  | 0.695881947 |
| M521T97     | 0.695649253 | 0.980957601 | 0.695649253 |
| M558T170    | 0.69505793  | 0.980936022 | 0.69505793  |
| M213T415    | 0.695023911 | 0.980934787 | 0.695023911 |
| M213T55     | 0.694914228 | 0.980930811 | 0.694914228 |
| M321T215    | 0.694801095 | 0.980926699 | 0.694801095 |
| M617T293    | 0.694660383 | 0.980921646 | 0.694660383 |
| M70T374     | 0.694612205 | 0.980919869 | 0.694612205 |
| M951T113    | 0.69442044  | 0.980913366 | 0.69442044  |
| M927T354    | 0.694383992 | 0.980911633 | 0.694383992 |
| M1039T349   | 0.694361184 | 0.98091081  | 0.694361184 |
| M1130T352   | 0.693917655 | 0.980894873 | 0.693917655 |
| M292T395    | 0.693859858 | 0.980892799 | 0.693859858 |
| M845T67     | 0.693828847 | 0.980891695 | 0.693828847 |
| M593T415    | 0.69375318  | 0.980888987 | 0.69375318  |
| M513T92     | 0.693433288 | 0.980877551 | 0.693433288 |

|             |             |             |             |
|-------------|-------------|-------------|-------------|
| M541T35     | 0.693246994 | 0.980870921 | 0.693246994 |
| M517T39     | 0.692982028 | 0.98086151  | 0.692982028 |
| M325T292    | 0.692908128 | 0.980858901 | 0.692908128 |
| M80T206     | 0.692887258 | 0.980858149 | 0.692887258 |
| M788T147    | 0.692825147 | 0.980855945 | 0.692825147 |
| M311T154    | 0.692703099 | 0.980851636 | 0.692703099 |
| M1187T354_2 | 0.692679876 | 0.980850933 | 0.692679876 |
| M474T135    | 0.692462815 | 0.980843144 | 0.692462815 |
| M393T251    | 0.692425142 | 0.980842124 | 0.692425142 |
| M917T173    | 0.69238355  | 0.980840352 | 0.69238355  |
| M1079T352   | 0.692089772 | 0.980830035 | 0.692089772 |
| M1090T352_2 | 0.691913343 | 0.980823836 | 0.691913343 |
| M506T211    | 0.691848972 | 0.980821582 | 0.691848972 |
| M118T27     | 0.691843309 | 0.980821384 | 0.691843309 |
| M379T53     | 0.69163214  | 0.980814002 | 0.69163214  |
| M834T189    | 0.691324926 | 0.980803669 | 0.691324926 |
| M132T168    | 0.691269757 | 0.980801379 | 0.691269757 |
| M164T273    | 0.69124812  | 0.980800633 | 0.69124812  |
| M147T181    | 0.691054331 | 0.980793901 | 0.691054331 |
| M751T292    | 0.691005587 | 0.980792212 | 0.691005587 |
| M569T201    | 0.691003809 | 0.980792466 | 0.691003809 |
| M812T354    | 0.690998192 | 0.980791955 | 0.690998192 |
| M1097T34_1  | 0.690967063 | 0.980790877 | 0.690967063 |
| M82T26      | 0.690937594 | 0.980789855 | 0.690937594 |
| M401T180_1  | 0.69079701  | 0.980784993 | 0.69079701  |
| M435T98     | 0.69068158  | 0.980781006 | 0.69068158  |
| M431T272    | 0.690439566 | 0.980772666 | 0.690439566 |
| M767T353    | 0.690414214 | 0.980771794 | 0.690414214 |
| M1006T177   | 0.690394262 | 0.98077139  | 0.690394262 |
| M483T26     | 0.690058817 | 0.980759594 | 0.690058817 |
| M787T131    | 0.689517371 | 0.980741567 | 0.689517371 |
| M171T268    | 0.689465882 | 0.980739737 | 0.689465882 |
| M174T264    | 0.689357727 | 0.980735695 | 0.689357727 |
| M205T286    | 0.689313971 | 0.980734416 | 0.689313971 |
| M105T381    | 0.689292702 | 0.98073348  | 0.689292702 |
| M337T292    | 0.689286215 | 0.980733259 | 0.689286215 |
| M508T443    | 0.689215842 | 0.980730916 | 0.689215842 |
| M673T192    | 0.689149561 | 0.98072881  | 0.689149561 |
| M501T170    | 0.689073013 | 0.980726308 | 0.689073013 |
| M431T250    | 0.689003476 | 0.980723685 | 0.689003476 |
| M391T124    | 0.688784631 | 0.980716298 | 0.688784631 |
| M137T354    | 0.688760895 | 0.980715499 | 0.688760895 |

|             |             |             |             |
|-------------|-------------|-------------|-------------|
| M736T26_2   | 0.688757765 | 0.980715392 | 0.688757765 |
| M336T68     | 0.688221585 | 0.98069739  | 0.688221585 |
| M257T34_1   | 0.688208715 | 0.980696959 | 0.688208715 |
| M301T374    | 0.688114842 | 0.980693816 | 0.688114842 |
| M321T183    | 0.688097657 | 0.980693257 | 0.688097657 |
| M794T71     | 0.687962218 | 0.980715295 | 0.687962218 |
| M201T278    | 0.687918936 | 0.980687276 | 0.687918936 |
| M1059T354_1 | 0.687286612 | 0.980666411 | 0.687286612 |
| M950T464_1  | 0.686805642 | 0.980650434 | 0.686805642 |
| M486T106    | 0.686699766 | 0.980646958 | 0.686699766 |
| M348T230    | 0.686698542 | 0.98064692  | 0.686698542 |
| M433T374    | 0.686698293 | 0.980646915 | 0.686698293 |
| M116T374    | 0.686373519 | 0.980636279 | 0.686373519 |
| M289T116    | 0.686364533 | 0.980636364 | 0.686364533 |
| M204T433    | 0.686323552 | 0.980634648 | 0.686323552 |
| M471T374    | 0.686318455 | 0.980634478 | 0.686318455 |
| M295T357    | 0.686307407 | 0.980634121 | 0.686307407 |
| M459T203    | 0.686252833 | 0.980632357 | 0.686252833 |
| M793T96     | 0.686232012 | 0.980631665 | 0.686232012 |
| M219T262    | 0.686174483 | 0.980629787 | 0.686174483 |
| M387T37     | 0.685982936 | 0.980623568 | 0.685982936 |
| M411T35     | 0.685968394 | 0.980623093 | 0.685968394 |
| M476T119    | 0.685954167 | 0.980623078 | 0.685954167 |
| M715T243    | 0.685592403 | 0.980610933 | 0.685592403 |
| M692T199    | 0.685379811 | 0.98060404  | 0.685379811 |
| M535T354    | 0.685293305 | 0.980601255 | 0.685293305 |
| M339T352    | 0.685278624 | 0.980600781 | 0.685278624 |
| M160T35     | 0.68520756  | 0.980598496 | 0.68520756  |
| M717T171    | 0.685043982 | 0.980593243 | 0.685043982 |
| M677T35     | 0.684838208 | 0.980586654 | 0.684838208 |
| M761T353    | 0.684492217 | 0.980575616 | 0.684492217 |
| M709T171    | 0.684405596 | 0.980573149 | 0.684405596 |
| M369T565    | 0.684340467 | 0.980570791 | 0.684340467 |
| M589T260    | 0.684333266 | 0.980570633 | 0.684333266 |
| M194T249    | 0.68417536  | 0.980565551 | 0.68417536  |
| M1190T171   | 0.683922972 | 0.980557568 | 0.683922972 |
| M689T463    | 0.683553199 | 0.980545945 | 0.683553199 |
| M891T292_1  | 0.683415193 | 0.980541596 | 0.683415193 |
| M1069T354_1 | 0.683389603 | 0.980540865 | 0.683389603 |
| M209T293    | 0.683354858 | 0.980539704 | 0.683354858 |
| M1167T354_2 | 0.683317145 | 0.980538525 | 0.683317145 |
| M1013T354   | 0.683316693 | 0.98053851  | 0.683316693 |

|             |             |             |             |
|-------------|-------------|-------------|-------------|
| M743T351    | 0.683186681 | 0.980534444 | 0.683186681 |
| M293T272    | 0.683165579 | 0.980533786 | 0.683165579 |
| M195T493    | 0.682931099 | 0.98052696  | 0.682931099 |
| M129T402    | 0.682906159 | 0.980525699 | 0.682906159 |
| M231T323    | 0.682896389 | 0.980525396 | 0.682896389 |
| M996T139    | 0.682716657 | 0.980519812 | 0.682716657 |
| M270T143    | 0.682526164 | 0.980513912 | 0.682526164 |
| M385T201    | 0.682449242 | 0.980511532 | 0.682449242 |
| M346T250    | 0.68173979  | 0.980489722 | 0.68173979  |
| M665T354    | 0.68170705  | 0.980488888 | 0.68170705  |
| M315T288    | 0.681690651 | 0.980488241 | 0.681690651 |
| M233T264    | 0.681609608 | 0.980485748 | 0.681609608 |
| M370T231    | 0.681458942 | 0.980481153 | 0.681458942 |
| M576T92     | 0.681416767 | 0.980479869 | 0.681416767 |
| M509T385    | 0.681335577 | 0.980477399 | 0.681335577 |
| M435T374    | 0.681055088 | 0.980468894 | 0.681055088 |
| M160T397    | 0.680705898 | 0.980458355 | 0.680705898 |
| M291T247    | 0.680703479 | 0.980458283 | 0.680703479 |
| M425T541    | 0.680247183 | 0.980444598 | 0.680247183 |
| M637T340    | 0.680238852 | 0.980444355 | 0.680238852 |
| M858T135    | 0.680207056 | 0.980443398 | 0.680207056 |
| M429T214    | 0.680112783 | 0.980440575 | 0.680112783 |
| M205T39     | 0.680056779 | 0.980438914 | 0.680056779 |
| M996T161    | 0.680050245 | 0.980438721 | 0.680050245 |
| M999T42     | 0.679954831 | 0.980435879 | 0.679954831 |
| M629T451    | 0.679937469 | 0.980435363 | 0.679937469 |
| M577T81     | 0.679501975 | 0.980422599 | 0.679501975 |
| M994T348    | 0.679198879 | 0.980413526 | 0.679198879 |
| M1139T354_1 | 0.67904323  | 0.980408969 | 0.67904323  |
| M305T290    | 0.678547717 | 0.980394488 | 0.678547717 |
| M275T219    | 0.678495921 | 0.980392995 | 0.678495921 |
| M606T272_2  | 0.678485564 | 0.980392681 | 0.678485564 |
| M418T246    | 0.678387641 | 0.980389838 | 0.678387641 |
| M180T83     | 0.678089859 | 0.980381264 | 0.678089859 |
| M371T211    | 0.678033836 | 0.980379605 | 0.678033836 |
| M684T32     | 0.677648327 | 0.980368832 | 0.677648327 |
| M389T32     | 0.677646106 | 0.98036846  | 0.677646106 |
| M247T278    | 0.677344383 | 0.980359837 | 0.677344383 |
| M227T431    | 0.677124049 | 0.980353567 | 0.677124049 |
| M302T236    | 0.676975287 | 0.980349347 | 0.676975287 |
| M640T350    | 0.6769263   | 0.98034796  | 0.6769263   |
| M433T199    | 0.676862993 | 0.980346169 | 0.676862993 |

|            |             |             |             |
|------------|-------------|-------------|-------------|
| M604T168   | 0.676782811 | 0.980343904 | 0.676782811 |
| M207T304   | 0.676654098 | 0.980340274 | 0.676654098 |
| M515T321   | 0.676318209 | 0.980330838 | 0.676318209 |
| M135T34_2  | 0.676161216 | 0.980326547 | 0.676161216 |
| M89T56     | 0.676131249 | 0.980325611 | 0.676131249 |
| M379T453   | 0.675917849 | 0.980320071 | 0.675917849 |
| M816T433   | 0.675819093 | 0.980316918 | 0.675819093 |
| M256T184   | 0.675577519 | 0.980310226 | 0.675577519 |
| M534T264   | 0.675543767 | 0.980309364 | 0.675543767 |
| M248T272   | 0.67551834  | 0.980308589 | 0.67551834  |
| M376T34    | 0.675404524 | 0.98030545  | 0.675404524 |
| M347T379   | 0.674974073 | 0.980293631 | 0.674974073 |
| M343T200   | 0.67486257  | 0.980290974 | 0.67486257  |
| M943T202   | 0.674382273 | 0.980277532 | 0.674382273 |
| M812T50_1  | 0.674380585 | 0.980277507 | 0.674380585 |
| M479T113   | 0.67434678  | 0.980276572 | 0.67434678  |
| M279T109   | 0.674310481 | 0.980275589 | 0.674310481 |
| M517T204   | 0.674171651 | 0.980272317 | 0.674171651 |
| M144T398   | 0.674033155 | 0.980268115 | 0.674033155 |
| M261T35    | 0.67327133  | 0.980247779 | 0.67327133  |
| M919T352   | 0.672924693 | 0.980238681 | 0.672924693 |
| M244T256   | 0.672787785 | 0.980235027 | 0.672787785 |
| M307T380   | 0.672786685 | 0.980234994 | 0.672786685 |
| M224T62    | 0.672773285 | 0.980234642 | 0.672773285 |
| M330T72    | 0.672528343 | 0.980228748 | 0.672528343 |
| M1022T39_2 | 0.672342217 | 0.980223373 | 0.672342217 |
| M363T390   | 0.672265229 | 0.980221728 | 0.672265229 |
| M631T352   | 0.672035843 | 0.980215421 | 0.672035843 |
| M179T59    | 0.671977622 | 0.98021392  | 0.671977622 |
| M297T346   | 0.671863453 | 0.980210967 | 0.671863453 |
| M113T27_1  | 0.671804449 | 0.980209462 | 0.671804449 |
| M349T216   | 0.671767379 | 0.980208493 | 0.671767379 |
| M308T214   | 0.671754352 | 0.980208157 | 0.671754352 |
| M1189T354  | 0.671689487 | 0.980206561 | 0.671689487 |
| M269T381   | 0.671675301 | 0.980206186 | 0.671675301 |
| M325T117   | 0.67082142  | 0.980184372 | 0.67082142  |
| M261T64    | 0.670803217 | 0.980183911 | 0.670803217 |
| M277T170   | 0.670709804 | 0.980181556 | 0.670709804 |
| M491T33_3  | 0.670655679 | 0.980180192 | 0.670655679 |
| M1099T352  | 0.670445283 | 0.980174909 | 0.670445283 |
| M177T105   | 0.670410575 | 0.980174039 | 0.670410575 |
| M466T124   | 0.670208787 | 0.980168995 | 0.670208787 |

|             |             |             |             |
|-------------|-------------|-------------|-------------|
| M138T380    | 0.670193518 | 0.980168615 | 0.670193518 |
| M172T184    | 0.670187755 | 0.980168472 | 0.670187755 |
| M668T22     | 0.670129158 | 0.980167014 | 0.670129158 |
| M74T366     | 0.670088435 | 0.980165993 | 0.670088435 |
| M301T311    | 0.670077442 | 0.980165725 | 0.670077442 |
| M352T93     | 0.670029474 | 0.980164533 | 0.670029474 |
| M699T214    | 0.669973054 | 0.980163133 | 0.669973054 |
| M370T239    | 0.669943647 | 0.980162498 | 0.669943647 |
| M1017T32    | 0.669607214 | 0.980154089 | 0.669607214 |
| M234T65     | 0.669597273 | 0.980153842 | 0.669597273 |
| M285T378    | 0.669449842 | 0.98015022  | 0.669449842 |
| M226T78     | 0.669447007 | 0.980150149 | 0.669447007 |
| M603T83     | 0.669295861 | 0.980146446 | 0.669295861 |
| M299T367    | 0.669156209 | 0.980143035 | 0.669156209 |
| M441T174    | 0.669003906 | 0.980139326 | 0.669003906 |
| M739T208    | 0.66899685  | 0.980139155 | 0.66899685  |
| M1109T354_1 | 0.668965318 | 0.980138388 | 0.668965318 |
| M805T56     | 0.668934025 | 0.980137628 | 0.668934025 |
| M353T130    | 0.668713944 | 0.980132319 | 0.668713944 |
| M281T34     | 0.668529003 | 0.980127856 | 0.668529003 |
| M116T309    | 0.668236345 | 0.980120821 | 0.668236345 |
| M193T173    | 0.667984309 | 0.980114813 | 0.667984309 |
| M213T85     | 0.667788791 | 0.980110176 | 0.667788791 |
| M610T352    | 0.667777373 | 0.980109909 | 0.667777373 |
| M88T392     | 0.667662255 | 0.980107187 | 0.667662255 |
| M749T112    | 0.66728443  | 0.980098306 | 0.66728443  |
| M141T303    | 0.667283258 | 0.98009828  | 0.667283258 |
| M449T60     | 0.667145949 | 0.980095135 | 0.667145949 |
| M293T255    | 0.667071721 | 0.980094231 | 0.667071721 |
| M940T228    | 0.66705961  | 0.980093209 | 0.66705961  |
| M587T414    | 0.666911366 | 0.980089616 | 0.666911366 |
| M130T363    | 0.666873441 | 0.980088752 | 0.666873441 |
| M837T39     | 0.666688227 | 0.980084456 | 0.666688227 |
| M92T157     | 0.666679082 | 0.980084241 | 0.666679082 |
| M352T130    | 0.666515289 | 0.980080469 | 0.666515289 |
| M217T28     | 0.666483802 | 0.980079745 | 0.666483802 |
| M296T194    | 0.666267482 | 0.980074788 | 0.666267482 |
| M302T252    | 0.666240571 | 0.980074217 | 0.666240571 |
| M678T33_2   | 0.666231117 | 0.980073959 | 0.666231117 |
| M876T171    | 0.666231089 | 0.980073958 | 0.666231089 |
| M495T38     | 0.665916691 | 0.980066806 | 0.665916691 |
| M489T169    | 0.665869058 | 0.980065727 | 0.665869058 |

|           |             |             |             |
|-----------|-------------|-------------|-------------|
| M886T102  | 0.665768739 | 0.98006346  | 0.665768739 |
| M349T28_2 | 0.665717276 | 0.980062297 | 0.665717276 |
| M863T354  | 0.665696933 | 0.980061847 | 0.665696933 |
| M174T48   | 0.665679798 | 0.980061454 | 0.665679798 |
| M1181T39  | 0.66557616  | 0.980094065 | 0.66557616  |
| M750T78   | 0.665543707 | 0.980058393 | 0.665543707 |
| M915T126  | 0.665514027 | 0.980057733 | 0.665514027 |
| M1023T354 | 0.6652443   | 0.980051692 | 0.6652443   |
| M223T257  | 0.665097352 | 0.980048437 | 0.665097352 |
| M201T91   | 0.665090635 | 0.980048276 | 0.665090635 |
| M167T47   | 0.665066517 | 0.98004774  | 0.665066517 |
| M261T330  | 0.664970283 | 0.980045603 | 0.664970283 |
| M153T27   | 0.664832947 | 0.980042566 | 0.664832947 |
| M360T76   | 0.664828447 | 0.980042466 | 0.664828447 |
| M785T131  | 0.664758024 | 0.980040914 | 0.664758024 |
| M501T379  | 0.664582752 | 0.980037062 | 0.664582752 |
| M1161T354 | 0.664389958 | 0.980032842 | 0.664389958 |
| M605T152  | 0.663648053 | 0.980016805 | 0.663648053 |
| M420T179  | 0.663556791 | 0.98001485  | 0.663556791 |
| M625T351  | 0.66349883  | 0.980013612 | 0.66349883  |
| M146T85   | 0.663330545 | 0.980010314 | 0.663330545 |
| M293T464  | 0.663241679 | 0.980008143 | 0.663241679 |
| M388T333  | 0.662872104 | 0.98000035  | 0.662872104 |
| M483T45   | 0.662823029 | 0.979999811 | 0.662823029 |
| M639T373  | 0.662777659 | 0.979998369 | 0.662777659 |
| M404T115  | 0.66262809  | 0.979995245 | 0.66262809  |
| M409T251  | 0.662151628 | 0.979985378 | 0.662151628 |
| M846T66   | 0.662141939 | 0.979985182 | 0.662141939 |
| M295T18   | 0.662029835 | 0.979982883 | 0.662029835 |
| M1111T172 | 0.661867156 | 0.979979546 | 0.661867156 |
| M241T96   | 0.66177088  | 0.97997772  | 0.66177088  |
| M319T239  | 0.661687878 | 0.979975894 | 0.661687878 |
| M1176T260 | 0.66168478  | 0.979975831 | 0.66168478  |
| M281T213  | 0.661682507 | 0.979975785 | 0.661682507 |
| M653T352  | 0.661568434 | 0.979973471 | 0.661568434 |
| M386T334  | 0.660907536 | 0.979960214 | 0.660907536 |
| M208T381  | 0.660752763 | 0.979957143 | 0.660752763 |
| M817T354  | 0.660680822 | 0.979955721 | 0.660680822 |
| M255T262  | 0.660596184 | 0.979954052 | 0.660596184 |
| M788T137  | 0.66054362  | 0.979953017 | 0.66054362  |
| M437T231  | 0.660354432 | 0.979949308 | 0.660354432 |
| M419T261  | 0.660297587 | 0.979948198 | 0.660297587 |

|             |             |             |             |
|-------------|-------------|-------------|-------------|
| M510T253    | 0.660135984 | 0.979945078 | 0.660135984 |
| M764T354    | 0.660134833 | 0.979945037 | 0.660134833 |
| M970T354    | 0.660100884 | 0.979944367 | 0.660100884 |
| M806T157    | 0.660079212 | 0.979943948 | 0.660079212 |
| M591T381    | 0.659786495 | 0.979938295 | 0.659786495 |
| M587T260    | 0.659674092 | 0.979936139 | 0.659674092 |
| M87T374     | 0.659619243 | 0.979935591 | 0.659619243 |
| M353T204    | 0.659204156 | 0.979927194 | 0.659204156 |
| M429T55     | 0.658982903 | 0.97992303  | 0.658982903 |
| M133T374    | 0.658689097 | 0.979917544 | 0.658689097 |
| M74T374     | 0.658679473 | 0.979917363 | 0.658679473 |
| M294T269    | 0.658635694 | 0.979916547 | 0.658635694 |
| M1069T354_2 | 0.658445882 | 0.979913058 | 0.658445882 |
| M641T484    | 0.658429174 | 0.97991273  | 0.658429174 |
| M357T243_2  | 0.658313432 | 0.979910598 | 0.658313432 |
| M440T260    | 0.658150472 | 0.979907611 | 0.658150472 |
| M451T32     | 0.657933914 | 0.979903899 | 0.657933914 |
| M249T38     | 0.657425689 | 0.979894521 | 0.657425689 |
| M291T442    | 0.657240149 | 0.979891225 | 0.657240149 |
| M931T185    | 0.657032416 | 0.979887547 | 0.657032416 |
| M992T176    | 0.657024367 | 0.979887406 | 0.657024367 |
| M126T48     | 0.656945767 | 0.979886052 | 0.656945767 |
| M575T26     | 0.656727322 | 0.979882201 | 0.656727322 |
| M102T386    | 0.65666182  | 0.979881061 | 0.65666182  |
| M304T127    | 0.656608857 | 0.979880157 | 0.656608857 |
| M237T125    | 0.656593412 | 0.979879889 | 0.656593412 |
| M184T377    | 0.656501374 | 0.979878279 | 0.656501374 |
| M813T74     | 0.656493375 | 0.97987814  | 0.656493375 |
| M222T281    | 0.656399925 | 0.979876526 | 0.656399925 |
| M1147T39    | 0.656396235 | 0.979876462 | 0.656396235 |
| M437T352    | 0.655871005 | 0.979867494 | 0.655871005 |
| M154T44     | 0.655731333 | 0.979865139 | 0.655731333 |
| M353T92     | 0.655576041 | 0.979862529 | 0.655576041 |
| M249T79     | 0.655431679 | 0.97986015  | 0.655431679 |
| M237T356    | 0.655339189 | 0.979859142 | 0.655339189 |
| M316T179    | 0.655271833 | 0.979857502 | 0.655271833 |
| M1062T352   | 0.655214327 | 0.979856513 | 0.655214327 |
| M195T181_2  | 0.655202112 | 0.979856314 | 0.655202112 |
| M351T397    | 0.654830106 | 0.979850211 | 0.654830106 |
| M823T70     | 0.654775982 | 0.979849343 | 0.654775982 |
| M728T26_1   | 0.65477235  | 0.979849271 | 0.65477235  |
| M255T343    | 0.654747693 | 0.979848869 | 0.654747693 |

|             |             |             |             |
|-------------|-------------|-------------|-------------|
| M187T381    | 0.654708347 | 0.979848389 | 0.654708347 |
| M496T130    | 0.654660722 | 0.979847459 | 0.654660722 |
| M177T464    | 0.65456324  | 0.97984589  | 0.65456324  |
| M482T115    | 0.654554001 | 0.979845847 | 0.654554001 |
| M812T202    | 0.654480663 | 0.979844575 | 0.654480663 |
| M289T467    | 0.654384301 | 0.979843008 | 0.654384301 |
| M413T184    | 0.653650466 | 0.97983142  | 0.653650466 |
| M559T34     | 0.653297574 | 0.979825965 | 0.653297574 |
| M565T213    | 0.652979073 | 0.979821134 | 0.652979073 |
| M505T290    | 0.652654691 | 0.979816231 | 0.652654691 |
| M790T52     | 0.652487503 | 0.979813736 | 0.652487503 |
| M659T212    | 0.652389501 | 0.979812285 | 0.652389501 |
| M304T183    | 0.652333986 | 0.979811465 | 0.652333986 |
| M652T352    | 0.652291078 | 0.979811015 | 0.652291078 |
| M118T205    | 0.652049278 | 0.97980729  | 0.652049278 |
| M1129T352_1 | 0.652011639 | 0.979806742 | 0.652011639 |
| M439T393    | 0.651709675 | 0.979802379 | 0.651709675 |
| M155T380    | 0.651606534 | 0.979800901 | 0.651606534 |
| M438T169    | 0.651584807 | 0.97980059  | 0.651584807 |
| M455T305    | 0.651577733 | 0.97980049  | 0.651577733 |
| M361T388    | 0.651345319 | 0.979797188 | 0.651345319 |
| M70T309     | 0.651279442 | 0.97979626  | 0.651279442 |
| M265T111    | 0.651267926 | 0.979796098 | 0.651267926 |
| M370T252    | 0.651157586 | 0.97979455  | 0.651157586 |
| M686T193    | 0.651103105 | 0.979793785 | 0.651103105 |
| M551T234    | 0.651077027 | 0.979793422 | 0.651077027 |
| M562T40     | 0.650879132 | 0.97979087  | 0.650879132 |
| M149T315    | 0.650620981 | 0.979787121 | 0.650620981 |
| M827T106    | 0.650618581 | 0.979787246 | 0.650618581 |
| M339T82     | 0.650403338 | 0.97978429  | 0.650403338 |
| M450T26_1   | 0.650307232 | 0.979782864 | 0.650307232 |
| M924T34     | 0.650190951 | 0.979781302 | 0.650190951 |
| M817T148_2  | 0.650149813 | 0.979780751 | 0.650149813 |
| M357T113    | 0.649999991 | 0.97977876  | 0.649999991 |
| M785T352_2  | 0.649979883 | 0.979778723 | 0.649979883 |
| M491T273    | 0.64981277  | 0.979776282 | 0.64981277  |
| M291T264    | 0.649794793 | 0.979776046 | 0.649794793 |
| M367T150    | 0.649581622 | 0.979773262 | 0.649581622 |
| M242T256    | 0.649549368 | 0.979772839 | 0.649549368 |
| M406T297    | 0.649385269 | 0.979770718 | 0.649385269 |
| M497T51     | 0.649362967 | 0.979770457 | 0.649362967 |
| M310T34     | 0.649358096 | 0.979770739 | 0.649358096 |

|            |             |             |             |
|------------|-------------|-------------|-------------|
| M190T36    | 0.649323671 | 0.979769926 | 0.649323671 |
| M845T56    | 0.649143696 | 0.979767627 | 0.649143696 |
| M163T320   | 0.648989627 | 0.979765674 | 0.648989627 |
| M308T377   | 0.648985883 | 0.979765627 | 0.648985883 |
| M891T52    | 0.648860337 | 0.979764056 | 0.648860337 |
| M110T159   | 0.648726052 | 0.979762369 | 0.648726052 |
| M691T57    | 0.648651181 | 0.979761459 | 0.648651181 |
| M119T462   | 0.64854019  | 0.979760066 | 0.64854019  |
| M553T33    | 0.648446535 | 0.979758912 | 0.648446535 |
| M689T414_2 | 0.648409659 | 0.979758462 | 0.648409659 |
| M162T337   | 0.648409598 | 0.979758465 | 0.648409598 |
| M914T354_2 | 0.648341741 | 0.979757633 | 0.648341741 |
| M897T93    | 0.648299193 | 0.979757113 | 0.648299193 |
| M366T217_2 | 0.648250537 | 0.979756522 | 0.648250537 |
| M766T81_1  | 0.648247628 | 0.979756498 | 0.648247628 |
| M263T32    | 0.64820826  | 0.979756039 | 0.64820826  |
| M124T206   | 0.648166422 | 0.979755504 | 0.648166422 |
| M486T37    | 0.648038824 | 0.979753966 | 0.648038824 |
| M843T89    | 0.647939057 | 0.979752773 | 0.647939057 |
| M195T408   | 0.647853841 | 0.979751757 | 0.647853841 |
| M573T191   | 0.647683854 | 0.979749747 | 0.647683854 |
| M390T272   | 0.647439611 | 0.979746938 | 0.647439611 |
| M315T360   | 0.64735968  | 0.979745978 | 0.64735968  |
| M647T356   | 0.647274715 | 0.979745002 | 0.647274715 |
| M331T183   | 0.647136069 | 0.979743397 | 0.647136069 |
| M267T33    | 0.647024647 | 0.979742127 | 0.647024647 |
| M1151T39   | 0.646833219 | 0.979739972 | 0.646833219 |
| M567T354   | 0.64675897  | 0.979739141 | 0.64675897  |
| M260T281   | 0.646722427 | 0.979738734 | 0.646722427 |
| M195T354   | 0.64654547  | 0.979736773 | 0.64654547  |
| M141T98    | 0.646458705 | 0.979735832 | 0.646458705 |
| M453T378   | 0.646458417 | 0.979735847 | 0.646458417 |
| M791T70    | 0.646355259 | 0.979734689 | 0.646355259 |
| M255T26_2  | 0.645936215 | 0.979730434 | 0.645936215 |
| M447T34    | 0.645882943 | 0.97972962  | 0.645882943 |
| M253T129   | 0.645728395 | 0.979727993 | 0.645728395 |
| M468T345   | 0.645348634 | 0.979724064 | 0.645348634 |
| M815T129   | 0.645023115 | 0.979720773 | 0.645023115 |
| M181T38    | 0.644724161 | 0.979717813 | 0.644724161 |
| M772T54    | 0.643895936 | 0.979709932 | 0.643895936 |
| M765T81_2  | 0.643749035 | 0.979708586 | 0.643749035 |
| M841T38    | 0.643633229 | 0.97970753  | 0.643633229 |

|             |             |             |             |
|-------------|-------------|-------------|-------------|
| M321T103    | 0.643595752 | 0.979707191 | 0.643595752 |
| M957T353    | 0.64347975  | 0.97970615  | 0.64347975  |
| M293T117    | 0.643332291 | 0.979704836 | 0.643332291 |
| M373T422    | 0.643074201 | 0.979702602 | 0.643074201 |
| M356T35_1   | 0.642982196 | 0.979701779 | 0.642982196 |
| M722T203    | 0.64282842  | 0.979700465 | 0.64282842  |
| M171T51     | 0.642759719 | 0.979700073 | 0.642759719 |
| M828T353    | 0.642604254 | 0.979698576 | 0.642604254 |
| M1120T38    | 0.642601949 | 0.979698558 | 0.642601949 |
| M507T160    | 0.642526888 | 0.979698213 | 0.642526888 |
| M1063T354   | 0.642286124 | 0.979696061 | 0.642286124 |
| M927T102    | 0.64222882  | 0.979695492 | 0.64222882  |
| M513T348    | 0.64213954  | 0.979694873 | 0.64213954  |
| M807T352    | 0.642050525 | 0.979694023 | 0.642050525 |
| M564T212    | 0.641894776 | 0.97969283  | 0.641894776 |
| M178T204    | 0.641838702 | 0.979692416 | 0.641838702 |
| M1162T354   | 0.641673901 | 0.979691113 | 0.641673901 |
| M375T155    | 0.641670981 | 0.979691091 | 0.641670981 |
| M678T500    | 0.641569713 | 0.979690315 | 0.641569713 |
| M515T92     | 0.641534091 | 0.979690044 | 0.641534091 |
| M1181T465_1 | 0.641496216 | 0.979689757 | 0.641496216 |
| M567T272    | 0.64128121  | 0.979688144 | 0.64128121  |
| M127T205    | 0.640717856 | 0.979684074 | 0.640717856 |
| M145T320    | 0.640680628 | 0.979683813 | 0.640680628 |
| M151T37     | 0.64064314  | 0.979683551 | 0.64064314  |
| M880T55     | 0.640632693 | 0.979683492 | 0.640632693 |
| M399T243    | 0.640551306 | 0.979682954 | 0.640551306 |
| M379T129    | 0.640458127 | 0.979682457 | 0.640458127 |
| M192T19     | 0.640285122 | 0.979681103 | 0.640285122 |
| M173T17     | 0.640227985 | 0.9796807   | 0.640227985 |
| M207T59     | 0.640196188 | 0.979680507 | 0.640196188 |
| M445T170    | 0.640051067 | 0.979679546 | 0.640051067 |
| M309T136    | 0.640047365 | 0.979679522 | 0.640047365 |
| M452T115    | 0.639498389 | 0.979676053 | 0.639498389 |
| M666T36     | 0.639254063 | 0.979674756 | 0.639254063 |
| M293T381    | 0.639171323 | 0.97967406  | 0.639171323 |
| M331T380    | 0.638870413 | 0.979672318 | 0.638870413 |
| M277T353    | 0.638740416 | 0.979671572 | 0.638740416 |
| M217T34     | 0.638712284 | 0.979671415 | 0.638712284 |
| M117T413    | 0.638350487 | 0.979669439 | 0.638350487 |
| M294T254    | 0.63822685  | 0.979668784 | 0.63822685  |
| M581T306    | 0.638131809 | 0.979668289 | 0.638131809 |

|            |             |             |             |
|------------|-------------|-------------|-------------|
| M307T293   | 0.637894798 | 0.979667085 | 0.637894798 |
| M439T122   | 0.637797894 | 0.979666605 | 0.637797894 |
| M206T185   | 0.637781757 | 0.979666561 | 0.637781757 |
| M187T328   | 0.637581993 | 0.979665572 | 0.637581993 |
| M1050T100  | 0.636870175 | 0.979662345 | 0.636870175 |
| M329T100   | 0.636767016 | 0.97966193  | 0.636767016 |
| M595T36    | 0.636735088 | 0.979661799 | 0.636735088 |
| M584T33    | 0.636237429 | 0.979659807 | 0.636237429 |
| M215T289   | 0.636175767 | 0.9796596   | 0.636175767 |
| M375T234   | 0.635948784 | 0.979658741 | 0.635948784 |
| M1032T171  | 0.635789006 | 0.979658181 | 0.635789006 |
| M171T375   | 0.635783108 | 0.97965816  | 0.635783108 |
| M379T422   | 0.635595229 | 0.979657527 | 0.635595229 |
| M818T147_2 | 0.635562019 | 0.979657417 | 0.635562019 |
| M229T192   | 0.63553423  | 0.979657326 | 0.63553423  |
| M452T130   | 0.635304719 | 0.979656598 | 0.635304719 |
| M1113T36   | 0.635192897 | 0.979656257 | 0.635192897 |
| M684T29    | 0.634971552 | 0.979655611 | 0.634971552 |
| M480T143   | 0.634929577 | 0.979655492 | 0.634929577 |
| M369T239   | 0.63491609  | 0.979655458 | 0.63491609  |
| M497T91    | 0.634891658 | 0.979655386 | 0.634891658 |
| M368T44    | 0.634853699 | 0.979655287 | 0.634853699 |
| M365T436   | 0.634736979 | 0.979654965 | 0.634736979 |
| M337T33    | 0.634713527 | 0.979654941 | 0.634713527 |
| M317T308   | 0.634269713 | 0.979653836 | 0.634269713 |
| M298T109   | 0.633839123 | 0.97965321  | 0.633839123 |
| M331T408   | 0.633798825 | 0.979652802 | 0.633798825 |
| M996T115   | 0.633761674 | 0.979652785 | 0.633761674 |
| M404T205   | 0.633732791 | 0.979652682 | 0.633732791 |
| M460T26    | 0.633630464 | 0.979652484 | 0.633630464 |
| M71T108    | 0.633594603 | 0.979652419 | 0.633594603 |
| M308T120   | 0.633204378 | 0.979651777 | 0.633204378 |
| M211T351   | 0.633167234 | 0.979651723 | 0.633167234 |
| M151T143   | 0.633107617 | 0.979651635 | 0.633107617 |
| M306T517   | 0.632967868 | 0.979651445 | 0.632967868 |
| M469T202   | 0.632922944 | 0.979651386 | 0.632922944 |
| M467T169   | 0.632821557 | 0.97965126  | 0.632821557 |
| M363T96    | 0.632814185 | 0.979651251 | 0.632814185 |
| M351T345   | 0.632776839 | 0.9796529   | 0.632776839 |
| M739T239   | 0.632756061 | 0.979651677 | 0.632756061 |
| M223T263   | 0.632738755 | 0.979651163 | 0.632738755 |
| M421T171   | 0.632551919 | 0.979650972 | 0.632551919 |

|             |             |             |             |
|-------------|-------------|-------------|-------------|
| M545T116    | 0.632506773 | 0.979650919 | 0.632506773 |
| M114T374    | 0.632296851 | 0.979650748 | 0.632296851 |
| M689T414_1  | 0.631997675 | 0.979650545 | 0.631997675 |
| M507T321    | 0.631601923 | 0.979650366 | 0.631601923 |
| M217T278    | 0.631263738 | 0.979650323 | 0.631263738 |
| M961T354_1  | 0.630699005 | 0.979650494 | 0.630699005 |
| M134T204    | 0.630082546 | 0.979651223 | 0.630082546 |
| M264T311    | 0.630054098 | 0.979651201 | 0.630054098 |
| M540T98     | 0.629989504 | 0.979650967 | 0.629989504 |
| M529T304    | 0.629744721 | 0.979651281 | 0.629744721 |
| M463T379    | 0.629672304 | 0.979651342 | 0.629672304 |
| M343T252    | 0.629419595 | 0.979651673 | 0.629419595 |
| M180T36     | 0.629415907 | 0.979651693 | 0.629415907 |
| M250T35     | 0.62938067  | 0.979652177 | 0.62938067  |
| M229T557    | 0.629224203 | 0.979651991 | 0.629224203 |
| M775T156    | 0.629072847 | 0.979652226 | 0.629072847 |
| M856T352    | 0.628919335 | 0.979652502 | 0.628919335 |
| M816T38     | 0.62854096  | 0.979653264 | 0.62854096  |
| M620T354    | 0.628282849 | 0.97965385  | 0.628282849 |
| M150T380    | 0.628195956 | 0.979654076 | 0.628195956 |
| M393T258    | 0.62819587  | 0.979654061 | 0.62819587  |
| M1077T318_2 | 0.628156152 | 0.979654158 | 0.628156152 |
| M247T269    | 0.628138783 | 0.979654201 | 0.628138783 |
| M116T392    | 0.628131453 | 0.979654226 | 0.628131453 |
| M114T310    | 0.628116715 | 0.979654256 | 0.628116715 |
| M813T354    | 0.628100753 | 0.979654328 | 0.628100753 |
| M315T229    | 0.627967443 | 0.979654639 | 0.627967443 |
| M1101T340_3 | 0.627921076 | 0.979654762 | 0.627921076 |
| M191T200    | 0.627886104 | 0.979654876 | 0.627886104 |
| M364T110    | 0.62760839  | 0.979655644 | 0.62760839  |
| M390T382    | 0.627585783 | 0.97965577  | 0.627585783 |
| M677T177    | 0.627517838 | 0.979655905 | 0.627517838 |
| M686T37     | 0.627359689 | 0.979656389 | 0.627359689 |
| M366T240    | 0.627311536 | 0.979656547 | 0.627311536 |
| M502T108    | 0.627303302 | 0.979656564 | 0.627303302 |
| M369T492    | 0.627276464 | 0.979656651 | 0.627276464 |
| M1097T34_2  | 0.627251065 | 0.979656732 | 0.627251065 |
| M479T309    | 0.62691321  | 0.979657864 | 0.62691321  |
| M747T256    | 0.626891068 | 0.979658046 | 0.626891068 |
| M1155T34    | 0.626692796 | 0.979658654 | 0.626692796 |
| M365T230    | 0.626609548 | 0.979658962 | 0.626609548 |
| M589T358    | 0.626596216 | 0.979659043 | 0.626596216 |

|           |             |             |             |
|-----------|-------------|-------------|-------------|
| M339T308  | 0.626452287 | 0.979659559 | 0.626452287 |
| M293T408  | 0.626375121 | 0.979659861 | 0.626375121 |
| M231T409  | 0.626372018 | 0.979659875 | 0.626372018 |
| M207T280  | 0.626091148 | 0.979661045 | 0.626091148 |
| M457T285  | 0.625951168 | 0.979661631 | 0.625951168 |
| M1160T59  | 0.625917088 | 0.979661761 | 0.625917088 |
| M697T200  | 0.625406892 | 0.979664071 | 0.625406892 |
| M245T297  | 0.625185993 | 0.979665121 | 0.625185993 |
| M321T363  | 0.625015535 | 0.979665971 | 0.625015535 |
| M801T452  | 0.624823815 | 0.979666968 | 0.624823815 |
| M351T256  | 0.62469517  | 0.979667637 | 0.62469517  |
| M674T34_1 | 0.624343964 | 0.979669562 | 0.624343964 |
| M87T116   | 0.624326706 | 0.979669656 | 0.624326706 |
| M707T241  | 0.624113517 | 0.979670887 | 0.624113517 |
| M240T233  | 0.624002064 | 0.97967157  | 0.624002064 |
| M167T59   | 0.62383053  | 0.979672559 | 0.62383053  |
| M890T292  | 0.623818727 | 0.979672631 | 0.623818727 |
| M1111T354 | 0.623772813 | 0.97967291  | 0.623772813 |
| M742T200  | 0.623645581 | 0.979673708 | 0.623645581 |
| M643T35   | 0.623412076 | 0.979675185 | 0.623412076 |
| M337T587  | 0.623275937 | 0.97967605  | 0.623275937 |
| M149T31   | 0.623173696 | 0.979676723 | 0.623173696 |
| M1064T354 | 0.623029705 | 0.979677688 | 0.623029705 |
| M893T352  | 0.62263675  | 0.979680398 | 0.62263675  |
| M193T381  | 0.622434765 | 0.979681847 | 0.622434765 |
| M766T81_2 | 0.622424311 | 0.97968194  | 0.622424311 |
| M501T129  | 0.622163851 | 0.979683843 | 0.622163851 |
| M725T146  | 0.622102325 | 0.979684305 | 0.622102325 |
| M332T354  | 0.622080767 | 0.979684468 | 0.622080767 |
| M227T106  | 0.621883107 | 0.97968599  | 0.621883107 |
| M75T171   | 0.621876342 | 0.979686175 | 0.621876342 |
| M331T124  | 0.621791121 | 0.979686694 | 0.621791121 |
| M882T352  | 0.621699569 | 0.979687674 | 0.621699569 |
| M423T99   | 0.621539912 | 0.979688682 | 0.621539912 |
| M263T303  | 0.621221273 | 0.979691284 | 0.621221273 |
| M901T54   | 0.621112866 | 0.979692189 | 0.621112866 |
| M439T36   | 0.621032059 | 0.979692872 | 0.621032059 |
| M261T77   | 0.620832753 | 0.979694577 | 0.620832753 |
| M208T108  | 0.620751011 | 0.979695285 | 0.620751011 |
| M344T86   | 0.620750833 | 0.979695289 | 0.620750833 |
| M485T303  | 0.620446841 | 0.979698254 | 0.620446841 |
| M460T85   | 0.620426864 | 0.97969818  | 0.620426864 |

|             |             |             |             |
|-------------|-------------|-------------|-------------|
| M765T171    | 0.620412803 | 0.979698306 | 0.620412803 |
| M933T25     | 0.620318833 | 0.979699135 | 0.620318833 |
| M136T380    | 0.619764933 | 0.979705411 | 0.619764933 |
| M927T168    | 0.619764893 | 0.979704316 | 0.619764893 |
| M779T111    | 0.619435853 | 0.97970751  | 0.619435853 |
| M159T258    | 0.619345102 | 0.979708441 | 0.619345102 |
| M267T259    | 0.61932269  | 0.97970864  | 0.61932269  |
| M1113T171   | 0.619288935 | 0.979708973 | 0.619288935 |
| M356T243    | 0.619159385 | 0.979710289 | 0.619159385 |
| M776T112    | 0.618641027 | 0.979715656 | 0.618641027 |
| M673T354    | 0.618623131 | 0.979715837 | 0.618623131 |
| M96T59      | 0.618560928 | 0.979716493 | 0.618560928 |
| M236T27     | 0.618544849 | 0.979716685 | 0.618544849 |
| M680T293    | 0.618144763 | 0.979711606 | 0.618144763 |
| M594T292_1  | 0.618081439 | 0.97972171  | 0.618081439 |
| M237T182    | 0.617153457 | 0.979732391 | 0.617153457 |
| M461T129    | 0.616965499 | 0.979734657 | 0.616965499 |
| M1113T339_2 | 0.616835147 | 0.979736265 | 0.616835147 |
| M111T33     | 0.616768431 | 0.979737062 | 0.616768431 |
| M1129T352_2 | 0.616517426 | 0.979740167 | 0.616517426 |
| M330T39     | 0.615854369 | 0.979738825 | 0.615854369 |
| M142T272    | 0.615745657 | 0.979750103 | 0.615745657 |
| M1179T39    | 0.615590763 | 0.979752162 | 0.615590763 |
| M388T183    | 0.615581416 | 0.979752293 | 0.615581416 |
| M355T236    | 0.61556676  | 0.979752488 | 0.61556676  |
| M301T114    | 0.615360928 | 0.979755261 | 0.615360928 |
| M150T167    | 0.615163865 | 0.979757956 | 0.615163865 |
| M247T259    | 0.615090077 | 0.979758976 | 0.615090077 |
| M374T310    | 0.614978866 | 0.97976052  | 0.614978866 |
| M273T135    | 0.614922642 | 0.979761305 | 0.614922642 |
| M93T320     | 0.614777553 | 0.979763481 | 0.614777553 |
| M739T77     | 0.614687051 | 0.979764628 | 0.614687051 |
| M490T34_2   | 0.614577474 | 0.979766192 | 0.614577474 |
| M402T230    | 0.614401148 | 0.979768734 | 0.614401148 |
| M255T272    | 0.614199032 | 0.979771679 | 0.614199032 |
| M902T352    | 0.614148787 | 0.979772417 | 0.614148787 |
| M1182T465_1 | 0.613986988 | 0.979774812 | 0.613986988 |
| M122T207    | 0.613822903 | 0.97977728  | 0.613822903 |
| M247T389    | 0.613821518 | 0.979777286 | 0.613821518 |
| M248T116    | 0.613759071 | 0.979778249 | 0.613759071 |
| M245T157    | 0.613715789 | 0.97977888  | 0.613715789 |
| M1051T168   | 0.61328729  | 0.979785455 | 0.61328729  |

|            |             |             |             |
|------------|-------------|-------------|-------------|
| M345T251   | 0.61325691  | 0.979785924 | 0.61325691  |
| M303T51    | 0.613239643 | 0.979786192 | 0.613239643 |
| M360T116_1 | 0.613118006 | 0.9798004   | 0.613118006 |
| M666T416   | 0.612970946 | 0.979790424 | 0.612970946 |
| M476T199   | 0.612877394 | 0.979791902 | 0.612877394 |
| M521T155   | 0.612609887 | 0.979796315 | 0.612609887 |
| M287T378   | 0.612305372 | 0.97980121  | 0.612305372 |
| M676T156   | 0.612248838 | 0.979802107 | 0.612248838 |
| M306T91    | 0.61217264  | 0.979803369 | 0.61217264  |
| M679T32_1  | 0.612152542 | 0.979803702 | 0.612152542 |
| M338T34    | 0.611950847 | 0.979807103 | 0.611950847 |
| M274T169   | 0.611933697 | 0.979807364 | 0.611933697 |
| M746T32    | 0.611926425 | 0.979807487 | 0.611926425 |
| M413T408   | 0.611465168 | 0.979815359 | 0.611465168 |
| M614T236   | 0.611351845 | 0.979817331 | 0.611351845 |
| M489T32    | 0.610964719 | 0.979824143 | 0.610964719 |
| M805T353   | 0.610901088 | 0.979825347 | 0.610901088 |
| M151T242   | 0.610814665 | 0.979827019 | 0.610814665 |
| M404T333   | 0.610679809 | 0.979829243 | 0.610679809 |
| M337T319   | 0.610385452 | 0.979825044 | 0.610385452 |
| M329T104   | 0.610376539 | 0.979834766 | 0.610376539 |
| M373T42    | 0.61021513  | 0.97983775  | 0.61021513  |
| M821T47    | 0.610177873 | 0.979838435 | 0.610177873 |
| M157T53_1  | 0.609963201 | 0.979842438 | 0.609963201 |
| M486T154   | 0.609646057 | 0.97984844  | 0.609646057 |
| M812T50_2  | 0.609382271 | 0.979853508 | 0.609382271 |
| M159T343   | 0.609019683 | 0.979860592 | 0.609019683 |
| M234T357   | 0.608810539 | 0.979864731 | 0.608810539 |
| M246T274   | 0.608800922 | 0.979864922 | 0.608800922 |
| M222T60    | 0.608785889 | 0.979865222 | 0.608785889 |
| M163T258   | 0.608774556 | 0.979865448 | 0.608774556 |
| M955T97    | 0.608721203 | 0.979866543 | 0.608721203 |
| M190T327   | 0.608683087 | 0.979867305 | 0.608683087 |
| M112T299   | 0.608669602 | 0.979867577 | 0.608669602 |
| M765T354   | 0.608662267 | 0.97986791  | 0.608662267 |
| M389T380   | 0.608614848 | 0.979868646 | 0.608614848 |
| M342T163   | 0.608558497 | 0.979869788 | 0.608558497 |
| M543T37    | 0.608408487 | 0.979872818 | 0.608408487 |
| M313T292   | 0.608178813 | 0.979877516 | 0.608178813 |
| M603T188   | 0.607856818 | 0.979884189 | 0.607856818 |
| M547T320   | 0.607790006 | 0.979885577 | 0.607790006 |
| M351T120   | 0.607724859 | 0.979886944 | 0.607724859 |

|             |             |             |             |
|-------------|-------------|-------------|-------------|
| M507T381    | 0.607553099 | 0.979890568 | 0.607553099 |
| M847T66     | 0.607469678 | 0.979892338 | 0.607469678 |
| M688T414    | 0.607209172 | 0.979897913 | 0.607209172 |
| M321T274    | 0.607132985 | 0.979899562 | 0.607132985 |
| M766T138    | 0.606613889 | 0.979910912 | 0.606613889 |
| M155T352    | 0.606561794 | 0.979912068 | 0.606561794 |
| M222T204    | 0.606544452 | 0.979912459 | 0.606544452 |
| M475T388    | 0.606543193 | 0.979912495 | 0.606543193 |
| M675T144    | 0.606512275 | 0.979913169 | 0.606512275 |
| M384T215    | 0.606498729 | 0.979913471 | 0.606498729 |
| M520T205    | 0.606443909 | 0.979914692 | 0.606443909 |
| M839T52     | 0.606423274 | 0.979915151 | 0.606423274 |
| M473T378    | 0.606421715 | 0.979915186 | 0.606421715 |
| M513T335    | 0.606272333 | 0.979918534 | 0.606272333 |
| M322T260    | 0.606222396 | 0.979919669 | 0.606222396 |
| M905T112    | 0.606183716 | 0.979920532 | 0.606183716 |
| M505T351    | 0.606071899 | 0.979923397 | 0.606071899 |
| M337T39     | 0.605952216 | 0.979925865 | 0.605952216 |
| M439T168_2  | 0.605883461 | 0.979927365 | 0.605883461 |
| M341T435    | 0.60577152  | 0.979929966 | 0.60577152  |
| M282T237    | 0.605522103 | 0.97993571  | 0.605522103 |
| M191T370    | 0.605496311 | 0.979936302 | 0.605496311 |
| M400T245    | 0.605443675 | 0.97993753  | 0.605443675 |
| M593T292    | 0.605003974 | 0.979947899 | 0.605003974 |
| M1181T465_4 | 0.604963007 | 0.97994888  | 0.604963007 |
| M288T274    | 0.604819673 | 0.979952323 | 0.604819673 |
| M209T78     | 0.604789645 | 0.979953026 | 0.604789645 |
| M387T381    | 0.604619315 | 0.979957136 | 0.604619315 |
| M153T123    | 0.604546115 | 0.979958913 | 0.604546115 |
| M114T341    | 0.604319182 | 0.979964451 | 0.604319182 |
| M325T61     | 0.604259138 | 0.979965944 | 0.604259138 |
| M1109T354_2 | 0.603628245 | 0.979981653 | 0.603628245 |
| M669T353    | 0.603601498 | 0.979982329 | 0.603601498 |
| M489T55     | 0.603395354 | 0.979987567 | 0.603395354 |
| M347T48     | 0.603286335 | 0.979990352 | 0.603286335 |
| M534T198    | 0.603157415 | 0.979993869 | 0.603157415 |
| M843T67     | 0.60307346  | 0.979995835 | 0.60307346  |
| M610T463    | 0.602511289 | 0.980010494 | 0.602511289 |
| M986T167    | 0.602490592 | 0.980011085 | 0.602490592 |
| M343T437    | 0.602391698 | 0.980013709 | 0.602391698 |
| M135T333    | 0.602262622 | 0.980017569 | 0.602262622 |
| M459T194    | 0.602213881 | 0.980018452 | 0.602213881 |

|            |             |             |             |
|------------|-------------|-------------|-------------|
| M217T246   | 0.602187282 | 0.980019164 | 0.602187282 |
| M138T192   | 0.602106448 | 0.980022544 | 0.602106448 |
| M216T48    | 0.601936562 | 0.980025905 | 0.601936562 |
| M292T255   | 0.601788779 | 0.980029934 | 0.601788779 |
| M667T354   | 0.601444203 | 0.980039381 | 0.601444203 |
| M407T351   | 0.601293272 | 0.980043634 | 0.601293272 |
| M401T57    | 0.601227276 | 0.980045398 | 0.601227276 |
| M677T164   | 0.600989072 | 0.980052096 | 0.600989072 |
| M349T87    | 0.60090739  | 0.980054731 | 0.60090739  |
| M371T261   | 0.600880863 | 0.98005511  | 0.600880863 |
| M806T352_1 | 0.600804477 | 0.980057241 | 0.600804477 |
| M455T443   | 0.600627569 | 0.980062295 | 0.600627569 |
| M868T186   | 0.600310593 | 0.980071959 | 0.600310593 |
| M504T262   | 0.600265159 | 0.9800727   | 0.600265159 |
| M778T33_1  | 0.599976293 | 0.980081092 | 0.599976293 |
| M357T440   | 0.599920041 | 0.980082937 | 0.599920041 |
| M829T155   | 0.599914851 | 0.980082892 | 0.599914851 |
| M623T32    | 0.599463146 | 0.980096246 | 0.599463146 |
| M420T370   | 0.599347892 | 0.980099679 | 0.599347892 |
| M531T230   | 0.599332214 | 0.980100151 | 0.599332214 |
| M721T35    | 0.599276156 | 0.98010267  | 0.599276156 |
| M961T159   | 0.599212674 | 0.980103736 | 0.599212674 |
| M983T172   | 0.599057509 | 0.980108416 | 0.599057509 |
| M346T408   | 0.599048714 | 0.980109112 | 0.599048714 |
| M482T259   | 0.598997912 | 0.980110503 | 0.598997912 |
| M413T257   | 0.598769401 | 0.98011728  | 0.598769401 |
| M193T181   | 0.597668858 | 0.980151558 | 0.597668858 |
| M701T265   | 0.597668137 | 0.980151528 | 0.597668137 |
| M256T111   | 0.597544934 | 0.980155458 | 0.597544934 |
| M390T36    | 0.597519316 | 0.980156313 | 0.597519316 |
| M348T116   | 0.597277758 | 0.98016405  | 0.597277758 |
| M931T161   | 0.597000523 | 0.980173026 | 0.597000523 |
| M213T362   | 0.596960802 | 0.980174322 | 0.596960802 |
| M261T225   | 0.596772268 | 0.980180493 | 0.596772268 |
| M202T278   | 0.596656214 | 0.980184313 | 0.596656214 |
| M329T280   | 0.596532897 | 0.980188387 | 0.596532897 |
| M534T112   | 0.596451775 | 0.980191115 | 0.596451775 |
| M362T104   | 0.596416957 | 0.980192306 | 0.596416957 |
| M456T35    | 0.596376304 | 0.980193586 | 0.596376304 |
| M965T259   | 0.596328479 | 0.980195181 | 0.596328479 |
| M225T47    | 0.596259936 | 0.980197469 | 0.596259936 |
| M130T135   | 0.596087833 | 0.980203242 | 0.596087833 |

|            |             |             |             |
|------------|-------------|-------------|-------------|
| M716T170   | 0.595894406 | 0.980209777 | 0.595894406 |
| M349T292   | 0.595729857 | 0.980215355 | 0.595729857 |
| M375T98    | 0.595523286 | 0.980222415 | 0.595523286 |
| M109T34    | 0.595491499 | 0.980223546 | 0.595491499 |
| M97T408_2  | 0.594904869 | 0.980243842 | 0.594904869 |
| M367T251   | 0.594901442 | 0.980243966 | 0.594901442 |
| M131T374   | 0.594669371 | 0.98025212  | 0.594669371 |
| M649T320   | 0.594353245 | 0.980263931 | 0.594353245 |
| M397T56    | 0.594342391 | 0.980263722 | 0.594342391 |
| M315T181_2 | 0.594266196 | 0.980266442 | 0.594266196 |
| M407T246   | 0.594225479 | 0.980267901 | 0.594225479 |
| M333T314   | 0.593928982 | 0.980278573 | 0.593928982 |
| M113T374   | 0.593543083 | 0.980292619 | 0.593543083 |
| M696T352   | 0.593403204 | 0.980297758 | 0.593403204 |
| M579T170   | 0.593364821 | 0.980299167 | 0.593364821 |
| M979T160   | 0.593299307 | 0.980301623 | 0.593299307 |
| M225T230   | 0.593165185 | 0.980306544 | 0.593165185 |
| M425T239_2 | 0.592932281 | 0.980315254 | 0.592932281 |
| M480T409   | 0.592925417 | 0.980315501 | 0.592925417 |
| M600T239   | 0.592865556 | 0.980320776 | 0.592865556 |
| M179T169   | 0.592626706 | 0.980326686 | 0.592626706 |
| M241T277   | 0.592535875 | 0.980330117 | 0.592535875 |
| M986T352   | 0.592317666 | 0.980338449 | 0.592317666 |
| M221T55    | 0.591974161 | 0.980351562 | 0.591974161 |
| M379T255   | 0.591922441 | 0.980353555 | 0.591922441 |
| M357T243_1 | 0.591811284 | 0.980357852 | 0.591811284 |
| M231T32    | 0.591713799 | 0.98036163  | 0.591713799 |
| M116T299   | 0.591684677 | 0.980362765 | 0.591684677 |
| M393T162   | 0.591655274 | 0.980363908 | 0.591655274 |
| M292T396   | 0.591292833 | 0.980378088 | 0.591292833 |
| M441T205   | 0.591191442 | 0.980382082 | 0.591191442 |
| M382T53    | 0.591176976 | 0.980382777 | 0.591176976 |
| M398T58    | 0.590905197 | 0.980393434 | 0.590905197 |
| M496T107   | 0.5907846   | 0.980398246 | 0.5907846   |
| M860T49    | 0.590610077 | 0.980405242 | 0.590610077 |
| M80T408    | 0.590433003 | 0.980412423 | 0.590433003 |
| M317T431   | 0.589589857 | 0.980446959 | 0.589589857 |
| M742T171   | 0.589575324 | 0.980447493 | 0.589575324 |
| M412T379   | 0.589289065 | 0.980459419 | 0.589289065 |
| M263T34_2  | 0.589249805 | 0.980461064 | 0.589249805 |
| M666T300   | 0.58902971  | 0.980470315 | 0.58902971  |
| M373T395   | 0.588654488 | 0.98048682  | 0.588654488 |

|            |             |             |             |
|------------|-------------|-------------|-------------|
| M503T153   | 0.588637652 | 0.980486979 | 0.588637652 |
| M534T36_1  | 0.588560394 | 0.980490238 | 0.588560394 |
| M404T114_1 | 0.588531731 | 0.980491471 | 0.588531731 |
| M445T204   | 0.588530353 | 0.980491523 | 0.588530353 |
| M773T155   | 0.588483893 | 0.98049351  | 0.588483893 |
| M611T200   | 0.588329685 | 0.980500173 | 0.588329685 |
| M381T96    | 0.588227973 | 0.98050452  | 0.588227973 |
| M202T234   | 0.588217068 | 0.980504991 | 0.588217068 |
| M362T85    | 0.5882093   | 0.980506373 | 0.5882093   |
| M129T381   | 0.588086934 | 0.980510623 | 0.588086934 |
| M227T98    | 0.587975271 | 0.980515478 | 0.587975271 |
| M935T352   | 0.587853331 | 0.980520787 | 0.587853331 |
| M286T338   | 0.587749227 | 0.980525341 | 0.587749227 |
| M586T309   | 0.58760623  | 0.980531612 | 0.58760623  |
| M163T35_1  | 0.587516717 | 0.980535574 | 0.587516717 |
| M79T463    | 0.587465303 | 0.98053782  | 0.587465303 |
| M169T374   | 0.587358017 | 0.980542566 | 0.587358017 |
| M555T107   | 0.587313822 | 0.980544527 | 0.587313822 |
| M367T380   | 0.587085898 | 0.980554666 | 0.587085898 |
| M422T271   | 0.587056908 | 0.98055596  | 0.587056908 |
| M779T149   | 0.586987791 | 0.980559052 | 0.586987791 |
| M219T19    | 0.586489247 | 0.980581529 | 0.586489247 |
| M675T74    | 0.5864808   | 0.980581915 | 0.5864808   |
| M72T55     | 0.586386836 | 0.980586194 | 0.586386836 |
| M761T490_3 | 0.585878589 | 0.980609503 | 0.585878589 |
| M900T54_2  | 0.585824477 | 0.980612007 | 0.585824477 |
| M218T45    | 0.585694206 | 0.980603111 | 0.585694206 |
| M159T178   | 0.585336657 | 0.980634748 | 0.585336657 |
| M334T169   | 0.585295609 | 0.980636674 | 0.585295609 |
| M589T168_1 | 0.585177751 | 0.98064221  | 0.585177751 |
| M390T44    | 0.585161004 | 0.98064301  | 0.585161004 |
| M201T258   | 0.585152466 | 0.980643437 | 0.585152466 |
| M407T62    | 0.585063865 | 0.980647712 | 0.585063865 |
| M279T27    | 0.584720867 | 0.980666225 | 0.584720867 |
| M332T336   | 0.584511738 | 0.980673893 | 0.584511738 |
| M693T32_3  | 0.584476564 | 0.980675582 | 0.584476564 |
| M565T212   | 0.584474836 | 0.980675666 | 0.584474836 |
| M491T335   | 0.584412142 | 0.98067868  | 0.584412142 |
| M588T309   | 0.584368635 | 0.980680778 | 0.584368635 |
| M724T207   | 0.584293209 | 0.980684415 | 0.584293209 |
| M118T247   | 0.584247413 | 0.980687153 | 0.584247413 |
| M762T33    | 0.584217161 | 0.9806881   | 0.584217161 |

|            |             |             |             |
|------------|-------------|-------------|-------------|
| M792T161   | 0.58411699  | 0.980692954 | 0.58411699  |
| M487T230   | 0.584102109 | 0.980693672 | 0.584102109 |
| M707T196   | 0.5840518   | 0.980696115 | 0.5840518   |
| M966T33    | 0.58402861  | 0.980697242 | 0.58402861  |
| M671T196   | 0.58390519  | 0.980703257 | 0.58390519  |
| M277T272   | 0.583884359 | 0.980704289 | 0.583884359 |
| M202T300   | 0.583852852 | 0.980705815 | 0.583852852 |
| M740T181   | 0.58371253  | 0.980714694 | 0.58371253  |
| M655T387   | 0.583638174 | 0.980716341 | 0.583638174 |
| M79T261    | 0.583525764 | 0.98072188  | 0.583525764 |
| M316T73    | 0.58334787  | 0.980730676 | 0.58334787  |
| M1129T354  | 0.583289436 | 0.980733576 | 0.583289436 |
| M464T308   | 0.583251568 | 0.980735555 | 0.583251568 |
| M400T36    | 0.583202901 | 0.980737876 | 0.583202901 |
| M564T32    | 0.583161996 | 0.980739926 | 0.583161996 |
| M861T41    | 0.582834198 | 0.980756318 | 0.582834198 |
| M166T34    | 0.582812116 | 0.980757425 | 0.582812116 |
| M261T446   | 0.582648352 | 0.98076568  | 0.582648352 |
| M600T265   | 0.582647877 | 0.980765694 | 0.582647877 |
| M309T292   | 0.58261416  | 0.980767417 | 0.58261416  |
| M445T168_1 | 0.582330353 | 0.980781848 | 0.582330353 |
| M133T426   | 0.582234929 | 0.980786689 | 0.582234929 |
| M336T46    | 0.582102717 | 0.980793453 | 0.582102717 |
| M439T200   | 0.581969968 | 0.980800263 | 0.581969968 |
| M255T320   | 0.581762116 | 0.980810989 | 0.581762116 |
| M149T42    | 0.581658511 | 0.980816353 | 0.581658511 |
| M359T365   | 0.581649391 | 0.980816826 | 0.581649391 |
| M327T174   | 0.581513681 | 0.980823882 | 0.581513681 |
| M1145T36   | 0.581333547 | 0.98083328  | 0.581333547 |
| M981T182   | 0.581041713 | 0.98084865  | 0.581041713 |
| M527T110   | 0.580877477 | 0.980857285 | 0.580877477 |
| M246T384   | 0.580733934 | 0.980864899 | 0.580733934 |
| M357T483   | 0.580538644 | 0.980875307 | 0.580538644 |
| M1159T353  | 0.580488837 | 0.980877968 | 0.580488837 |
| M874T171   | 0.580206793 | 0.980893112 | 0.580206793 |
| M861T354   | 0.579953438 | 0.980906813 | 0.579953438 |
| M667T56    | 0.579945414 | 0.980907251 | 0.579945414 |
| M77T17     | 0.57973988  | 0.98091843  | 0.57973988  |
| M247T144   | 0.579657161 | 0.980922944 | 0.579657161 |
| M119T169   | 0.579584569 | 0.980926956 | 0.579584569 |
| M154T393   | 0.579435924 | 0.980935069 | 0.579435924 |
| M423T123   | 0.579403551 | 0.980937703 | 0.579403551 |

|             |             |             |             |
|-------------|-------------|-------------|-------------|
| M253T359    | 0.579401558 | 0.980937002 | 0.579401558 |
| M259T147    | 0.579305259 | 0.980942273 | 0.579305259 |
| M156T391    | 0.579289286 | 0.980943148 | 0.579289286 |
| M469T172    | 0.579125395 | 0.980952211 | 0.579125395 |
| M272T415    | 0.579107548 | 0.980953198 | 0.579107548 |
| M611T51     | 0.579042597 | 0.9809568   | 0.579042597 |
| M180T110    | 0.578837985 | 0.980968222 | 0.578837985 |
| M503T236    | 0.578800077 | 0.980970341 | 0.578800077 |
| M185T35     | 0.578524345 | 0.980985768 | 0.578524345 |
| M297T36     | 0.578319441 | 0.980997365 | 0.578319441 |
| M301T207    | 0.578270886 | 0.981000112 | 0.578270886 |
| M263T381    | 0.577946257 | 0.981018546 | 0.577946257 |
| M903T210    | 0.577773834 | 0.981028405 | 0.577773834 |
| M218T446    | 0.57765449  | 0.981035675 | 0.57765449  |
| M235T53     | 0.577502213 | 0.98104404  | 0.577502213 |
| M253T381    | 0.577442512 | 0.981047531 | 0.577442512 |
| M367T299    | 0.576936737 | 0.981076918 | 0.576936737 |
| M373T499    | 0.576816718 | 0.981083956 | 0.576816718 |
| M167T237    | 0.576778066 | 0.981086234 | 0.576778066 |
| M433T250    | 0.576718804 | 0.981089712 | 0.576718804 |
| M247T334    | 0.576356955 | 0.981111115 | 0.576356955 |
| M1183T352   | 0.576221773 | 0.981119216 | 0.576221773 |
| M285T137    | 0.576145346 | 0.981123736 | 0.576145346 |
| M337T346    | 0.576036978 | 0.981130201 | 0.576036978 |
| M415T292    | 0.575743405 | 0.981147845 | 0.575743405 |
| M268T259    | 0.575704835 | 0.981150173 | 0.575704835 |
| M511T352    | 0.575645107 | 0.981153835 | 0.575645107 |
| M283T201    | 0.57491017  | 0.981198617 | 0.57491017  |
| M583T351    | 0.574902199 | 0.981199109 | 0.574902199 |
| M361T32_2   | 0.574845575 | 0.981202749 | 0.574845575 |
| M313T299    | 0.574789553 | 0.981206104 | 0.574789553 |
| M448T130    | 0.574550782 | 0.981220836 | 0.574550782 |
| M642T35     | 0.574439168 | 0.981227854 | 0.574439168 |
| M251T351    | 0.573948043 | 0.981258536 | 0.573948043 |
| M129T48     | 0.57388717  | 0.981262375 | 0.57388717  |
| M635T414    | 0.573516856 | 0.981285845 | 0.573516856 |
| M142T34     | 0.573354579 | 0.981296195 | 0.573354579 |
| M1003T179   | 0.573327912 | 0.981297903 | 0.573327912 |
| M1188T292_1 | 0.573175143 | 0.981307687 | 0.573175143 |
| M282T34_2   | 0.573076073 | 0.981314422 | 0.573076073 |
| M788T209    | 0.573015643 | 0.98131794  | 0.573015643 |
| M329T143    | 0.57295625  | 0.98132182  | 0.57295625  |

|             |             |             |             |
|-------------|-------------|-------------|-------------|
| M129T403    | 0.5728832   | 0.981326538 | 0.5728832   |
| M605T352    | 0.572637788 | 0.981342394 | 0.572637788 |
| M473T228_1  | 0.57257321  | 0.981346593 | 0.57257321  |
| M776T118    | 0.572514879 | 0.981350469 | 0.572514879 |
| M723T352    | 0.572395452 | 0.981358191 | 0.572395452 |
| M272T378    | 0.572295344 | 0.981364744 | 0.572295344 |
| M309T44     | 0.572248371 | 0.981367825 | 0.572248371 |
| M1182T352   | 0.572090746 | 0.981378194 | 0.572090746 |
| M130T50     | 0.571950255 | 0.981387458 | 0.571950255 |
| M282T143    | 0.571579429 | 0.981412057 | 0.571579429 |
| M643T484    | 0.571463022 | 0.981419823 | 0.571463022 |
| M433T168    | 0.57140255  | 0.981423872 | 0.57140255  |
| M618T354    | 0.571125663 | 0.981442464 | 0.571125663 |
| M550T92     | 0.570837778 | 0.981461912 | 0.570837778 |
| M1182T465_3 | 0.570753476 | 0.981467683 | 0.570753476 |
| M187T279    | 0.570545848 | 0.981481794 | 0.570545848 |
| M1182T465_2 | 0.570399074 | 0.98149181  | 0.570399074 |
| M770T76     | 0.570293664 | 0.98149904  | 0.570293664 |
| M761T490_1  | 0.570219808 | 0.981504116 | 0.570219808 |
| M461T409    | 0.57021315  | 0.981504577 | 0.57021315  |
| M168T43     | 0.569995255 | 0.981519631 | 0.569995255 |
| M130T272    | 0.569991606 | 0.981519856 | 0.569991606 |
| M332T125    | 0.569887734 | 0.981527054 | 0.569887734 |
| M1177T37    | 0.569810058 | 0.981532439 | 0.569810058 |
| M359T259_1  | 0.569768011 | 0.981535399 | 0.569768011 |
| M189T307    | 0.569765128 | 0.981535553 | 0.569765128 |
| M331T381    | 0.569263299 | 0.98157071  | 0.569263299 |
| M765T123    | 0.569201028 | 0.981575017 | 0.569201028 |
| M300T99     | 0.568576152 | 0.981619332 | 0.568576152 |
| M419T83     | 0.568538144 | 0.98162208  | 0.568538144 |
| M589T234    | 0.568471022 | 0.981626848 | 0.568471022 |
| M378T184    | 0.568408083 | 0.981631388 | 0.568408083 |
| M636T174    | 0.568275301 | 0.981641009 | 0.568275301 |
| M98T374     | 0.568245667 | 0.981643068 | 0.568245667 |
| M591T161    | 0.568079078 | 0.981655079 | 0.568079078 |
| M389T321    | 0.567859582 | 0.981670922 | 0.567859582 |
| M424T33     | 0.567625844 | 0.98168801  | 0.567625844 |
| M1003T80    | 0.567394375 | 0.981704867 | 0.567394375 |
| M1124T36    | 0.567314296 | 0.981710928 | 0.567314296 |
| M1041T354_2 | 0.5672014   | 0.981719078 | 0.5672014   |
| M245T335    | 0.567100674 | 0.981726481 | 0.567100674 |
| M761T490_2  | 0.56702539  | 0.981732712 | 0.56702539  |

|             |             |             |             |
|-------------|-------------|-------------|-------------|
| M718T188    | 0.566952681 | 0.981737471 | 0.566952681 |
| M143T334    | 0.566455521 | 0.981774474 | 0.566455521 |
| M385T300    | 0.566134392 | 0.981798598 | 0.566134392 |
| M373T484_1  | 0.566086634 | 0.98180225  | 0.566086634 |
| M91T299     | 0.566049307 | 0.981805023 | 0.566049307 |
| M333T272    | 0.565925988 | 0.981814377 | 0.565925988 |
| M247T299    | 0.56554582  | 0.98183794  | 0.56554582  |
| M366T217_1  | 0.565319285 | 0.981860644 | 0.565319285 |
| M222T431    | 0.565309926 | 0.981861816 | 0.565309926 |
| M381T205    | 0.565169118 | 0.98187222  | 0.565169118 |
| M737T44     | 0.565161792 | 0.981872766 | 0.565161792 |
| M137T33     | 0.565079925 | 0.98187908  | 0.565079925 |
| M133T409    | 0.565045196 | 0.981881761 | 0.565045196 |
| M1114T36    | 0.564977465 | 0.981887108 | 0.564977465 |
| M236T393    | 0.564965612 | 0.981887918 | 0.564965612 |
| M398T34     | 0.564932318 | 0.981890493 | 0.564932318 |
| M596T169    | 0.564895757 | 0.981893337 | 0.564895757 |
| M218T323    | 0.56484289  | 0.981897444 | 0.56484289  |
| M228T40     | 0.564696292 | 0.981908827 | 0.564696292 |
| M427T219    | 0.5645464   | 0.981920559 | 0.5645464   |
| M99T408     | 0.56437587  | 0.981933934 | 0.56437587  |
| M311T18     | 0.564325359 | 0.981937827 | 0.564325359 |
| M293T177    | 0.564239268 | 0.981944591 | 0.564239268 |
| M647T257    | 0.563977909 | 0.981965205 | 0.563977909 |
| M409T33     | 0.563917509 | 0.981969989 | 0.563917509 |
| M237T467    | 0.56379501  | 0.981979697 | 0.56379501  |
| M159T466    | 0.563757338 | 0.981982691 | 0.563757338 |
| M255T242    | 0.56365165  | 0.981991106 | 0.56365165  |
| M1042T183   | 0.563604097 | 0.981994893 | 0.563604097 |
| M293T392    | 0.563482996 | 0.982004561 | 0.563482996 |
| M1103T339_2 | 0.563405073 | 0.982010803 | 0.563405073 |
| M447T99     | 0.563275049 | 0.982021247 | 0.563275049 |
| M99T24      | 0.56276209  | 0.982062669 | 0.56276209  |
| M291T272    | 0.56270444  | 0.982067349 | 0.56270444  |
| M1138T59    | 0.562644342 | 0.982072237 | 0.562644342 |
| M231T192    | 0.562641524 | 0.982072452 | 0.562641524 |
| M1037T352   | 0.562460972 | 0.982087494 | 0.562460972 |
| M947T27     | 0.562328643 | 0.982098005 | 0.562328643 |
| M861T90     | 0.562167817 | 0.982111216 | 0.562167817 |
| M315T452    | 0.561893451 | 0.982133847 | 0.561893451 |
| M1002T48    | 0.561609782 | 0.982157386 | 0.561609782 |
| M433T292    | 0.561604576 | 0.982157837 | 0.561604576 |

|             |             |             |             |
|-------------|-------------|-------------|-------------|
| M785T354    | 0.561558151 | 0.982161688 | 0.561558151 |
| M95T237     | 0.561392139 | 0.982175601 | 0.561392139 |
| M682T287    | 0.561331281 | 0.982180637 | 0.561331281 |
| M221T300    | 0.56119644  | 0.982191971 | 0.56119644  |
| M713T243    | 0.560944762 | 0.982213133 | 0.560944762 |
| M328T168    | 0.560553491 | 0.982246394 | 0.560553491 |
| M369T141    | 0.560383019 | 0.982261597 | 0.560383019 |
| M864T52     | 0.560299093 | 0.982268026 | 0.560299093 |
| M160T335    | 0.560293909 | 0.982268456 | 0.560293909 |
| M204T298    | 0.560139735 | 0.982281672 | 0.560139735 |
| M287T28     | 0.559768038 | 0.982313728 | 0.559768038 |
| M582T34     | 0.55971593  | 0.982318225 | 0.55971593  |
| M479T342    | 0.559684032 | 0.982321123 | 0.559684032 |
| M316T321    | 0.559650281 | 0.982323928 | 0.559650281 |
| M229T301    | 0.559435296 | 0.982342613 | 0.559435296 |
| M677T284    | 0.559389752 | 0.982346582 | 0.559389752 |
| M459T36_1   | 0.5590815   | 0.982373557 | 0.5590815   |
| M1187T354_1 | 0.558913407 | 0.982390376 | 0.558913407 |
| M235T221    | 0.558837576 | 0.982395026 | 0.558837576 |
| M457T54     | 0.558514075 | 0.982423734 | 0.558514075 |
| M290T294    | 0.558350705 | 0.982438244 | 0.558350705 |
| M265T621    | 0.557923056 | 0.982476501 | 0.557923056 |
| M99T463     | 0.557788613 | 0.982488609 | 0.557788613 |
| M137T35_1   | 0.557739073 | 0.982493079 | 0.557739073 |
| M355T123    | 0.557726556 | 0.98249421  | 0.557726556 |
| M287T150    | 0.557606727 | 0.982505044 | 0.557606727 |
| M254T357    | 0.557563389 | 0.982509012 | 0.557563389 |
| M166T120    | 0.557422257 | 0.982521774 | 0.557422257 |
| M657T27     | 0.556611022 | 0.982596198 | 0.556611022 |
| M277T35     | 0.556447686 | 0.982611231 | 0.556447686 |
| M341T113    | 0.556442972 | 0.982611669 | 0.556442972 |
| M392T124    | 0.55642952  | 0.982612916 | 0.55642952  |
| M168T149    | 0.556348978 | 0.982620391 | 0.556348978 |
| M158T299    | 0.556332645 | 0.98262191  | 0.556332645 |
| M609T344    | 0.556158129 | 0.982638666 | 0.556158129 |
| M192T678    | 0.555843412 | 0.982667603 | 0.555843412 |
| M855T125    | 0.555764189 | 0.982675049 | 0.555764189 |
| M1033T352   | 0.555690042 | 0.982682024 | 0.555690042 |
| M95T374     | 0.55544687  | 0.982704979 | 0.55544687  |
| M391T247    | 0.555301693 | 0.982718739 | 0.555301693 |
| M557T114    | 0.555158984 | 0.982732312 | 0.555158984 |
| M892T33     | 0.555153674 | 0.982732806 | 0.555153674 |

|            |             |             |             |
|------------|-------------|-------------|-------------|
| M217T206   | 0.555111127 | 0.982736859 | 0.555111127 |
| M553T186   | 0.554914982 | 0.982755583 | 0.554914982 |
| M114T381   | 0.554714549 | 0.982774827 | 0.554714549 |
| M339T354   | 0.554702916 | 0.982775914 | 0.554702916 |
| M365T285   | 0.554362835 | 0.982808705 | 0.554362835 |
| M875T171   | 0.554334693 | 0.982811421 | 0.554334693 |
| M519T383   | 0.553760663 | 0.982867307 | 0.553760663 |
| M228T116   | 0.553702878 | 0.982873052 | 0.553702878 |
| M327T285   | 0.553473233 | 0.982895532 | 0.553473233 |
| M507T203   | 0.553233966 | 0.982919152 | 0.553233966 |
| M332T351   | 0.553063726 | 0.982936028 | 0.553063726 |
| M410T274   | 0.552913266 | 0.982950992 | 0.552913266 |
| M277T584   | 0.552793216 | 0.982962964 | 0.552793216 |
| M225T26    | 0.552779623 | 0.982964338 | 0.552779623 |
| M295T396   | 0.552740661 | 0.982968213 | 0.552740661 |
| M434T84    | 0.55267199  | 0.982975083 | 0.55267199  |
| M838T433   | 0.55238857  | 0.983003528 | 0.55238857  |
| M483T409   | 0.552301237 | 0.983012324 | 0.552301237 |
| M889T352   | 0.552001389 | 0.983042654 | 0.552001389 |
| M359T208   | 0.551732796 | 0.983069971 | 0.551732796 |
| M930T423_4 | 0.551723817 | 0.983070879 | 0.551723817 |
| M540T114   | 0.551506304 | 0.983093112 | 0.551506304 |
| M205T258   | 0.551464876 | 0.983097358 | 0.551464876 |
| M231T393   | 0.551100391 | 0.983134854 | 0.551100391 |
| M733T33    | 0.550886668 | 0.983157012 | 0.550886668 |
| M723T82    | 0.550740165 | 0.983172193 | 0.550740165 |
| M263T231   | 0.550572537 | 0.983189651 | 0.550572537 |
| M251T671   | 0.550561765 | 0.98319082  | 0.550561765 |
| M346T130   | 0.550486516 | 0.983198735 | 0.550486516 |
| M346T104   | 0.550099684 | 0.983239225 | 0.550099684 |
| M548T36    | 0.549954087 | 0.983254547 | 0.549954087 |
| M434T34    | 0.549849066 | 0.983265681 | 0.549849066 |
| M674T191   | 0.549721125 | 0.983279643 | 0.549721125 |
| M367T38    | 0.549518026 | 0.983300836 | 0.549518026 |
| M825T351   | 0.549336462 | 0.983320216 | 0.549336462 |
| M531T32    | 0.549321941 | 0.983321772 | 0.549321941 |
| M435T40    | 0.54900233  | 0.983361724 | 0.54900233  |
| M215T328   | 0.548950671 | 0.983361617 | 0.548950671 |
| M611T413   | 0.548928016 | 0.983364056 | 0.548928016 |
| M869T52    | 0.548829759 | 0.983374664 | 0.548829759 |
| M433T34    | 0.548719308 | 0.983386771 | 0.548719308 |
| M132T264   | 0.548710509 | 0.98338756  | 0.548710509 |

|            |             |             |             |
|------------|-------------|-------------|-------------|
| M150T260   | 0.548676525 | 0.983391234 | 0.548676525 |
| M717T106   | 0.548568484 | 0.983402942 | 0.548568484 |
| M123T34    | 0.548310547 | 0.983431013 | 0.548310547 |
| M657T33    | 0.547941716 | 0.983471404 | 0.547941716 |
| M411T201   | 0.547920484 | 0.983473726 | 0.547920484 |
| M180T299   | 0.547901616 | 0.9834758   | 0.547901616 |
| M783T168   | 0.547836753 | 0.983482966 | 0.547836753 |
| M293T301   | 0.547676651 | 0.983500588 | 0.547676651 |
| M206T293   | 0.547528612 | 0.983516984 | 0.547528612 |
| M357T412   | 0.547385986 | 0.98353278  | 0.547385986 |
| M1131T38   | 0.547303139 | 0.983542009 | 0.547303139 |
| M409T17    | 0.547015988 | 0.983574068 | 0.547015988 |
| M686T56    | 0.546936432 | 0.983582931 | 0.546936432 |
| M418T122   | 0.546924739 | 0.983584244 | 0.546924739 |
| M303T83    | 0.54689459  | 0.983587634 | 0.54689459  |
| M237T299   | 0.546775834 | 0.983600947 | 0.546775834 |
| M672T235   | 0.546321088 | 0.983652282 | 0.546321088 |
| M343T222   | 0.546056768 | 0.983682325 | 0.546056768 |
| M881T352   | 0.54602516  | 0.983685931 | 0.54602516  |
| M323T84_1  | 0.545595059 | 0.983735193 | 0.545595059 |
| M145T258   | 0.545493151 | 0.983746905 | 0.545493151 |
| M185T26    | 0.545361397 | 0.983762105 | 0.545361397 |
| M163T33    | 0.545206896 | 0.983779998 | 0.545206896 |
| M339T319   | 0.544862655 | 0.983819988 | 0.544862655 |
| M762T158   | 0.544738747 | 0.983834447 | 0.544738747 |
| M390T91    | 0.544666448 | 0.983842967 | 0.544666448 |
| M246T128   | 0.544592917 | 0.98385152  | 0.544592917 |
| M619T34    | 0.544384654 | 0.983875976 | 0.544384654 |
| M787T352_2 | 0.544323792 | 0.983883148 | 0.544323792 |
| M983T42    | 0.544219338 | 0.983895474 | 0.544219338 |
| M754T35    | 0.544106468 | 0.983908802 | 0.544106468 |
| M248T409   | 0.544083176 | 0.98391156  | 0.544083176 |
| M754T32    | 0.543886835 | 0.983935178 | 0.543886835 |
| M581T171   | 0.543809248 | 0.983944068 | 0.543809248 |
| M368T384   | 0.543721304 | 0.983954539 | 0.543721304 |
| M987T100   | 0.543533503 | 0.983976981 | 0.543533503 |
| M298T284   | 0.543441246 | 0.983988    | 0.543441246 |
| M549T388   | 0.543429997 | 0.983989353 | 0.543429997 |
| M192T485   | 0.543373335 | 0.983996152 | 0.543373335 |
| M844T188   | 0.543179254 | 0.984019502 | 0.543179254 |
| M876T169   | 0.542980736 | 0.98404343  | 0.542980736 |
| M255T125   | 0.542513161 | 0.984100198 | 0.542513161 |

|             |             |             |             |
|-------------|-------------|-------------|-------------|
| M145T45     | 0.542491019 | 0.984102897 | 0.542491019 |
| M409T307    | 0.542490317 | 0.984102988 | 0.542490317 |
| M482T441    | 0.542487399 | 0.984103335 | 0.542487399 |
| M603T351    | 0.542481119 | 0.984104105 | 0.542481119 |
| M435T243    | 0.542450238 | 0.984107874 | 0.542450238 |
| M680T33     | 0.542226611 | 0.984135292 | 0.542226611 |
| M589T168_2  | 0.542212201 | 0.984137043 | 0.542212201 |
| M472T103    | 0.54179257  | 0.984188674 | 0.54179257  |
| M431T32_1   | 0.541788338 | 0.984189208 | 0.541788338 |
| M762T329    | 0.541533515 | 0.984220782 | 0.541533515 |
| M404T273    | 0.541515174 | 0.984223063 | 0.541515174 |
| M497T223    | 0.54151516  | 0.984223103 | 0.54151516  |
| M449T346    | 0.541456627 | 0.984230343 | 0.541456627 |
| M616T35     | 0.54096594  | 0.984291706 | 0.54096594  |
| M1040T352_2 | 0.540894384 | 0.984300664 | 0.540894384 |
| M317T164    | 0.540774994 | 0.984315694 | 0.540774994 |
| M81T334     | 0.540249845 | 0.984382294 | 0.540249845 |
| M367T261    | 0.540224966 | 0.984385375 | 0.540224966 |
| M427T297    | 0.539897108 | 0.984427254 | 0.539897108 |
| M767T81_1   | 0.539786917 | 0.984441383 | 0.539786917 |
| M678T161    | 0.539552411 | 0.984471562 | 0.539552411 |
| M155T584    | 0.539414801 | 0.984489328 | 0.539414801 |
| M309T352    | 0.539410874 | 0.984489836 | 0.539410874 |
| M686T352    | 0.53924674  | 0.984511275 | 0.53924674  |
| M603T207    | 0.539187098 | 0.984519839 | 0.539187098 |
| M623T289    | 0.539092446 | 0.984531132 | 0.539092446 |
| M1100T352   | 0.539070634 | 0.98453397  | 0.539070634 |
| M1163T39_2  | 0.539043843 | 0.984537459 | 0.539043843 |
| M284T300    | 0.53864232  | 0.984589928 | 0.53864232  |
| M279T293    | 0.538616991 | 0.984593593 | 0.538616991 |
| M314T113    | 0.538442579 | 0.984616183 | 0.538442579 |
| M1002T352_1 | 0.538420149 | 0.984619136 | 0.538420149 |
| M715T214    | 0.538347814 | 0.984628714 | 0.538347814 |
| M708T413    | 0.538328761 | 0.984631556 | 0.538328761 |
| M177T408    | 0.538067098 | 0.9846658   | 0.538067098 |
| M757T208    | 0.538053269 | 0.984667625 | 0.538053269 |
| M1046T58    | 0.537983702 | 0.984676859 | 0.537983702 |
| M814T199    | 0.537943411 | 0.984682215 | 0.537943411 |
| M978T160    | 0.537734209 | 0.984710068 | 0.537734209 |
| M272T120    | 0.537227435 | 0.984786189 | 0.537227435 |
| M593T291    | 0.537069232 | 0.984799339 | 0.537069232 |
| M767T106    | 0.536813423 | 0.98483444  | 0.536813423 |

|            |             |             |             |
|------------|-------------|-------------|-------------|
| M581T381   | 0.536758875 | 0.984841421 | 0.536758875 |
| M924T375   | 0.536024103 | 0.984941894 | 0.536024103 |
| M550T36_2  | 0.535872389 | 0.984962826 | 0.535872389 |
| M590T351   | 0.535823185 | 0.984970529 | 0.535823185 |
| M728T26_2  | 0.535801266 | 0.984972787 | 0.535801266 |
| M864T352   | 0.535744352 | 0.984980526 | 0.535744352 |
| M201T312   | 0.535725056 | 0.984983195 | 0.535725056 |
| M385T167   | 0.535682875 | 0.984989048 | 0.535682875 |
| M72T298    | 0.535568427 | 0.985004967 | 0.535568427 |
| M309T380   | 0.535533203 | 0.985009814 | 0.535533203 |
| M423T24    | 0.535457254 | 0.985020377 | 0.535457254 |
| M381T263   | 0.535317359 | 0.98504014  | 0.535317359 |
| M647T416   | 0.535146386 | 0.985063773 | 0.535146386 |
| M537T423   | 0.535098738 | 0.985144348 | 0.535098738 |
| M287T137   | 0.535073876 | 0.98507393  | 0.535073876 |
| M275T246   | 0.535072415 | 0.98507413  | 0.535072415 |
| M272T108   | 0.535011887 | 0.98508262  | 0.535011887 |
| M184T496   | 0.534906793 | 0.985098205 | 0.534906793 |
| M117T205_1 | 0.534878005 | 0.98510143  | 0.534878005 |
| M860T103   | 0.534145015 | 0.985205248 | 0.534145015 |
| M335T467   | 0.534042043 | 0.98521996  | 0.534042043 |
| M240T63    | 0.533738159 | 0.985263482 | 0.533738159 |
| M302T114   | 0.533659817 | 0.98527478  | 0.533659817 |
| M112T408   | 0.533640914 | 0.985278059 | 0.533640914 |
| M357T404   | 0.533378661 | 0.985312447 | 0.533378661 |
| M618T34    | 0.5333544   | 0.98531987  | 0.5333544   |
| M208T56    | 0.53330011  | 0.985326667 | 0.53330011  |
| M293T185   | 0.533275745 | 0.985330198 | 0.533275745 |
| M406T333   | 0.533209688 | 0.985340251 | 0.533209688 |
| M306T36    | 0.533004858 | 0.98537048  | 0.533004858 |
| M684T272   | 0.532643307 | 0.985422397 | 0.532643307 |
| M903T239   | 0.532619578 | 0.985425873 | 0.532619578 |
| M447T137   | 0.532495913 | 0.985444016 | 0.532495913 |
| M504T173   | 0.532235076 | 0.985482865 | 0.532235076 |
| M379T210   | 0.532140912 | 0.985496357 | 0.532140912 |
| M1014T53   | 0.532037202 | 0.985512764 | 0.532037202 |
| M613T354   | 0.532016106 | 0.985514846 | 0.532016106 |
| M317T301   | 0.532006776 | 0.985516257 | 0.532006776 |
| M972T58    | 0.531869063 | 0.985536693 | 0.531869063 |
| M161T44    | 0.531728322 | 0.985557644 | 0.531728322 |
| M627T202   | 0.531584513 | 0.985579098 | 0.531584513 |
| M316T185   | 0.531252748 | 0.985629188 | 0.531252748 |

|             |             |             |             |
|-------------|-------------|-------------|-------------|
| M387T351    | 0.530862985 | 0.985687785 | 0.530862985 |
| M1157T352   | 0.53086137  | 0.985688166 | 0.53086137  |
| M314T243    | 0.530773087 | 0.985701283 | 0.530773087 |
| M134T250    | 0.530525133 | 0.985739028 | 0.530525133 |
| M406T168    | 0.530500803 | 0.985742698 | 0.530500803 |
| M681T32     | 0.530492511 | 0.985743953 | 0.530492511 |
| M295T453    | 0.530451652 | 0.985750187 | 0.530451652 |
| M1158T353   | 0.530289699 | 0.98577513  | 0.530289699 |
| M211T51     | 0.530189516 | 0.985790289 | 0.530189516 |
| M348T142    | 0.53009333  | 0.985805045 | 0.53009333  |
| M145T402    | 0.52968107  | 0.985868606 | 0.52968107  |
| M95T34_2    | 0.529613857 | 0.985879015 | 0.529613857 |
| M241T34_1   | 0.529544993 | 0.985889687 | 0.529544993 |
| M731T26     | 0.529537499 | 0.985890856 | 0.529537499 |
| M233T372    | 0.52900647  | 0.985973656 | 0.52900647  |
| M662T174    | 0.528985383 | 0.985977731 | 0.528985383 |
| M598T169    | 0.528856956 | 0.985997108 | 0.528856956 |
| M243T47     | 0.5287105   | 0.986020148 | 0.5287105   |
| M1049T82    | 0.528666172 | 0.986027131 | 0.528666172 |
| M409T101    | 0.528368052 | 0.986074253 | 0.528368052 |
| M467T326    | 0.528242336 | 0.986095268 | 0.528242336 |
| M355T385    | 0.528055823 | 0.986124193 | 0.528055823 |
| M875T180    | 0.527650528 | 0.986188733 | 0.527650528 |
| M615T205    | 0.527582064 | 0.986199739 | 0.527582064 |
| M522T460    | 0.527503732 | 0.986212344 | 0.527503732 |
| M687T194    | 0.527360098 | 0.9862355   | 0.527360098 |
| M417T104    | 0.527242332 | 0.986254532 | 0.527242332 |
| M144T259    | 0.527213383 | 0.986259216 | 0.527213383 |
| M245T34_2   | 0.527076564 | 0.986281392 | 0.527076564 |
| M779T53     | 0.52703884  | 0.986287609 | 0.52703884  |
| M354T169    | 0.527032731 | 0.986288508 | 0.527032731 |
| M830T51     | 0.527025945 | 0.986289606 | 0.527025945 |
| M1012T352_2 | 0.526826302 | 0.986322092 | 0.526826302 |
| M709T198    | 0.52671746  | 0.986339925 | 0.52671746  |
| M431T292    | 0.526611016 | 0.986357292 | 0.526611016 |
| M402T103    | 0.526404901 | 0.986391056 | 0.526404901 |
| M237T95     | 0.526216991 | 0.986472761 | 0.526216991 |
| M148T370    | 0.526141537 | 0.986434417 | 0.526141537 |
| M591T207    | 0.525809598 | 0.986489371 | 0.525809598 |
| M593T408    | 0.525379431 | 0.98656108  | 0.525379431 |
| M290T60     | 0.525299125 | 0.986574534 | 0.525299125 |
| M340T35_2   | 0.524952299 | 0.986632835 | 0.524952299 |

|            |             |             |             |
|------------|-------------|-------------|-------------|
| M200T257   | 0.524829305 | 0.986653599 | 0.524829305 |
| M213T380   | 0.524726538 | 0.98667099  | 0.524726538 |
| M532T179   | 0.524678838 | 0.986679069 | 0.524678838 |
| M459T32    | 0.524469573 | 0.986714604 | 0.524469573 |
| M289T351   | 0.524420279 | 0.986723008 | 0.524420279 |
| M714T58    | 0.524233459 | 0.986756876 | 0.524233459 |
| M226T50    | 0.523840077 | 0.986822311 | 0.523840077 |
| M359T200   | 0.523788138 | 0.986831256 | 0.523788138 |
| M409T345   | 0.523715636 | 0.986843768 | 0.523715636 |
| M246T426   | 0.523684885 | 0.986849067 | 0.523684885 |
| M204T53    | 0.523463899 | 0.986887275 | 0.523463899 |
| M960T115   | 0.523308966 | 0.986914154 | 0.523308966 |
| M1020T24   | 0.523265419 | 0.986921721 | 0.523265419 |
| M183T370   | 0.523231433 | 0.986927633 | 0.523231433 |
| M201T389   | 0.523151143 | 0.986941615 | 0.523151143 |
| M322T231   | 0.522998833 | 0.986968188 | 0.522998833 |
| M147T105   | 0.522982222 | 0.986971092 | 0.522982222 |
| M1043T36   | 0.522853868 | 0.98699175  | 0.522853868 |
| M763T354   | 0.522675209 | 0.987024891 | 0.522675209 |
| M234T354   | 0.522667342 | 0.987026266 | 0.522667342 |
| M506T345   | 0.522509632 | 0.987054046 | 0.522509632 |
| M830T53    | 0.52240797  | 0.987071976 | 0.52240797  |
| M982T171   | 0.522312989 | 0.98708877  | 0.522312989 |
| M816T69    | 0.522185721 | 0.987111311 | 0.522185721 |
| M162T46    | 0.522148065 | 0.987117987 | 0.522148065 |
| M272T320   | 0.522038679 | 0.98713742  | 0.522038679 |
| M992T170   | 0.521989271 | 0.987146199 | 0.521989271 |
| M93T231    | 0.521950425 | 0.987153119 | 0.521950425 |
| M435T272   | 0.521867579 | 0.987168013 | 0.521867579 |
| M933T336   | 0.521722257 | 0.987193836 | 0.521722257 |
| M381T257   | 0.521432629 | 0.987245759 | 0.521432629 |
| M521T385   | 0.52123611  | 0.987281147 | 0.52123611  |
| M241T304   | 0.520942694 | 0.987334212 | 0.520942694 |
| M397T292   | 0.52093248  | 0.987336067 | 0.52093248  |
| M127T320_1 | 0.52085069  | 0.98735091  | 0.52085069  |
| M966T25    | 0.52084551  | 0.987351853 | 0.52084551  |
| M1006T178  | 0.520820122 | 0.987356917 | 0.520820122 |
| M406T305   | 0.520780503 | 0.987363715 | 0.520780503 |
| M763T255   | 0.520705218 | 0.987377369 | 0.520705218 |
| M478T408   | 0.520523887 | 0.987410451 | 0.520523887 |
| M968T26    | 0.520415358 | 0.987430306 | 0.520415358 |
| M797T198   | 0.520379694 | 0.987436834 | 0.520379694 |

|            |             |             |             |
|------------|-------------|-------------|-------------|
| M284T304   | 0.520356481 | 0.987441143 | 0.520356481 |
| M613T171   | 0.520324923 | 0.987446887 | 0.520324923 |
| M355T311   | 0.520053457 | 0.987496777 | 0.520053457 |
| M129T442   | 0.520038555 | 0.987499571 | 0.520038555 |
| M337T401   | 0.520034475 | 0.987500279 | 0.520034475 |
| M675T292   | 0.520026387 | 0.987501767 | 0.520026387 |
| M353T381_1 | 0.519976188 | 0.987511029 | 0.519976188 |
| M741T239   | 0.519891778 | 0.987527001 | 0.519891778 |
| M315T344   | 0.519850355 | 0.987534251 | 0.519850355 |
| M1050T168  | 0.519722146 | 0.987558015 | 0.519722146 |
| M267T63_1  | 0.519641976 | 0.987572883 | 0.519641976 |
| M1030T354  | 0.518753595 | 0.987851401 | 0.518753595 |
| M315T509   | 0.518499286 | 0.987787253 | 0.518499286 |
| M269T334   | 0.51847266  | 0.987792385 | 0.51847266  |
| M870T200   | 0.518224105 | 0.987839538 | 0.518224105 |
| M598T408   | 0.51745329  | 0.987987399 | 0.51745329  |
| M506T407   | 0.517176375 | 0.988041059 | 0.517176375 |
| M156T256   | 0.517147894 | 0.988046554 | 0.517147894 |
| M292T483_1 | 0.516727909 | 0.988128478 | 0.516727909 |
| M239T233   | 0.51651791  | 0.988169624 | 0.51651791  |
| M174T369   | 0.516463456 | 0.988180366 | 0.516463456 |
| M784T352   | 0.51640678  | 0.988191475 | 0.51640678  |
| M395T55    | 0.516244621 | 0.988223448 | 0.516244621 |
| M711T26_2  | 0.516169196 | 0.988238435 | 0.516169196 |
| M810T32    | 0.516138535 | 0.988244408 | 0.516138535 |
| M666T169   | 0.516131686 | 0.988250785 | 0.516131686 |
| M869T39    | 0.516092527 | 0.988253511 | 0.516092527 |
| M441T303   | 0.515844362 | 0.988302759 | 0.515844362 |
| M872T39    | 0.515357896 | 0.988399942 | 0.515357896 |
| M273T19    | 0.515185193 | 0.988435135 | 0.515185193 |
| M841T56    | 0.515160166 | 0.988439675 | 0.515160166 |
| M230T89    | 0.51507208  | 0.988457669 | 0.51507208  |
| M129T181_2 | 0.514873779 | 0.988497498 | 0.514873779 |
| M924T35    | 0.514819428 | 0.988508496 | 0.514819428 |
| M323T32    | 0.51454832  | 0.988563556 | 0.51454832  |
| M366T310   | 0.514284859 | 0.988617332 | 0.514284859 |
| M298T289   | 0.51423428  | 0.988627682 | 0.51423428  |
| M776T94    | 0.513848537 | 0.988706955 | 0.513848537 |
| M1191T172  | 0.513744604 | 0.988728405 | 0.513744604 |
| M294T105   | 0.513615989 | 0.988755022 | 0.513615989 |
| M215T31    | 0.513605962 | 0.988757041 | 0.513605962 |
| M144T258   | 0.51343657  | 0.988792225 | 0.51343657  |

|             |             |             |             |
|-------------|-------------|-------------|-------------|
| M247T381    | 0.51327846  | 0.988825124 | 0.51327846  |
| M135T93     | 0.513103634 | 0.988861623 | 0.513103634 |
| M896T57     | 0.512730197 | 0.988939935 | 0.512730197 |
| M702T40     | 0.512616595 | 0.988963869 | 0.512616595 |
| M309T316    | 0.512482009 | 0.988992279 | 0.512482009 |
| M801T250_2  | 0.512373687 | 0.989015203 | 0.512373687 |
| M900T38     | 0.512326709 | 0.989025102 | 0.512326709 |
| M1070T354_2 | 0.512300829 | 0.989030647 | 0.512300829 |
| M615T235    | 0.512061057 | 0.98908161  | 0.512061057 |
| M298T167    | 0.511843376 | 0.989128088 | 0.511843376 |
| M457T200    | 0.511692095 | 0.989160488 | 0.511692095 |
| M527T146    | 0.511521403 | 0.989197141 | 0.511521403 |
| M168T495    | 0.511514443 | 0.98919864  | 0.511514443 |
| M266T256    | 0.511392602 | 0.989224888 | 0.511392602 |
| M365T409    | 0.51121565  | 0.989263111 | 0.51121565  |
| M743T148    | 0.510940316 | 0.989323056 | 0.510940316 |
| M95T348     | 0.510768242 | 0.989360329 | 0.510768242 |
| M220T117    | 0.510762478 | 0.989361559 | 0.510762478 |
| M219T263    | 0.510710596 | 0.989373819 | 0.510710596 |
| M396T176    | 0.510662603 | 0.989374449 | 0.510662603 |
| M167T42     | 0.51063813  | 0.989388712 | 0.51063813  |
| M501T159    | 0.510414826 | 0.989437817 | 0.510414826 |
| M375T36     | 0.510404075 | 0.989440001 | 0.510404075 |
| M581T234    | 0.510393505 | 0.98944232  | 0.510393505 |
| M731T78     | 0.510257113 | 0.98947232  | 0.510257113 |
| M405T73     | 0.510112724 | 0.98950415  | 0.510112724 |
| M588T36     | 0.510053611 | 0.989517211 | 0.510053611 |
| M229T371    | 0.509981245 | 0.989533468 | 0.509981245 |
| M1007T177   | 0.509588579 | 0.989620414 | 0.509588579 |
| M460T317    | 0.508829393 | 0.989790827 | 0.508829393 |
| M557T24     | 0.508828038 | 0.989791116 | 0.508828038 |
| M1011T79    | 0.508752926 | 0.989808423 | 0.508752926 |
| M390T56     | 0.508668061 | 0.989827335 | 0.508668061 |
| M155T251    | 0.508647434 | 0.989832016 | 0.508647434 |
| M934T352_2  | 0.508550571 | 0.989853967 | 0.508550571 |
| M186T135    | 0.508447726 | 0.989877396 | 0.508447726 |
| M825T52     | 0.508377759 | 0.98989334  | 0.508377759 |
| M266T63     | 0.508305898 | 0.989909711 | 0.508305898 |
| M491T254    | 0.508213436 | 0.989930809 | 0.508213436 |
| M849T129    | 0.50817699  | 0.989939132 | 0.50817699  |
| M740T79     | 0.507937569 | 0.989994266 | 0.507937569 |
| M352T138    | 0.507742979 | 0.990039081 | 0.507742979 |

|             |             |             |             |
|-------------|-------------|-------------|-------------|
| M626T33     | 0.507723636 | 0.990043307 | 0.507723636 |
| M1187T292   | 0.507581181 | 0.990076236 | 0.507581181 |
| M262T112    | 0.507507146 | 0.990093355 | 0.507507146 |
| M506T169    | 0.507435942 | 0.990109854 | 0.507435942 |
| M440T169    | 0.507235169 | 0.99015649  | 0.507235169 |
| M317T407    | 0.507217403 | 0.990160631 | 0.507217403 |
| M546T35     | 0.507139674 | 0.990178743 | 0.507139674 |
| M588T114    | 0.507095702 | 0.990189025 | 0.507095702 |
| M1021T52    | 0.507056361 | 0.990198183 | 0.507056361 |
| M127T35_1   | 0.507051009 | 0.990199435 | 0.507051009 |
| M452T200    | 0.506758146 | 0.990268015 | 0.506758146 |
| M980T168_2  | 0.506669537 | 0.990288847 | 0.506669537 |
| M1076T318_3 | 0.506573984 | 0.99031134  | 0.506573984 |
| M100T78     | 0.506416162 | 0.990348584 | 0.506416162 |
| M263T115    | 0.505887739 | 0.990474079 | 0.505887739 |
| M853T50     | 0.505815547 | 0.990491321 | 0.505815547 |
| M1028T34    | 0.505754284 | 0.990506146 | 0.505754284 |
| M476T317    | 0.505686219 | 0.990522248 | 0.505686219 |
| M253T37     | 0.505681764 | 0.990523364 | 0.505681764 |
| M276T41     | 0.505220182 | 0.990634393 | 0.505220182 |
| M235T406    | 0.504761075 | 0.990746065 | 0.504761075 |
| M147T704    | 0.504552921 | 0.990797389 | 0.504552921 |
| M257T337    | 0.504539581 | 0.990799901 | 0.504539581 |
| M859T49     | 0.504439934 | 0.990824313 | 0.504439934 |
| M333T246    | 0.504296829 | 0.990859445 | 0.504296829 |
| M155T334    | 0.504281957 | 0.990863127 | 0.504281957 |
| M725T131    | 0.504267058 | 0.990866772 | 0.504267058 |
| M729T81     | 0.504202169 | 0.990882737 | 0.504202169 |
| M100T59     | 0.504183732 | 0.99088727  | 0.504183732 |
| M1002T167   | 0.504150555 | 0.990895471 | 0.504150555 |
| M1060T353_2 | 0.504114477 | 0.990904319 | 0.504114477 |
| M717T153    | 0.50382281  | 0.990976782 | 0.50382281  |
| M371T233    | 0.503664238 | 0.991015891 | 0.503664238 |
| M830T33     | 0.503650785 | 0.991019694 | 0.503650785 |
| M812T49_2   | 0.503537829 | 0.99104738  | 0.503537829 |
| M405T50     | 0.503372406 | 0.991088702 | 0.503372406 |
| M347T123    | 0.503368699 | 0.991089632 | 0.503368699 |
| M279T373    | 0.503343736 | 0.991095869 | 0.503343736 |
| M495T201    | 0.503326312 | 0.991100238 | 0.503326312 |
| M719T54     | 0.503271241 | 0.991115289 | 0.503271241 |
| M130T242    | 0.503181709 | 0.991136978 | 0.503181709 |
| M549T344    | 0.503132738 | 0.991148783 | 0.503132738 |

|             |             |             |             |
|-------------|-------------|-------------|-------------|
| M561T210    | 0.503033783 | 0.991173683 | 0.503033783 |
| M799T53     | 0.502866063 | 0.991215966 | 0.502866063 |
| M359T234    | 0.502825755 | 0.991226149 | 0.502825755 |
| M183T299    | 0.50267844  | 0.991263464 | 0.50267844  |
| M430T345    | 0.502478126 | 0.991314338 | 0.502478126 |
| M267T286    | 0.502345356 | 0.991348125 | 0.502345356 |
| M702T211    | 0.502257074 | 0.991370685 | 0.502257074 |
| M335T161    | 0.501818949 | 0.991483053 | 0.501818949 |
| M291T321    | 0.501551899 | 0.991552009 | 0.501551899 |
| M658T35     | 0.501486472 | 0.991568979 | 0.501486472 |
| M187T301    | 0.501436334 | 0.991581977 | 0.501436334 |
| M726T52     | 0.501402917 | 0.991590657 | 0.501402917 |
| M840T209    | 0.501348042 | 0.991604911 | 0.501348042 |
| M189T59     | 0.500999847 | 0.991695736 | 0.500999847 |
| M399T41     | 0.500997297 | 0.99169639  | 0.500997297 |
| M449T28     | 0.500858921 | 0.991732642 | 0.500858921 |
| M505T159    | 0.500382317 | 0.991858279 | 0.500382317 |
| M85T260     | 0.500283138 | 0.991884548 | 0.500283138 |
| M233T33     | 0.500258386 | 0.99189111  | 0.500258386 |
| M417T332    | 0.500018065 | 0.991955046 | 0.500018065 |
| M596T309    | 0.500013921 | 0.991956151 | 0.500013921 |
| M690T499_1  | 0.499953289 | 0.991972373 | 0.499953289 |
| M822T68     | 0.499802469 | 0.992012648 | 0.499802469 |
| M397T320    | 0.499753455 | 0.992025822 | 0.499753455 |
| M239T210    | 0.499735628 | 0.992030561 | 0.499735628 |
| M387T136    | 0.499592878 | 0.992068879 | 0.499592878 |
| M217T234    | 0.499470041 | 0.9921019   | 0.499470041 |
| M459T123    | 0.499300595 | 0.992147671 | 0.499300595 |
| M1089T352_2 | 0.499115023 | 0.992197934 | 0.499115023 |
| M876T97     | 0.499075973 | 0.992209537 | 0.499075973 |
| M739T171    | 0.498743367 | 0.992299136 | 0.498743367 |
| M178T262    | 0.498718308 | 0.992305972 | 0.498718308 |
| M526T145    | 0.498690715 | 0.992313559 | 0.498690715 |
| M545T97     | 0.498529253 | 0.99235776  | 0.498529253 |
| M409T204    | 0.498506891 | 0.99236391  | 0.498506891 |
| M414T224    | 0.498186051 | 0.992452258 | 0.498186051 |
| M246T336    | 0.497523315 | 0.992636575 | 0.497523315 |
| M949T236    | 0.497434046 | 0.992661538 | 0.497434046 |
| M301T42     | 0.497313902 | 0.992695295 | 0.497313902 |
| M846T187    | 0.497216084 | 0.992722785 | 0.497216084 |
| M262T497    | 0.497054636 | 0.992768309 | 0.497054636 |
| M837T68_2   | 0.49685248  | 0.992825518 | 0.49685248  |

|             |             |             |             |
|-------------|-------------|-------------|-------------|
| M119T34     | 0.496709094 | 0.992866198 | 0.496709094 |
| M595T337    | 0.496507356 | 0.992923727 | 0.496507356 |
| M1053T35    | 0.496409961 | 0.992951563 | 0.496409961 |
| M421T212    | 0.496242883 | 0.992999741 | 0.496242883 |
| M365T52     | 0.496097466 | 0.993041233 | 0.496097466 |
| M1181T465_3 | 0.495968123 | 0.993078513 | 0.495968123 |
| M685T199    | 0.495906297 | 0.993096363 | 0.495906297 |
| M374T115    | 0.495480492 | 0.99321992  | 0.495480492 |
| M423T232    | 0.494808824 | 0.993417336 | 0.494808824 |
| M1091T353   | 0.494807511 | 0.993417379 | 0.494807511 |
| M415T54     | 0.494606022 | 0.993477025 | 0.494606022 |
| M653T33     | 0.494586291 | 0.993482871 | 0.494586291 |
| M370T319    | 0.494499556 | 0.993508742 | 0.494499556 |
| M259T34     | 0.494416169 | 0.993533435 | 0.494416169 |
| M487T121    | 0.494092612 | 0.993630089 | 0.494092612 |
| M885T39     | 0.493948671 | 0.993673285 | 0.493948671 |
| M936T161    | 0.493948472 | 0.9936733   | 0.493948472 |
| M239T42     | 0.49389058  | 0.993690707 | 0.49389058  |
| M342T389    | 0.493868734 | 0.993697295 | 0.493868734 |
| M251T238    | 0.493842204 | 0.993705272 | 0.493842204 |
| M203T36     | 0.493772513 | 0.993726322 | 0.493772513 |
| M163T111    | 0.493728239 | 0.993739776 | 0.493728239 |
| M595T409    | 0.493606797 | 0.993776399 | 0.493606797 |
| M231T378    | 0.493599818 | 0.993778519 | 0.493599818 |
| M138T4      | 0.493522918 | 0.99380188  | 0.493522918 |
| M361T361    | 0.49337719  | 0.993846083 | 0.49337719  |
| M173T334    | 0.493265583 | 0.993880045 | 0.493265583 |
| M1076T318_1 | 0.493224104 | 0.993892712 | 0.493224104 |
| M904T40     | 0.492847672 | 0.994007959 | 0.492847672 |
| M293T119    | 0.49278953  | 0.99402585  | 0.49278953  |
| M117T706    | 0.492328905 | 0.994168314 | 0.492328905 |
| M293T25     | 0.492200514 | 0.99420827  | 0.492200514 |
| M245T41     | 0.492195304 | 0.994209885 | 0.492195304 |
| M689T124    | 0.491757015 | 0.994347104 | 0.491757015 |
| M515T36     | 0.491693936 | 0.994366996 | 0.491693936 |
| M290T121    | 0.491652861 | 0.994379894 | 0.491652861 |
| M791T200    | 0.491521745 | 0.994421275 | 0.491521745 |
| M580T74     | 0.49143998  | 0.99444713  | 0.49143998  |
| M708T32     | 0.491352839 | 0.994474758 | 0.491352839 |
| M401T247    | 0.491117625 | 0.994549547 | 0.491117625 |
| M609T275    | 0.490829244 | 0.994641753 | 0.490829244 |
| M250T300    | 0.490599976 | 0.994715458 | 0.490599976 |

|            |             |             |             |
|------------|-------------|-------------|-------------|
| M155T35_2  | 0.490403178 | 0.994779023 | 0.490403178 |
| M255T466   | 0.490234059 | 0.994833871 | 0.490234059 |
| M409T363   | 0.490187944 | 0.994848848 | 0.490187944 |
| M787T72    | 0.490123485 | 0.994869915 | 0.490123485 |
| M312T128   | 0.489742515 | 0.994994413 | 0.489742515 |
| M455T201   | 0.489669416 | 0.995018411 | 0.489669416 |
| M307T247   | 0.489494752 | 0.995075984 | 0.489494752 |
| M576T408   | 0.489361138 | 0.995120121 | 0.489361138 |
| M256T376   | 0.489240009 | 0.995160865 | 0.489240009 |
| M529T114   | 0.489102013 | 0.995206161 | 0.489102013 |
| M681T33    | 0.488998049 | 0.995240787 | 0.488998049 |
| M236T374   | 0.488959695 | 0.9952536   | 0.488959695 |
| M603T152   | 0.488661242 | 0.99535355  | 0.488661242 |
| M1023T188  | 0.488580934 | 0.995380626 | 0.488580934 |
| M873T171   | 0.488359787 | 0.995455292 | 0.488359787 |
| M545T62    | 0.488309251 | 0.995464003 | 0.488309251 |
| M237T408   | 0.488205034 | 0.995507702 | 0.488205034 |
| M916T30    | 0.488081732 | 0.995549691 | 0.488081732 |
| M1008T180  | 0.488054869 | 0.995623886 | 0.488054869 |
| M586T312   | 0.487559646 | 0.995728551 | 0.487559646 |
| M676T465_2 | 0.487536682 | 0.995736455 | 0.487536682 |
| M491T136   | 0.487404687 | 0.99578321  | 0.487404687 |
| M597T336   | 0.48723225  | 0.995841799 | 0.48723225  |
| M649T409   | 0.486616877 | 0.996056952 | 0.486616877 |
| M399T53    | 0.48628851  | 0.996173028 | 0.48628851  |
| M504T37    | 0.486221362 | 0.996196878 | 0.486221362 |
| M181T231   | 0.48621072  | 0.996200747 | 0.48621072  |
| M645T200   | 0.486095474 | 0.996241688 | 0.486095474 |
| M203T430   | 0.485954486 | 0.99629218  | 0.485954486 |
| M505T28    | 0.485445682 | 0.996476419 | 0.485445682 |
| M465T37    | 0.485329687 | 0.996517172 | 0.485329687 |
| M296T83    | 0.485174606 | 0.996573605 | 0.485174606 |
| M215T207   | 0.485048541 | 0.996619597 | 0.485048541 |
| M274T401   | 0.484812914 | 0.996706304 | 0.484812914 |
| M134T65    | 0.484773896 | 0.996720328 | 0.484773896 |
| M688T352_1 | 0.484037047 | 0.996993911 | 0.484037047 |
| M201T261   | 0.484031623 | 0.996996009 | 0.484031623 |
| M246T554   | 0.483320267 | 0.997266495 | 0.483320267 |
| M449T105   | 0.483214919 | 0.997305357 | 0.483214919 |
| M483T58    | 0.483195777 | 0.997312705 | 0.483195777 |
| M142T113   | 0.482960379 | 0.997403132 | 0.482960379 |
| M298T34_2  | 0.482921772 | 0.997418012 | 0.482921772 |

|            |             |             |             |
|------------|-------------|-------------|-------------|
| M148T286   | 0.482809627 | 0.99746133  | 0.482809627 |
| M1108T354  | 0.482781641 | 0.997472107 | 0.482781641 |
| M471T354   | 0.482671786 | 0.997514695 | 0.482671786 |
| M260T105   | 0.482614506 | 0.997537025 | 0.482614506 |
| M590T352   | 0.482610484 | 0.997538522 | 0.482610484 |
| M267T209   | 0.482607344 | 0.997539816 | 0.482607344 |
| M543T60    | 0.482388003 | 0.99761627  | 0.482388003 |
| M104T235   | 0.482246455 | 0.997681339 | 0.482246455 |
| M360T200_1 | 0.482088901 | 0.997742818 | 0.482088901 |
| M330T253   | 0.48200209  | 0.997777176 | 0.48200209  |
| M278T126   | 0.481775319 | 0.997867125 | 0.481775319 |
| M275T145   | 0.481657516 | 0.997914076 | 0.481657516 |
| M118T506   | 0.481410889 | 0.998012875 | 0.481410889 |
| M163T415   | 0.481385837 | 0.998022953 | 0.481385837 |
| M198T259   | 0.481379163 | 0.998025641 | 0.481379163 |
| M346T319   | 0.481215506 | 0.998091648 | 0.481215506 |
| M813T39    | 0.481006783 | 0.998176368 | 0.481006783 |
| M226T35    | 0.480933926 | 0.99820587  | 0.480933926 |
| M747T78    | 0.480908197 | 0.998216432 | 0.480908197 |
| M470T34    | 0.480866705 | 0.99823336  | 0.480866705 |
| M411T37    | 0.480772339 | 0.998271793 | 0.480772339 |
| M293T32    | 0.480447242 | 0.998405715 | 0.480447242 |
| M292T436   | 0.480404718 | 0.998423326 | 0.480404718 |
| M461T411   | 0.479877459 | 0.998643345 | 0.479877459 |
| M417T170   | 0.4798701   | 0.998646437 | 0.4798701   |
| M711T193   | 0.479424424 | 0.998835207 | 0.479424424 |
| M263T408   | 0.479036029 | 0.999001939 | 0.479036029 |
| M528T34    | 0.478941287 | 0.999043004 | 0.478941287 |
| M801T403   | 0.478728225 | 0.99913564  | 0.478728225 |
| M296T53    | 0.478586907 | 0.999197594 | 0.478586907 |
| M163T274   | 0.478483218 | 0.999242857 | 0.478483218 |
| M281T254   | 0.478434262 | 0.999264301 | 0.478434262 |
| M277T45    | 0.478390254 | 0.999283844 | 0.478390254 |
| M447T39    | 0.478219124 | 0.999359322 | 0.478219124 |
| M420T166   | 0.478139185 | 0.999394746 | 0.478139185 |
| M490T169   | 0.478018561 | 0.999448257 | 0.478018561 |
| M188T345   | 0.47792468  | 0.999490142 | 0.47792468  |
| M670T199   | 0.47762021  | 0.999626129 | 0.47762021  |
| M402T34    | 0.477606216 | 0.999632423 | 0.477606216 |
| M150T59    | 0.477601345 | 0.99963457  | 0.477601345 |
| M387T258   | 0.477093307 | 0.999859462 | 0.477093307 |
| M137T272   | 0.477039487 | 0.999882294 | 0.477039487 |

|           |             |             |             |
|-----------|-------------|-------------|-------------|
| M323T116  | 0.476833347 | 0.999964745 | 0.476833347 |
| M268T167  | 0.476754061 | 0.999990519 | 0.476754061 |
| M269T101  | 0.476750592 | 0.99999152  | 0.476750592 |
| M74T181   | 0.472658862 | 2.227567952 | 0.472658862 |
| M497T107  | 0.452916796 | 2.611166025 | 0.452916796 |
| M471T182  | 0.420909908 | 1.373896321 | 0.420909908 |
| M181T53_2 | 0.412173751 | 1.389382071 | 0.412173751 |
| M327T392  | 0.336463001 | 82.44592876 | 0.336463001 |

**Table S8.** Selective annotated metabolites.

| Metabolite ID | Classification            | Description                 | KEGG.ID | Wb-NE vs Wb-T | Wb-T vs Cb-C | Common |
|---------------|---------------------------|-----------------------------|---------|---------------|--------------|--------|
| M166T177      | Alkaloid                  | Hordenine                   | C06199  | √             |              |        |
| M152T230      | Alkaloid                  | N-Methyltyramine            |         | √             |              |        |
| M159T178      | Amines                    | Allantoin                   | C01551  |               |              | √      |
| M157T181      | Amines                    | Allantoin                   | C01551  | √             |              |        |
| M177T242      | Amines                    | Serotonin                   | C00780  |               |              | √      |
| M150T167      | Amines                    | Triethanolamine             | C06771  |               |              | √      |
| M100T59       | Amines                    | Cyclohexylamine             | C00571  |               | √            |        |
| M184T496      | Amines                    | Phosphorylcholine           | C00588  |               | √            |        |
| M118T2722     | Amines                    | Betaine                     | C00719  |               | √            |        |
| M136T299      | Amines                    | Dopamine                    | C03758  |               | √            |        |
| M116T309      | Amino acid and derivative | D-Proline                   | C00763  |               |              | √      |
| M132T168      | Amino acid and derivative | L-Leucine                   | C00123  |               |              | √      |
| M114T310      | Amino acid and derivative | L-Proline                   | C00148  |               |              | √      |
| M120T365      | Amino acid and derivative | L-Threonine                 | C00188  | √             |              |        |
| M557T304      | Amino acid and derivative | Lys-Leu                     |         |               |              | √      |
| M246T403      | Amino acid and derivative | Lys-Val                     |         | √             |              |        |
| M217T370      | Amino acid and derivative | N-.alpha.-Acetyl-L-arginine |         | √             |              |        |
| M191T306      | Amino acid and derivative | Thr-Ala                     |         | √             |              |        |
| M233T241      | Amino acid and derivative | Thr-Leu                     |         | √             |              |        |
| M267T220      | Amino acid and derivative | Thr-Phe                     |         | √             |              |        |
| M330T255      | Amino acid and derivative | Tyr-Met                     |         | √             |              |        |
| M298T499      | Amino acid and derivative | Val-Tyr                     |         |               |              | √      |

|          |                           |                                  |        |   |   |   |
|----------|---------------------------|----------------------------------|--------|---|---|---|
| M219T19  | Amino acid and derivative | BHT                              |        |   |   | √ |
| M215T371 | Amino acid and derivative | N-.alpha.-Acetyl-L-arginine      |        | √ |   |   |
| M205T258 | Amino acid and derivative | L-Tryptophan                     | C00078 |   | √ |   |
| M148T386 | Amino acid and derivative | L-Glutamate                      | C00025 |   | √ |   |
| M232T452 | Amino acid and derivative | N-(omega)-Hydroxyarginine        | C05933 |   | √ |   |
| M275T439 | Amino acid and derivative | gamma-L-Glutamyl-L-glutamic acid | C05282 |   | √ |   |
| M146T385 | Amino acid and derivative | L-Glutamate                      | C00025 |   | √ |   |
| M130T272 | Amino acid and derivative | L-Isoleucine                     | C00407 |   | √ |   |
| M116T299 | Amino acid and derivative | L-Valine                         | C00183 |   | √ |   |
| M130T363 | Amino acid and derivative | N-Acetyl-L-alanine               |        |   | √ |   |
| M133T374 | Amino acid and derivative | L-Asparagine                     | C00152 |   | √ |   |
| M182T299 | Amino acid and derivative | L-Tyrosine                       | C00082 |   | √ |   |
| M131T374 | Amino acid and derivative | L-Asparagine                     | C00152 |   | √ |   |
| M218T446 | Amino acid and derivative | Ala-Lys                          |        |   | √ |   |
| M246T426 | Amino acid and derivative | Arg-Ala                          |        |   | √ |   |
| M219T262 | Amino acid and derivative | Ser-Ile                          |        |   | √ |   |
| M260T281 | Amino acid and derivative | Ile-Ser                          |        |   | √ |   |
| M234T444 | Amino acid and derivative | Lys-Ser                          |        |   | √ |   |
| M248T444 | Amino acid and derivative | Lys-Thr                          |        |   | √ |   |
| M294T254 | Amino acid and derivative | Phe-Gln                          |        |   | √ |   |
| M287T137 | Amino acid and derivative | Prilocaine                       |        |   | √ |   |
| M187T335 | Amino acid and derivative | Pro-Ala                          |        |   | √ |   |
| M272T415 | Amino acid and derivative | Pro-Arg                          |        |   | √ |   |
| M207T326 | Amino acid and derivative | Ser-Thr                          |        |   | √ |   |
| M205T286 | Amino acid and derivative | Ser-Val                          |        |   | √ |   |

|          |                           |                               |        |   |   |   |
|----------|---------------------------|-------------------------------|--------|---|---|---|
| M248T427 | Amino acid and derivative | Thr-Lys                       |        |   | √ |   |
| M386T155 | Amino acid and derivative | Tyr-Gln                       |        |   | √ |   |
| M246T274 | Amino acid and derivative | Val-Gln                       |        |   | √ |   |
| M231T192 | Amino acid and derivative | Val-Ile                       |        |   | √ |   |
| M217T206 | Amino acid and derivative | Val-Val                       |        |   | √ |   |
| M187T328 | Carboxylic Acids          | Azelaic acid                  | C08261 |   |   | √ |
| M136T286 | Carboxylic Acids          | Anthranilic acid (Vitamin L1) | C00108 | √ |   |   |
| M160T397 | Carboxylic Acids          | DL-2-Aminoadipic acid         | C00956 |   |   | √ |
| M129T442 | Carboxylic Acids          | Mesaconic acid                | C01732 |   | √ |   |
| M162T398 | Carboxylic Acids          | DL-2-Aminoadipic acid         | C00956 |   | √ |   |
| M149T31  | Carboxylic Acids          | 1,2-Benzenedicarboxylic acid  |        |   | √ |   |
| M171T268 | Carboxylic Acids          | 3-Dehydroshikimic acid        |        |   | √ |   |
| M114T374 | Carboxylic Acids          | Maleamic acid                 |        |   | √ |   |
| M298T319 | Glycosides                | 1-methylguanosine             |        |   |   | √ |
| M282T294 | Glycosides                | 1-Methyladenosine             | C02494 |   | √ |   |
| M284T260 | Glycosides                | Guanosine                     | C00387 |   | √ |   |
| M282T129 | Glycosides                | N6-methyladenosine            |        |   | √ |   |
| M245T157 | Glycosides                | Uridine                       | C00299 |   | √ |   |
| M282T260 | Glycosides                | Guanosine                     | C00387 |   | √ |   |
| M257T140 | Glycosides                | Ribothymidine                 |        |   | √ |   |
| M303T158 | Glycosides                | Uridine                       | C00299 |   | √ |   |
| M549T388 | Glycosides                | Gemcitabine                   |        |   | √ |   |
| M336T68  | Glycosides                | Isopentenyladenosine          |        |   | √ |   |
| M298T284 | Glycosides                | 8-hydroxy Guanosine           |        |   | √ |   |
| M268T167 | Glycosides                | Adenosine                     | C00212 |   | √ |   |

|          |                              |                                                                     |        |   |   |   |
|----------|------------------------------|---------------------------------------------------------------------|--------|---|---|---|
| M263T342 | Lipids                       | Linoleic acid                                                       | C01595 |   |   | √ |
| M255T45  | Lipids                       | Palmitic acid                                                       | C00249 | √ |   |   |
| M283T44  | Lipids                       | Stearic acid                                                        | C01530 |   |   | √ |
| M281T101 | Lipids                       | Oleic acid                                                          | C00712 | √ |   |   |
| M454T201 | Lipids                       | 1-Palmitoyl-2-hydroxy-sn-glycero-3-phosphoethanolamine              |        |   |   | √ |
| M496T196 | Lipids                       | 1-Palmitoyl-sn-glycero-3-phosphocholine                             |        |   |   | √ |
| M452T201 | Lipids                       | 1-Palmitoyl-2-hydroxy-sn-glycero-3-phosphoethanolamine              |        |   |   | √ |
| M313T158 | Lipids                       | 1-Palmitoylglycerol                                                 |        | √ |   |   |
| M343T34  | Lipids                       | 20-Hydroxyarachidonic acid                                          |        | √ |   |   |
| M330T39  | Lipids                       | Eicosapentaenoic Acid ethyl ester                                   |        |   |   | √ |
| M337T244 | Lipids                       | MG(18:2(9Z,12Z)/0:0/0:0)[rac]                                       |        |   |   | √ |
| M819T136 | Lipids                       | 2-Oleoyl-1-palmitoyl-sn-glycero-3-phosphocholine(PC(16:0/18:1(9Z))) |        | √ |   |   |
| M339T31  | Lipids                       | Norethindrone Acetate                                               |        |   |   | √ |
| M275T56  | Lipids                       | Stearidonic Acid                                                    | C00262 | √ |   |   |
| M339T402 | Lipids                       | Behenic acid                                                        | C08281 |   | √ |   |
| M253T37  | Lipids                       | cis-9-Palmitoleic acid                                              | C08362 |   | √ |   |
| M277T45  | Lipids                       | all cis-(6,9,12)-Linolenic acid                                     | C06426 |   | √ |   |
| M137T213 | Nucleic acids and derivative | Hypoxanthine                                                        | C04779 | √ |   |   |
| M324T424 | Nucleic acids and derivative | 3'-O-methylcytidine                                                 |        | √ |   |   |

|           |                              |                                      |        |   |   |   |
|-----------|------------------------------|--------------------------------------|--------|---|---|---|
| M323T423  | Nucleic acids and derivative | 5'-CMP                               |        | √ |   |   |
| M282T92   | Nucleic acids and derivative | 2'-O-methyladenosine                 | C04779 |   |   | √ |
| M152T2602 | Nucleic acids and derivative | 2-Hydroxyadenine                     |        |   | √ |   |
| M112T237  | Nucleic acids and derivative | Cytosine                             | C00380 |   | √ |   |
| M113T158  | Nucleic acids and derivative | Uracil                               | C00106 |   | √ |   |
| M113T374  | Nucleic acids and derivative | Dihydrouracil                        | C00429 |   | √ |   |
| M111T159  | Nucleic acids and derivative | Uracil                               | C00106 |   | √ |   |
| M330T253  | Nucleic acids and derivative | Adenosine 2',3'-cyclic monophosphate | C02353 |   | √ |   |
| M244T238  | Nucleic acids and derivative | Cytidine                             | C00475 |   | √ |   |
| M146T267  | Other                        | Oxyquinoline                         |        |   |   |   |
| M391T247  | Other                        | RU-0211                              |        |   |   |   |
| M301T23   | Other                        | Diosmetin                            | C00811 |   |   |   |
| M329T100  | Other                        | Acetylvalerenolic acid               |        |   |   |   |
| M128T386  | Other                        | Ammelide                             |        |   |   |   |
| M233T33   | Other                        | Confertifoline                       |        |   |   |   |
| M166T256  | Phenylpropanoids             | L-Phenylalanine                      | C00079 |   | √ |   |

|          |                      |                                                  |        |   |   |   |
|----------|----------------------|--------------------------------------------------|--------|---|---|---|
| M164T256 | Phenylpropanoids     | L-Phenylalanine                                  | C00079 |   | √ |   |
| M147T299 | Phenylpropanoids     | 4-Hydroxycinnamic acid                           | C00811 |   |   | √ |
| M565T212 | Phenylpropanoids     | Apiin                                            | C04858 |   | √ |   |
| M563T213 | Phenylpropanoids     | APIIN                                            | C04858 |   | √ |   |
| M173T181 | Plant hormone        | 3-Methylindole                                   | C05235 | √ |   |   |
| M220T117 | Plant hormone        | trans-Zeatin                                     | C00371 |   |   | √ |
| M170T258 | Plant hormone        | Indoleacrylic acid                               |        |   | √ |   |
| M87T374  | Plant hormone        | 4-Hydroxybutanoic acid lactone                   |        |   | √ |   |
| M300T432 | Sugar and derivative | N-Acetylglucosamine 1-phosphate                  |        | √ |   |   |
| M522T189 | Sugar and derivative | 1-Oleoyl-sn-glycero-3-phosphocholine             |        |   |   | √ |
| M524T192 | Sugar and derivative | 1-Stearoyl-2-hydroxy-sn-glycero-3-phosphocholine |        |   |   | √ |
| M435T243 | Sugar and derivative | 1-Oleoyl-L-.alpha.-lysophosphatidic acid         |        |   |   | √ |
| M177T105 | Sugar and derivative | L-Gulonic gamma-lactone                          | C01040 |   | √ |   |
| M198T259 | Sugar and derivative | D-Mannose                                        | C00159 |   | √ |   |
| M667T485 | Sugar and derivative | Stachyose                                        | C01613 |   | √ |   |
| M193T311 | Sugar and derivative | 2'-Deoxy-D-ribose                                | C01801 |   | √ |   |
| M147T180 | Sugar and derivative | Hydroxyacetone                                   | C05235 |   |   | √ |
| M151T228 | Sugar and derivative | Xylitol                                          | C00379 |   | √ |   |
| M757T39  | Sugar and derivative | PC(16:0/16:0)                                    | C00157 |   | √ |   |
| M173T334 | Sugar and derivative | Glycerol 3-phosphate                             | C00093 |   | √ |   |
| M759T391 | Sugar and derivative | Thioetheramide-PC                                |        |   | √ |   |
| M409T251 | Sugar and derivative | 1-Palmitoyl Lysophosphatidic Acid                |        |   |   | √ |
| M237T356 | Sugar and derivative | 2-Dehydro-3-deoxy-D-gluconate                    | C00204 |   |   | √ |

|          |          |            |        |  |   |  |
|----------|----------|------------|--------|--|---|--|
| M124T206 | Vitamins | Nicotinate | C00253 |  | √ |  |
| M122T207 | Vitamins | Nicotinate | C00253 |  | √ |  |

Table S9. Selective annotated metabolites between Wb-NE and Wb-T.

| Metabolite ID | Classification            | Description                                                         | KEGG.ID |
|---------------|---------------------------|---------------------------------------------------------------------|---------|
| M166T177      | Alkaloid                  | Hordenine                                                           | C06199  |
| M152T230      | Alkaloid                  | N-Methyltyramine                                                    |         |
| M159T178      | Amines                    | Allantoin                                                           | C01551  |
| M157T181      | Amines                    | Allantoin                                                           | C01551  |
| M177T242      | Amines                    | Serotonin                                                           | C00780  |
| M150T167      | Amines                    | Triethanolamine                                                     | C06771  |
| M116T309      | Amino acid and derivative | D-Proline                                                           | C00763  |
| M132T168      | Amino acid and derivative | L-Leucine                                                           | C00123  |
| M114T310      | Amino acid and derivative | L-Proline                                                           | C00148  |
| M120T365      | Amino acid and derivative | L-Threonine                                                         | C00188  |
| M557T304      | Amino acid and derivative | Lys-Leu                                                             |         |
| M246T403      | Amino acid and derivative | Lys-Val                                                             |         |
| M217T370      | Amino acid and derivative | N-.alpha.-Acetyl-L-arginine                                         |         |
| M191T306      | Amino acid and derivative | Thr-Ala                                                             |         |
| M233T241      | Amino acid and derivative | Thr-Leu                                                             |         |
| M267T220      | Amino acid and derivative | Thr-Phe                                                             |         |
| M330T255      | Amino acid and derivative | Tyr-Met                                                             |         |
| M298T499      | Amino acid and derivative | Val-Tyr                                                             |         |
| M219T19       | Amino acid and derivative | BHT                                                                 |         |
| M215T371      | Amino acid and derivative | N-.alpha.-Acetyl-L-arginine                                         |         |
| M187T328      | Carboxylic Acids          | Azelaic acid                                                        | C08261  |
| M136T286      | Carboxylic Acids          | Anthranilic acid (Vitamin L1)                                       | C00108  |
| M160T397      | Carboxylic Acids          | DL-2-Aminoadipic acid                                               | C00956  |
| M298T319      | Glycosides                | 1-methylguanosine                                                   |         |
| M263T342      | Lipids                    | Linoleic acid                                                       | C01595  |
| M255T45       | Lipids                    | Palmitic acid                                                       | C00249  |
| M283T44       | Lipids                    | Stearic acid                                                        | C01530  |
| M281T101      | Lipids                    | Oleic acid                                                          | C00712  |
| M454T201      | Lipids                    | 1-Palmitoyl-2-hydroxy-sn-glycero-3-phosphoethanolamine              |         |
| M496T196      | Lipids                    | 1-Palmitoyl-sn-glycero-3-phosphocholine                             |         |
| M452T201      | Lipids                    | 1-Palmitoyl-2-hydroxy-sn-glycero-3-phosphoethanolamine              |         |
| M313T158      | Lipids                    | 1-Palmitoylglycerol                                                 |         |
| M343T34       | Lipids                    | 20-Hydroxyarachidonic acid                                          |         |
| M330T39       | Lipids                    | Eicosapentaenoic Acid ethyl ester                                   |         |
| M337T244      | Lipids                    | MG(18:2(9Z,12Z)/0:0/0:0)[rac]                                       |         |
| M819T136      | Lipids                    | 2-Oleoyl-1-palmitoyl-sn-glycero-3-phosphocholine(PC(16:0/18:1(9Z))) |         |

|          |                              |                                                  |        |
|----------|------------------------------|--------------------------------------------------|--------|
| M339T31  | Lipids                       | Norethindrone Acetate                            |        |
| M275T56  | Lipids                       | Stearidonic Acid                                 | C00262 |
| M137T213 | Nucleic acids and derivative | Hypoxanthine                                     | C04779 |
| M282T92  | Nucleic acids and derivative | 2'-O-methyladenosine                             |        |
| M324T424 | Nucleic acids and derivative | 3'-O-methylecytidine                             |        |
| M323T423 | Nucleic acids and derivative | 5'-CMP                                           |        |
| M146T267 | Other                        | Oxyquinoline                                     |        |
| M391T247 | Other                        | RU-0211                                          |        |
| M301T23  | Other                        | Diosmetin                                        | C00811 |
| M147T299 | Phenylpropanoids             | 4-Hydroxycinnamic acid                           | C00371 |
| M220T117 | Plant hormone                | trans-Zeatin                                     | C08313 |
| M173T181 | Plant hormone                | 3-Methylindole                                   | C05235 |
| M147T180 | Sugar and derivative         | Hydroxyacetone                                   | C04256 |
| M300T432 | Sugar and derivative         | N-Acetylglucosamine 1-phosphate                  |        |
| M522T189 | Sugar and derivative         | 1-Oleoyl-sn-glycero-3-phosphocholine             |        |
| M524T192 | Sugar and derivative         | 1-Stearoyl-2-hydroxy-sn-glycero-3-phosphocholine |        |
| M435T243 | Sugar and derivative         | 1-Oleoyl-L-.alpha.-lysophosphatidic acid         |        |
| M409T251 | Sugar and derivative         | 1-Palmitoyl Lysophosphatidic Acid                | C00204 |
| M237T356 | Sugar and derivative         | 2-Dehydro-3-deoxy-D-gluconate                    |        |

**Table S10.** Selective annotated metabolites between Wb-T and Cb-C.

| Metabolite ID | Classification            | Description                      | KEGG.ID |
|---------------|---------------------------|----------------------------------|---------|
| M159T178      | Amines                    | Allantoin                        | C01551  |
| M177T242      | Amines                    | Serotonin                        | C00780  |
| M150T167      | Amines                    | Triethanolamine                  | C06771  |
| M100T59       | Amines                    | Cyclohexylamine                  | C00571  |
| M184T496      | Amines                    | Phosphorylcholine                | C00588  |
| M118T2722     | Amines                    | Betaine                          | C00719  |
| M136T299      | Amines                    | Dopamine                         | C03758  |
| M205T258      | Amino acid and derivative | L-Tryptophan                     | C00078  |
| M116T309      | Amino acid and derivative | D-Proline                        | C00763  |
| M148T386      | Amino acid and derivative | L-Glutamate                      | C00025  |
| M132T168      | Amino acid and derivative | L-Leucine                        | C00123  |
| M232T452      | Amino acid and derivative | N-(omega)-Hydroxyarginine        | C05933  |
| M275T439      | Amino acid and derivative | gamma-L-Glutamyl-L-glutamic acid | C05282  |
| M146T385      | Amino acid and derivative | L-Glutamate                      | C00025  |
| M130T272      | Amino acid and derivative | L-Isoleucine                     | C00407  |
| M114T310      | Amino acid and derivative | L-Proline                        | C00148  |
| M116T299      | Amino acid and derivative | L-Valine                         | C00183  |

|          |                           |                              |        |
|----------|---------------------------|------------------------------|--------|
| M130T363 | Amino acid and derivative | N-Acetyl-L-alanine           |        |
| M133T374 | Amino acid and derivative | L-Asparagine                 | C00152 |
| M182T299 | Amino acid and derivative | L-Tyrosine                   | C00082 |
| M131T374 | Amino acid and derivative | L-Asparagine                 | C00152 |
| M218T446 | Amino acid and derivative | Ala-Lys                      |        |
| M246T426 | Amino acid and derivative | Arg-Ala                      |        |
| M219T262 | Amino acid and derivative | Ser-Ile                      |        |
| M260T281 | Amino acid and derivative | Ile-Ser                      |        |
| M557T304 | Amino acid and derivative | Lys-Leu                      |        |
| M234T444 | Amino acid and derivative | Lys-Ser                      |        |
| M248T444 | Amino acid and derivative | Lys-Thr                      |        |
| M294T254 | Amino acid and derivative | Phe-Gln                      |        |
| M287T137 | Amino acid and derivative | Prilocaine                   |        |
| M187T335 | Amino acid and derivative | Pro-Ala                      |        |
| M272T415 | Amino acid and derivative | Pro-Arg                      |        |
| M207T326 | Amino acid and derivative | Ser-Thr                      |        |
| M205T286 | Amino acid and derivative | Ser-Val                      |        |
| M248T427 | Amino acid and derivative | Thr-Lys                      |        |
| M386T155 | Amino acid and derivative | Tyr-Gln                      |        |
| M246T274 | Amino acid and derivative | Val-Gln                      |        |
| M231T192 | Amino acid and derivative | Val-Ile                      |        |
| M298T499 | Amino acid and derivative | Val-Tyr                      |        |
| M217T206 | Amino acid and derivative | Val-Val                      |        |
| M219T19  | Amino acid and derivative | BHT                          |        |
| M187T328 | Carboxylic Acids          | Azelaic acid                 | C08261 |
| M129T442 | Carboxylic Acids          | Mesaconic acid               | C01732 |
| M162T398 | Carboxylic Acids          | DL-2-Aminoadipic acid        | C00956 |
| M160T397 | Carboxylic Acids          | DL-2-Aminoadipic acid        | C00956 |
| M149T31  | Carboxylic Acids          | 1,2-Benzenedicarboxylic acid |        |
| M171T268 | Carboxylic Acids          | 3-Dehydroshikimic acid       |        |
| M114T374 | Carboxylic Acids          | Maleamic acid                |        |
| M282T294 | Glycosides                | 1-Methyladenosine            | C02494 |
| M298T319 | Glycosides                | 1-methylguanosine            |        |
| M284T260 | Glycosides                | Guanosine                    | C00387 |
| M282T129 | Glycosides                | N6-methyladenosine           |        |
| M245T157 | Glycosides                | Uridine                      | C00299 |
| M282T260 | Glycosides                | Guanosine                    | C00387 |
| M257T140 | Glycosides                | Ribothymidine                |        |
| M303T158 | Glycosides                | Uridine                      | C00299 |
| M549T388 | Glycosides                | Gemcitabine                  |        |
| M336T68  | Glycosides                | Isopentenyladenosine         |        |
| M298T284 | Glycosides                | 8-hydroxy Guanosine          |        |
| M268T167 | Glycosides                | Adenosine                    | C00212 |

|           |                              |                                                        |        |
|-----------|------------------------------|--------------------------------------------------------|--------|
| M263T342  | Lipids                       | Linoleic acid                                          | C01595 |
| M283T44   | Lipids                       | Stearic acid                                           | C01530 |
| M339T402  | Lipids                       | Behenic acid                                           | C08281 |
| M452T201  | Lipids                       | 1-Palmitoyl-2-hydroxy-sn-glycero-3-phosphoethanolamine |        |
| M253T37   | Lipids                       | cis-9-Palmitoleic acid                                 | C08362 |
| M277T45   | Lipids                       | all cis-(6,9,12)-Linolenic acid                        | C06426 |
| M454T201  | Lipids                       | 1-Palmitoyl-2-hydroxy-sn-glycero-3-phosphoethanolamine |        |
| M496T196  | Lipids                       | 1-Palmitoyl-sn-glycero-3-phosphocholine                |        |
| M330T39   | Lipids                       | Eicosapentaenoic Acid ethyl ester                      |        |
| M337T244  | Lipids                       | MG(18:2(9Z,12Z)/0:0/0:0)[rac]                          |        |
| M339T31   | Lipids                       | Norethindrone Acetate                                  |        |
| M152T2602 | Nucleic acids and derivative | 2-Hydroxyadenine                                       |        |
| M112T237  | Nucleic acids and derivative | Cytosine                                               | C00380 |
| M113T158  | Nucleic acids and derivative | Uracil                                                 | C00106 |
| M113T374  | Nucleic acids and derivative | Dihydrouracil                                          | C00429 |
| M111T159  | Nucleic acids and derivative | Uracil                                                 | C00106 |
| M282T92   | Nucleic acids and derivative | 2'-O-methyladenosine                                   | C04779 |
| M330T253  | Nucleic acids and derivative | Adenosine 2',3'-cyclic monophosphate                   | C02353 |
| M244T238  | Nucleic acids and derivative | Cytidine                                               | C00475 |
| M146T267  | Other                        | Oxyquinoline                                           |        |
| M329T100  | Other                        | Acetylvalerenolic acid                                 |        |
| M391T247  | Other                        | RU-0211                                                |        |
| M128T386  | Other                        | Ammelide                                               |        |
| M233T33   | Other                        | Confertifoline                                         |        |
| M166T256  | Phenylpropanoids             | L-Phenylalanine                                        | C00079 |
| M164T256  | Phenylpropanoids             | L-Phenylalanine                                        | C00079 |
| M147T299  | Phenylpropanoids             | 4-Hydroxycinnamic acid                                 | C00811 |
| M565T212  | Phenylpropanoids             | Apiin                                                  | C04858 |
| M563T213  | Phenylpropanoids             | APIIN                                                  | C04858 |
| M220T117  | Plant hormone                | trans-Zeatin                                           | C00371 |
| M170T258  | Plant hormone                | Indoleacrylic acid                                     |        |
| M87T374   | Plant hormone                | 4-Hydroxybutanoic acid lactone                         |        |
| M177T105  | Sugar and derivative         | L-Gulonic gamma-lactone                                | C01040 |
| M198T259  | Sugar and derivative         | D-Mannose                                              | C00159 |
| M667T485  | Sugar and derivative         | Stachyose                                              | C01613 |
| M193T311  | Sugar and derivative         | 2'-Deoxy-D-ribose                                      | C01801 |
| M147T180  | Sugar and derivative         | Hydroxyacetone                                         | C05235 |
| M151T228  | Sugar and derivative         | Xylitol                                                | C00379 |
| M757T39   | Sugar and derivative         | PC(16:0/16:0)                                          | C00157 |
| M173T334  | Sugar and derivative         | Glycerol 3-phosphate                                   | C00093 |

|          |                      |                                                  |        |
|----------|----------------------|--------------------------------------------------|--------|
| M759T391 | Sugar and derivative | Thioetheramide-PC                                |        |
| M522T189 | Sugar and derivative | 1-Oleoyl-sn-glycero-3-phosphocholine             |        |
| M524T192 | Sugar and derivative | 1-Stearoyl-2-hydroxy-sn-glycero-3-phosphocholine |        |
| M435T243 | Sugar and derivative | 1-Oleoyl-L-.alpha.-lysophosphatidic acid         |        |
| M409T251 | Sugar and derivative | 1-Palmitoyl Lysophosphatidic Acid                |        |
| M237T356 | Sugar and derivative | 2-Dehydro-3-deoxy-D-gluconate                    | C00204 |
| M124T206 | Vitamins             | Nicotinate                                       | C00253 |
| M122T207 | Vitamins             | Nicotinate                                       | C00253 |

**Table S11.** Selective genes between Wb-NE and Wb-T.

| Chromosome | Start position | End position | Strand | Gene ID          | KEGG ID |
|------------|----------------|--------------|--------|------------------|---------|
| chr2H      | 14035555       | 14070479     | -      | HORVU2Hr1G006720 |         |
| chr2H      | 27503508       | 27512959     | +      | HORVU2Hr1G012860 |         |
| chr2H      | 40313666       | 40315533     | -      | HORVU2Hr1G017300 |         |
| chr2H      | 41955172       | 41958298     | +      | HORVU2Hr1G017400 |         |
| chr2H      | 62692442       | 62695537     | -      | HORVU2Hr1G021980 | K24824  |
| chr2H      | 62703527       | 62704596     | -      | HORVU2Hr1G022000 | K02895  |
| chr2H      | 64023931       | 64026621     | +      | HORVU2Hr1G022160 |         |
| chr2H      | 64030980       | 64033323     | +      | HORVU2Hr1G022180 |         |
| chr2H      | 64039579       | 64039934     | +      | HORVU2Hr1G022190 |         |
| chr2H      | 65411125       | 65417655     | +      | HORVU2Hr1G022490 |         |
| chr2H      | 65416034       | 65416931     | -      | HORVU2Hr1G022500 |         |
| chr2H      | 79714638       | 79718093     | +      | HORVU2Hr1G025530 | K01726  |
| chr2H      | 79718897       | 79719047     | -      | HORVU2Hr1G025550 | K00799  |
| chr2H      | 94192061       | 94192853     | -      | HORVU2Hr1G028080 |         |
| chr2H      | 94195785       | 94195904     | -      | ENSRNA049482530  |         |
| chr2H      | 94196295       | 94355239     | -      | HORVU2Hr1G028120 |         |
| chr2H      | 97111015       | 97114741     | -      | HORVU2Hr1G028510 | K02997  |
| chr2H      | 97111868       | 97119451     | +      | HORVU2Hr1G028520 |         |
| chr2H      | 108488405      | 108489309    | +      | HORVU2Hr1G029880 |         |
| chr2H      | 109878074      | 109878913    | +      | HORVU2Hr1G030050 |         |
| chr2H      | 114195967      | 114196191    | -      | HORVU2Hr1G030770 |         |
| chr2H      | 115538449      | 115548113    | +      | HORVU2Hr1G030930 | K11517  |
| chr2H      | 121673709      | 121686884    | +      | HORVU2Hr1G031870 |         |
| chr2H      | 124882875      | 124884558    | +      | HORVU2Hr1G032320 | K08065  |
| chr2H      | 126731735      | 126731808    | -      | ENSRNA049438045  |         |
| chr2H      | 130780008      | 130783905    | +      | HORVU2Hr1G033040 | K17795  |
| chr2H      | 137894271      | 137903719    | +      | HORVU2Hr1G034130 | K24869  |
| chr2H      | 140881095      | 140887745    | -      | HORVU2Hr1G034440 |         |

|       |           |           |   |                  |        |
|-------|-----------|-----------|---|------------------|--------|
| chr2H | 155161630 | 155169232 | + | HORVU2Hr1G035860 | K03937 |
| chr2H | 155169270 | 155170560 | - | HORVU2Hr1G035870 |        |
| chr2H | 162431269 | 162449010 | + | HORVU2Hr1G036510 |        |
| chr2H | 162999670 | 163003669 | + | HORVU2Hr1G036570 |        |
| chr2H | 432600008 | 432600090 | - | ENSRNA049483063  |        |
| chr2H | 487257573 | 487271837 | + | HORVU2Hr1G069110 |        |
| chr2H | 487261444 | 487261927 | - | HORVU2Hr1G069120 |        |
| chr2H | 487617705 | 487633705 | + | HORVU2Hr1G069270 |        |
| chr2H | 488184779 | 488190175 | - | HORVU2Hr1G069390 | K20179 |
| chr2H | 539497427 | 539500460 | - | HORVU2Hr1G074850 | K14525 |
| chr2H | 576950309 | 576959632 | + | HORVU2Hr1G079790 |        |
| chr2H | 579376827 | 579384098 | - | HORVU2Hr1G080050 |        |
| chr2H | 587891009 | 587891705 | - | HORVU2Hr1G081060 |        |
| chr2H | 587894299 | 587898426 | - | HORVU2Hr1G081080 |        |
| chr2H | 610379562 | 610383259 | - | HORVU2Hr1G084170 |        |
| chr2H | 610385517 | 610385756 | + | HORVU2Hr1G084180 |        |
| chr2H | 617536376 | 617538731 | + | HORVU2Hr1G085350 | K18172 |
| chr2H | 617540426 | 617547291 | + | HORVU2Hr1G085360 |        |
| chr2H | 617555501 | 617560124 | - | HORVU2Hr1G085370 |        |
| chr2H | 621780030 | 621783089 | + | HORVU2Hr1G086220 |        |
| chr2H | 621783477 | 621790943 | - | HORVU2Hr1G086230 |        |
| chr2H | 626231946 | 626233423 | + | HORVU2Hr1G087070 |        |
| chr2H | 626232169 | 626232678 | - | HORVU2Hr1G087080 |        |
| chr2H | 626233591 | 626237975 | - | HORVU2Hr1G087090 | K00759 |
| chr2H | 627474697 | 627479072 | - | HORVU2Hr1G087380 |        |
| chr2H | 629557364 | 629558265 | + | HORVU2Hr1G087700 |        |
| chr2H | 629559066 | 629559712 | - | HORVU2Hr1G087710 |        |
| chr2H | 647300676 | 647304039 | + | HORVU2Hr1G091200 |        |
| chr2H | 647312810 | 647317007 | + | HORVU2Hr1G091220 | K10666 |
| chr2H | 647313038 | 647322216 | - | HORVU2Hr1G091230 | K10666 |
| chr2H | 647828573 | 647831604 | + | HORVU2Hr1G091360 |        |
| chr2H | 647831678 | 647838081 | - | HORVU2Hr1G091370 | K05543 |
| chr2H | 648515999 | 648516959 | - | HORVU2Hr1G091580 |        |
| chr2H | 649203485 | 649232890 | - | HORVU2Hr1G091680 |        |
| chr2H | 663643530 | 663645270 | + | HORVU2Hr1G094190 |        |
| chr2H | 671774443 | 671776153 | - | HORVU2Hr1G095840 |        |
| chr2H | 671998367 | 672009876 | + | HORVU2Hr1G095880 |        |
| chr2H | 672009432 | 672011461 | - | HORVU2Hr1G095890 |        |
| chr2H | 677092416 | 677092610 | + | HORVU2Hr1G096900 |        |
| chr2H | 699752648 | 699757948 | - | HORVU2Hr1G103310 | K17609 |
| chr2H | 706342872 | 706346612 | - | HORVU2Hr1G105380 |        |
| chr2H | 706347266 | 706352048 | - | HORVU2Hr1G105390 |        |
| chr2H | 707265947 | 707269205 | + | HORVU2Hr1G105650 |        |

|       |           |           |   |                  |        |
|-------|-----------|-----------|---|------------------|--------|
| chr2H | 707274729 | 707277732 | + | HORVU2Hr1G105670 |        |
| chr2H | 708297044 | 708299453 | - | HORVU2Hr1G106020 |        |
| chr2H | 710833148 | 710844185 | - | HORVU2Hr1G106880 |        |
| chr2H | 714371933 | 714375104 | + | HORVU2Hr1G108480 |        |
| chr2H | 714379383 | 714385493 | - | HORVU2Hr1G108490 |        |
| chr2H | 714380655 | 714380969 | - | HORVU2Hr1G108500 |        |
| chr2H | 721943807 | 721946820 | - | HORVU2Hr1G111070 |        |
| chr2H | 723000994 | 723005790 | + | HORVU2Hr1G111530 |        |
| chr2H | 725464044 | 725470901 | + | HORVU2Hr1G112260 | K00327 |
| chr2H | 725822715 | 725826075 | - | HORVU2Hr1G112480 |        |
| chr2H | 731175559 | 731178336 | - | HORVU2Hr1G114190 |        |
| chr2H | 732688460 | 732690886 | - | HORVU2Hr1G114610 | K19730 |
| chr2H | 732691119 | 732698865 | + | HORVU2Hr1G114640 | K13998 |
| chr2H | 735306656 | 735309864 | + | HORVU2Hr1G115710 |        |
| chr2H | 739142706 | 739147950 | - | HORVU2Hr1G116910 |        |
| chr2H | 741642130 | 741643459 | + | HORVU2Hr1G118100 |        |
| chr2H | 742162324 | 742163148 | + | HORVU2Hr1G118290 | K16616 |
| chr2H | 742197934 | 742204374 | + | HORVU2Hr1G118320 |        |
| chr2H | 742206222 | 742207877 | - | HORVU2Hr1G118340 |        |
| chr2H | 750522486 | 750525536 | + | HORVU2Hr1G121020 |        |
| chr2H | 750530898 | 750537187 | + | HORVU2Hr1G121030 |        |
| chr2H | 765910275 | 765917856 | + | HORVU2Hr1G127090 |        |
| chr2H | 765910275 | 765919163 | - | HORVU2Hr1G127100 |        |
| chr3H | 3242648   | 3407139   | + | HORVU3Hr1G001430 |        |
| chr3H | 3252999   | 3253070   | + | ENSRNA049437470  |        |
| chr3H | 24938037  | 24942947  | + | HORVU3Hr1G011540 | K23871 |
| chr3H | 26934253  | 26955710  | + | HORVU3Hr1G012410 |        |
| chr3H | 26959609  | 26961034  | + | HORVU3Hr1G012420 | K15322 |
| chr3H | 26967175  | 26968718  | - | HORVU3Hr1G012430 |        |
| chr3H | 46958934  | 46961758  | + | HORVU3Hr1G018110 | K17508 |
| chr3H | 57786136  | 57791992  | + | HORVU3Hr1G019790 | K00029 |
| chr3H | 57860355  | 57863598  | - | HORVU3Hr1G019840 |        |
| chr3H | 66838733  | 66851154  | + | HORVU3Hr1G021080 |        |
| chr3H | 66851391  | 66851461  | - | ENSRNA049434451  |        |
| chr3H | 68834975  | 68838931  | + | HORVU3Hr1G021310 |        |
| chr3H | 68842852  | 68843934  | + | HORVU3Hr1G021320 |        |
| chr3H | 82253055  | 82262374  | - | HORVU3Hr1G022770 | K00837 |
| chr3H | 86458896  | 86459282  | + | HORVU3Hr1G023380 |        |
| chr3H | 86464715  | 86466871  | + | HORVU3Hr1G023390 |        |
| chr3H | 86467302  | 86469633  | + | HORVU3Hr1G023400 | K13496 |
| chr3H | 86470238  | 86470507  | + | HORVU3Hr1G023410 |        |
| chr3H | 95271594  | 95276163  | - | HORVU3Hr1G024530 | K01115 |
| chr3H | 98779822  | 98788847  | - | HORVU3Hr1G024990 |        |

|       |           |           |   |                  |        |
|-------|-----------|-----------|---|------------------|--------|
| chr3H | 103084771 | 103088991 | + | HORVU3Hr1G025920 |        |
| chr3H | 120578160 | 120581861 | + | HORVU3Hr1G027760 |        |
| chr3H | 134490014 | 134493168 | - | HORVU3Hr1G029260 |        |
| chr3H | 134969489 | 134976262 | - | HORVU3Hr1G029340 |        |
| chr3H | 135042403 | 135047265 | - | HORVU3Hr1G029350 | K07198 |
| chr3H | 135042439 | 135043641 | + | HORVU3Hr1G029360 |        |
| chr3H | 135048197 | 135052830 | - | HORVU3Hr1G029370 |        |
| chr3H | 140890689 | 140900652 | + | HORVU3Hr1G030010 |        |
| chr3H | 140897671 | 140901526 | - | HORVU3Hr1G030020 |        |
| chr3H | 175380429 | 175384468 | + | HORVU3Hr1G033430 | K18417 |
| chr3H | 175384784 | 175388226 | - | HORVU3Hr1G033440 |        |
| chr3H | 175389167 | 175397886 | - | HORVU3Hr1G033450 | K10406 |
| chr3H | 177845781 | 177854317 | + | HORVU3Hr1G033700 |        |
| chr3H | 182123991 | 182130284 | + | HORVU3Hr1G033920 | K00031 |
| chr3H | 182129348 | 182135814 | - | HORVU3Hr1G033930 |        |
| chr3H | 182278276 | 182279474 | + | HORVU3Hr1G033950 |        |
| chr3H | 183306618 | 183309396 | + | HORVU3Hr1G034040 |        |
| chr3H | 183313528 | 183314125 | - | HORVU3Hr1G034050 |        |
| chr3H | 186947109 | 186951309 | - | HORVU3Hr1G034440 | K00924 |
| chr3H | 188607093 | 188608685 | - | HORVU3Hr1G034640 |        |
| chr3H | 197437297 | 197446030 | + | HORVU3Hr1G035420 |        |
| chr3H | 198160791 | 198175649 | - | HORVU3Hr1G035590 |        |
| chr3H | 205145726 | 205150621 | + | HORVU3Hr1G036310 |        |
| chr3H | 231376289 | 231384751 | + | HORVU3Hr1G039220 | K00873 |
| chr3H | 231377594 | 231384772 | - | HORVU3Hr1G039230 | K00873 |
| chr3H | 231388264 | 231388873 | - | HORVU3Hr1G039240 |        |
| chr3H | 235267245 | 235286946 | - | HORVU3Hr1G039600 | K18460 |
| chr3H | 238598524 | 238601525 | + | HORVU3Hr1G039930 | K04035 |
| chr3H | 244048158 | 244055241 | + | HORVU3Hr1G040350 | K17301 |
| chr3H | 259759283 | 259761294 | + | HORVU3Hr1G041520 |        |
| chr3H | 261009541 | 261028057 | + | HORVU3Hr1G041810 |        |
| chr3H | 261022546 | 261028057 | - | HORVU3Hr1G041820 | K13436 |
| chr3H | 268906906 | 268955150 | - | HORVU3Hr1G042330 |        |
| chr3H | 270264122 | 270269601 | + | HORVU3Hr1G042540 | K11000 |
| chr3H | 280495354 | 280501135 | + | HORVU3Hr1G043510 | K08592 |
| chr3H | 438233271 | 438235842 | + | HORVU3Hr1G058150 |        |
| chr3H | 470477288 | 470480401 | + | HORVU3Hr1G061790 | K10580 |
| chr3H | 470539593 | 470583534 | + | HORVU3Hr1G061800 |        |
| chr3H | 474423476 | 474428164 | - | HORVU3Hr1G062130 | K20869 |
| chr3H | 476380758 | 476388549 | - | HORVU3Hr1G062370 |        |
| chr3H | 476389377 | 476389965 | - | HORVU3Hr1G062390 |        |
| chr3H | 479976250 | 479983057 | - | HORVU3Hr1G062740 |        |
| chr3H | 479983413 | 480017371 | - | HORVU3Hr1G062760 |        |

|       |           |           |   |                  |        |
|-------|-----------|-----------|---|------------------|--------|
| chr3H | 511310492 | 511321405 | + | HORVU3Hr1G067300 |        |
| chr3H | 518532518 | 518534806 | - | HORVU3Hr1G068400 |        |
| chr3H | 520311285 | 520315332 | - | HORVU3Hr1G068700 |        |
| chr3H | 530321347 | 530325450 | - | HORVU3Hr1G070040 |        |
| chr3H | 530324742 | 530329449 | + | HORVU3Hr1G070050 | K05954 |
| chr3H | 538802945 | 538807675 | - | HORVU3Hr1G071240 |        |
| chr3H | 541043012 | 541050693 | + | HORVU3Hr1G071550 | K09419 |
| chr3H | 541485968 | 541492933 | + | HORVU3Hr1G071570 | K16055 |
| chr3H | 552738456 | 552750250 | + | HORVU3Hr1G073220 |        |
| chr3H | 555470279 | 555480914 | - | HORVU3Hr1G073790 |        |
| chr3H | 555555698 | 555559733 | - | HORVU3Hr1G073800 |        |
| chr3H | 559879827 | 559884486 | + | HORVU3Hr1G074800 | K03644 |
| chr3H | 574886154 | 574890042 | + | HORVU3Hr1G077780 |        |
| chr3H | 576162439 | 576169103 | - | HORVU3Hr1G078110 | K10695 |
| chr3H | 582534472 | 582542774 | + | HORVU3Hr1G079270 | K00109 |
| chr3H | 597391061 | 597393409 | - | HORVU3Hr1G082030 |        |
| chr3H | 598334946 | 598337882 | + | HORVU3Hr1G082230 | K22733 |
| chr3H | 598337922 | 598346861 | - | HORVU3Hr1G082240 |        |
| chr3H | 611776668 | 611781499 | + | HORVU3Hr1G085280 | K00967 |
| chr3H | 616206893 | 616210388 | + | HORVU3Hr1G086200 | K05909 |
| chr3H | 616215859 | 616219980 | - | HORVU3Hr1G086210 |        |
| chr3H | 619313438 | 619316091 | - | HORVU3Hr1G086930 | K02957 |
| chr3H | 620456651 | 620458731 | + | HORVU3Hr1G087180 |        |
| chr3H | 654228674 | 654232763 | + | HORVU3Hr1G096710 |        |
| chr3H | 654496084 | 654499747 | + | HORVU3Hr1G096780 |        |
| chr3H | 654881439 | 654883221 | - | HORVU3Hr1G097000 |        |
| chr3H | 654885248 | 654889252 | - | HORVU3Hr1G097010 | K01188 |
| chr3H | 654891181 | 654892689 | + | HORVU3Hr1G097030 |        |
| chr3H | 660840084 | 660849791 | + | HORVU3Hr1G099120 | K13430 |
| chr3H | 660840235 | 660849784 | - | HORVU3Hr1G099130 | K13430 |
| chr3H | 670194785 | 670197235 | - | HORVU3Hr1G105870 |        |
| chr3H | 673750478 | 673751897 | + | HORVU3Hr1G107910 |        |
| chr3H | 673755306 | 673761742 | + | HORVU3Hr1G107920 |        |
| chr3H | 688839243 | 688844859 | + | HORVU3Hr1G113640 |        |
| chr3H | 688850191 | 688852300 | + | HORVU3Hr1G113650 |        |
| chr3H | 688853248 | 688854537 | - | HORVU3Hr1G113660 |        |
| chr3H | 688952163 | 688952246 | - | ENSRNA049436778  |        |
| chr3H | 688954217 | 688954300 | - | ENSRNA049436790  |        |
| chr3H | 688959593 | 688959676 | - | ENSRNA049436800  |        |
| chr3H | 688959786 | 688967856 | - | HORVU3Hr1G113720 |        |
| chr3H | 688963885 | 688964552 | + | HORVU3Hr1G113730 |        |
| chr3H | 690416248 | 690421349 | - | HORVU3Hr1G114240 |        |
| chr3H | 690418017 | 690418964 | + | HORVU3Hr1G114250 |        |

|       |           |           |   |                  |        |
|-------|-----------|-----------|---|------------------|--------|
| chr3H | 690680636 | 690689148 | + | HORVU3Hr1G114310 | K04498 |
| chr5H | 20455220  | 20455874  | + | HORVU5Hr1G009020 |        |
| chr5H | 38555667  | 38562124  | + | HORVU5Hr1G012770 | K00547 |
| chr5H | 38557723  | 38562136  | - | HORVU5Hr1G012780 | K00547 |
| chr5H | 71837213  | 71844074  | - | HORVU5Hr1G018040 |        |
| chr5H | 160187107 | 160247758 | - | HORVU5Hr1G027830 |        |
| chr5H | 193052889 | 193074651 | + | HORVU5Hr1G030970 |        |
| chr5H | 193054074 | 193054505 | - | HORVU5Hr1G030980 |        |
| chr5H | 193062941 | 193063135 | - | HORVU5Hr1G031010 |        |
| chr5H | 220744391 | 220744960 | - | HORVU5Hr1G033240 |        |
| chr5H | 231082080 | 231113023 | - | HORVU5Hr1G034400 |        |
| chr5H | 231086676 | 231087259 | + | HORVU5Hr1G034420 |        |
| chr5H | 231087953 | 231088333 | + | HORVU5Hr1G034430 |        |
| chr5H | 231088786 | 231089365 | + | HORVU5Hr1G034440 |        |
| chr5H | 255509706 | 255512098 | - | HORVU5Hr1G036250 | K02155 |
| chr5H | 256600980 | 256606500 | + | HORVU5Hr1G036360 |        |
| chr5H | 257988740 | 257995792 | - | HORVU5Hr1G036460 | K01897 |
| chr5H | 270203770 | 270207437 | - | HORVU5Hr1G037600 | K03686 |
| chr5H | 280775389 | 280777976 | + | HORVU5Hr1G038920 | K02997 |
| chr5H | 286690669 | 286711619 | + | HORVU5Hr1G039430 |        |
| chr5H | 288433498 | 288439832 | + | HORVU5Hr1G039620 |        |
| chr5H | 290716942 | 290720528 | + | HORVU5Hr1G039850 | K10355 |
| chr5H | 293329487 | 293336347 | + | HORVU5Hr1G040040 |        |
| chr5H | 293476239 | 293476827 | + | HORVU5Hr1G040080 |        |
| chr5H | 308435568 | 308435744 | - | HORVU5Hr1G041040 |        |
| chr5H | 359517904 | 359532721 | - | HORVU5Hr1G046250 |        |
| chr5H | 359527202 | 359529307 | + | HORVU5Hr1G046260 |        |
| chr5H | 359535548 | 359536767 | - | HORVU5Hr1G046280 |        |
| chr5H | 363428454 | 363429949 | - | HORVU5Hr1G046850 |        |
| chr5H | 363433374 | 363438316 | + | HORVU5Hr1G046860 |        |
| chr5H | 373446467 | 373455729 | + | HORVU5Hr1G048070 | K01953 |
| chr5H | 373450820 | 373456880 | - | HORVU5Hr1G048100 |        |
| chr5H | 376919025 | 377036656 | + | HORVU5Hr1G048660 |        |
| chr5H | 440157127 | 440167130 | - | HORVU5Hr1G056280 |        |
| chr5H | 441631409 | 441633105 | + | HORVU5Hr1G056380 |        |
| chr5H | 441635331 | 441639155 | + | HORVU5Hr1G056390 | K01792 |
| chr5H | 441639539 | 441643067 | - | HORVU5Hr1G056400 |        |
| chr5H | 480973094 | 480984107 | + | HORVU5Hr1G061530 |        |
| chr5H | 519242296 | 519242487 | - | HORVU5Hr1G068670 |        |
| chr5H | 519246409 | 519246624 | + | HORVU5Hr1G068680 |        |
| chr5H | 519247291 | 519247497 | + | HORVU5Hr1G068700 |        |
| chr5H | 520429673 | 520434263 | + | HORVU5Hr1G069050 |        |
| chr5H | 533642537 | 533643952 | + | HORVU5Hr1G071720 |        |

|       |           |           |   |                  |        |
|-------|-----------|-----------|---|------------------|--------|
| chr5H | 540583851 | 540586087 | + | HORVU5Hr1G073680 | K12836 |
| chr5H | 540586729 | 540590466 | + | HORVU5Hr1G073690 |        |
| chr5H | 540599752 | 540600513 | + | HORVU5Hr1G073700 |        |
| chr5H | 541383545 | 541385735 | - | HORVU5Hr1G073950 |        |
| chr5H | 542981416 | 542984571 | + | HORVU5Hr1G074340 |        |
| chr5H | 542981815 | 542991490 | - | HORVU5Hr1G074350 |        |
| chr5H | 546258332 | 546260686 | - | HORVU5Hr1G075200 |        |
| chr5H | 547114171 | 547116264 | + | HORVU5Hr1G075420 | K02912 |
| chr5H | 549517615 | 549520630 | - | HORVU5Hr1G076120 | K13947 |
| chr5H | 549527020 | 549530983 | + | HORVU5Hr1G076130 |        |
| chr5H | 552951563 | 552952213 | - | HORVU5Hr1G077170 |        |
| chr5H | 552963033 | 552970060 | - | HORVU5Hr1G077190 |        |
| chr5H | 552970957 | 552978011 | - | HORVU5Hr1G077200 | K00162 |
| chr5H | 566073813 | 566077051 | - | HORVU5Hr1G082010 |        |
| chr5H | 566073828 | 566074100 | + | HORVU5Hr1G082020 |        |
| chr5H | 568196281 | 568199026 | - | HORVU5Hr1G082680 |        |
| chr5H | 568255238 | 568258790 | - | HORVU5Hr1G082700 |        |
| chr5H | 569819567 | 569822936 | - | HORVU5Hr1G083310 |        |
| chr5H | 574614503 | 574619304 | + | HORVU5Hr1G085320 | K10875 |
| chr5H | 574625123 | 574631196 | - | HORVU5Hr1G085330 |        |
| chr5H | 587901515 | 587907220 | - | HORVU5Hr1G092250 |        |
| chr5H | 589575141 | 589583643 | + | HORVU5Hr1G092840 | K03010 |
| chr5H | 590853571 | 590854869 | + | HORVU5Hr1G093190 |        |
| chr5H | 590856159 | 590860165 | - | HORVU5Hr1G093210 | K20818 |
| chr5H | 592408069 | 592409479 | + | HORVU5Hr1G093640 | K14484 |
| chr5H | 592411406 | 592420140 | - | HORVU5Hr1G093650 | K03116 |
| chr5H | 592424716 | 592426560 | - | HORVU5Hr1G093660 |        |
| chr5H | 592515276 | 592521098 | - | HORVU5Hr1G093720 | K16277 |
| chr5H | 592524226 | 592525113 | + | HORVU5Hr1G093730 |        |
| chr5H | 595570698 | 595574227 | - | HORVU5Hr1G094430 | K01534 |
| chr5H | 612296412 | 612298786 | - | HORVU5Hr1G101010 |        |
| chr5H | 612299923 | 612302632 | - | HORVU5Hr1G101020 | K01807 |
| chr5H | 620734634 | 620739948 | + | HORVU5Hr1G105040 | K15407 |
| chr5H | 623058746 | 623061089 | - | HORVU5Hr1G105970 | K14553 |
| chr5H | 623061300 | 623067793 | + | HORVU5Hr1G105980 |        |
| chr5H | 626650157 | 626657447 | + | HORVU5Hr1G107360 |        |
| chr5H | 629282149 | 629287350 | + | HORVU5Hr1G109160 |        |
| chr5H | 629289966 | 629290184 | - | ENSRNA049478581  |        |
| chr5H | 629291325 | 629291544 | - | ENSRNA049478578  |        |
| chr5H | 629295132 | 629296380 | + | HORVU5Hr1G109190 |        |
| chr5H | 630038180 | 630039815 | + | HORVU5Hr1G109450 | K11251 |
| chr5H | 630039071 | 630039937 | - | HORVU5Hr1G109460 | K11251 |
| chr5H | 630049593 | 630057341 | + | HORVU5Hr1G109470 |        |

|       |           |           |   |                  |        |
|-------|-----------|-----------|---|------------------|--------|
| chr5H | 630712092 | 630713548 | - | HORVU5Hr1G109710 | K02692 |
| chr5H | 630778643 | 630784838 | - | HORVU5Hr1G109720 | K09613 |
| chr5H | 630787393 | 630789598 | + | HORVU5Hr1G109730 |        |
| chr5H | 631251083 | 631252934 | - | HORVU5Hr1G109910 |        |
| chr5H | 631585522 | 631592253 | - | HORVU5Hr1G110000 | K10999 |
| chr5H | 632089832 | 632091949 | - | HORVU5Hr1G110170 |        |
| chr5H | 632292884 | 632293044 | + | ENSRNA049480406  |        |
| chr5H | 632292896 | 632293152 | + | HORVU5Hr1G110270 |        |
| chr5H | 632293956 | 632302971 | - | HORVU5Hr1G110280 | K17508 |
| chr5H | 632383586 | 632386920 | + | HORVU5Hr1G110330 | K02737 |
| chr5H | 632390004 | 632399276 | - | HORVU5Hr1G110340 | K03357 |
| chr5H | 632392604 | 632393119 | - | HORVU5Hr1G110350 | K03357 |
| chr5H | 636383933 | 636384036 | + | ENSRNA049480398  |        |
| chr5H | 636675899 | 636680290 | + | HORVU5Hr1G111540 | K14945 |
| chr5H | 636814022 | 636816516 | + | HORVU5Hr1G111640 | K02879 |
| chr5H | 636816684 | 636816767 | + | ENSRNA049443512  |        |
| chr5H | 638459130 | 638478382 | - | HORVU5Hr1G112210 |        |
| chr5H | 644817652 | 644820205 | + | HORVU5Hr1G114840 |        |
| chr5H | 645045171 | 645052413 | + | HORVU5Hr1G114910 |        |
| chr5H | 645429217 | 645433078 | + | HORVU5Hr1G115010 |        |
| chr5H | 645433637 | 645438458 | + | HORVU5Hr1G115030 |        |
| chr5H | 646848440 | 646853969 | + | HORVU5Hr1G115530 |        |
| chr5H | 651473577 | 651473823 | + | HORVU5Hr1G117890 |        |
| chr5H | 651481517 | 651485571 | + | HORVU5Hr1G117900 | K10355 |
| chr5H | 652964039 | 652967879 | + | HORVU5Hr1G118460 |        |
| chr5H | 652968576 | 652968647 | + | ENSRNA049443432  |        |
| chr5H | 652969084 | 652974847 | - | HORVU5Hr1G118480 |        |
| chr5H | 654684138 | 654689663 | - | HORVU5Hr1G119060 |        |
| chr5H | 655883016 | 655884783 | + | HORVU5Hr1G119500 |        |
| chr5H | 655885659 | 655888626 | - | HORVU5Hr1G119510 |        |
| chr5H | 655899900 | 656067721 | - | HORVU5Hr1G119520 |        |
| chr5H | 656651812 | 656654121 | - | HORVU5Hr1G119810 |        |
| chr5H | 657712172 | 657727609 | - | HORVU5Hr1G120480 |        |
| chr5H | 659415973 | 659422455 | + | HORVU5Hr1G121310 |        |
| chr5H | 663388588 | 663390379 | - | HORVU5Hr1G123120 |        |
| chr5H | 663395230 | 663397277 | - | HORVU5Hr1G123150 |        |
| chr5H | 663397690 | 663402446 | - | HORVU5Hr1G123160 | K13989 |
| chr5H | 668242695 | 668244938 | + | HORVU5Hr1G125190 |        |
| chr5H | 668250315 | 668252666 | + | HORVU5Hr1G125200 | K06269 |
| chr5H | 668262529 | 668266358 | - | HORVU5Hr1G125220 |        |
| chr7H | 3419740   | 3423227   | + | HORVU7Hr1G001560 | K22139 |
| chr7H | 3430922   | 3433264   | - | HORVU7Hr1G001570 |        |
| chr7H | 4055831   | 4058258   | + | HORVU7Hr1G002060 | K02940 |

|       |          |          |   |                  |        |
|-------|----------|----------|---|------------------|--------|
| chr7H | 4278136  | 4283136  | + | HORVU7Hr1G002200 | K02641 |
| chr7H | 4279678  | 4283236  | - | HORVU7Hr1G002210 | K02641 |
| chr7H | 4657357  | 4658776  | - | HORVU7Hr1G002440 |        |
| chr7H | 4659281  | 4663257  | - | HORVU7Hr1G002450 |        |
| chr7H | 24723050 | 24724705 | + | HORVU7Hr1G018530 | K00430 |
| chr7H | 26195337 | 26195407 | + | ENSRNA049442277  |        |
| chr7H | 26196461 | 26208756 | - | HORVU7Hr1G019550 |        |
| chr7H | 27958533 | 28145362 | + | HORVU7Hr1G020660 |        |
| chr7H | 30203510 | 30205049 | - | HORVU7Hr1G021320 |        |
| chr7H | 30207753 | 30213665 | + | HORVU7Hr1G021340 |        |
| chr7H | 31744977 | 31749786 | + | HORVU7Hr1G021980 |        |
| chr7H | 32641735 | 32644162 | - | HORVU7Hr1G022310 |        |
| chr7H | 32659079 | 32660072 | - | HORVU7Hr1G022330 |        |
| chr7H | 34396250 | 34402461 | + | HORVU7Hr1G022910 |        |
| chr7H | 34424780 | 34430943 | - | HORVU7Hr1G022940 |        |
| chr7H | 34432709 | 34435123 | - | HORVU7Hr1G022970 | K02737 |
| chr7H | 34436857 | 34440982 | - | HORVU7Hr1G022980 |        |
| chr7H | 34771324 | 34773069 | - | HORVU7Hr1G023060 |        |
| chr7H | 34773076 | 34777739 | + | HORVU7Hr1G023070 |        |
| chr7H | 34796990 | 34945086 | - | HORVU7Hr1G023100 |        |
| chr7H | 34820156 | 34822028 | - | HORVU7Hr1G023140 |        |
| chr7H | 34826121 | 34839822 | + | HORVU7Hr1G023150 |        |
| chr7H | 38049222 | 38051414 | + | HORVU7Hr1G024100 |        |
| chr7H | 40734383 | 40737494 | - | HORVU7Hr1G024890 | K14566 |
| chr7H | 41832522 | 41834863 | - | HORVU7Hr1G025380 |        |
| chr7H | 41834939 | 41841912 | - | HORVU7Hr1G025390 |        |
| chr7H | 41843877 | 41845648 | - | HORVU7Hr1G025400 |        |
| chr7H | 42673891 | 42673962 | + | ENSRNA049442250  |        |
| chr7H | 42674384 | 42674455 | + | ENSRNA049442241  |        |
| chr7H | 42684121 | 42690645 | - | HORVU7Hr1G025620 |        |
| chr7H | 42957041 | 42958811 | - | HORVU7Hr1G025720 | K09422 |
| chr7H | 42960311 | 42964316 | + | HORVU7Hr1G025730 | K24418 |
| chr7H | 44222056 | 44227665 | + | HORVU7Hr1G025990 |        |
| chr7H | 44237192 | 44240267 | + | HORVU7Hr1G026000 |        |
| chr7H | 44239049 | 44242739 | - | HORVU7Hr1G026020 |        |
| chr7H | 45701766 | 45710711 | - | HORVU7Hr1G026430 |        |
| chr7H | 47595794 | 47598767 | - | HORVU7Hr1G027010 |        |
| chr7H | 50176082 | 50176275 | + | ENSRNA049488590  |        |
| chr7H | 50177527 | 50178703 | + | HORVU7Hr1G028070 |        |
| chr7H | 50182341 | 50182536 | + | ENSRNA049488586  |        |
| chr7H | 50183680 | 50184306 | - | HORVU7Hr1G028080 |        |
| chr7H | 50185054 | 50185249 | + | ENSRNA049488589  |        |
| chr7H | 51814370 | 51817043 | - | HORVU7Hr1G028370 |        |

|       |           |           |   |                  |        |
|-------|-----------|-----------|---|------------------|--------|
| chr7H | 58171206  | 58178764  | + | HORVU7Hr1G030040 |        |
| chr7H | 58178807  | 58183475  | - | HORVU7Hr1G030050 |        |
| chr7H | 62540594  | 62540770  | + | HORVU7Hr1G030990 |        |
| chr7H | 62540774  | 62541217  | + | HORVU7Hr1G031000 |        |
| chr7H | 62541536  | 62541691  | + | HORVU7Hr1G031010 |        |
| chr7H | 62553494  | 62559649  | + | HORVU7Hr1G031020 |        |
| chr7H | 62744251  | 62752110  | + | HORVU7Hr1G031100 | K14311 |
| chr7H | 69927208  | 69928231  | + | HORVU7Hr1G033780 | K03841 |
| chr7H | 69932081  | 69940038  | - | HORVU7Hr1G033820 |        |
| chr7H | 85850542  | 85854380  | + | HORVU7Hr1G036660 |        |
| chr7H | 89778600  | 89780563  | + | HORVU7Hr1G037410 |        |
| chr7H | 90402643  | 90406306  | - | HORVU7Hr1G037470 |        |
| chr7H | 90403030  | 90405049  | + | HORVU7Hr1G037480 |        |
| chr7H | 90406533  | 90414581  | - | HORVU7Hr1G037510 |        |
| chr7H | 90574611  | 90578805  | - | HORVU7Hr1G037550 | K15032 |
| chr7H | 109373213 | 109374520 | - | HORVU7Hr1G040370 | K08912 |
| chr7H | 109380119 | 109381636 | - | HORVU7Hr1G040380 |        |
| chr7H | 109382547 | 109389554 | - | HORVU7Hr1G040390 |        |
| chr7H | 144284135 | 144291911 | + | HORVU7Hr1G045550 |        |
| chr7H | 144289836 | 144293353 | - | HORVU7Hr1G045580 |        |
| chr7H | 146582057 | 146582296 | - | HORVU7Hr1G045750 |        |
| chr7H | 146585894 | 146590335 | + | HORVU7Hr1G045770 | K16732 |
| chr7H | 149875814 | 149879925 | + | HORVU7Hr1G046250 | K01188 |
| chr7H | 149880190 | 149883832 | - | HORVU7Hr1G046270 |        |
| chr7H | 149883969 | 149885304 | + | HORVU7Hr1G046280 |        |
| chr7H | 150238886 | 150248647 | + | HORVU7Hr1G046290 |        |
| chr7H | 154200185 | 154200457 | - | HORVU7Hr1G046790 |        |
| chr7H | 154201749 | 154203538 | - | HORVU7Hr1G046800 |        |
| chr7H | 154203905 | 154205840 | - | HORVU7Hr1G046820 | K21483 |
| chr7H | 154206334 | 154207469 | - | HORVU7Hr1G046830 |        |
| chr7H | 156144132 | 156151763 | + | HORVU7Hr1G047020 | K18749 |
| chr7H | 159155959 | 159169545 | + | HORVU7Hr1G047420 |        |
| chr7H | 159165280 | 159165582 | - | HORVU7Hr1G047430 |        |
| chr7H | 159465068 | 159468935 | - | HORVU7Hr1G047500 |        |
| chr7H | 161416110 | 161417025 | - | HORVU7Hr1G047780 |        |
| chr7H | 161419405 | 161421513 | - | HORVU7Hr1G047790 |        |
| chr7H | 162957742 | 162969327 | - | HORVU7Hr1G047980 |        |
| chr7H | 162972005 | 162982693 | - | HORVU7Hr1G047990 |        |
| chr7H | 162983078 | 162983380 | + | HORVU7Hr1G048000 | K03878 |
| chr7H | 163191173 | 163195598 | + | HORVU7Hr1G048040 |        |
| chr7H | 164006021 | 164011620 | - | HORVU7Hr1G048120 |        |
| chr7H | 164864300 | 164884445 | + | HORVU7Hr1G048330 |        |
| chr7H | 171722329 | 171736691 | - | HORVU7Hr1G049220 |        |

|       |           |           |   |                  |        |
|-------|-----------|-----------|---|------------------|--------|
| chr7H | 171726034 | 171726321 | - | HORVU7Hr1G049230 |        |
| chr7H | 172195118 | 172199921 | - | HORVU7Hr1G049240 | K03327 |
| chr7H | 173367734 | 173374639 | + | HORVU7Hr1G049400 | K14724 |
| chr7H | 173376233 | 173376772 | - | HORVU7Hr1G049420 |        |
| chr7H | 180596856 | 180615545 | + | HORVU7Hr1G050300 |        |
| chr7H | 180865508 | 180866625 | + | HORVU7Hr1G050340 |        |
| chr7H | 182986551 | 182987664 | - | HORVU7Hr1G050540 |        |
| chr7H | 185963320 | 185966560 | - | HORVU7Hr1G050740 |        |
| chr7H | 187439604 | 187448519 | - | HORVU7Hr1G050880 |        |
| chr7H | 188001870 | 188003539 | + | HORVU7Hr1G050950 | K22378 |
| chr7H | 189799612 | 189803487 | + | HORVU7Hr1G051070 | K14677 |
| chr7H | 190708379 | 190711713 | + | HORVU7Hr1G051140 | K05956 |
| chr7H | 190712096 | 190716193 | - | HORVU7Hr1G051150 |        |
| chr7H | 192879289 | 192885430 | - | HORVU7Hr1G051400 |        |
| chr7H | 193865646 | 193872026 | + | HORVU7Hr1G051550 |        |
| chr7H | 193865675 | 193872300 | - | HORVU7Hr1G051560 |        |
| chr7H | 194166695 | 194170342 | - | HORVU7Hr1G051570 | K00434 |
| chr7H | 194170650 | 194172694 | - | HORVU7Hr1G051580 |        |
| chr7H | 195559671 | 195560519 | - | HORVU7Hr1G051740 | K09422 |
| chr7H | 195560821 | 195569574 | - | HORVU7Hr1G051750 |        |
| chr7H | 195561676 | 195564596 | + | HORVU7Hr1G051760 | K01214 |
| chr7H | 195566397 | 195567259 | - | HORVU7Hr1G051770 |        |
| chr7H | 196771438 | 196779677 | - | HORVU7Hr1G051930 |        |
| chr7H | 197645209 | 197649451 | + | HORVU7Hr1G052060 |        |
| chr7H | 197645407 | 197650059 | - | HORVU7Hr1G052070 |        |
| chr7H | 197650488 | 197655955 | - | HORVU7Hr1G052090 |        |
| chr7H | 198245435 | 198252919 | - | HORVU7Hr1G052190 |        |
| chr7H | 200511571 | 200514820 | - | HORVU7Hr1G052520 |        |
| chr7H | 200516181 | 200519231 | - | HORVU7Hr1G052530 | K22857 |
| chr7H | 201214148 | 201216151 | + | HORVU7Hr1G052580 |        |
| chr7H | 202232707 | 202236187 | + | HORVU7Hr1G052720 | K12272 |
| chr7H | 202238220 | 202239207 | - | HORVU7Hr1G052730 |        |
| chr7H | 203224790 | 203227407 | - | HORVU7Hr1G052800 |        |
| chr7H | 206624036 | 206628806 | - | HORVU7Hr1G053170 | K09571 |
| chr7H | 206628334 | 206628591 | + | HORVU7Hr1G053180 |        |
| chr7H | 207066666 | 207071314 | + | HORVU7Hr1G053230 |        |
| chr7H | 208489726 | 208501010 | - | HORVU7Hr1G053310 |        |
| chr7H | 208495957 | 208496570 | - | HORVU7Hr1G053320 |        |
| chr7H | 208499001 | 208499183 | - | HORVU7Hr1G053350 |        |
| chr7H | 208499718 | 208499948 | - | HORVU7Hr1G053360 |        |
| chr7H | 209107148 | 209116437 | - | HORVU7Hr1G053440 |        |
| chr7H | 213013811 | 213019782 | + | HORVU7Hr1G053940 |        |
| chr7H | 217284728 | 217287615 | + | HORVU7Hr1G054440 |        |

|       |           |           |   |                  |        |
|-------|-----------|-----------|---|------------------|--------|
| chr7H | 217288945 | 217289820 | - | HORVU7Hr1G054460 |        |
| chr7H | 221347389 | 221350163 | - | HORVU7Hr1G054670 | K02936 |
| chr7H | 221602866 | 221606903 | - | HORVU7Hr1G054690 |        |
| chr7H | 234654877 | 234669226 | - | HORVU7Hr1G056410 |        |
| chr7H | 234665154 | 234712484 | + | HORVU7Hr1G056420 |        |
| chr7H | 235074749 | 235077901 | + | HORVU7Hr1G056450 |        |
| chr7H | 235075668 | 235080845 | - | HORVU7Hr1G056460 | K15191 |
| chr7H | 235388068 | 235395343 | - | HORVU7Hr1G056470 |        |
| chr7H | 236127458 | 236134439 | + | HORVU7Hr1G056490 |        |
| chr7H | 237161371 | 237174117 | + | HORVU7Hr1G056570 |        |
| chr7H | 237647324 | 237651565 | + | HORVU7Hr1G056590 | K01641 |
| chr7H | 237946753 | 237949777 | - | HORVU7Hr1G056600 |        |
| chr7H | 238440698 | 238446807 | + | HORVU7Hr1G056630 |        |
| chr7H | 238655386 | 238656052 | + | HORVU7Hr1G056650 |        |
| chr7H | 238656122 | 238662065 | - | HORVU7Hr1G056660 |        |
| chr7H | 240513113 | 240531374 | + | HORVU7Hr1G056770 |        |
| chr7H | 240520656 | 240521269 | + | HORVU7Hr1G056780 |        |
| chr7H | 240628874 | 240631292 | + | HORVU7Hr1G056790 |        |
| chr7H | 243535369 | 243549081 | + | HORVU7Hr1G057010 |        |
| chr7H | 248143264 | 248146274 | + | HORVU7Hr1G057310 | K19045 |
| chr7H | 248580108 | 248581914 | + | HORVU7Hr1G057330 |        |
| chr7H | 248978165 | 248980455 | - | HORVU7Hr1G057350 |        |
| chr7H | 249987945 | 249993911 | + | HORVU7Hr1G057390 |        |
| chr7H | 251131641 | 251134363 | - | HORVU7Hr1G057470 |        |
| chr7H | 254995599 | 254996632 | + | HORVU7Hr1G058040 |        |
| chr7H | 259173617 | 259189496 | - | HORVU7Hr1G058410 |        |
| chr7H | 261448634 | 261452472 | - | HORVU7Hr1G058850 |        |
| chr7H | 285759629 | 285782957 | + | HORVU7Hr1G061220 |        |
| chr7H | 310310675 | 310312040 | - | HORVU7Hr1G063280 | K02901 |
| chr7H | 310315042 | 310316509 | - | HORVU7Hr1G063290 | K10251 |
| chr7H | 312354778 | 312373967 | - | HORVU7Hr1G063520 |        |
| chr7H | 314409375 | 314409915 | + | HORVU7Hr1G063770 |        |
| chr7H | 324264552 | 324268115 | + | HORVU7Hr1G065280 | K14207 |
| chr7H | 343592862 | 343593277 | + | HORVU7Hr1G066740 |        |
| chr7H | 343596981 | 343600920 | - | HORVU7Hr1G066750 |        |
| chr7H | 350974016 | 350976357 | + | HORVU7Hr1G067280 | K02985 |
| chr7H | 399070399 | 399080044 | - | HORVU7Hr1G071800 | K03141 |
| chr7H | 400513342 | 400517923 | + | HORVU7Hr1G071940 |        |
| chr7H | 400518832 | 400523214 | - | HORVU7Hr1G071960 |        |
| chr7H | 400829251 | 400835819 | - | HORVU7Hr1G072050 |        |
| chr7H | 401049202 | 401096899 | - | HORVU7Hr1G072120 |        |
| chr7H | 404317811 | 404321138 | + | HORVU7Hr1G072420 |        |
| chr7H | 405458507 | 405463986 | - | HORVU7Hr1G072480 |        |

|       |           |           |   |                  |        |
|-------|-----------|-----------|---|------------------|--------|
| chr7H | 408933656 | 408966137 | + | HORVU7Hr1G072790 |        |
| chr7H | 408945029 | 408945184 | - | HORVU7Hr1G072800 |        |
| chr7H | 408945305 | 408945904 | - | HORVU7Hr1G072810 |        |
| chr7H | 408945917 | 408946516 | - | HORVU7Hr1G072820 |        |
| chr7H | 413570039 | 413582405 | + | HORVU7Hr1G073220 |        |
| chr7H | 427045026 | 427046170 | - | HORVU7Hr1G074600 |        |
| chr7H | 427238722 | 427242968 | - | HORVU7Hr1G074640 |        |
| chr7H | 445815006 | 445817001 | + | HORVU7Hr1G076300 |        |
| chr7H | 445817491 | 445819772 | - | HORVU7Hr1G076310 |        |
| chr7H | 451171861 | 451177182 | + | HORVU7Hr1G077110 |        |
| chr7H | 460866409 | 460868613 | - | HORVU7Hr1G078500 | K08515 |
| chr7H | 462745728 | 462752895 | + | HORVU7Hr1G078750 | K15377 |
| chr7H | 463238773 | 463242433 | - | HORVU7Hr1G078770 |        |
| chr7H | 463492869 | 463507474 | + | HORVU7Hr1G078800 |        |
| chr7H | 463508051 | 463514690 | + | HORVU7Hr1G078850 |        |
| chr7H | 464640783 | 464646432 | + | HORVU7Hr1G079000 | K13095 |
| chr7H | 464653655 | 464653727 | + | ENSRNA049441543  |        |
| chr7H | 465025226 | 465036375 | - | HORVU7Hr1G079030 |        |
| chr7H | 465887867 | 465889464 | + | HORVU7Hr1G079190 | K19033 |
| chr7H | 469365393 | 469367735 | + | HORVU7Hr1G079500 |        |
| chr7H | 469375538 | 469380413 | - | HORVU7Hr1G079510 |        |
| chr7H | 473215437 | 473216410 | - | HORVU7Hr1G080050 |        |
| chr7H | 473559055 | 473559912 | - | HORVU7Hr1G080080 | K19038 |
| chr7H | 500367633 | 500378590 | - | HORVU7Hr1G083070 | K14799 |
| chr7H | 502090949 | 502092564 | + | HORVU7Hr1G083360 |        |
| chr7H | 502233708 | 502695154 | - | HORVU7Hr1G083370 |        |
| chr7H | 502928126 | 502931563 | - | HORVU7Hr1G083410 |        |
| chr7H | 503360357 | 503366602 | - | HORVU7Hr1G083480 | K18418 |
| chr7H | 503369928 | 503381186 | - | HORVU7Hr1G083490 |        |
| chr7H | 517019396 | 517024657 | + | HORVU7Hr1G085500 | K14829 |
| chr7H | 522972754 | 522975238 | - | HORVU7Hr1G086720 |        |
| chr7H | 534305062 | 534315817 | + | HORVU7Hr1G088250 |        |
| chr7H | 537244411 | 537251423 | + | HORVU7Hr1G088450 |        |
| chr7H | 540257078 | 540264097 | + | HORVU7Hr1G088960 | K20523 |
| chr7H | 540271901 | 540278990 | - | HORVU7Hr1G088980 |        |
| chr7H | 540677331 | 540679335 | + | HORVU7Hr1G089110 |        |
| chr7H | 540689692 | 540693022 | + | HORVU7Hr1G089120 |        |
| chr7H | 542577531 | 542579345 | - | HORVU7Hr1G089370 | K00430 |
| chr7H | 542583419 | 542586014 | - | HORVU7Hr1G089380 |        |
| chr7H | 543246447 | 543248174 | + | HORVU7Hr1G089480 |        |
| chr7H | 543727930 | 543729952 | - | HORVU7Hr1G089510 |        |
| chr7H | 545412647 | 545417673 | - | HORVU7Hr1G089660 |        |
| chr7H | 546156753 | 546158544 | + | HORVU7Hr1G089870 |        |

|       |           |           |   |                  |        |
|-------|-----------|-----------|---|------------------|--------|
| chr7H | 546426392 | 546430875 | + | HORVU7Hr1G089910 |        |
| chr7H | 546913078 | 546917047 | - | HORVU7Hr1G089960 |        |
| chr7H | 547205417 | 547213806 | - | HORVU7Hr1G090020 |        |
| chr7H | 547315437 | 547316288 | + | HORVU7Hr1G090040 |        |
| chr7H | 547317678 | 547318796 | - | HORVU7Hr1G090050 |        |
| chr7H | 548078348 | 548082099 | - | HORVU7Hr1G090140 |        |
| chr7H | 548933250 | 548935805 | - | HORVU7Hr1G090240 |        |
| chr7H | 550404963 | 550413291 | - | HORVU7Hr1G090330 |        |
| chr7H | 550404963 | 550413302 | + | HORVU7Hr1G090340 |        |
| chr7H | 550734743 | 550737520 | - | HORVU7Hr1G090350 |        |
| chr7H | 550740587 | 550742318 | - | HORVU7Hr1G090360 |        |
| chr7H | 550853424 | 550858384 | + | HORVU7Hr1G090380 | K03064 |
| chr7H | 550858891 | 550866295 | + | HORVU7Hr1G090390 |        |
| chr7H | 552670602 | 552694892 | + | HORVU7Hr1G090650 |        |
| chr7H | 552684535 | 552685357 | + | HORVU7Hr1G090670 | K15627 |
| chr7H | 553103732 | 553106127 | - | HORVU7Hr1G090790 | K12834 |
| chr7H | 554017461 | 554023977 | - | HORVU7Hr1G090900 |        |
| chr7H | 554198073 | 554200387 | - | HORVU7Hr1G090940 | K15151 |
| chr7H | 555785737 | 555788694 | - | HORVU7Hr1G091100 |        |
| chr7H | 557913758 | 557915024 | + | HORVU7Hr1G091350 | K14488 |
| chr7H | 557948460 | 557957088 | - | HORVU7Hr1G091360 |        |
| chr7H | 559400701 | 559403941 | - | HORVU7Hr1G091440 |        |
| chr7H | 559896533 | 559897789 | + | HORVU7Hr1G091560 |        |
| chr7H | 559899709 | 559906098 | + | HORVU7Hr1G091570 |        |
| chr7H | 559905250 | 559906090 | - | HORVU7Hr1G091580 |        |
| chr7H | 561659828 | 561668258 | + | HORVU7Hr1G091810 |        |
| chr7H | 561672364 | 561673570 | + | HORVU7Hr1G091830 |        |
| chr7H | 563336962 | 563339376 | + | HORVU7Hr1G092030 |        |
| chr7H | 564731459 | 564735265 | + | HORVU7Hr1G092230 | K13356 |
| chr7H | 564737238 | 564740225 | - | HORVU7Hr1G092240 | K13456 |
| chr7H | 566875125 | 566878840 | + | HORVU7Hr1G092550 |        |
| chr7H | 566885978 | 566889696 | - | HORVU7Hr1G092560 |        |
| chr7H | 567022987 | 567025116 | + | HORVU7Hr1G092570 |        |
| chr7H | 568286293 | 568289672 | + | HORVU7Hr1G092810 |        |
| chr7H | 570046163 | 570059714 | + | HORVU7Hr1G093200 |        |
| chr7H | 577781998 | 577789646 | + | HORVU7Hr1G094850 |        |
| chr7H | 577786087 | 577793427 | - | HORVU7Hr1G094860 |        |
| chr7H | 582766299 | 582768290 | + | HORVU7Hr1G095550 | K15227 |
| chr7H | 586453584 | 586456625 | - | HORVU7Hr1G096170 | K14864 |
| chr7H | 587050932 | 587064975 | + | HORVU7Hr1G096240 |        |
| chr7H | 587065464 | 587069800 | + | HORVU7Hr1G096250 |        |
| chr7H | 587334940 | 587339776 | + | HORVU7Hr1G096300 | K01698 |
| chr7H | 587340841 | 587343131 | - | HORVU7Hr1G096310 |        |

|       |           |           |   |                  |        |
|-------|-----------|-----------|---|------------------|--------|
| chr7H | 587768812 | 587773329 | + | HORVU7Hr1G096360 |        |
| chr7H | 587770547 | 587773339 | - | HORVU7Hr1G096370 |        |
| chr7H | 588873152 | 588876551 | + | HORVU7Hr1G096670 |        |
| chr7H | 591550703 | 591556171 | - | HORVU7Hr1G097250 |        |
| chr7H | 592415795 | 592422825 | + | HORVU7Hr1G097470 |        |
| chr7H | 593797574 | 593805946 | + | HORVU7Hr1G097860 |        |
| chr7H | 593806745 | 593807955 | + | HORVU7Hr1G097870 | K22312 |
| chr7H | 593809872 | 593809944 | + | ENSRNA049441092  |        |
| chr7H | 606342950 | 606344505 | + | HORVU7Hr1G100790 |        |
| chr7H | 606347563 | 606350332 | - | HORVU7Hr1G100800 |        |
| chr7H | 609402126 | 609407087 | + | HORVU7Hr1G101500 | K17871 |
| chr7H | 617090172 | 617090751 | - | HORVU7Hr1G105470 | K01047 |
| chr7H | 617091976 | 617101370 | - | HORVU7Hr1G105490 |        |
| chr7H | 617102780 | 617103913 | - | HORVU7Hr1G105500 | K08065 |
| chr7H | 617110917 | 617114740 | - | HORVU7Hr1G105510 |        |
| chr7H | 617115496 | 617117707 | + | HORVU7Hr1G105520 | K09422 |
| chr7H | 620784469 | 620789669 | + | HORVU7Hr1G106780 |        |
| chr7H | 620792136 | 620794036 | - | HORVU7Hr1G106790 |        |
| chr7H | 621825575 | 621833118 | + | HORVU7Hr1G107050 | K17680 |
| chr7H | 621832543 | 621832731 | - | HORVU7Hr1G107060 |        |
| chr7H | 621834268 | 621836472 | + | HORVU7Hr1G107070 |        |
| chr7H | 621836594 | 621839030 | + | HORVU7Hr1G107080 | K12668 |
| chr7H | 621839414 | 621842700 | - | HORVU7Hr1G107100 | K07375 |
| chr7H | 623413985 | 623419666 | + | HORVU7Hr1G107550 |        |
| chr7H | 623697682 | 623701888 | + | HORVU7Hr1G107740 |        |
| chr7H | 627313778 | 627314831 | - | HORVU7Hr1G109200 |        |
| chr7H | 627315504 | 627317238 | - | HORVU7Hr1G109210 |        |
| chr7H | 628247557 | 628248157 | - | HORVU7Hr1G109540 |        |
| chr7H | 628254382 | 628257576 | + | HORVU7Hr1G109550 |        |
| chr7H | 628360508 | 628360580 | + | ENSRNA049440972  |        |
| chr7H | 628363979 | 628364051 | + | ENSRNA049440961  |        |
| chr7H | 628364391 | 628364463 | - | ENSRNA049441783  |        |
| chr7H | 628364665 | 628369128 | - | HORVU7Hr1G109580 |        |
| chr7H | 628369567 | 628374492 | - | HORVU7Hr1G109590 |        |
| chr7H | 628952998 | 628958777 | + | HORVU7Hr1G109780 | K01669 |
| chr7H | 628954869 | 628958773 | - | HORVU7Hr1G109800 | K01669 |
| chr7H | 629272958 | 629278828 | + | HORVU7Hr1G109990 |        |
| chr7H | 629279184 | 629279406 | + | HORVU7Hr1G110010 |        |
| chr7H | 629279194 | 629279413 | - | ENSRNA049488657  |        |
| chr7H | 629282113 | 629282332 | - | ENSRNA049488655  |        |
| chr7H | 629950371 | 629954881 | - | HORVU7Hr1G110440 |        |
| chr7H | 637258554 | 637259907 | - | HORVU7Hr1G113530 |        |
| chr7H | 638730005 | 638730454 | - | HORVU7Hr1G114090 |        |

|       |           |           |   |                  |        |
|-------|-----------|-----------|---|------------------|--------|
| chr7H | 638911322 | 638913789 | + | HORVU7Hr1G114170 |        |
| chr7H | 640595999 | 640598651 | - | HORVU7Hr1G114950 | K01673 |
| chr7H | 640603497 | 640606918 | - | HORVU7Hr1G114960 |        |
| chr7H | 640618568 | 640618780 | - | HORVU7Hr1G114980 |        |
| chr7H | 640840159 | 640840713 | - | HORVU7Hr1G115130 |        |
| chr7H | 640845847 | 640846103 | + | HORVU7Hr1G115150 |        |
| chr7H | 646985126 | 646986042 | - | HORVU7Hr1G118220 |        |
| chr7H | 646996504 | 647004378 | - | HORVU7Hr1G118230 |        |
| chr7H | 647183877 | 647190478 | + | HORVU7Hr1G118300 |        |
| chr7H | 648306135 | 648307667 | + | HORVU7Hr1G118760 |        |
| chr7H | 648927631 | 648929836 | + | HORVU7Hr1G119040 |        |
| chr7H | 648932670 | 648934784 | + | HORVU7Hr1G119050 |        |
| chr7H | 649461248 | 649462826 | + | HORVU7Hr1G119360 |        |
| chr7H | 649466990 | 649472294 | + | HORVU7Hr1G119370 |        |
| chr7H | 649994417 | 649998004 | + | HORVU7Hr1G119590 |        |
| chr7H | 649999627 | 650002431 | + | HORVU7Hr1G119610 |        |
| chr7H | 650390677 | 650393515 | - | HORVU7Hr1G119810 | K12871 |
| chr7H | 650398234 | 650404481 | + | HORVU7Hr1G119820 | K01354 |
| chr7H | 650553586 | 650555302 | + | HORVU7Hr1G119870 |        |
| chr7H | 650875980 | 650880895 | + | HORVU7Hr1G120070 | K00791 |
| chr7H | 650882126 | 650883358 | - | HORVU7Hr1G120100 |        |
| chr7H | 650884266 | 650887906 | + | HORVU7Hr1G120120 |        |
| chr7H | 650888232 | 650891426 | - | HORVU7Hr1G120130 |        |
| chr7H | 651001497 | 651006560 | - | HORVU7Hr1G120170 |        |
| chr7H | 651006689 | 651006874 | - | HORVU7Hr1G120180 |        |
| chr7H | 651008226 | 651010988 | - | HORVU7Hr1G120190 |        |
| chr7H | 651066589 | 651066788 | + | HORVU7Hr1G120220 |        |
| chr7H | 651190889 | 651192744 | + | HORVU7Hr1G120340 | K18801 |
| chr7H | 651202413 | 651203090 | - | HORVU7Hr1G120350 | K00224 |
| chr7H | 651204386 | 651204457 | - | ENSRNA049441948  |        |
| chr7H | 651727091 | 651731987 | - | HORVU7Hr1G120520 | K00695 |
| chr7H | 651732286 | 651737413 | - | HORVU7Hr1G120540 |        |
| chr4H | 1139723   | 1146439   | + | HORVU4Hr1G000660 |        |
| chr4H | 1139723   | 1146539   | - | HORVU4Hr1G000670 |        |
| chr4H | 4190962   | 4197198   | + | HORVU4Hr1G002270 | K00549 |
| chr4H | 4194802   | 4197705   | - | HORVU4Hr1G002280 | K00549 |
| chr4H | 23461411  | 23468904  | + | HORVU4Hr1G008530 |        |
| chr4H | 24979535  | 24985488  | - | HORVU4Hr1G008820 | K11649 |
| chr4H | 41102174  | 41113394  | + | HORVU4Hr1G012400 |        |
| chr4H | 41113699  | 41120291  | + | HORVU4Hr1G012420 |        |
| chr4H | 46530586  | 46535255  | - | HORVU4Hr1G013370 | K01557 |
| chr4H | 169641352 | 169659789 | + | HORVU4Hr1G027660 |        |
| chr4H | 361478965 | 361479169 | + | HORVU4Hr1G045320 |        |

|       |           |           |   |                  |        |
|-------|-----------|-----------|---|------------------|--------|
| chr4H | 361484961 | 361485272 | + | HORVU4Hr1G045330 | K02954 |
| chr4H | 361485922 | 361489404 | - | HORVU4Hr1G045340 |        |
| chr4H | 361490376 | 361490975 | - | HORVU4Hr1G045350 |        |
| chr4H | 361491123 | 361491833 | - | HORVU4Hr1G045360 | K02967 |
| chr4H | 361492123 | 361495642 | - | HORVU4Hr1G045370 |        |
| chr4H | 400956204 | 400956770 | - | HORVU4Hr1G049520 |        |
| chr4H | 417883099 | 417890420 | + | HORVU4Hr1G051080 |        |
| chr4H | 510061239 | 510070825 | + | HORVU4Hr1G060770 |        |
| chr4H | 510639049 | 510643775 | + | HORVU4Hr1G060840 | K01689 |
| chr4H | 510644289 | 510652701 | - | HORVU4Hr1G060850 | K09377 |
| chr4H | 510806317 | 510808521 | + | HORVU4Hr1G060870 |        |
| chr4H | 510807431 | 510836346 | - | HORVU4Hr1G060880 |        |
| chr4H | 514972820 | 514973061 | + | HORVU4Hr1G061280 |        |
| chr4H | 548294448 | 548301852 | + | HORVU4Hr1G065840 |        |
| chr4H | 551855901 | 551858769 | + | HORVU4Hr1G066270 | K01723 |
| chr4H | 552163701 | 552170700 | + | HORVU4Hr1G066290 |        |
| chr4H | 552171438 | 552177564 | + | HORVU4Hr1G066300 | K20293 |
| chr4H | 552178325 | 552187672 | + | HORVU4Hr1G066310 |        |
| chr4H | 553587802 | 553591880 | + | HORVU4Hr1G066430 | K17497 |
| chr4H | 568144386 | 568145562 | - | HORVU4Hr1G069020 | K08818 |
| chr4H | 570191753 | 570193879 | + | HORVU4Hr1G069340 |        |
| chr4H | 570198175 | 570203753 | - | HORVU4Hr1G069350 | K14961 |
| chr4H | 570685107 | 570688166 | - | HORVU4Hr1G069400 |        |
| chr4H | 580160224 | 580171376 | - | HORVU4Hr1G071270 | K14521 |
| chr4H | 581783894 | 581788589 | + | HORVU4Hr1G071730 | K01858 |
| chr4H | 581790031 | 581793337 | + | HORVU4Hr1G071740 |        |
| chr4H | 586053285 | 586054726 | + | HORVU4Hr1G072580 |        |
| chr4H | 586057297 | 586062059 | - | HORVU4Hr1G072590 | K21919 |
| chr4H | 587734249 | 587744270 | - | HORVU4Hr1G073060 |        |
| chr4H | 592930774 | 592934000 | + | HORVU4Hr1G074090 |        |
| chr4H | 592935468 | 592938873 | - | HORVU4Hr1G074110 |        |
| chr4H | 593061716 | 593070429 | + | HORVU4Hr1G074120 |        |
| chr4H | 595320934 | 595321222 | - | ENSRNA049476731  |        |
| chr4H | 595326889 | 595332144 | + | HORVU4Hr1G074740 |        |
| chr4H | 595328382 | 595332072 | - | HORVU4Hr1G074750 |        |
| chr4H | 595765001 | 595767436 | + | HORVU4Hr1G074800 | K02911 |
| chr4H | 595767928 | 595772404 | + | HORVU4Hr1G074810 | K01783 |
| chr4H | 596118056 | 596119843 | + | HORVU4Hr1G074980 |        |
| chr4H | 596122913 | 596125612 | - | HORVU4Hr1G074990 |        |
| chr4H | 597422094 | 597430076 | + | HORVU4Hr1G075250 |        |
| chr4H | 602036645 | 602040680 | - | HORVU4Hr1G076940 | K15397 |
| chr4H | 608004520 | 608006040 | + | HORVU4Hr1G078580 | K14823 |
| chr4H | 608008537 | 608012340 | - | HORVU4Hr1G078590 |        |

|       |           |           |   |                  |        |
|-------|-----------|-----------|---|------------------|--------|
| chr4H | 609242210 | 609247714 | + | HORVU4Hr1G078820 | K04077 |
| chr4H | 609248237 | 609251008 | - | HORVU4Hr1G078830 | K09486 |
| chr4H | 610930296 | 610934429 | - | HORVU4Hr1G079090 |        |
| chr4H | 611679942 | 611682960 | - | HORVU4Hr1G079260 |        |
| chr4H | 611690785 | 611692599 | - | HORVU4Hr1G079270 |        |
| chr4H | 613789679 | 613791820 | + | HORVU4Hr1G079990 |        |
| chr4H | 613793336 | 613797119 | - | HORVU4Hr1G080000 | K01945 |
| chr4H | 613798524 | 613801057 | - | HORVU4Hr1G080020 |        |
| chr4H | 613805852 | 613807701 | - | HORVU4Hr1G080030 |        |
| chr4H | 613808586 | 613814590 | - | HORVU4Hr1G080050 |        |
| chr4H | 615347929 | 615351231 | + | HORVU4Hr1G080410 |        |
| chr4H | 615697912 | 615705266 | - | HORVU4Hr1G080450 |        |
| chr4H | 617388840 | 617391479 | + | HORVU4Hr1G080780 | K08242 |
| chr4H | 617393608 | 617393889 | + | HORVU4Hr1G080790 |        |
| chr4H | 619752840 | 619755607 | + | HORVU4Hr1G081590 |        |
| chr4H | 619756654 | 619761706 | - | HORVU4Hr1G081600 |        |
| chr4H | 622059599 | 622062306 | + | HORVU4Hr1G082290 | K00939 |
| chr4H | 626074071 | 626080945 | + | HORVU4Hr1G083530 |        |
| chr4H | 626728557 | 626730255 | - | HORVU4Hr1G083800 |        |
| chr4H | 626735127 | 626735197 | - | ENSRNA049445750  |        |
| chr4H | 626835280 | 626849146 | + | HORVU4Hr1G083860 | K24169 |
| chr4H | 626844134 | 626849158 | - | HORVU4Hr1G083870 |        |
| chr4H | 626997423 | 627002978 | + | HORVU4Hr1G083950 | K16296 |
| chr4H | 628371674 | 628373285 | - | HORVU4Hr1G084360 | K09422 |
| chr4H | 628801846 | 628803652 | + | HORVU4Hr1G084420 | K02889 |
| chr4H | 629355424 | 629360910 | + | HORVU4Hr1G084590 |        |
| chr4H | 629483972 | 629487192 | + | HORVU4Hr1G084600 |        |
| chr4H | 629644007 | 629644737 | + | HORVU4Hr1G084750 |        |
| chr4H | 629644892 | 629647909 | - | HORVU4Hr1G084760 | K10577 |
| chr4H | 630166309 | 630173377 | + | HORVU4Hr1G084840 |        |
| chr4H | 630183883 | 630188317 | + | HORVU4Hr1G084850 |        |
| chr4H | 630855665 | 630860598 | + | HORVU4Hr1G085050 | K22390 |
| chr4H | 630862306 | 630862811 | + | HORVU4Hr1G085060 |        |
| chr4H | 630915285 | 630916047 | + | HORVU4Hr1G085120 |        |
| chr4H | 631469114 | 631473133 | - | HORVU4Hr1G085280 |        |
| chr4H | 632308238 | 632310222 | + | HORVU4Hr1G085730 |        |
| chr4H | 632310354 | 632313768 | - | HORVU4Hr1G085740 | K19323 |
| chr4H | 632316301 | 632325141 | - | HORVU4Hr1G085750 |        |
| chr4H | 633040947 | 633043407 | + | HORVU4Hr1G085960 |        |
| chr4H | 633160208 | 633161206 | + | HORVU4Hr1G085990 |        |
| chr4H | 633169005 | 633174352 | + | HORVU4Hr1G086000 |        |
| chr4H | 633178339 | 633181842 | + | HORVU4Hr1G086010 | K03036 |
| chr4H | 633181302 | 633184491 | - | HORVU4Hr1G086020 |        |

|       |           |           |   |                  |        |
|-------|-----------|-----------|---|------------------|--------|
| chr4H | 636582909 | 636595402 | - | HORVU4Hr1G087360 |        |
| chr4H | 637460167 | 637467469 | - | HORVU4Hr1G087580 |        |
| chr4H | 641086962 | 641088357 | + | HORVU4Hr1G088780 |        |
| chr4H | 641185538 | 641189869 | + | HORVU4Hr1G088860 | K24175 |
| chr4H | 641191823 | 641192977 | - | HORVU4Hr1G088870 | K17794 |
| chr4H | 641293324 | 641295356 | - | HORVU4Hr1G088930 |        |
| chr4H | 642064582 | 642066848 | + | HORVU4Hr1G089270 |        |
| chr4H | 642064583 | 642071249 | - | HORVU4Hr1G089280 |        |
| chr4H | 643004384 | 643006737 | - | HORVU4Hr1G089560 |        |
| chr4H | 643012334 | 643013799 | + | HORVU4Hr1G089580 |        |
| chr4H | 643053070 | 643099588 | - | HORVU4Hr1G089590 |        |
| chr4H | 643065106 | 643069109 | - | HORVU4Hr1G089610 | K13508 |
| chr4H | 645151567 | 645157915 | + | HORVU4Hr1G090440 | K03695 |
| chr6H | 1003557   | 1008128   | - | HORVU6Hr1G000410 |        |
| chr6H | 7115759   | 7811829   | - | HORVU6Hr1G002980 |        |
| chr6H | 11516051  | 11518503  | - | HORVU6Hr1G005250 | K10528 |
| chr6H | 12304004  | 12305697  | + | HORVU6Hr1G005510 |        |
| chr6H | 30624331  | 30625123  | - | HORVU6Hr1G014380 | K10807 |
| chr6H | 31190108  | 31192857  | + | HORVU6Hr1G014630 |        |
| chr6H | 31209949  | 31217307  | + | HORVU6Hr1G014650 | K22048 |
| chr6H | 47359727  | 47366647  | + | HORVU6Hr1G018520 | K01322 |
| chr6H | 59555539  | 59559020  | + | HORVU6Hr1G020720 | K22390 |
| chr6H | 59559052  | 59560252  | - | HORVU6Hr1G020730 |        |
| chr6H | 61095579  | 61098767  | + | HORVU6Hr1G020920 | K17435 |
| chr6H | 61106759  | 61108080  | + | HORVU6Hr1G020950 | K00430 |
| chr6H | 74343823  | 74348510  | - | HORVU6Hr1G023040 |        |
| chr6H | 74352626  | 74367496  | - | HORVU6Hr1G023050 |        |
| chr6H | 74382826  | 74385170  | + | HORVU6Hr1G023070 |        |
| chr6H | 92181799  | 92188149  | + | HORVU6Hr1G025410 |        |
| chr6H | 92188590  | 92188713  | + | ENSRNA049486160  |        |
| chr6H | 109666059 | 109673065 | + | HORVU6Hr1G027650 |        |
| chr6H | 109668342 | 109673985 | - | HORVU6Hr1G027660 |        |
| chr6H | 130614643 | 130616732 | - | HORVU6Hr1G030940 |        |
| chr6H | 146581719 | 146584641 | - | HORVU6Hr1G032940 | K12486 |
| chr6H | 146603312 | 146607205 | - | HORVU6Hr1G032960 | K13448 |
| chr6H | 169991412 | 169996625 | + | HORVU6Hr1G035370 |        |
| chr6H | 396723351 | 396725966 | + | HORVU6Hr1G059910 |        |
| chr6H | 460161434 | 460166982 | - | HORVU6Hr1G066470 |        |
| chr6H | 509623775 | 509629249 | + | HORVU6Hr1G073590 |        |
| chr6H | 522762416 | 522768170 | + | HORVU6Hr1G075950 | K00703 |
| chr6H | 543053435 | 543055116 | + | HORVU6Hr1G080830 |        |
| chr6H | 567649130 | 567650087 | + | HORVU6Hr1G088870 |        |
| chr6H | 567650424 | 567653825 | - | HORVU6Hr1G088880 |        |

|       |           |           |   |                  |        |
|-------|-----------|-----------|---|------------------|--------|
| chr6H | 581140213 | 581142855 | - | HORVU6Hr1G094400 |        |
| chr6H | 581144737 | 581147339 | - | HORVU6Hr1G094410 |        |
| chr6H | 581146367 | 581146438 | + | ENSRNA049446549  |        |
| chr6H | 581148325 | 581149332 | - | HORVU6Hr1G094420 |        |
| chr6H | 581260966 | 581272419 | - | HORVU6Hr1G094470 |        |
| chr6H | 582628571 | 582636599 | + | HORVU6Hr1G095000 |        |
| chr1H | 4165175   | 4167785   | - | HORVU1Hr1G001920 | K07904 |
| chr1H | 8912375   | 8919563   | + | HORVU1Hr1G004200 | K17943 |
| chr1H | 8925545   | 8925626   | - | ENSRNA049447299  |        |
| chr1H | 8928791   | 8928872   | - | ENSRNA049447315  |        |
| chr1H | 8929487   | 8937936   | + | HORVU1Hr1G004230 | K21989 |
| chr1H | 10739577  | 10746629  | + | HORVU1Hr1G004960 | K14298 |
| chr1H | 10747147  | 10750379  | - | HORVU1Hr1G004970 |        |
| chr1H | 22161111  | 22162182  | - | HORVU1Hr1G009880 |        |
| chr1H | 22166621  | 22176854  | + | HORVU1Hr1G009900 | K14301 |
| chr1H | 22179163  | 22179855  | + | HORVU1Hr1G009910 |        |
| chr1H | 23059462  | 23064407  | + | HORVU1Hr1G010130 |        |
| chr1H | 37164281  | 37167912  | - | HORVU1Hr1G013780 |        |
| chr1H | 41005783  | 41007234  | + | HORVU1Hr1G014700 |        |
| chr1H | 41010020  | 41012215  | - | HORVU1Hr1G014710 |        |
| chr1H | 41229756  | 41235195  | + | HORVU1Hr1G014800 |        |
| chr1H | 49797840  | 49799683  | - | HORVU1Hr1G016140 |        |
| chr1H | 73917857  | 73919159  | - | HORVU1Hr1G019560 |        |
| chr1H | 73920478  | 73928662  | + | HORVU1Hr1G019570 |        |
| chr1H | 73929575  | 73934623  | - | HORVU1Hr1G019580 |        |
| chr1H | 76984039  | 76992770  | + | HORVU1Hr1G020000 |        |
| chr1H | 76998224  | 77000693  | + | HORVU1Hr1G020010 |        |
| chr1H | 77001065  | 77004795  | - | HORVU1Hr1G020020 |        |
| chr1H | 80475435  | 80478390  | + | HORVU1Hr1G020420 |        |
| chr1H | 80487032  | 80488367  | - | HORVU1Hr1G020430 |        |
| chr1H | 80825648  | 80825788  | - | HORVU1Hr1G020460 |        |
| chr1H | 80827355  | 80832088  | + | HORVU1Hr1G020470 | K12449 |
| chr1H | 84326638  | 84338957  | + | HORVU1Hr1G021120 |        |
| chr1H | 84348112  | 84349441  | + | HORVU1Hr1G021140 | K00799 |
| chr1H | 84399076  | 84400190  | + | HORVU1Hr1G021150 | K00799 |
| chr1H | 85081952  | 85093686  | - | HORVU1Hr1G021190 |        |
| chr1H | 101577960 | 101579688 | - | HORVU1Hr1G023220 |        |
| chr1H | 104746260 | 104750117 | - | HORVU1Hr1G023630 |        |
| chr1H | 108166411 | 108190963 | + | HORVU1Hr1G024170 |        |
| chr1H | 109039019 | 109045407 | - | HORVU1Hr1G024220 |        |
| chr1H | 109045587 | 109055596 | - | HORVU1Hr1G024240 |        |
| chr1H | 114810823 | 114815858 | + | HORVU1Hr1G024640 |        |
| chr1H | 114851140 | 114855324 | + | HORVU1Hr1G024660 |        |

|       |           |           |   |                  |        |
|-------|-----------|-----------|---|------------------|--------|
| chr1H | 114851474 | 114862830 | - | HORVU1Hr1G024670 |        |
| chr1H | 116968884 | 116969646 | + | HORVU1Hr1G024860 |        |
| chr1H | 122695030 | 122698867 | - | HORVU1Hr1G025360 | K00565 |
| chr1H | 123301589 | 123308893 | - | HORVU1Hr1G025390 |        |
| chr1H | 161035667 | 161047820 | + | HORVU1Hr1G029110 |        |
| chr1H | 163825897 | 163828523 | + | HORVU1Hr1G029460 |        |
| chr1H | 167188888 | 167192229 | - | HORVU1Hr1G029850 | K13448 |
| chr1H | 176445767 | 176446329 | + | HORVU1Hr1G030580 |        |
| chr1H | 184270591 | 184270927 | - | HORVU1Hr1G031150 |        |
| chr1H | 196891816 | 196896688 | - | HORVU1Hr1G031970 |        |
| chr1H | 206698784 | 206708456 | + | HORVU1Hr1G033060 |        |
| chr1H | 264142661 | 264144956 | + | HORVU1Hr1G038260 |        |
| chr1H | 264143785 | 264148150 | - | HORVU1Hr1G038270 | K01519 |
| chr1H | 265256443 | 265260727 | - | HORVU1Hr1G038330 |        |
| chr1H | 271292873 | 271294712 | + | HORVU1Hr1G038890 | K02889 |
| chr1H | 299740681 | 299751249 | + | HORVU1Hr1G041790 | K09338 |
| chr1H | 321614760 | 321618227 | + | HORVU1Hr1G044040 |        |
| chr1H | 321616679 | 321617299 | + | HORVU1Hr1G044050 |        |
| chr1H | 327493923 | 327498458 | - | HORVU1Hr1G045080 |        |
| chr1H | 327493945 | 327498471 | + | HORVU1Hr1G045090 |        |
| chr1H | 341763204 | 341772442 | - | HORVU1Hr1G046630 | K01873 |
| chr1H | 352060712 | 352077732 | + | HORVU1Hr1G047640 |        |
| chr1H | 353957421 | 353968844 | + | HORVU1Hr1G047820 |        |
| chr1H | 355275799 | 355286904 | + | HORVU1Hr1G047980 |        |
| chr1H | 356712296 | 356717513 | - | HORVU1Hr1G048340 |        |
| chr1H | 361583031 | 361592163 | + | HORVU1Hr1G048720 |        |
| chr1H | 361646491 | 361651154 | + | HORVU1Hr1G048760 |        |
| chr1H | 366447146 | 366454682 | + | HORVU1Hr1G049460 |        |
| chr1H | 366453344 | 366460489 | - | HORVU1Hr1G049470 |        |
| chr1H | 366507315 | 366510797 | - | HORVU1Hr1G049480 |        |
| chr1H | 377081195 | 377090680 | + | HORVU1Hr1G050840 |        |
| chr1H | 377082048 | 377090723 | - | HORVU1Hr1G050850 |        |
| chr1H | 379463530 | 379470722 | - | HORVU1Hr1G051150 | K00968 |
| chr1H | 379485428 | 379487713 | + | HORVU1Hr1G051160 |        |
| chr1H | 379493162 | 379494164 | + | HORVU1Hr1G051180 |        |
| chr1H | 380089048 | 380094403 | - | HORVU1Hr1G051220 |        |
| chr1H | 380919406 | 380920906 | - | HORVU1Hr1G051400 |        |
| chr1H | 380925803 | 380928956 | - | HORVU1Hr1G051410 |        |
| chr1H | 381313035 | 381328695 | + | HORVU1Hr1G051460 |        |
| chr1H | 381322517 | 381328711 | - | HORVU1Hr1G051470 |        |
| chr1H | 382299770 | 382300802 | - | HORVU1Hr1G051560 |        |
| chr1H | 382301293 | 382317173 | - | HORVU1Hr1G051570 | K17973 |
| chr1H | 383460565 | 383462205 | - | HORVU1Hr1G051700 |        |

|       |           |           |   |                  |        |
|-------|-----------|-----------|---|------------------|--------|
| chr1H | 385625811 | 385629388 | + | HORVU1Hr1G052010 |        |
| chr1H | 387545376 | 387551621 | - | HORVU1Hr1G052260 | K04523 |
| chr1H | 387550377 | 387553526 | + | HORVU1Hr1G052270 | K03013 |
| chr1H | 387556524 | 387557972 | + | HORVU1Hr1G052280 |        |
| chr1H | 393441626 | 393460600 | - | HORVU1Hr1G053190 |        |
| chr1H | 393963164 | 393967064 | - | HORVU1Hr1G053270 |        |
| chr1H | 393971002 | 393974978 | - | HORVU1Hr1G053280 |        |
| chr1H | 394194166 | 394199269 | - | HORVU1Hr1G053320 | K00826 |
| chr1H | 394411517 | 394417153 | + | HORVU1Hr1G053340 |        |
| chr1H | 394417623 | 394420439 | - | HORVU1Hr1G053350 |        |
| chr1H | 395873135 | 395875994 | + | HORVU1Hr1G053510 |        |
| chr1H | 397672141 | 397673986 | - | HORVU1Hr1G053890 |        |
| chr1H | 397861757 | 397861827 | - | ENSRNA049447675  |        |
| chr1H | 398276256 | 398284346 | - | HORVU1Hr1G053930 |        |
| chr1H | 398281263 | 398281754 | - | HORVU1Hr1G053940 |        |
| chr1H | 398652421 | 398808254 | - | HORVU1Hr1G053990 |        |
| chr1H | 399234596 | 399237714 | - | HORVU1Hr1G054060 |        |
| chr1H | 400546354 | 400547881 | + | HORVU1Hr1G054200 |        |
| chr1H | 401040803 | 401045363 | - | HORVU1Hr1G054240 |        |
| chr1H | 406525155 | 406531073 | + | HORVU1Hr1G055510 |        |
| chr1H | 406533021 | 406535450 | + | HORVU1Hr1G055520 |        |
| chr1H | 406997955 | 407009508 | + | HORVU1Hr1G055580 |        |
| chr1H | 410771953 | 410775529 | - | HORVU1Hr1G056070 | K00652 |
| chr1H | 414864751 | 414869005 | + | HORVU1Hr1G056510 |        |
| chr1H | 415278902 | 415281508 | + | HORVU1Hr1G056630 | K06118 |
| chr1H | 420229299 | 420233386 | - | HORVU1Hr1G057570 | K03955 |
| chr1H | 422557131 | 422560475 | + | HORVU1Hr1G057950 |        |
| chr1H | 435593439 | 435596729 | - | HORVU1Hr1G059960 |        |
| chr1H | 435667107 | 435670374 | + | HORVU1Hr1G059990 | K09537 |
| chr1H | 437148534 | 437151974 | + | HORVU1Hr1G060100 | K11363 |
| chr1H | 437159294 | 437160728 | - | HORVU1Hr1G060110 |        |
| chr1H | 437163783 | 437164350 | + | HORVU1Hr1G060130 |        |
| chr1H | 437275262 | 437279877 | + | HORVU1Hr1G060140 |        |
| chr1H | 437281398 | 437287737 | - | HORVU1Hr1G060150 |        |
| chr1H | 437443399 | 437450543 | - | HORVU1Hr1G060180 | K14293 |
| chr1H | 437443473 | 437446092 | + | HORVU1Hr1G060190 |        |
| chr1H | 443090309 | 443090737 | - | HORVU1Hr1G061070 |        |
| chr1H | 443090314 | 443091482 | + | HORVU1Hr1G061080 |        |
| chr1H | 443091773 | 443131375 | - | HORVU1Hr1G061090 |        |
| chr1H | 444526428 | 444530074 | - | HORVU1Hr1G061430 | K14009 |
| chr1H | 448818340 | 448821848 | + | HORVU1Hr1G062290 |        |
| chr1H | 451995060 | 451999971 | + | HORVU1Hr1G062940 |        |
| chr1H | 451995105 | 452001043 | - | HORVU1Hr1G062950 |        |

|       |           |           |   |                  |        |
|-------|-----------|-----------|---|------------------|--------|
| chr1H | 454317352 | 454321668 | + | HORVU1Hr1G063320 |        |
| chr1H | 470634738 | 470637183 | - | HORVU1Hr1G066120 |        |
| chr1H | 471472632 | 471476335 | - | HORVU1Hr1G066240 | K03809 |
| chr1H | 472946083 | 472947141 | + | HORVU1Hr1G066500 | K02116 |
| chr1H | 472948820 | 472951168 | - | HORVU1Hr1G066510 |        |
| chr1H | 473008356 | 473010850 | + | HORVU1Hr1G066530 |        |
| chr1H | 477270747 | 477276317 | - | HORVU1Hr1G067200 |        |
| chr1H | 487882055 | 487884794 | - | HORVU1Hr1G069990 |        |
| chr1H | 518159277 | 518160365 | - | HORVU1Hr1G077680 | K14516 |
| chr1H | 518554761 | 518558462 | - | HORVU1Hr1G077790 |        |
| chr1H | 522495889 | 522497697 | + | HORVU1Hr1G079210 |        |
| chr1H | 524725774 | 524730118 | - | HORVU1Hr1G080290 | K14497 |
| chr1H | 525014151 | 525021376 | - | HORVU1Hr1G080320 |        |
| chr1H | 525562530 | 525565898 | + | HORVU1Hr1G080510 |        |
| chr1H | 525567058 | 525571275 | + | HORVU1Hr1G080520 | K14156 |
| chr1H | 527443694 | 527446128 | + | HORVU1Hr1G081300 | K09419 |
| chr1H | 527446416 | 527451361 | - | HORVU1Hr1G081310 |        |
| chr1H | 527813325 | 527814684 | + | HORVU1Hr1G081500 |        |
| chr1H | 532367085 | 532371148 | + | HORVU1Hr1G083720 | K10758 |
| chr1H | 532368566 | 532373925 | - | HORVU1Hr1G083730 | K10758 |
| chr1H | 540571001 | 540572989 | - | HORVU1Hr1G087870 |        |
| chr1H | 540581949 | 540584326 | - | HORVU1Hr1G087880 |        |
| chr1H | 540584485 | 540593837 | - | HORVU1Hr1G087900 |        |
| chr1H | 541346878 | 541351320 | + | HORVU1Hr1G088270 |        |
| chr1H | 544690027 | 544692914 | - | HORVU1Hr1G089710 | K15397 |
| chr1H | 544734788 | 544736482 | + | HORVU1Hr1G089730 | K22068 |
| chr1H | 544741794 | 544742915 | + | HORVU1Hr1G089760 | K02935 |
| chr1H | 544744250 | 544746044 | - | HORVU1Hr1G089770 | K09422 |
| chr1H | 544749530 | 544755172 | + | HORVU1Hr1G089780 |        |
| chr1H | 544903067 | 544906482 | + | HORVU1Hr1G089820 |        |
| chr1H | 544907085 | 544909570 | - | HORVU1Hr1G089830 | K15095 |
| chr1H | 544918998 | 544920368 | - | HORVU1Hr1G089840 |        |
| chr1H | 545123927 | 545127861 | - | HORVU1Hr1G090020 | K01792 |
| chr1H | 545321477 | 545323501 | + | HORVU1Hr1G090100 |        |
| chr1H | 546270397 | 546273711 | + | HORVU1Hr1G090450 |        |
| chr1H | 546276302 | 546276823 | + | HORVU1Hr1G090460 |        |
| chr1H | 546836401 | 546839215 | - | HORVU1Hr1G090730 | K15397 |
| chr1H | 546839963 | 546843526 | - | HORVU1Hr1G090740 |        |
| chr1H | 552686367 | 552688044 | - | HORVU1Hr1G093350 |        |
| chr1H | 554147341 | 554150184 | + | HORVU1Hr1G093860 |        |
| chrUn | 2088100   | 2089839   | + | HORVU0Hr1G000320 |        |
| chrUn | 2092196   | 2094795   | + | HORVU0Hr1G000340 |        |
| chrUn | 7499051   | 7499564   | - | HORVU0Hr1G001420 |        |

|       |           |           |   |                  |        |
|-------|-----------|-----------|---|------------------|--------|
| chrUn | 7503092   | 7504913   | + | HORVU0Hr1G001430 |        |
| chrUn | 7507037   | 7511309   | - | HORVU0Hr1G001440 |        |
| chrUn | 7514888   | 7516723   | + | HORVU0Hr1G001450 | K14397 |
| chrUn | 7518568   | 7521884   | + | HORVU0Hr1G001460 |        |
| chrUn | 11134211  | 11134795  | - | HORVU0Hr1G002480 |        |
| chrUn | 30719336  | 30723028  | + | HORVU0Hr1G005570 |        |
| chrUn | 84272792  | 84274315  | - | HORVU0Hr1G015440 |        |
| chrUn | 86842236  | 86843359  | + | HORVU0Hr1G016180 | K06995 |
| chrUn | 86844210  | 86852751  | + | HORVU0Hr1G016190 |        |
| chrUn | 86854468  | 86857218  | + | HORVU0Hr1G016220 | K01537 |
| chrUn | 109690093 | 109695375 | + | HORVU0Hr1G020800 |        |
| chrUn | 109695370 | 109699020 | - | HORVU0Hr1G020810 |        |
| chrUn | 110178333 | 110179149 | + | HORVU0Hr1G021040 |        |
| chrUn | 110179208 | 110183094 | - | HORVU0Hr1G021050 |        |
| chrUn | 110183556 | 110187206 | - | HORVU0Hr1G021060 |        |
| chrUn | 113429049 | 113430432 | - | HORVU0Hr1G021850 |        |
| chrUn | 113431335 | 113434146 | + | HORVU0Hr1G021860 |        |
| chrUn | 113597769 | 113600997 | + | HORVU0Hr1G021960 | K05542 |
| chrUn | 113597770 | 113603041 | - | HORVU0Hr1G021970 |        |
| chrUn | 113603037 | 113607130 | + | HORVU0Hr1G021980 |        |
| chrUn | 113607305 | 113609587 | - | HORVU0Hr1G022000 |        |
| chrUn | 113609647 | 113610944 | - | HORVU0Hr1G022020 |        |
| chrUn | 114762265 | 114764964 | - | HORVU0Hr1G022480 |        |
| chrUn | 114767419 | 114770863 | - | HORVU0Hr1G022500 |        |
| chrUn | 114833807 | 114837176 | + | HORVU0Hr1G022570 |        |
| chrUn | 114837829 | 114842665 | + | HORVU0Hr1G022580 | K14831 |
| chrUn | 114845124 | 114896567 | + | HORVU0Hr1G022590 |        |
| chrUn | 116818257 | 116823079 | + | HORVU0Hr1G023200 |        |
| chrUn | 249627284 | 249629122 | - | HORVU0Hr1G040230 |        |
| chrUn | 249629274 | 249629895 | + | HORVU0Hr1G040240 |        |
| chrUn | 249631240 | 249632422 | + | HORVU0Hr1G040270 |        |
| chrUn | 249632640 | 249633128 | - | HORVU0Hr1G040280 |        |
| chrUn | 249633502 | 249634434 | - | HORVU0Hr1G040290 |        |
| chrUn | 249635218 | 249636470 | + | HORVU0Hr1G040300 |        |
| chrUn | 249636707 | 249641694 | + | HORVU0Hr1G040310 | K03012 |
| chrUn | 249636783 | 249641729 | - | HORVU0Hr1G040320 | K03012 |

**Table S12.** Selective genes between Wb-T and Cb-C.

| Chromosome | Start position | End position | Strand | Gene ID          | KEGG ID |
|------------|----------------|--------------|--------|------------------|---------|
| chr2H      | 39666071       | 39673442     | +      | HORVU2Hr1G017170 |         |
| chr2H      | 40313666       | 40315533     | -      | HORVU2Hr1G017300 |         |

|       |           |           |   |                  |        |
|-------|-----------|-----------|---|------------------|--------|
| chr2H | 50888142  | 50888963  | + | HORVU2Hr1G019580 |        |
| chr2H | 51955647  | 51957502  | + | HORVU2Hr1G019790 |        |
| chr2H | 125569689 | 125571566 | - | HORVU2Hr1G032360 |        |
| chr2H | 196889691 | 196892849 | - | HORVU2Hr1G040570 | K00873 |
| chr2H | 234820504 | 234831306 | + | HORVU2Hr1G044910 |        |
| chr2H | 582422103 | 582422183 | - | ENSRNA049439149  |        |
| chr2H | 582422344 | 582428411 | + | HORVU2Hr1G080370 | K01551 |
| chr2H | 599026212 | 599031507 | - | HORVU2Hr1G082590 |        |
| chr2H | 620401652 | 620404709 | - | HORVU2Hr1G085870 |        |
| chr2H | 620408029 | 620412655 | - | HORVU2Hr1G085880 | K11090 |
| chr2H | 620613412 | 620632316 | + | HORVU2Hr1G085910 |        |
| chr2H | 638240842 | 638242321 | - | HORVU2Hr1G089310 |        |
| chr2H | 640052177 | 640066173 | + | HORVU2Hr1G089630 |        |
| chr2H | 640052329 | 640066310 | - | HORVU2Hr1G089640 |        |
| chr2H | 640727115 | 640737542 | + | HORVU2Hr1G089830 |        |
| chr2H | 648515999 | 648516959 | - | HORVU2Hr1G091580 |        |
| chr2H | 649203485 | 649232890 | - | HORVU2Hr1G091680 |        |
| chr2H | 649733130 | 649736343 | + | HORVU2Hr1G091850 |        |
| chr2H | 650773966 | 650775199 | - | HORVU2Hr1G092070 | K14488 |
| chr2H | 651528086 | 651534019 | - | HORVU2Hr1G092250 | K11498 |
| chr2H | 651534346 | 651540462 | - | HORVU2Hr1G092260 | K10728 |
| chr2H | 652416364 | 652419744 | + | HORVU2Hr1G092340 |        |
| chr2H | 653323469 | 653360286 | - | HORVU2Hr1G092420 |        |
| chr2H | 654157450 | 654168952 | - | HORVU2Hr1G092600 |        |
| chr2H | 668997933 | 669004655 | + | HORVU2Hr1G095210 | K09338 |
| chr2H | 669005028 | 669009842 | - | HORVU2Hr1G095220 | K10755 |
| chr2H | 669560144 | 669562123 | + | HORVU2Hr1G095390 |        |
| chr2H | 680332013 | 680337386 | - | HORVU2Hr1G097760 |        |
| chr2H | 685376486 | 685385984 | + | HORVU2Hr1G098860 |        |
| chr2H | 704386639 | 704387155 | - | HORVU2Hr1G104670 | K15032 |
| chr2H | 704387240 | 704387847 | - | HORVU2Hr1G104680 | K14156 |
| chr2H | 704389810 | 704392568 | + | HORVU2Hr1G104690 |        |
| chr2H | 704875529 | 704885840 | + | HORVU2Hr1G104900 |        |
| chr2H | 704886345 | 704891615 | + | HORVU2Hr1G104920 | K05387 |
| chr2H | 706342872 | 706346612 | - | HORVU2Hr1G105380 |        |
| chr2H | 706347266 | 706352048 | - | HORVU2Hr1G105390 |        |
| chr2H | 708177034 | 708179766 | - | HORVU2Hr1G105930 |        |
| chr2H | 708253613 | 708259832 | - | HORVU2Hr1G105980 |        |
| chr2H | 708262945 | 708266739 | - | HORVU2Hr1G106010 | K19985 |
| chr2H | 708558226 | 708561788 | + | HORVU2Hr1G106080 |        |
| chr2H | 708562341 | 708565774 | - | HORVU2Hr1G106090 |        |
| chr2H | 708637015 | 708689912 | - | HORVU2Hr1G106110 |        |
| chr2H | 710599715 | 710603129 | + | HORVU2Hr1G106810 |        |

|       |           |           |   |                  |        |
|-------|-----------|-----------|---|------------------|--------|
| chr2H | 710604987 | 710610388 | + | HORVU2Hr1G106820 |        |
| chr2H | 710833148 | 710844185 | - | HORVU2Hr1G106880 |        |
| chr2H | 714112939 | 714131564 | + | HORVU2Hr1G108380 |        |
| chr2H | 716480145 | 716484046 | - | HORVU2Hr1G109380 | K16298 |
| chr2H | 718430317 | 718437579 | - | HORVU2Hr1G109960 |        |
| chr2H | 720338804 | 720342575 | - | HORVU2Hr1G110580 | K15148 |
| chr2H | 721943807 | 721946820 | - | HORVU2Hr1G111070 |        |
| chr2H | 722484027 | 722488008 | - | HORVU2Hr1G111340 |        |
| chr2H | 723000994 | 723005790 | + | HORVU2Hr1G111530 |        |
| chr2H | 723652502 | 723658875 | - | HORVU2Hr1G111640 |        |
| chr2H | 724700867 | 724701548 | - | HORVU2Hr1G111990 | K15255 |
| chr2H | 724706982 | 724710722 | - | HORVU2Hr1G112000 |        |
| chr2H | 725822715 | 725826075 | - | HORVU2Hr1G112480 |        |
| chr2H | 726001105 | 726004354 | + | HORVU2Hr1G112580 | K05986 |
| chr2H | 726007333 | 726011807 | + | HORVU2Hr1G112590 |        |
| chr2H | 726010794 | 726015308 | - | HORVU2Hr1G112600 | K05986 |
| chr2H | 726018842 | 726034727 | - | HORVU2Hr1G112620 |        |
| chr2H | 727206601 | 727211591 | + | HORVU2Hr1G113050 |        |
| chr2H | 727208236 | 727216963 | - | HORVU2Hr1G113060 |        |
| chr2H | 728031852 | 728032855 | + | HORVU2Hr1G113300 |        |
| chr2H | 728037581 | 728038321 | + | HORVU2Hr1G113310 |        |
| chr2H | 728042593 | 728046120 | - | HORVU2Hr1G113320 | K14570 |
| chr2H | 728158118 | 728160470 | - | HORVU2Hr1G113330 |        |
| chr2H | 731302774 | 731306944 | + | HORVU2Hr1G114260 | K00864 |
| chr2H | 732543347 | 732556439 | - | HORVU2Hr1G114490 |        |
| chr2H | 732688460 | 732690886 | - | HORVU2Hr1G114610 | K19730 |
| chr2H | 732691119 | 732698865 | + | HORVU2Hr1G114640 | K13998 |
| chr2H | 732701181 | 732707697 | + | HORVU2Hr1G114660 |        |
| chr2H | 732704699 | 732706055 | - | HORVU2Hr1G114670 |        |
| chr2H | 735292922 | 735304274 | + | HORVU2Hr1G115690 | K00891 |
| chr2H | 735297582 | 735304406 | - | HORVU2Hr1G115700 | K00891 |
| chr2H | 735306656 | 735309864 | + | HORVU2Hr1G115710 |        |
| chr2H | 735380131 | 735382200 | - | HORVU2Hr1G115730 |        |
| chr2H | 738354470 | 738355057 | + | HORVU2Hr1G116570 | K20791 |
| chr2H | 739038891 | 739324196 | - | HORVU2Hr1G116880 |        |
| chr2H | 739334630 | 739335172 | - | HORVU2Hr1G117060 |        |
| chr2H | 739342287 | 739343776 | + | HORVU2Hr1G117070 | K07999 |
| chr2H | 742197934 | 742204374 | + | HORVU2Hr1G118320 |        |
| chr2H | 742206222 | 742207877 | - | HORVU2Hr1G118340 |        |
| chr2H | 742278295 | 742284032 | + | HORVU2Hr1G118410 | K23953 |
| chr2H | 742284835 | 742287234 | - | HORVU2Hr1G118420 |        |
| chr2H | 743137237 | 743140775 | + | HORVU2Hr1G118670 | K00869 |
| chr2H | 743141590 | 743144509 | - | HORVU2Hr1G118680 |        |

|       |           |           |   |                  |        |
|-------|-----------|-----------|---|------------------|--------|
| chr2H | 746557796 | 746557914 | + | ENSRNA049481293  |        |
| chr2H | 746560785 | 746560900 | + | ENSRNA049481304  |        |
| chr2H | 746562978 | 746567627 | - | HORVU2Hr1G119900 |        |
| chr2H | 746563699 | 746563814 | + | ENSRNA049481301  |        |
| chr2H | 746569148 | 746574176 | - | HORVU2Hr1G119920 |        |
| chr2H | 753391612 | 753392265 | - | HORVU2Hr1G122560 |        |
| chr2H | 753393466 | 753393972 | - | HORVU2Hr1G122570 |        |
| chr2H | 753395800 | 753397331 | + | HORVU2Hr1G122580 |        |
| chr2H | 753496840 | 753497543 | + | HORVU2Hr1G122630 |        |
| chr2H | 753497875 | 753501250 | + | HORVU2Hr1G122640 |        |
| chr2H | 753498170 | 753501261 | - | HORVU2Hr1G122650 |        |
| chr2H | 753502776 | 753505395 | + | HORVU2Hr1G122660 |        |
| chr2H | 753923725 | 753928860 | - | HORVU2Hr1G122850 |        |
| chr2H | 758674366 | 758675622 | - | HORVU2Hr1G124540 |        |
| chr2H | 758798962 | 758800868 | + | HORVU2Hr1G124610 |        |
| chr2H | 759279572 | 759283062 | + | HORVU2Hr1G124850 | K05906 |
| chr2H | 759290209 | 759292377 | - | HORVU2Hr1G124860 |        |
| chr2H | 765910275 | 765917856 | + | HORVU2Hr1G127090 |        |
| chr2H | 765910275 | 765919163 | - | HORVU2Hr1G127100 |        |
| chr2H | 765936571 | 765937404 | - | HORVU2Hr1G127120 |        |
| chr2H | 765943371 | 765945953 | - | HORVU2Hr1G127130 |        |
| chr2H | 767240974 | 767272689 | + | HORVU2Hr1G127440 |        |
| chr3H | 1501667   | 1503269   | + | HORVU3Hr1G000560 |        |
| chr3H | 1505375   | 1508124   | + | HORVU3Hr1G000570 | K00052 |
| chr3H | 1510612   | 1510696   | - | ENSRNA049434181  |        |
| chr3H | 1511897   | 1518900   | - | HORVU3Hr1G000580 | K22544 |
| chr3H | 11698452  | 11703468  | + | HORVU3Hr1G004510 | K24736 |
| chr3H | 13428510  | 13434368  | + | HORVU3Hr1G005400 |        |
| chr3H | 13434376  | 13438303  | - | HORVU3Hr1G005410 |        |
| chr3H | 13440000  | 13443931  | + | HORVU3Hr1G005420 |        |
| chr3H | 13445141  | 13448185  | - | HORVU3Hr1G005430 | K04506 |
| chr3H | 14008525  | 14009025  | + | HORVU3Hr1G005700 |        |
| chr3H | 14107206  | 14111742  | - | HORVU3Hr1G005770 |        |
| chr3H | 14114434  | 14117915  | + | HORVU3Hr1G005780 |        |
| chr3H | 14192104  | 14193862  | + | HORVU3Hr1G005820 |        |
| chr3H | 14202606  | 14205398  | - | HORVU3Hr1G005830 |        |
| chr3H | 14864392  | 14865434  | + | HORVU3Hr1G005980 | K22856 |
| chr3H | 15206021  | 15208412  | + | HORVU3Hr1G006180 | K01213 |
| chr3H | 15212799  | 15215795  | + | HORVU3Hr1G006200 |        |
| chr3H | 15250416  | 15253110  | + | HORVU3Hr1G006230 | K23754 |
| chr3H | 15253191  | 15254140  | + | HORVU3Hr1G006240 | K15803 |
| chr3H | 15255304  | 15258498  | - | HORVU3Hr1G006250 |        |
| chr3H | 15300748  | 15302081  | - | HORVU3Hr1G006310 |        |

|       |           |           |   |                  |        |
|-------|-----------|-----------|---|------------------|--------|
| chr3H | 15309409  | 15320174  | + | HORVU3Hr1G006320 |        |
| chr3H | 17175802  | 17177553  | + | HORVU3Hr1G007060 |        |
| chr3H | 17261086  | 17261893  | + | HORVU3Hr1G007070 |        |
| chr3H | 17267754  | 17270761  | + | HORVU3Hr1G007080 | K15139 |
| chr3H | 17421800  | 17421872  | - | ENSRNA049434223  |        |
| chr3H | 17955161  | 17955355  | - | HORVU3Hr1G007530 |        |
| chr3H | 17959927  | 17980985  | - | HORVU3Hr1G007540 |        |
| chr3H | 19016502  | 19019476  | + | HORVU3Hr1G008400 |        |
| chr3H | 19022221  | 19025999  | - | HORVU3Hr1G008420 |        |
| chr3H | 20026353  | 20201668  | - | HORVU3Hr1G009360 |        |
| chr3H | 20026465  | 20201833  | + | HORVU3Hr1G009370 |        |
| chr3H | 20503965  | 20505366  | + | HORVU3Hr1G009560 |        |
| chr3H | 23089798  | 23098821  | + | HORVU3Hr1G010460 |        |
| chr3H | 23092314  | 23099614  | - | HORVU3Hr1G010470 |        |
| chr3H | 23309016  | 23315926  | - | HORVU3Hr1G010570 | K14638 |
| chr3H | 24938037  | 24942947  | + | HORVU3Hr1G011540 | K23871 |
| chr3H | 24949143  | 24952430  | + | HORVU3Hr1G011560 | K15414 |
| chr3H | 30655192  | 30662805  | + | HORVU3Hr1G013820 | K13176 |
| chr3H | 30922678  | 30926507  | + | HORVU3Hr1G013860 |        |
| chr3H | 30927341  | 30935804  | - | HORVU3Hr1G013880 | K10527 |
| chr3H | 32215742  | 32220605  | - | HORVU3Hr1G014120 |        |
| chr3H | 32229816  | 32232000  | - | HORVU3Hr1G014140 |        |
| chr3H | 33511574  | 33514482  | + | HORVU3Hr1G014580 | K12198 |
| chr3H | 34669953  | 34674574  | + | HORVU3Hr1G014890 | K13457 |
| chr3H | 36651148  | 36659153  | - | HORVU3Hr1G015570 | K15027 |
| chr3H | 38304662  | 38308839  | + | HORVU3Hr1G016000 | K03845 |
| chr3H | 38309028  | 38316910  | + | HORVU3Hr1G016010 | K10684 |
| chr3H | 47009339  | 47013112  | - | HORVU3Hr1G018130 | K14809 |
| chr3H | 52590346  | 52593305  | + | HORVU3Hr1G019240 |        |
| chr3H | 52596223  | 52605278  | - | HORVU3Hr1G019260 |        |
| chr3H | 57508046  | 57511540  | - | HORVU3Hr1G019770 |        |
| chr3H | 61065898  | 61070706  | + | HORVU3Hr1G020100 |        |
| chr3H | 63256964  | 63266250  | + | HORVU3Hr1G020340 | K09272 |
| chr3H | 63436467  | 63441228  | - | HORVU3Hr1G020400 |        |
| chr3H | 64380575  | 64394865  | + | HORVU3Hr1G020580 |        |
| chr3H | 65663711  | 65671005  | + | HORVU3Hr1G020810 |        |
| chr3H | 65673316  | 65675317  | + | HORVU3Hr1G020830 | K22684 |
| chr3H | 65673316  | 65687992  | - | HORVU3Hr1G020840 |        |
| chr3H | 66851391  | 66851461  | - | ENSRNA049434451  |        |
| chr3H | 78237356  | 78239333  | - | HORVU3Hr1G022260 |        |
| chr3H | 78241796  | 78243136  | - | HORVU3Hr1G022270 |        |
| chr3H | 111849654 | 111854296 | - | HORVU3Hr1G026870 |        |
| chr3H | 113622335 | 113629361 | + | HORVU3Hr1G027070 |        |

|       |           |           |   |                  |        |
|-------|-----------|-----------|---|------------------|--------|
| chr3H | 118267916 | 118270871 | + | HORVU3Hr1G027470 |        |
| chr3H | 119233220 | 119249031 | + | HORVU3Hr1G027580 |        |
| chr3H | 134887089 | 134891126 | + | HORVU3Hr1G029320 | K03627 |
| chr3H | 142551261 | 142552617 | + | HORVU3Hr1G030150 |        |
| chr3H | 160759519 | 160760457 | + | HORVU3Hr1G031900 |        |
| chr3H | 160765584 | 160769048 | - | HORVU3Hr1G031930 |        |
| chr3H | 162893194 | 162896873 | - | HORVU3Hr1G032110 |        |
| chr3H | 174823674 | 174829266 | + | HORVU3Hr1G033350 | K23166 |
| chr3H | 174829790 | 174830461 | + | HORVU3Hr1G033360 |        |
| chr3H | 209705434 | 209707313 | - | HORVU3Hr1G037030 |        |
| chr3H | 209708379 | 209712895 | - | HORVU3Hr1G037040 |        |
| chr3H | 209724469 | 209728558 | + | HORVU3Hr1G037050 |        |
| chr3H | 212000808 | 212019643 | + | HORVU3Hr1G037310 |        |
| chr3H | 213937394 | 213943684 | + | HORVU3Hr1G037600 | K13447 |
| chr3H | 215058374 | 215065252 | - | HORVU3Hr1G037780 | K23678 |
| chr3H | 216207971 | 216208192 | - | HORVU3Hr1G037870 |        |
| chr3H | 216208340 | 216208702 | - | HORVU3Hr1G037880 |        |
| chr3H | 216208892 | 216209068 | - | HORVU3Hr1G037890 |        |
| chr3H | 219053861 | 219059045 | - | HORVU3Hr1G038060 |        |
| chr3H | 219970698 | 219977303 | + | HORVU3Hr1G038200 |        |
| chr3H | 424270621 | 424275307 | + | HORVU3Hr1G056650 |        |
| chr3H | 431180711 | 431184807 | - | HORVU3Hr1G057440 |        |
| chr3H | 432097070 | 432118808 | - | HORVU3Hr1G057530 |        |
| chr3H | 438233271 | 438235842 | + | HORVU3Hr1G058150 |        |
| chr3H | 446058318 | 446062780 | - | HORVU3Hr1G059060 | K00031 |
| chr3H | 447236706 | 447245971 | + | HORVU3Hr1G059140 | K01897 |
| chr3H | 479983413 | 480017371 | - | HORVU3Hr1G062760 |        |
| chr3H | 482165393 | 482176766 | + | HORVU3Hr1G063050 | K00264 |
| chr3H | 482884414 | 482889270 | + | HORVU3Hr1G063250 |        |
| chr3H | 493841629 | 493847850 | + | HORVU3Hr1G064740 | K01056 |
| chr3H | 494195872 | 494209570 | - | HORVU3Hr1G064750 |        |
| chr3H | 494198593 | 494199879 | + | HORVU3Hr1G064760 |        |
| chr3H | 497609992 | 497617860 | + | HORVU3Hr1G065260 | K05658 |
| chr3H | 498131674 | 498136884 | + | HORVU3Hr1G065350 |        |
| chr3H | 498131881 | 498136937 | - | HORVU3Hr1G065360 | K05389 |
| chr3H | 507036443 | 507063465 | + | HORVU3Hr1G066700 |        |
| chr3H | 543667426 | 543667944 | - | HORVU3Hr1G072000 |        |
| chr3H | 552738456 | 552750250 | + | HORVU3Hr1G073220 |        |
| chr3H | 558953626 | 558953697 | - | ENSRNA049436027  |        |
| chr3H | 558953771 | 558953844 | - | ENSRNA049436036  |        |
| chr3H | 558954084 | 558957766 | + | HORVU3Hr1G074620 | K01285 |
| chr3H | 559136249 | 559136491 | - | HORVU3Hr1G074670 |        |
| chr3H | 559145074 | 559148685 | - | HORVU3Hr1G074680 |        |

|       |           |           |   |                  |        |
|-------|-----------|-----------|---|------------------|--------|
| chr3H | 559794503 | 559801078 | + | HORVU3Hr1G074770 | K12617 |
| chr3H | 561431835 | 561438847 | + | HORVU3Hr1G075050 |        |
| chr3H | 562266303 | 562282316 | + | HORVU3Hr1G075220 |        |
| chr3H | 563053326 | 563061504 | + | HORVU3Hr1G075340 |        |
| chr3H | 564770923 | 564779425 | - | HORVU3Hr1G075540 |        |
| chr3H | 567578333 | 567582966 | + | HORVU3Hr1G076060 | K22390 |
| chr3H | 574246394 | 574247535 | - | HORVU3Hr1G077660 |        |
| chr3H | 575421996 | 575424645 | + | HORVU3Hr1G077960 | K03113 |
| chr3H | 576142004 | 576149293 | - | HORVU3Hr1G078090 | K00074 |
| chr3H | 576142353 | 576146580 | + | HORVU3Hr1G078100 | K00074 |
| chr3H | 578142357 | 578143352 | + | HORVU3Hr1G078420 | K06981 |
| chr3H | 578461509 | 578465414 | + | HORVU3Hr1G078490 |        |
| chr3H | 578730032 | 578860260 | - | HORVU3Hr1G078530 |        |
| chr3H | 580440661 | 580444139 | + | HORVU3Hr1G078820 |        |
| chr3H | 580440772 | 580443838 | - | HORVU3Hr1G078830 |        |
| chr3H | 581094773 | 581098244 | + | HORVU3Hr1G078940 | K07375 |
| chr3H | 582534472 | 582542774 | + | HORVU3Hr1G079270 | K00109 |
| chr3H | 583337677 | 583341550 | + | HORVU3Hr1G079440 | K24405 |
| chr3H | 583341763 | 583346358 | - | HORVU3Hr1G079450 |        |
| chr3H | 586480063 | 586481307 | - | HORVU3Hr1G080010 | K00326 |
| chr3H | 589362224 | 589366802 | + | HORVU3Hr1G080530 | K15633 |
| chr3H | 590802757 | 590806060 | + | HORVU3Hr1G080810 |        |
| chr3H | 590806885 | 590818660 | - | HORVU3Hr1G080820 |        |
| chr3H | 590910969 | 590914623 | - | HORVU3Hr1G080830 | K00487 |
| chr3H | 593197380 | 593201865 | + | HORVU3Hr1G081100 |        |
| chr3H | 595660559 | 595667334 | - | HORVU3Hr1G081660 |        |
| chr3H | 598334946 | 598337882 | + | HORVU3Hr1G082230 | K22733 |
| chr3H | 598337922 | 598346861 | - | HORVU3Hr1G082240 |        |
| chr3H | 598788471 | 598796755 | + | HORVU3Hr1G082310 | K12619 |
| chr3H | 598809309 | 598810131 | + | HORVU3Hr1G082320 |        |
| chr3H | 599122576 | 599125180 | + | HORVU3Hr1G082460 |        |
| chr3H | 601470215 | 601474659 | + | HORVU3Hr1G083090 | K14948 |
| chr3H | 601475494 | 601480058 | - | HORVU3Hr1G083110 |        |
| chr3H | 602089588 | 602094803 | + | HORVU3Hr1G083180 | K22943 |
| chr3H | 602659829 | 602660254 | - | HORVU3Hr1G083280 |        |
| chr3H | 602773272 | 602776454 | + | HORVU3Hr1G083300 | K12622 |
| chr3H | 604261977 | 604267781 | + | HORVU3Hr1G083540 |        |
| chr3H | 604263642 | 604267797 | - | HORVU3Hr1G083550 | K22745 |
| chr3H | 605209510 | 605218490 | - | HORVU3Hr1G083780 |        |
| chr3H | 605212593 | 605212672 | - | ENSRNA049436258  |        |
| chr3H | 605212795 | 605218151 | + | HORVU3Hr1G083790 | K17917 |
| chr3H | 605220151 | 605221405 | + | HORVU3Hr1G083800 |        |
| chr3H | 606305501 | 606306847 | + | HORVU3Hr1G084110 |        |

|       |           |           |   |                  |        |
|-------|-----------|-----------|---|------------------|--------|
| chr3H | 606309479 | 606311167 | + | HORVU3Hr1G084120 |        |
| chr3H | 606318504 | 606326254 | - | HORVU3Hr1G084170 |        |
| chr3H | 606519570 | 606522571 | - | HORVU3Hr1G084260 |        |
| chr3H | 606944820 | 606948009 | - | HORVU3Hr1G084310 | K02865 |
| chr3H | 607296280 | 607298550 | + | HORVU3Hr1G084380 |        |
| chr3H | 607571715 | 607573675 | - | HORVU3Hr1G084410 |        |
| chr3H | 607582405 | 607586340 | - | HORVU3Hr1G084420 |        |
| chr3H | 608249205 | 608253045 | + | HORVU3Hr1G084520 | K12873 |
| chr3H | 608253179 | 608257632 | + | HORVU3Hr1G084530 |        |
| chr3H | 608257844 | 608263105 | - | HORVU3Hr1G084540 |        |
| chr3H | 611543439 | 611547591 | - | HORVU3Hr1G085210 | K13463 |
| chr3H | 612001045 | 612007393 | - | HORVU3Hr1G085320 |        |
| chr3H | 612482009 | 612482425 | - | HORVU3Hr1G085340 |        |
| chr3H | 612487276 | 612491283 | + | HORVU3Hr1G085350 |        |
| chr3H | 612492738 | 612496699 | + | HORVU3Hr1G085360 |        |
| chr3H | 612819203 | 612827928 | + | HORVU3Hr1G085460 |        |
| chr3H | 613897934 | 613903093 | - | HORVU3Hr1G085720 |        |
| chr3H | 614506659 | 614516560 | + | HORVU3Hr1G085820 | K00966 |
| chr3H | 614506741 | 614516670 | - | HORVU3Hr1G085830 | K00966 |
| chr3H | 618052174 | 618055308 | + | HORVU3Hr1G086630 | K02879 |
| chr3H | 618056041 | 618060093 | + | HORVU3Hr1G086650 |        |
| chr3H | 621227948 | 621233457 | - | HORVU3Hr1G087470 |        |
| chr3H | 656380934 | 656386027 | + | HORVU3Hr1G097680 |        |
| chr3H | 677734589 | 677740710 | + | HORVU3Hr1G109370 |        |
| chr3H | 679253174 | 679260455 | + | HORVU3Hr1G109740 |        |
| chr5H | 23245645  | 23247052  | - | HORVU5Hr1G009600 | K02920 |
| chr5H | 23346295  | 23348364  | + | HORVU5Hr1G009610 |        |
| chr5H | 38555667  | 38562124  | + | HORVU5Hr1G012770 | K00547 |
| chr5H | 38557723  | 38562136  | - | HORVU5Hr1G012780 | K00547 |
| chr5H | 81572972  | 81576544  | - | HORVU5Hr1G019100 |        |
| chr5H | 96618827  | 96627750  | - | HORVU5Hr1G020800 |        |
| chr5H | 130588927 | 130594377 | - | HORVU5Hr1G024340 | K00850 |
| chr5H | 167331874 | 167339562 | + | HORVU5Hr1G028360 | K03263 |
| chr5H | 169904862 | 169914285 | + | HORVU5Hr1G028770 | K09506 |
| chr5H | 169909813 | 169911039 | + | HORVU5Hr1G028780 |        |
| chr5H | 184424429 | 184440566 | - | HORVU5Hr1G030040 |        |
| chr5H | 242763832 | 242768228 | + | HORVU5Hr1G035220 |        |
| chr5H | 246407973 | 246427633 | - | HORVU5Hr1G035440 |        |
| chr5H | 246411822 | 246411974 | + | HORVU5Hr1G035470 |        |
| chr5H | 266750649 | 266750726 | + | ENSRNA049475627  |        |
| chr5H | 266751365 | 266752357 | - | HORVU5Hr1G037150 |        |
| chr5H | 266753711 | 266763867 | + | HORVU5Hr1G037160 | K17545 |
| chr5H | 266762421 | 266773231 | - | HORVU5Hr1G037200 |        |

|       |           |           |   |                  |        |
|-------|-----------|-----------|---|------------------|--------|
| chr5H | 270203770 | 270207437 | - | HORVU5Hr1G037600 | K03686 |
| chr5H | 273896608 | 273897854 | + | HORVU5Hr1G037890 |        |
| chr5H | 273898538 | 273915692 | - | HORVU5Hr1G037910 |        |
| chr5H | 273913641 | 273942237 | + | HORVU5Hr1G037920 |        |
| chr5H | 280775389 | 280777976 | + | HORVU5Hr1G038920 | K02997 |
| chr5H | 284176627 | 284183906 | + | HORVU5Hr1G039210 |        |
| chr5H | 286183119 | 286184251 | - | HORVU5Hr1G039400 |        |
| chr5H | 286690669 | 286711619 | + | HORVU5Hr1G039430 |        |
| chr5H | 288433498 | 288439832 | + | HORVU5Hr1G039620 |        |
| chr5H | 290716942 | 290720528 | + | HORVU5Hr1G039850 | K10355 |
| chr5H | 293329487 | 293336347 | + | HORVU5Hr1G040040 |        |
| chr5H | 293336044 | 293339459 | - | HORVU5Hr1G040050 | K00416 |
| chr5H | 295088520 | 295090806 | - | HORVU5Hr1G040160 |        |
| chr5H | 296068400 | 296073717 | + | HORVU5Hr1G040190 |        |
| chr5H | 296724701 | 296734969 | + | HORVU5Hr1G040210 |        |
| chr5H | 301880519 | 301885577 | + | HORVU5Hr1G040540 |        |
| chr5H | 315391439 | 315396861 | - | HORVU5Hr1G041530 |        |
| chr5H | 348281526 | 348288722 | - | HORVU5Hr1G045020 |        |
| chr5H | 349058357 | 349066233 | + | HORVU5Hr1G045150 | K01209 |
| chr5H | 349701419 | 349705399 | - | HORVU5Hr1G045180 | K14432 |
| chr5H | 357322486 | 357326766 | + | HORVU5Hr1G045930 |        |
| chr5H | 359517904 | 359532721 | - | HORVU5Hr1G046250 |        |
| chr5H | 359527202 | 359529307 | + | HORVU5Hr1G046260 |        |
| chr5H | 359535548 | 359536767 | - | HORVU5Hr1G046280 |        |
| chr5H | 361462479 | 361467032 | - | HORVU5Hr1G046490 |        |
| chr5H | 416429927 | 416435918 | - | HORVU5Hr1G053150 |        |
| chr5H | 464320300 | 464336491 | + | HORVU5Hr1G059430 |        |
| chr5H | 480973094 | 480984107 | + | HORVU5Hr1G061530 |        |
| chr5H | 480978299 | 480996766 | - | HORVU5Hr1G061540 |        |
| chr5H | 483236263 | 483236977 | - | HORVU5Hr1G062080 | K01520 |
| chr5H | 483237696 | 483244300 | + | HORVU5Hr1G062090 | K14085 |
| chr5H | 484372038 | 484375692 | + | HORVU5Hr1G062220 |        |
| chr5H | 565764418 | 565774332 | + | HORVU5Hr1G081790 |        |
| chr5H | 581801752 | 581806256 | - | HORVU5Hr1G088430 |        |
| chr5H | 608567838 | 608568942 | + | HORVU5Hr1G098710 |        |
| chr5H | 608578257 | 608580493 | - | HORVU5Hr1G098720 |        |
| chr5H | 608584118 | 608584590 | + | HORVU5Hr1G098730 |        |
| chr5H | 618537775 | 618542148 | - | HORVU5Hr1G104200 |        |
| chr5H | 626123504 | 626124759 | + | HORVU5Hr1G107180 |        |
| chr5H | 626125556 | 626133605 | + | HORVU5Hr1G107190 |        |
| chr5H | 626140764 | 626142586 | + | HORVU5Hr1G107210 | K03671 |
| chr5H | 634566325 | 634568382 | - | HORVU5Hr1G110940 |        |
| chr5H | 639807894 | 639809373 | + | HORVU5Hr1G112580 |        |

|       |           |           |   |                  |        |
|-------|-----------|-----------|---|------------------|--------|
| chr5H | 640025889 | 640030224 | - | HORVU5Hr1G112710 |        |
| chr5H | 640375896 | 640380995 | + | HORVU5Hr1G112850 |        |
| chr5H | 642237666 | 642240639 | + | HORVU5Hr1G113620 |        |
| chr5H | 642240822 | 642246866 | - | HORVU5Hr1G113630 |        |
| chr5H | 642937025 | 642939601 | - | HORVU5Hr1G113950 |        |
| chr5H | 643367175 | 643367993 | - | HORVU5Hr1G114190 |        |
| chr5H | 643377919 | 643378912 | + | HORVU5Hr1G114200 |        |
| chr5H | 643433504 | 643436058 | - | HORVU5Hr1G114250 | K07904 |
| chr5H | 643444530 | 643447569 | + | HORVU5Hr1G114260 |        |
| chr5H | 644028373 | 644028732 | - | HORVU5Hr1G114520 |        |
| chr5H | 644035801 | 644039389 | - | HORVU5Hr1G114530 | K19882 |
| chr5H | 646681145 | 646686179 | + | HORVU5Hr1G115490 |        |
| chr5H | 646682608 | 646686179 | - | HORVU5Hr1G115500 |        |
| chr5H | 646848440 | 646853969 | + | HORVU5Hr1G115530 |        |
| chr5H | 647629286 | 647630979 | + | HORVU5Hr1G116310 |        |
| chr5H | 653908194 | 653918421 | + | HORVU5Hr1G118860 |        |
| chr5H | 657762006 | 657770015 | - | HORVU5Hr1G120520 |        |
| chr5H | 657767507 | 657767578 | + | ENSRNA049443290  |        |
| chr5H | 658376226 | 658378900 | - | HORVU5Hr1G120800 | K06911 |
| chr5H | 661995105 | 661999262 | + | HORVU5Hr1G122350 |        |
| chr5H | 662606046 | 662611272 | + | HORVU5Hr1G122640 | K11092 |
| chr5H | 662742090 | 662744634 | + | HORVU5Hr1G122750 |        |
| chr5H | 662745649 | 662958544 | + | HORVU5Hr1G122760 |        |
| chr5H | 662806066 | 662812892 | + | HORVU5Hr1G122810 |        |
| chr5H | 662814297 | 662817523 | + | HORVU5Hr1G122820 |        |
| chr5H | 663355222 | 663363898 | + | HORVU5Hr1G123080 |        |
| chr5H | 663395230 | 663397277 | - | HORVU5Hr1G123150 |        |
| chr5H | 663397690 | 663402446 | - | HORVU5Hr1G123160 | K13989 |
| chr5H | 663496644 | 663500015 | - | HORVU5Hr1G123240 |        |
| chr5H | 663885157 | 663889732 | + | HORVU5Hr1G123370 | K14403 |
| chr5H | 665176518 | 665181669 | - | HORVU5Hr1G124090 |        |
| chr7H | 2209634   | 2212132   | + | HORVU7Hr1G001010 |        |
| chr7H | 2209871   | 2353258   | - | HORVU7Hr1G001020 |        |
| chr7H | 3848027   | 3856319   | + | HORVU7Hr1G001830 |        |
| chr7H | 4094645   | 4097230   | + | HORVU7Hr1G002090 |        |
| chr7H | 4101379   | 4104133   | + | HORVU7Hr1G002110 |        |
| chr7H | 4108971   | 4109165   | - | ENSRNA049489220  |        |
| chr7H | 4109856   | 4110159   | - | ENSRNA049489215  |        |
| chr7H | 4278136   | 4283136   | + | HORVU7Hr1G002200 | K02641 |
| chr7H | 4279678   | 4283236   | - | HORVU7Hr1G002210 | K02641 |
| chr7H | 8358004   | 8367149   | + | HORVU7Hr1G006370 |        |
| chr7H | 41832522  | 41834863  | - | HORVU7Hr1G025380 |        |
| chr7H | 41834939  | 41841912  | - | HORVU7Hr1G025390 |        |

|       |           |           |   |                  |        |
|-------|-----------|-----------|---|------------------|--------|
| chr7H | 41843877  | 41845648  | - | HORVU7Hr1G025400 |        |
| chr7H | 42673891  | 42673962  | + | ENSRNA049442250  |        |
| chr7H | 42674384  | 42674455  | + | ENSRNA049442241  |        |
| chr7H | 42684121  | 42690645  | - | HORVU7Hr1G025620 |        |
| chr7H | 42695636  | 42700024  | + | HORVU7Hr1G025650 |        |
| chr7H | 42700406  | 42700477  | - | ENSRNA049440354  |        |
| chr7H | 42957041  | 42958811  | - | HORVU7Hr1G025720 | K09422 |
| chr7H | 42960311  | 42964316  | + | HORVU7Hr1G025730 | K24418 |
| chr7H | 53818355  | 53824943  | + | HORVU7Hr1G028910 |        |
| chr7H | 53823972  | 53827605  | - | HORVU7Hr1G028920 |        |
| chr7H | 54080027  | 54083868  | + | HORVU7Hr1G029060 |        |
| chr7H | 62540594  | 62540770  | + | HORVU7Hr1G030990 |        |
| chr7H | 62540774  | 62541217  | + | HORVU7Hr1G031000 |        |
| chr7H | 62541536  | 62541691  | + | HORVU7Hr1G031010 |        |
| chr7H | 62744251  | 62752110  | + | HORVU7Hr1G031100 | K14311 |
| chr7H | 65632288  | 65636503  | - | HORVU7Hr1G032070 |        |
| chr7H | 65639396  | 65647425  | - | HORVU7Hr1G032080 | K12818 |
| chr7H | 91967526  | 91970897  | + | HORVU7Hr1G037910 |        |
| chr7H | 99963282  | 99965890  | - | HORVU7Hr1G038820 |        |
| chr7H | 102935178 | 102937837 | + | HORVU7Hr1G039320 | K03439 |
| chr7H | 102935489 | 102939889 | - | HORVU7Hr1G039330 | K03439 |
| chr7H | 103566716 | 103569555 | - | HORVU7Hr1G039440 | K03134 |
| chr7H | 103630064 | 103630999 | - | HORVU7Hr1G039460 |        |
| chr7H | 106400469 | 106420985 | + | HORVU7Hr1G039850 |        |
| chr7H | 109373213 | 109374520 | - | HORVU7Hr1G040370 | K08912 |
| chr7H | 109380119 | 109381636 | - | HORVU7Hr1G040380 |        |
| chr7H | 109382547 | 109389554 | - | HORVU7Hr1G040390 |        |
| chr7H | 120221128 | 120224149 | + | HORVU7Hr1G042110 |        |
| chr7H | 120221217 | 120225757 | - | HORVU7Hr1G042120 | K14638 |
| chr7H | 120352822 | 120355429 | - | HORVU7Hr1G042130 | K01512 |
| chr7H | 142388902 | 142396963 | + | HORVU7Hr1G045240 |        |
| chr7H | 143690820 | 143696411 | + | HORVU7Hr1G045350 |        |
| chr7H | 144284135 | 144291911 | + | HORVU7Hr1G045550 |        |
| chr7H | 144289836 | 144293353 | - | HORVU7Hr1G045580 |        |
| chr7H | 146582057 | 146582296 | - | HORVU7Hr1G045750 |        |
| chr7H | 146585894 | 146590335 | + | HORVU7Hr1G045770 | K16732 |
| chr7H | 149875814 | 149879925 | + | HORVU7Hr1G046250 | K01188 |
| chr7H | 149880190 | 149883832 | - | HORVU7Hr1G046270 |        |
| chr7H | 149883969 | 149885304 | + | HORVU7Hr1G046280 |        |
| chr7H | 150238886 | 150248647 | + | HORVU7Hr1G046290 |        |
| chr7H | 215393894 | 215397163 | + | HORVU7Hr1G054190 |        |
| chr7H | 233957547 | 233961150 | + | HORVU7Hr1G056230 |        |
| chr7H | 233961100 | 233963281 | - | HORVU7Hr1G056240 | K01802 |

|       |           |           |   |                  |        |
|-------|-----------|-----------|---|------------------|--------|
| chr7H | 234654877 | 234669226 | - | HORVU7Hr1G056410 |        |
| chr7H | 234665154 | 234712484 | + | HORVU7Hr1G056420 |        |
| chr7H | 235074749 | 235077901 | + | HORVU7Hr1G056450 |        |
| chr7H | 235075668 | 235080845 | - | HORVU7Hr1G056460 | K15191 |
| chr7H | 235388068 | 235395343 | - | HORVU7Hr1G056470 |        |
| chr7H | 236127458 | 236134439 | + | HORVU7Hr1G056490 |        |
| chr7H | 237161371 | 237174117 | + | HORVU7Hr1G056570 |        |
| chr7H | 237647324 | 237651565 | + | HORVU7Hr1G056590 | K01641 |
| chr7H | 237946753 | 237949777 | - | HORVU7Hr1G056600 |        |
| chr7H | 238440698 | 238446807 | + | HORVU7Hr1G056630 |        |
| chr7H | 238655386 | 238656052 | + | HORVU7Hr1G056650 |        |
| chr7H | 238656122 | 238662065 | - | HORVU7Hr1G056660 |        |
| chr7H | 240513113 | 240531374 | + | HORVU7Hr1G056770 |        |
| chr7H | 240520656 | 240521269 | + | HORVU7Hr1G056780 |        |
| chr7H | 240628874 | 240631292 | + | HORVU7Hr1G056790 |        |
| chr7H | 242561602 | 242565943 | + | HORVU7Hr1G056910 |        |
| chr7H | 243535369 | 243549081 | + | HORVU7Hr1G057010 |        |
| chr7H | 247684936 | 247687293 | - | HORVU7Hr1G057280 |        |
| chr7H | 247694774 | 247695889 | - | HORVU7Hr1G057290 | K03301 |
| chr7H | 248143264 | 248146274 | + | HORVU7Hr1G057310 | K19045 |
| chr7H | 248580108 | 248581914 | + | HORVU7Hr1G057330 |        |
| chr7H | 248978165 | 248980455 | - | HORVU7Hr1G057350 |        |
| chr7H | 249987945 | 249993911 | + | HORVU7Hr1G057390 |        |
| chr7H | 250591388 | 250596270 | + | HORVU7Hr1G057430 | K00434 |
| chr7H | 251131641 | 251134363 | - | HORVU7Hr1G057470 |        |
| chr7H | 255291641 | 255295975 | + | HORVU7Hr1G058060 |        |
| chr7H | 255333368 | 255334106 | + | HORVU7Hr1G058070 |        |
| chr7H | 255335961 | 255342936 | + | HORVU7Hr1G058080 |        |
| chr7H | 255345089 | 255349794 | + | HORVU7Hr1G058090 | K18195 |
| chr7H | 258860422 | 258866854 | - | HORVU7Hr1G058360 |        |
| chr7H | 260597062 | 260597722 | - | HORVU7Hr1G058720 |        |
| chr7H | 260598567 | 260607607 | - | HORVU7Hr1G058730 | K08232 |
| chr7H | 260912236 | 260917644 | - | HORVU7Hr1G058750 |        |
| chr7H | 260916805 | 260921420 | + | HORVU7Hr1G058760 | K25307 |
| chr7H | 260920818 | 260922470 | - | HORVU7Hr1G058770 |        |
| chr7H | 261793143 | 261795118 | + | HORVU7Hr1G058860 | K01517 |
| chr7H | 261801075 | 261802127 | + | HORVU7Hr1G058900 |        |
| chr7H | 263804676 | 263807137 | + | HORVU7Hr1G059090 | K02865 |
| chr7H | 264045880 | 264047843 | - | HORVU7Hr1G059190 |        |
| chr7H | 264053847 | 264061164 | - | HORVU7Hr1G059220 | K10398 |
| chr7H | 264054465 | 264057015 | + | HORVU7Hr1G059230 |        |
| chr7H | 265435033 | 265435950 | + | HORVU7Hr1G059290 | K22255 |
| chr7H | 265667640 | 265670302 | + | HORVU7Hr1G059320 | K12733 |

|       |           |           |   |                  |        |
|-------|-----------|-----------|---|------------------|--------|
| chr7H | 270642667 | 270647056 | - | HORVU7Hr1G059850 | K09646 |
| chr7H | 273940013 | 273953143 | - | HORVU7Hr1G060130 |        |
| chr7H | 275457995 | 275458504 | + | HORVU7Hr1G060220 |        |
| chr7H | 282128361 | 282138576 | + | HORVU7Hr1G060790 |        |
| chr7H | 284995960 | 285000564 | - | HORVU7Hr1G061180 |        |
| chr7H | 289708638 | 289720688 | - | HORVU7Hr1G061640 |        |
| chr7H | 300518692 | 300523227 | - | HORVU7Hr1G062400 |        |
| chr7H | 308189001 | 308194876 | - | HORVU7Hr1G063150 | K12822 |
| chr7H | 312097918 | 312104877 | + | HORVU7Hr1G063510 |        |
| chr7H | 314391517 | 314425666 | + | HORVU7Hr1G063720 |        |
| chr7H | 314399516 | 314400061 | - | HORVU7Hr1G063750 |        |
| chr7H | 314409375 | 314409915 | + | HORVU7Hr1G063770 |        |
| chr7H | 315905183 | 315918537 | - | HORVU7Hr1G063970 | K13126 |
| chr7H | 315920567 | 315922328 | - | HORVU7Hr1G063980 | K00392 |
| chr7H | 321635166 | 321636524 | + | HORVU7Hr1G064860 |        |
| chr7H | 333730513 | 333781184 | - | HORVU7Hr1G066170 |        |
| chr7H | 336285348 | 336309444 | - | HORVU7Hr1G066300 | K06636 |
| chr7H | 342078562 | 342095008 | - | HORVU7Hr1G066590 |        |
| chr7H | 343592862 | 343593277 | + | HORVU7Hr1G066740 |        |
| chr7H | 343596981 | 343600920 | - | HORVU7Hr1G066750 |        |
| chr7H | 346181113 | 346195444 | + | HORVU7Hr1G066930 |        |
| chr7H | 347129641 | 347132081 | + | HORVU7Hr1G067060 | K02873 |
| chr7H | 348270156 | 348270398 | + | HORVU7Hr1G067100 | K03358 |
| chr7H | 348272673 | 348276098 | - | HORVU7Hr1G067110 |        |
| chr7H | 350306493 | 350310404 | + | HORVU7Hr1G067200 |        |
| chr7H | 352048347 | 352050036 | + | HORVU7Hr1G067520 | K12581 |
| chr7H | 354110299 | 354144212 | - | HORVU7Hr1G067620 |        |
| chr7H | 354914497 | 354921990 | - | HORVU7Hr1G067710 |        |
| chr7H | 354925302 | 354925758 | + | HORVU7Hr1G067730 |        |
| chr7H | 357542424 | 357546443 | - | HORVU7Hr1G067950 |        |
| chr7H | 360255170 | 360279085 | - | HORVU7Hr1G068320 |        |
| chr7H | 361405465 | 361419175 | - | HORVU7Hr1G068410 |        |
| chr7H | 366099321 | 366227518 | - | HORVU7Hr1G068990 |        |
| chr7H | 367194699 | 367199111 | + | HORVU7Hr1G069070 |        |
| chr7H | 386642801 | 386646158 | + | HORVU7Hr1G070970 |        |
| chr7H | 400829251 | 400835819 | - | HORVU7Hr1G072050 |        |
| chr7H | 401049202 | 401096899 | - | HORVU7Hr1G072120 |        |
| chr7H | 402151029 | 402163440 | - | HORVU7Hr1G072240 |        |
| chr7H | 402159225 | 402159449 | + | HORVU7Hr1G072300 |        |
| chr7H | 444626348 | 444636100 | - | HORVU7Hr1G076160 | K22611 |
| chr7H | 450200080 | 450209793 | + | HORVU7Hr1G077000 |        |
| chr7H | 451171861 | 451177182 | + | HORVU7Hr1G077110 |        |
| chr7H | 621836594 | 621839030 | + | HORVU7Hr1G107080 | K12668 |

|       |           |           |   |                  |        |
|-------|-----------|-----------|---|------------------|--------|
| chr7H | 621839414 | 621842700 | - | HORVU7Hr1G107100 | K07375 |
| chr7H | 623284314 | 623284435 | - | ENSRNA049488666  |        |
| chr7H | 623284859 | 623291176 | - | HORVU7Hr1G107520 | K12735 |
| chr7H | 623413985 | 623419666 | + | HORVU7Hr1G107550 |        |
| chr7H | 623647717 | 623653945 | - | HORVU7Hr1G107700 |        |
| chr7H | 623658288 | 623662004 | - | HORVU7Hr1G107720 |        |
| chr7H | 623669799 | 623670056 | + | HORVU7Hr1G107730 |        |
| chr7H | 623887563 | 623895540 | + | HORVU7Hr1G107760 |        |
| chr7H | 623890892 | 623896987 | - | HORVU7Hr1G107770 | K11593 |
| chr7H | 625794100 | 625809365 | - | HORVU7Hr1G108600 |        |
| chr7H | 626156440 | 626200880 | + | HORVU7Hr1G108730 |        |
| chr7H | 626291758 | 626294967 | + | HORVU7Hr1G108780 | K14563 |
| chr7H | 626293156 | 626293230 | + | ENSRNA049488662  |        |
| chr7H | 626293486 | 626293560 | + | ENSRNA049488663  |        |
| chr7H | 626418473 | 626424722 | - | HORVU7Hr1G108890 |        |
| chr7H | 627296198 | 627297570 | + | HORVU7Hr1G109170 | K22683 |
| chr7H | 627298807 | 627305366 | + | HORVU7Hr1G109180 |        |
| chr7H | 627303101 | 627307263 | - | HORVU7Hr1G109190 |        |
| chr7H | 627313778 | 627314831 | - | HORVU7Hr1G109200 |        |
| chr7H | 627315504 | 627317238 | - | HORVU7Hr1G109210 |        |
| chr7H | 627501280 | 627503618 | + | HORVU7Hr1G109280 |        |
| chr7H | 627501855 | 627509102 | - | HORVU7Hr1G109290 |        |
| chr7H | 628034411 | 628038083 | + | HORVU7Hr1G109420 | K05756 |
| chr7H | 628247557 | 628248157 | - | HORVU7Hr1G109540 |        |
| chr7H | 628254382 | 628257576 | + | HORVU7Hr1G109550 |        |
| chr7H | 628259528 | 628263040 | + | HORVU7Hr1G109560 | K21813 |
| chr7H | 628360508 | 628360580 | + | ENSRNA049440972  |        |
| chr7H | 628363979 | 628364051 | + | ENSRNA049440961  |        |
| chr7H | 628364391 | 628364463 | - | ENSRNA049441783  |        |
| chr7H | 628364665 | 628369128 | - | HORVU7Hr1G109580 |        |
| chr7H | 628369567 | 628374492 | - | HORVU7Hr1G109590 |        |
| chr7H | 628801065 | 628813596 | - | HORVU7Hr1G109770 |        |
| chr7H | 629619602 | 629624174 | - | HORVU7Hr1G110260 |        |
| chr7H | 629640247 | 629641500 | + | HORVU7Hr1G110280 | K11252 |
| chr7H | 629640922 | 629641332 | - | HORVU7Hr1G110290 | K11252 |
| chr7H | 629652507 | 629653312 | - | HORVU7Hr1G110310 | K11252 |
| chr7H | 629662818 | 629664093 | + | HORVU7Hr1G110320 | K11252 |
| chr7H | 629663547 | 629664043 | - | HORVU7Hr1G110330 | K11252 |
| chr7H | 629950371 | 629954881 | - | HORVU7Hr1G110440 |        |
| chr7H | 632201936 | 632202007 | + | ENSRNA049440927  |        |
| chr7H | 632202536 | 632208108 | - | HORVU7Hr1G110990 |        |
| chr7H | 636161492 | 636165359 | - | HORVU7Hr1G112920 |        |
| chr7H | 636161495 | 636163096 | + | HORVU7Hr1G112930 | K02377 |

|       |           |           |   |                  |        |
|-------|-----------|-----------|---|------------------|--------|
| chr7H | 636164621 | 636165448 | + | HORVU7Hr1G112940 |        |
| chr4H | 17438157  | 17446158  | + | HORVU4Hr1G007020 |        |
| chr4H | 23461411  | 23468904  | + | HORVU4Hr1G008530 |        |
| chr4H | 26338990  | 26341159  | - | HORVU4Hr1G009270 |        |
| chr4H | 26664812  | 26669252  | - | HORVU4Hr1G009360 | K18328 |
| chr4H | 28425448  | 28427524  | + | HORVU4Hr1G009760 |        |
| chr4H | 28932392  | 28936565  | + | HORVU4Hr1G009870 |        |
| chr4H | 28937626  | 28939374  | - | HORVU4Hr1G009880 |        |
| chr4H | 29194024  | 29198432  | - | HORVU4Hr1G009970 |        |
| chr4H | 29424896  | 29431208  | - | HORVU4Hr1G009990 |        |
| chr4H | 30747069  | 30748133  | + | HORVU4Hr1G010290 |        |
| chr4H | 30750565  | 30755045  | + | HORVU4Hr1G010300 |        |
| chr4H | 35007639  | 35013513  | + | HORVU4Hr1G011370 |        |
| chr4H | 35087022  | 35091459  | + | HORVU4Hr1G011420 |        |
| chr4H | 41102174  | 41113394  | + | HORVU4Hr1G012400 |        |
| chr4H | 43582368  | 43584005  | + | HORVU4Hr1G012850 | K04505 |
| chr4H | 43592359  | 43592818  | - | HORVU4Hr1G012870 | K02144 |
| chr4H | 44238559  | 44247903  | + | HORVU4Hr1G013030 |        |
| chr4H | 46767208  | 46774429  | + | HORVU4Hr1G013420 |        |
| chr4H | 65649263  | 65650382  | + | HORVU4Hr1G016210 |        |
| chr4H | 66861420  | 66864859  | - | HORVU4Hr1G016350 |        |
| chr4H | 68845951  | 68847192  | - | HORVU4Hr1G016600 |        |
| chr4H | 69379505  | 69383521  | - | HORVU4Hr1G016640 | K14007 |
| chr4H | 72684241  | 72689839  | + | HORVU4Hr1G017030 | K14190 |
| chr4H | 81552157  | 81566437  | + | HORVU4Hr1G018150 |        |
| chr4H | 85417562  | 85418639  | - | HORVU4Hr1G018650 |        |
| chr4H | 92750153  | 92757367  | + | HORVU4Hr1G019360 | K10644 |
| chr4H | 92763298  | 92766044  | - | HORVU4Hr1G019380 |        |
| chr4H | 93624533  | 93627841  | + | HORVU4Hr1G019460 |        |
| chr4H | 93635488  | 93644440  | + | HORVU4Hr1G019470 |        |
| chr4H | 94469497  | 94474320  | - | HORVU4Hr1G019530 |        |
| chr4H | 94599322  | 94602229  | + | HORVU4Hr1G019560 | K13140 |
| chr4H | 94602390  | 94605682  | + | HORVU4Hr1G019570 | K01623 |
| chr4H | 95579515  | 95581578  | - | HORVU4Hr1G019850 | K21844 |
| chr4H | 96358327  | 96366275  | + | HORVU4Hr1G019910 |        |
| chr4H | 96369114  | 96371272  | - | HORVU4Hr1G019930 | K13946 |
| chr4H | 96770575  | 96773221  | + | HORVU4Hr1G019980 | K02925 |
| chr4H | 96774405  | 96780109  | + | HORVU4Hr1G019990 |        |
| chr4H | 96780385  | 96784552  | + | HORVU4Hr1G020000 |        |
| chr4H | 97456114  | 97457293  | - | HORVU4Hr1G020030 |        |
| chr4H | 98873364  | 98878574  | + | HORVU4Hr1G020160 |        |
| chr4H | 107198462 | 107206973 | + | HORVU4Hr1G021140 |        |
| chr4H | 123782482 | 123797229 | + | HORVU4Hr1G023100 | K11717 |

|       |           |           |   |                  |        |
|-------|-----------|-----------|---|------------------|--------|
| chr4H | 145111427 | 145111564 | + | HORVU4Hr1G025060 |        |
| chr4H | 145113474 | 145117222 | + | HORVU4Hr1G025070 | K13430 |
| chr4H | 145113474 | 145123037 | - | HORVU4Hr1G025080 | K13430 |
| chr4H | 165585311 | 165588617 | - | HORVU4Hr1G027180 |        |
| chr4H | 348274482 | 348277389 | + | HORVU4Hr1G043660 | K02884 |
| chr4H | 348342112 | 348344688 | - | HORVU4Hr1G043680 | K24917 |
| chr4H | 350262817 | 350266616 | + | HORVU4Hr1G043910 | K09580 |
| chr4H | 351970606 | 351985432 | + | HORVU4Hr1G043970 | K00876 |
| chr4H | 387764460 | 387765655 | - | HORVU4Hr1G048160 |        |
| chr4H | 402185706 | 402208358 | + | HORVU4Hr1G049590 |        |
| chr4H | 413874464 | 413887775 | - | HORVU4Hr1G050710 |        |
| chr4H | 437127502 | 437137117 | - | HORVU4Hr1G052570 |        |
| chr4H | 437167861 | 437169180 | - | HORVU4Hr1G052610 | K22074 |
| chr4H | 438608884 | 438609405 | + | HORVU4Hr1G052770 |        |
| chr4H | 438612259 | 438619827 | + | HORVU4Hr1G052790 |        |
| chr4H | 438669562 | 438673914 | - | HORVU4Hr1G052810 | K01756 |
| chr4H | 438675397 | 438675606 | + | HORVU4Hr1G052820 |        |
| chr4H | 476598333 | 476598935 | + | HORVU4Hr1G056750 |        |
| chr4H | 476599485 | 476600818 | + | HORVU4Hr1G056760 |        |
| chr4H | 480892997 | 480895942 | - | HORVU4Hr1G057200 | K20536 |
| chr4H | 482105453 | 482113450 | - | HORVU4Hr1G057360 |        |
| chr4H | 504382270 | 504387591 | - | HORVU4Hr1G060190 |        |
| chr4H | 574701706 | 574708389 | - | HORVU4Hr1G070220 |        |
| chr4H | 580092085 | 580097073 | + | HORVU4Hr1G071250 | K17469 |
| chr4H | 580160224 | 580171376 | - | HORVU4Hr1G071270 | K14521 |
| chr4H | 583649413 | 583655355 | + | HORVU4Hr1G072150 | K01904 |
| chr4H | 586897060 | 586903117 | + | HORVU4Hr1G072920 |        |
| chr4H | 586899433 | 586902977 | - | HORVU4Hr1G072930 |        |
| chr4H | 587500662 | 587501437 | + | HORVU4Hr1G072960 | K15397 |
| chr4H | 587511230 | 587512083 | - | HORVU4Hr1G072970 |        |
| chr4H | 595099439 | 595100488 | + | HORVU4Hr1G074690 |        |
| chr4H | 595103615 | 595109265 | - | HORVU4Hr1G074700 | K04382 |
| chr4H | 595523761 | 595528850 | + | HORVU4Hr1G074790 |        |
| chr4H | 596060773 | 596066666 | - | HORVU4Hr1G074960 |        |
| chr4H | 596060795 | 596064280 | + | HORVU4Hr1G074970 |        |
| chr4H | 596299561 | 596307590 | + | HORVU4Hr1G075040 |        |
| chr4H | 597090974 | 597096520 | + | HORVU4Hr1G075200 | K15378 |
| chr4H | 599032193 | 599035023 | - | HORVU4Hr1G075710 | K02930 |
| chr4H | 599159830 | 599166651 | - | HORVU4Hr1G075720 | K20843 |
| chr4H | 601100279 | 601108113 | + | HORVU4Hr1G076570 | K00454 |
| chr4H | 605486888 | 605488575 | + | HORVU4Hr1G077790 | K13065 |
| chr4H | 605492266 | 605497222 | + | HORVU4Hr1G077800 |        |
| chr4H | 606225436 | 606234907 | + | HORVU4Hr1G078050 |        |

|       |           |           |   |                  |        |
|-------|-----------|-----------|---|------------------|--------|
| chr4H | 609867536 | 609872982 | - | HORVU4Hr1G078920 |        |
| chr4H | 611031626 | 611040666 | + | HORVU4Hr1G079100 |        |
| chr4H | 611470870 | 611473982 | + | HORVU4Hr1G079170 |        |
| chr4H | 611470881 | 611475710 | - | HORVU4Hr1G079180 |        |
| chr4H | 611627598 | 611633156 | - | HORVU4Hr1G079250 |        |
| chr4H | 611679942 | 611682960 | - | HORVU4Hr1G079260 |        |
| chr4H | 611690785 | 611692599 | - | HORVU4Hr1G079270 |        |
| chr4H | 611794086 | 611804953 | - | HORVU4Hr1G079300 |        |
| chr4H | 611811711 | 611814381 | + | HORVU4Hr1G079310 |        |
| chr4H | 611815171 | 611818868 | + | HORVU4Hr1G079330 | K13071 |
| chr4H | 612079781 | 612082649 | + | HORVU4Hr1G079400 |        |
| chr4H | 612083626 | 612108450 | + | HORVU4Hr1G079420 |        |
| chr4H | 613198175 | 613209115 | + | HORVU4Hr1G079710 |        |
| chr4H | 613205845 | 613208339 | - | HORVU4Hr1G079740 |        |
| chr4H | 613751731 | 613756976 | + | HORVU4Hr1G079940 | K02068 |
| chr4H | 613759966 | 613781275 | - | HORVU4Hr1G079950 |        |
| chr4H | 613789679 | 613791820 | + | HORVU4Hr1G079990 |        |
| chr4H | 613793336 | 613797119 | - | HORVU4Hr1G080000 | K01945 |
| chr4H | 613805852 | 613807701 | - | HORVU4Hr1G080030 |        |
| chr4H | 613808586 | 613814590 | - | HORVU4Hr1G080050 |        |
| chr4H | 615383587 | 615388493 | + | HORVU4Hr1G080420 |        |
| chr4H | 615697912 | 615705266 | - | HORVU4Hr1G080450 |        |
| chr4H | 616240827 | 616250618 | + | HORVU4Hr1G080560 |        |
| chr4H | 616241933 | 616249757 | - | HORVU4Hr1G080570 | K01102 |
| chr4H | 617388840 | 617391479 | + | HORVU4Hr1G080780 | K08242 |
| chr4H | 617393608 | 617393889 | + | HORVU4Hr1G080790 |        |
| chr4H | 617794026 | 617809180 | + | HORVU4Hr1G080940 |        |
| chr4H | 618414859 | 618416109 | + | HORVU4Hr1G081100 | K00799 |
| chr4H | 618692052 | 618693972 | - | HORVU4Hr1G081230 | K11279 |
| chr4H | 618869082 | 618875298 | - | HORVU4Hr1G081310 |        |
| chr4H | 622330494 | 622332849 | - | HORVU4Hr1G082470 | K23618 |
| chr4H | 624578081 | 624580802 | + | HORVU4Hr1G083200 |        |
| chr4H | 624583900 | 624589934 | - | HORVU4Hr1G083210 |        |
| chr4H | 625193355 | 625194764 | + | HORVU4Hr1G083400 |        |
| chr4H | 626997423 | 627002978 | + | HORVU4Hr1G083950 | K16296 |
| chr4H | 627011903 | 627020858 | - | HORVU4Hr1G083970 |        |
| chr4H | 629483972 | 629487192 | + | HORVU4Hr1G084600 |        |
| chr4H | 629524229 | 629528665 | + | HORVU4Hr1G084670 |        |
| chr4H | 629524254 | 629534446 | - | HORVU4Hr1G084680 |        |
| chr4H | 629589221 | 629593649 | - | HORVU4Hr1G084710 |        |
| chr4H | 629644007 | 629644737 | + | HORVU4Hr1G084750 |        |
| chr4H | 629644892 | 629647909 | - | HORVU4Hr1G084760 | K10577 |
| chr4H | 630855665 | 630860598 | + | HORVU4Hr1G085050 | K22390 |

|       |           |           |   |                  |        |
|-------|-----------|-----------|---|------------------|--------|
| chr4H | 630862306 | 630862811 | + | HORVU4Hr1G085060 |        |
| chr4H | 630899295 | 630906064 | + | HORVU4Hr1G085100 |        |
| chr4H | 631020732 | 631022177 | - | HORVU4Hr1G085150 |        |
| chr4H | 631305594 | 631307831 | - | HORVU4Hr1G085250 | K09873 |
| chr4H | 631469114 | 631473133 | - | HORVU4Hr1G085280 |        |
| chr4H | 631473499 | 631479506 | - | HORVU4Hr1G085290 |        |
| chr4H | 631485665 | 631488175 | + | HORVU4Hr1G085300 |        |
| chr4H | 631485732 | 631490073 | - | HORVU4Hr1G085310 |        |
| chr4H | 632308238 | 632310222 | + | HORVU4Hr1G085730 |        |
| chr4H | 632310354 | 632313768 | - | HORVU4Hr1G085740 | K19323 |
| chr4H | 632316301 | 632325141 | - | HORVU4Hr1G085750 |        |
| chr4H | 633160208 | 633161206 | + | HORVU4Hr1G085990 |        |
| chr4H | 633169005 | 633174352 | + | HORVU4Hr1G086000 |        |
| chr4H | 633178339 | 633181842 | + | HORVU4Hr1G086010 | K03036 |
| chr4H | 633181302 | 633184491 | - | HORVU4Hr1G086020 |        |
| chr4H | 633598304 | 633602296 | + | HORVU4Hr1G086300 | K01193 |
| chr4H | 633831715 | 633835334 | + | HORVU4Hr1G086320 | K01074 |
| chr4H | 633837715 | 633843075 | + | HORVU4Hr1G086330 | K03217 |
| chr4H | 633848205 | 633851299 | + | HORVU4Hr1G086340 |        |
| chr4H | 634679688 | 634693548 | + | HORVU4Hr1G086600 |        |
| chr4H | 634681305 | 634684145 | - | HORVU4Hr1G086610 | K10523 |
| chr4H | 634691102 | 634691644 | - | HORVU4Hr1G086620 |        |
| chr4H | 634768494 | 634773415 | + | HORVU4Hr1G086640 |        |
| chr4H | 634776721 | 634782324 | + | HORVU4Hr1G086650 |        |
| chr4H | 634782750 | 634783854 | - | HORVU4Hr1G086660 |        |
| chr4H | 634903821 | 634904932 | + | HORVU4Hr1G086700 |        |
| chr4H | 634958591 | 634967450 | - | HORVU4Hr1G086770 |        |
| chr4H | 635064480 | 635066507 | + | HORVU4Hr1G086790 | K11096 |
| chr4H | 636203381 | 636206530 | - | HORVU4Hr1G087110 | K13356 |
| chr4H | 636210530 | 636214016 | - | HORVU4Hr1G087120 | K04506 |
| chr4H | 636346638 | 636348300 | + | HORVU4Hr1G087220 |        |
| chr4H | 636352038 | 636357622 | - | HORVU4Hr1G087230 | K14641 |
| chr4H | 636577557 | 636581046 | - | HORVU4Hr1G087350 | K08994 |
| chr4H | 636582909 | 636595402 | - | HORVU4Hr1G087360 |        |
| chr4H | 637460167 | 637467469 | - | HORVU4Hr1G087580 |        |
| chr4H | 637477795 | 637503164 | + | HORVU4Hr1G087590 |        |
| chr4H | 641252933 | 641254865 | - | HORVU4Hr1G088890 |        |
| chr4H | 641255864 | 641265633 | - | HORVU4Hr1G088900 | K01872 |
| chr4H | 641271439 | 641285258 | + | HORVU4Hr1G088910 |        |
| chr4H | 641293324 | 641295356 | - | HORVU4Hr1G088930 |        |
| chr4H | 641590588 | 641595822 | + | HORVU4Hr1G089060 | K00103 |
| chr4H | 641600081 | 641606961 | - | HORVU4Hr1G089080 |        |
| chr4H | 641608344 | 641613015 | + | HORVU4Hr1G089090 | K04043 |

|       |           |           |   |                  |        |
|-------|-----------|-----------|---|------------------|--------|
| chr4H | 642064582 | 642066848 | + | HORVU4Hr1G089270 |        |
| chr4H | 642064583 | 642071249 | - | HORVU4Hr1G089280 |        |
| chr4H | 642261253 | 642262994 | + | HORVU4Hr1G089410 |        |
| chr4H | 643004384 | 643006737 | - | HORVU4Hr1G089560 |        |
| chr4H | 643012334 | 643013799 | + | HORVU4Hr1G089580 | K22312 |
| chr4H | 643053070 | 643099588 | - | HORVU4Hr1G089590 |        |
| chr4H | 643065106 | 643069109 | - | HORVU4Hr1G089610 | K13508 |
| chr4H | 644829984 | 644832691 | - | HORVU4Hr1G090260 |        |
| chr4H | 644831527 | 644837545 | + | HORVU4Hr1G090270 |        |
| chr4H | 644838102 | 644840787 | + | HORVU4Hr1G090280 | K03115 |
| chr4H | 644976930 | 644980105 | - | HORVU4Hr1G090330 |        |
| chr4H | 644985085 | 644988633 | + | HORVU4Hr1G090350 | K18065 |
| chr4H | 644989198 | 644992163 | - | HORVU4Hr1G090360 | K20889 |
| chr6H | 11919134  | 11925471  | + | HORVU6Hr1G005350 |        |
| chr6H | 11922767  | 12061749  | - | HORVU6Hr1G005360 |        |
| chr6H | 11928429  | 11944450  | - | HORVU6Hr1G005370 | K12821 |
| chr6H | 43926918  | 43928295  | + | HORVU6Hr1G017960 |        |
| chr6H | 43928354  | 43928550  | - | ENSRNA049485813  |        |
| chr6H | 43928474  | 43928672  | + | HORVU6Hr1G017970 |        |
| chr6H | 143256473 | 143261264 | + | HORVU6Hr1G032570 | K03064 |
| chr6H | 355516468 | 355521532 | + | HORVU6Hr1G055820 |        |
| chr6H | 364354426 | 364362218 | + | HORVU6Hr1G056490 |        |
| chr6H | 405010351 | 405014188 | - | HORVU6Hr1G060760 |        |
| chr6H | 413265108 | 413265651 | - | HORVU6Hr1G061740 |        |
| chr6H | 413274272 | 413281744 | - | HORVU6Hr1G061750 |        |
| chr6H | 424348311 | 424353175 | + | HORVU6Hr1G063100 | K10268 |
| chr6H | 424353691 | 424356849 | + | HORVU6Hr1G063120 |        |
| chr6H | 442928653 | 442931507 | - | HORVU6Hr1G064820 |        |
| chr6H | 489027667 | 489029492 | + | HORVU6Hr1G070350 |        |
| chr6H | 500725043 | 500735879 | + | HORVU6Hr1G072070 |        |
| chr6H | 500730262 | 500730788 | - | HORVU6Hr1G072080 |        |
| chr6H | 500732208 | 500735891 | - | HORVU6Hr1G072100 | K15445 |
| chr6H | 502525838 | 502530698 | + | HORVU6Hr1G072300 |        |
| chr6H | 502529735 | 502530403 | - | HORVU6Hr1G072310 |        |
| chr6H | 503268669 | 503269507 | - | HORVU6Hr1G072390 |        |
| chr6H | 503270970 | 503276564 | - | HORVU6Hr1G072420 |        |
| chr6H | 509623775 | 509629249 | + | HORVU6Hr1G073590 |        |
| chr6H | 513108626 | 513115648 | + | HORVU6Hr1G074210 |        |
| chr6H | 513108807 | 513120207 | - | HORVU6Hr1G074220 |        |
| chr6H | 530729201 | 530732139 | + | HORVU6Hr1G077500 | K18810 |
| chr6H | 538081936 | 538088851 | + | HORVU6Hr1G079560 |        |
| chr6H | 538093475 | 538094848 | + | HORVU6Hr1G079590 |        |
| chr6H | 559749653 | 559758664 | - | HORVU6Hr1G085710 |        |

|       |           |           |   |                  |        |
|-------|-----------|-----------|---|------------------|--------|
| chr6H | 560155444 | 560160792 | + | HORVU6Hr1G085870 | K17086 |
| chr6H | 560158863 | 560183696 | - | HORVU6Hr1G085880 |        |
| chr6H | 575766021 | 575769296 | + | HORVU6Hr1G091540 |        |
| chr6H | 575769878 | 575774590 | - | HORVU6Hr1G091550 | K06269 |
| chr1H | 23198930  | 23202488  | - | HORVU1Hr1G010220 |        |
| chr1H | 67288427  | 67289119  | - | HORVU1Hr1G018370 |        |
| chr1H | 67297058  | 67303566  | - | HORVU1Hr1G018380 | K07466 |
| chr1H | 80825648  | 80825788  | - | HORVU1Hr1G020460 |        |
| chr1H | 80827355  | 80832088  | + | HORVU1Hr1G020470 | K12449 |
| chr1H | 81825284  | 81832874  | - | HORVU1Hr1G020620 | K11374 |
| chr1H | 82141298  | 82143805  | - | HORVU1Hr1G020690 | K00430 |
| chr1H | 84326638  | 84338957  | + | HORVU1Hr1G021120 |        |
| chr1H | 84343681  | 84347935  | + | HORVU1Hr1G021130 | K01893 |
| chr1H | 84399076  | 84400190  | + | HORVU1Hr1G021150 | K00799 |
| chr1H | 84405715  | 84407984  | + | HORVU1Hr1G021160 | K00799 |
| chr1H | 84414501  | 84415817  | + | HORVU1Hr1G021170 | K00799 |
| chr1H | 284571341 | 284583896 | + | HORVU1Hr1G040250 |        |
| chr1H | 284574939 | 284575781 | - | HORVU1Hr1G040260 |        |
| chr1H | 284579816 | 284580490 | - | HORVU1Hr1G040300 |        |
| chr1H | 284580560 | 284580919 | - | HORVU1Hr1G040310 |        |
| chr1H | 321614760 | 321618227 | + | HORVU1Hr1G044040 |        |
| chr1H | 321616679 | 321617299 | + | HORVU1Hr1G044050 |        |
| chr1H | 322787504 | 322790215 | + | HORVU1Hr1G044380 |        |
| chr1H | 322796701 | 322797001 | + | HORVU1Hr1G044400 |        |
| chr1H | 323431234 | 323433765 | - | HORVU1Hr1G044530 |        |
| chr1H | 328624334 | 328628558 | - | HORVU1Hr1G045220 | K20858 |
| chr1H | 341763204 | 341772442 | - | HORVU1Hr1G046630 | K01873 |
| chr1H | 342779014 | 342781162 | - | HORVU1Hr1G046710 |        |
| chr1H | 344583893 | 344588775 | - | HORVU1Hr1G046870 | K11093 |
| chr1H | 348548115 | 348552175 | + | HORVU1Hr1G047220 | K09755 |
| chr1H | 361583031 | 361592163 | + | HORVU1Hr1G048720 |        |
| chr1H | 362142404 | 362144861 | - | HORVU1Hr1G048830 | K03327 |
| chr1H | 362147439 | 362152283 | - | HORVU1Hr1G048840 |        |
| chr1H | 365007068 | 365008396 | - | HORVU1Hr1G049260 |        |
| chr1H | 365007166 | 365010002 | + | HORVU1Hr1G049270 | K00799 |
| chr1H | 366507315 | 366510797 | - | HORVU1Hr1G049480 |        |
| chr1H | 367819284 | 367820502 | - | HORVU1Hr1G049650 |        |
| chr1H | 367825851 | 367827802 | - | HORVU1Hr1G049660 |        |
| chr1H | 368818215 | 368824801 | + | HORVU1Hr1G049810 |        |
| chr1H | 368818336 | 368824678 | - | HORVU1Hr1G049820 |        |
| chr1H | 375899671 | 375903804 | + | HORVU1Hr1G050640 |        |
| chr1H | 376369608 | 376374160 | + | HORVU1Hr1G050730 |        |
| chr1H | 376375852 | 376380580 | + | HORVU1Hr1G050740 |        |

|       |           |           |   |                  |        |
|-------|-----------|-----------|---|------------------|--------|
| chr1H | 376375968 | 376376787 | - | HORVU1Hr1G050750 |        |
| chr1H | 376378591 | 376383176 | - | HORVU1Hr1G050760 | K00913 |
| chr1H | 381313035 | 381328695 | + | HORVU1Hr1G051460 |        |
| chr1H | 381322517 | 381328711 | - | HORVU1Hr1G051470 |        |
| chr1H | 382299770 | 382300802 | - | HORVU1Hr1G051560 |        |
| chr1H | 382301293 | 382317173 | - | HORVU1Hr1G051570 | K17973 |
| chr1H | 383460565 | 383462205 | - | HORVU1Hr1G051700 |        |
| chr1H | 384608005 | 384616626 | + | HORVU1Hr1G051840 |        |
| chr1H | 388627045 | 388643679 | + | HORVU1Hr1G052430 |        |
| chr1H | 391997066 | 392011255 | + | HORVU1Hr1G053020 | K23288 |
| chr1H | 392012662 | 392013871 | - | HORVU1Hr1G053050 |        |
| chr1H | 393441626 | 393460600 | - | HORVU1Hr1G053190 |        |
| chr1H | 393963164 | 393967064 | - | HORVU1Hr1G053270 |        |
| chr1H | 393971002 | 393974978 | - | HORVU1Hr1G053280 |        |
| chr1H | 395873135 | 395875994 | + | HORVU1Hr1G053510 |        |
| chr1H | 397164492 | 397171992 | + | HORVU1Hr1G053840 |        |
| chr1H | 397858671 | 397861712 | + | HORVU1Hr1G053900 |        |
| chr1H | 397861757 | 397861827 | - | ENS RNA049447675 |        |
| chr1H | 398652421 | 398808254 | - | HORVU1Hr1G053990 |        |
| chr1H | 398749497 | 398753454 | + | HORVU1Hr1G054020 |        |
| chr1H | 399234596 | 399237714 | - | HORVU1Hr1G054060 |        |
| chr1H | 401040803 | 401045363 | - | HORVU1Hr1G054240 |        |
| chr1H | 401397085 | 401413879 | - | HORVU1Hr1G054260 |        |
| chr1H | 404207619 | 404209620 | - | HORVU1Hr1G054930 | K19042 |
| chr1H | 404914155 | 404917858 | - | HORVU1Hr1G055210 | K22684 |
| chr1H | 405296725 | 405301886 | + | HORVU1Hr1G055300 | K06268 |
| chr1H | 405305563 | 405312023 | - | HORVU1Hr1G055320 |        |
| chr1H | 405305563 | 405312023 | + | HORVU1Hr1G055330 |        |
| chr1H | 406525155 | 406531073 | + | HORVU1Hr1G055510 |        |
| chr1H | 406533021 | 406535450 | + | HORVU1Hr1G055520 |        |
| chr1H | 406621879 | 406625635 | + | HORVU1Hr1G055530 |        |
| chr1H | 406997955 | 407009508 | + | HORVU1Hr1G055580 |        |
| chr1H | 407342662 | 407538866 | - | HORVU1Hr1G055600 |        |
| chr1H | 407348346 | 407349410 | + | HORVU1Hr1G055630 |        |
| chr1H | 409504534 | 409511833 | + | HORVU1Hr1G055890 |        |
| chr1H | 419378870 | 419385796 | - | HORVU1Hr1G057460 |        |
| chr1H | 419390597 | 419391353 | + | HORVU1Hr1G057480 |        |
| chr1H | 419781402 | 419786824 | - | HORVU1Hr1G057520 |        |
| chr1H | 420229299 | 420233386 | - | HORVU1Hr1G057570 | K03955 |
| chr1H | 420569969 | 420574287 | + | HORVU1Hr1G057640 |        |
| chr1H | 420569993 | 420574422 | - | HORVU1Hr1G057650 |        |
| chr1H | 420574729 | 420581630 | - | HORVU1Hr1G057660 | K14411 |
| chr1H | 423112771 | 423120255 | + | HORVU1Hr1G058000 |        |

|       |           |           |   |                  |        |
|-------|-----------|-----------|---|------------------|--------|
| chr1H | 423122710 | 423123436 | - | HORVU1Hr1G058010 |        |
| chr1H | 423126092 | 423131749 | + | HORVU1Hr1G058020 | K13207 |
| chr1H | 424467284 | 424470411 | + | HORVU1Hr1G058170 |        |
| chr1H | 424823399 | 424830206 | - | HORVU1Hr1G058190 |        |
| chr1H | 425801911 | 425807445 | - | HORVU1Hr1G058330 |        |
| chr1H | 425921313 | 425925269 | - | HORVU1Hr1G058340 |        |
| chr1H | 428065978 | 428068607 | + | HORVU1Hr1G058750 |        |
| chr1H | 428079112 | 428085155 | - | HORVU1Hr1G058770 | K18482 |
| chr1H | 458912977 | 458916662 | - | HORVU1Hr1G064160 |        |
| chr1H | 458915520 | 458915711 | - | HORVU1Hr1G064180 |        |
| chr1H | 461398914 | 461403858 | + | HORVU1Hr1G064440 | K08472 |
| chr1H | 464420461 | 464423230 | - | HORVU1Hr1G064950 |        |
| chr1H | 465323892 | 465328316 | - | HORVU1Hr1G065000 | K22733 |
| chr1H | 469073016 | 469075988 | + | HORVU1Hr1G065820 |        |
| chr1H | 471472632 | 471476335 | - | HORVU1Hr1G066240 | K03809 |
| chr1H | 472946083 | 472947141 | + | HORVU1Hr1G066500 | K02116 |
| chr1H | 472948820 | 472951168 | - | HORVU1Hr1G066510 |        |
| chr1H | 507686919 | 507690316 | - | HORVU1Hr1G074350 | K10355 |
| chr1H | 508567384 | 508569768 | - | HORVU1Hr1G074600 |        |
| chr1H | 508779949 | 508787438 | - | HORVU1Hr1G074660 |        |
| chr1H | 508789844 | 508794190 | - | HORVU1Hr1G074670 |        |
| chr1H | 509508851 | 509513968 | + | HORVU1Hr1G074940 |        |
| chr1H | 509515883 | 509527854 | - | HORVU1Hr1G074960 |        |
| chr1H | 509763075 | 509768157 | - | HORVU1Hr1G075110 |        |
| chr1H | 509776082 | 509776153 | + | ENSRNA049448274  |        |
| chr1H | 514008170 | 514016820 | + | HORVU1Hr1G076380 |        |
| chr1H | 514922336 | 514929397 | + | HORVU1Hr1G076610 |        |
| chr1H | 514925678 | 514933568 | - | HORVU1Hr1G076620 |        |
| chr1H | 518159277 | 518160365 | - | HORVU1Hr1G077680 | K14516 |
| chr1H | 520109884 | 520111240 | + | HORVU1Hr1G078380 | K08912 |
| chr1H | 520118880 | 520122133 | + | HORVU1Hr1G078390 | K09775 |
| chr1H | 521271209 | 521271499 | - | HORVU1Hr1G078870 |        |
| chr1H | 521283934 | 521292837 | + | HORVU1Hr1G078880 |        |
| chr1H | 521293226 | 521300129 | - | HORVU1Hr1G078890 |        |
| chr1H | 522260222 | 522266530 | - | HORVU1Hr1G079050 | K12393 |
| chr1H | 522260258 | 522261172 | + | HORVU1Hr1G079060 |        |
| chr1H | 522473999 | 522486419 | - | HORVU1Hr1G079170 |        |
| chr1H | 522486714 | 522492991 | - | HORVU1Hr1G079200 |        |
| chr1H | 522495889 | 522497697 | + | HORVU1Hr1G079210 |        |
| chr1H | 523730064 | 523732132 | - | HORVU1Hr1G079730 |        |
| chr1H | 524503284 | 524509889 | + | HORVU1Hr1G080070 | K01952 |
| chr1H | 530744050 | 530752626 | + | HORVU1Hr1G082900 | K18693 |
| chr1H | 531647372 | 531648679 | + | HORVU1Hr1G083340 |        |

|       |           |           |   |                  |        |
|-------|-----------|-----------|---|------------------|--------|
| chr1H | 540571001 | 540572989 | - | HORVU1Hr1G087870 |        |
| chr1H | 540581949 | 540584326 | - | HORVU1Hr1G087880 |        |
| chr1H | 540584485 | 540593837 | - | HORVU1Hr1G087900 |        |
| chr1H | 541346878 | 541351320 | + | HORVU1Hr1G088270 |        |
| chr1H | 541902822 | 541907742 | - | HORVU1Hr1G088510 |        |
| chrUn | 7484963   | 7494019   | - | HORVU0Hr1G001400 | K24763 |
| chrUn | 27394947  | 27395845  | - | HORVU0Hr1G004750 |        |
| chrUn | 30807952  | 30809673  | + | HORVU0Hr1G005640 |        |
| chrUn | 54922165  | 54922650  | + | HORVU0Hr1G009370 |        |
| chrUn | 54927981  | 54933076  | - | HORVU0Hr1G009380 |        |
| chrUn | 64097381  | 64101477  | - | HORVU0Hr1G011310 |        |
| chrUn | 64109105  | 64109510  | + | HORVU0Hr1G011320 |        |
| chrUn | 64109877  | 64110408  | + | HORVU0Hr1G011330 |        |
| chrUn | 104228480 | 104230005 | + | HORVU0Hr1G019800 |        |
| chrUn | 110178333 | 110179149 | + | HORVU0Hr1G021040 |        |
| chrUn | 110179208 | 110183094 | - | HORVU0Hr1G021050 |        |
| chrUn | 110183556 | 110187206 | - | HORVU0Hr1G021060 |        |
| chrUn | 247086982 | 247091166 | - | HORVU0Hr1G038600 |        |
| chrUn | 247095871 | 247103683 | - | HORVU0Hr1G038620 | K10885 |
| chrUn | 247095871 | 247099519 | + | HORVU0Hr1G038610 |        |
| chrUn | 247105278 | 247106340 | - | HORVU0Hr1G038630 |        |
| chrUn | 248023923 | 248025701 | + | HORVU0Hr1G039050 |        |
| chrUn | 248032532 | 248035876 | + | HORVU0Hr1G039070 |        |
| chrUn | 248570417 | 248597651 | - | HORVU0Hr1G039330 |        |
| chrUn | 248576468 | 248576737 | - | HORVU0Hr1G039350 |        |

**Table S13.** All accessions used in this study.

| Populations | NCBI ID      | Accession ID | Sequencing type  |
|-------------|--------------|--------------|------------------|
| Wb-NE       | Hsp          | WGS-Hsp1     | resequencing     |
| Wb-NE       | SAMN08005653 | WGS-Hsp2     | resequencing     |
| Wb-NE       | SAMN08005654 | WGS-Hsp3     | resequencing     |
| Wb-NE       | SAMN08005655 | WGS-Htr      | resequencing     |
| Wb-NE       | SAMN20065695 | HS7          | RNA-resequencing |
| Wb-NE       | SAMN20065696 | HS26         | RNA-resequencing |
| Wb-NE       | SAMN20065697 | HS38         | RNA-resequencing |
| Wb-NE       | SAMN20065698 | HS56         | RNA-resequencing |
| Wb-NE       | SAMN20065699 | HS18         | RNA-resequencing |
| Wb-NE       | SAMN20065700 | HS23         | RNA-resequencing |
| Wb-NE       | SAMN20065701 | HS30         | RNA-resequencing |

|       |              |          |                  |
|-------|--------------|----------|------------------|
| Wb-NE | SAMN20065702 | HS31     | RNA-resequencing |
| Wb-NE | SAMN20065703 | HS39     | RNA-resequencing |
| Cb-NE | SAMN08005706 | WGS-Ld1  | resequencing     |
| Cb-NE | SAMN08005707 | WGS-Ld2  | resequencing     |
| Cb-NE | SAMN08005659 | WGS-Cu8  | resequencing     |
| Cb-NE | SAMN08005660 | WGS-Cu9  | resequencing     |
| Cb-NE | SAMN08005662 | WGS-Cu11 | resequencing     |
| Cb-NE | SAMN08005670 | WGS-Cu19 | resequencing     |
| Wb-T  | SAMN08005724 | WGS-Tw10 | resequencing     |
| Wb-T  | SAMN08005722 | WGS-Tw8  | resequencing     |
| Wb-T  | SAMN08005723 | WGS-Tw9  | resequencing     |
| Wb-T  | SAMN08005715 | WGS-Tw1  | resequencing     |
| Wb-T  | SAMN08005716 | WGS-Tw2  | resequencing     |
| Wb-T  | SAMN08005717 | WGS-Tw3  | resequencing     |
| Wb-T  | SAMN08005719 | WGS-Tw5  | resequencing     |
| Wb-T  | SAMN08005720 | WGS-Tw6  | resequencing     |
| Wb-T  | SAMN08005718 | WGS-Tw4  | resequencing     |
| Wb-T  | SAMN08005721 | WGS-Tw7  | resequencing     |
| Wb-T  | SAMN20065685 | HS100    | RNA-resequencing |
| Wb-T  | SAMN20065686 | HS109    | RNA-resequencing |
| Wb-T  | SAMN20065687 | HS105    | RNA-resequencing |
| Wb-T  | SAMN20065688 | HS106    | RNA-resequencing |
| Wb-T  | SAMN20065689 | HS107    | RNA-resequencing |
| Wb-T  | SAMN20065690 | HS108    | RNA-resequencing |
| Wb-T  | SAMN20065691 | HS101    | RNA-resequencing |
| Wb-T  | SAMN20065692 | HS102    | RNA-resequencing |
| Wb-T  | SAMN20065693 | HS103    | RNA-resequencing |
| Wb-T  | SAMN20065694 | HS104    | RNA-resequencing |
| Cb-C  | SAMN08005668 | WGS-Cu17 | resequencing     |
| Cb-C  | SAMN08005676 | WGS-Cu25 | resequencing     |
| Cb-C  | SAMN08005687 | WGS-Cu36 | resequencing     |
| Cb-C  | SAMN08005688 | WGS-Cu37 | resequencing     |
| Cb-C  | SAMN08005690 | WGS-Cu39 | resequencing     |
| Cb-C  | SAMN08005692 | WGS-Cu41 | resequencing     |
| Cb-C  | SAMN08005696 | WGS-Cu45 | resequencing     |
| Cb-C  | SAMN08005697 | WGS-Cu46 | resequencing     |

|      |              |          |              |
|------|--------------|----------|--------------|
| Cb-C | SAMN08005698 | WGS-Cu47 | resequencing |
| Cb-C | SAMN08005699 | WGS-Cu48 | resequencing |
| Cb-C | SAMN08005761 | WGS-Qk37 | resequencing |
| Cb-C | SAMN08005708 | WGS-Ld3  | resequencing |
| Cb-C | SAMN08005709 | WGS-Ld4  | resequencing |
| Cb-C | SAMN08005710 | WGS-Ld5  | resequencing |
| Cb-C | SAMN08005711 | WGS-Ld6  | resequencing |
| Cb-C | SAMN08005712 | WGS-Ld7  | resequencing |
| Cb-C | SAMN08005713 | WGS-Ld8  | resequencing |
| Cb-C | SAMN08005714 | WGS-Ld9  | resequencing |
| Cb-C | SAMN08005691 | WGS-Cu40 | resequencing |
| Cb-C | SAMN08005693 | WGS-Cu42 | resequencing |
| Cb-C | SAMN08005694 | WGS-Cu43 | resequencing |
| Cb-C | SAMN08005695 | WGS-Cu44 | resequencing |
| Cb-C | SAMN08005701 | WGS-Cu50 | resequencing |
| Cb-C | SAMN08005702 | WGS-Cu51 | resequencing |
| Cb-C | SAMN08005703 | WGS-Cu52 | resequencing |
| Cb-C | SAMN08005704 | WGS-Cu53 | resequencing |
| Cb-C | SAMN08005705 | WGS-Cu54 | resequencing |
| Cb-C | SAMN08005733 | WGS-Qk9  | resequencing |
| Cb-C | SAMN08005823 | WGS-Qk99 | resequencing |
| Cb-C | SAMN08005734 | WGS-Qk10 | resequencing |
| Cb-C | SAMN08005735 | WGS-Qk11 | resequencing |
| Cb-C | SAMN08005736 | WGS-Qk12 | resequencing |
| Cb-C | SAMN08005737 | WGS-Qk13 | resequencing |
| Cb-C | SAMN08005738 | WGS-Qk14 | resequencing |
| Cb-C | SAMN08005739 | WGS-Qk15 | resequencing |
| Cb-C | SAMN08005740 | WGS-Qk16 | resequencing |
| Cb-C | SAMN08005741 | WGS-Qk17 | resequencing |
| Cb-C | SAMN08005742 | WGS-Qk18 | resequencing |
| Cb-C | SAMN08005725 | WGS-Qk1  | resequencing |
| Cb-C | SAMN08005743 | WGS-Qk19 | resequencing |
| Cb-C | SAMN08005744 | WGS-Qk20 | resequencing |
| Cb-C | SAMN08005745 | WGS-Qk21 | resequencing |
| Cb-C | SAMN08005746 | WGS-Qk22 | resequencing |
| Cb-C | SAMN08005747 | WGS-Qk23 | resequencing |

|      |              |          |              |
|------|--------------|----------|--------------|
| Cb-C | SAMN08005748 | WGS-Qk24 | resequencing |
| Cb-C | SAMN08005749 | WGS-Qk25 | resequencing |
| Cb-C | SAMN08005750 | WGS-Qk26 | resequencing |
| Cb-C | SAMN08005752 | WGS-Qk28 | resequencing |
| Cb-C | SAMN08005726 | WGS-Qk2  | resequencing |
| Cb-C | SAMN08005753 | WGS-Qk29 | resequencing |
| Cb-C | SAMN08005754 | WGS-Qk30 | resequencing |
| Cb-C | SAMN08005755 | WGS-Qk31 | resequencing |
| Cb-C | SAMN08005756 | WGS-Qk32 | resequencing |
| Cb-C | SAMN08005757 | WGS-Qk33 | resequencing |
| Cb-C | SAMN08005758 | WGS-Qk34 | resequencing |
| Cb-C | SAMN08005759 | WGS-Qk35 | resequencing |
| Cb-C | SAMN08005760 | WGS-Qk36 | resequencing |
| Cb-C | SAMN08005762 | WGS-Qk38 | resequencing |
| Cb-C | SAMN08005727 | WGS-Qk3  | resequencing |
| Cb-C | SAMN08005763 | WGS-Qk39 | resequencing |
| Cb-C | SAMN08005764 | WGS-Qk40 | resequencing |
| Cb-C | SAMN08005765 | WGS-Qk41 | resequencing |
| Cb-C | SAMN08005766 | WGS-Qk42 | resequencing |
| Cb-C | SAMN08005767 | WGS-Qk43 | resequencing |
| Cb-C | SAMN08005768 | WGS-Qk44 | resequencing |
| Cb-C | SAMN08005769 | WGS-Qk45 | resequencing |
| Cb-C | SAMN08005770 | WGS-Qk46 | resequencing |
| Cb-C | SAMN08005771 | WGS-Qk47 | resequencing |
| Cb-C | SAMN08005772 | WGS-Qk48 | resequencing |
| Cb-C | SAMN08005728 | WGS-Qk4  | resequencing |
| Cb-C | SAMN08005773 | WGS-Qk49 | resequencing |
| Cb-C | SAMN08005774 | WGS-Qk50 | resequencing |
| Cb-C | SAMN08005775 | WGS-Qk51 | resequencing |
| Cb-C | SAMN08005776 | WGS-Qk52 | resequencing |
| Cb-C | SAMN08005777 | WGS-Qk53 | resequencing |
| Cb-C | SAMN08005779 | WGS-Qk55 | resequencing |
| Cb-C | SAMN08005780 | WGS-Qk56 | resequencing |
| Cb-C | SAMN08005781 | WGS-Qk57 | resequencing |
| Cb-C | SAMN08005782 | WGS-Qk58 | resequencing |
| Cb-C | SAMN08005729 | WGS-Qk5  | resequencing |

|      |              |                    |                  |
|------|--------------|--------------------|------------------|
| Cb-C | SAMN08005783 | WGS-Qk59           | resequencing     |
| Cb-C | SAMN08005784 | WGS-Qk60           | resequencing     |
| Cb-C | SAMN08005785 | WGS-Qk61           | resequencing     |
| Cb-C | SAMN08005786 | WGS-Qk62           | resequencing     |
| Cb-C | SAMN08005787 | WGS-Qk63           | resequencing     |
| Cb-C | SAMN08005788 | WGS-Qk64           | resequencing     |
| Cb-C | SAMN08005730 | WGS-Qk6            | resequencing     |
| Cb-C | SAMN08005731 | WGS-Qk7            | resequencing     |
| Cb-C | SAMN08005810 | WGS-Qk86           | resequencing     |
| Cb-C | SAMN08005811 | WGS-Qk87           | resequencing     |
| Cb-C | SAMN08005812 | WGS-Qk88           | resequencing     |
| Cb-C | SAMN08005732 | WGS-Qk8            | resequencing     |
| Cb-C | SAMN08005813 | WGS-Qk89           | resequencing     |
| Cb-C | SAMN08005814 | WGS-Qk90           | resequencing     |
| Cb-C | SAMN08005815 | WGS-Qk91           | resequencing     |
| Cb-C | SAMN08005816 | WGS-Qk92           | resequencing     |
| Cb-C | SAMN08005817 | WGS-Qk93           | resequencing     |
| Cb-C | SAMN08005818 | WGS-Qk94           | resequencing     |
| Cb-C | SAMN08005819 | WGS-Qk95           | resequencing     |
| Cb-C | SAMN08005820 | WGS-Qk96           | resequencing     |
| Cb-C | SAMN08005821 | WGS-Qk97           | resequencing     |
| Cb-C | SAMN08005822 | WGS-Qk98           | resequencing     |
| Cb-C | SAMN08005778 | WGS-Qk54           | resequencing     |
| Cb-C | SAMN08005751 | WGS-Qk27           | resequencing     |
| Cb-C | SAMN20065704 | Aibaiyang          | RNA-resequencing |
| Cb-C | SAMN20065705 | Cixiyiqeqi         | RNA-resequencing |
| Cb-C | SAMN20065706 | Beimai No.4        | RNA-resequencing |
| Cb-C | SAMN20065707 | Huangqingke        | RNA-resequencing |
| Cb-C | SAMN20065708 | Zhijiangheshangtou | RNA-resequencing |
| Cb-C | SAMN20065709 | Hamidamai          | RNA-resequencing |
| Cb-C | SAMN20065710 | Jinxingdamai       | RNA-resequencing |
| Cb-C | SAMN20065711 | Feite210           | RNA-resequencing |
| Cb-C | SAMN20065712 | Zhenongda No.2     | RNA-resequencing |
| Cb-C | SAMN20065713 | Zhenongda No.3     | RNA-resequencing |

Note: Wb-NE, wild barley from the Near East Fertile Crescent. Wb-T, wild barley from Tibetan Plateau. Cb-C, cultivated barley from China. Cb-NE, cultivated barley from the Near East Fertile Crescent.

## Reference

Alexander D.H., Novembre J., Lange K. Fast model-based estimation of ancestry in unrelated individuals. *Genome Res.* **2009**,19,1655-1664. doi: 10.1101/gr.094052.109.

Danecek P., Auton A., Abecasis G.A., Albers C., Banks E., DePristo M., et al. The variant call format and VCFtools. *Bioinformatics.* **2011**,27,2156-2158. doi:10.1093/bioinformatics/btr330.

Malinsky M., Matschiner M., Svardal H. Dsuite - Fast D-statistics and related admixture evidence from VCF files. *Mol. Ecol. Resour.* **2020**,21,584-595. doi:10.1111/1755-0998.13265.

Purcell S., Neale B., Todd-Brown K., Thomas L., Ferreira M.A.R., Bender D., et al. PLINK: a tool set for whole-genome association and population-based linkage analyses. *Am. J. Hum. Genet.* **2007**,81,559-575. doi:10.1086/519795.

Yin C.B., Li H.H., Li S.S., Xu L.D., Zhao Z.G., and Wang J.K. Genetic dissection on rice grain shape by the two-dimensional image analysis in one *japonica* × *indica* population consisting of recombinant inbred lines. *Theor. Appl. Genet.* **2015**,128,1969-1986. doi:10.1007/s00122-015-2560-7.
